# Supplementary material
Source: publisher figshare collection journal article supplement (https://acs.figshare.com/ndownloader/files/14694332)
Supplement: Supplementary file 1 [file 14694332]

## Sheet: F2T
Supplementary Table S3
Uniprot ID	log2 fold change (hypoxia/normoxia)	log CPM	p-value	Gene description	Gene ontology	Protein sequence	Transcript sequence
Q9H3F6	13.5938	5.23918	6.16616e-52	sp|Q9H3F6|BACD3_HUMAN`Q9H3F6`Q:1-313,H:1-313`93.61%ID`E:1e-166`RecName: Full=BTB/POZ domain-containing adapter for CUL3-mediated RhoA degradation protein 3; Short=hBACURD3; AltName: Full=BTB/POZ domain-containing protein KCTD10; AltName: Full=Potassium channel tetramerization domain-containing protein 10;`Eukaryota; Metazoa; Chordata; Craniata; Vertebrata; Euteleostomi; Mammalia; Eutheria; Euarch…	GO:0031463^cellular_component^Cul3-RING ubiquitin ligase complex`GO:0005737^cellular_component^cytoplasm`GO:0005634^cellular_component^nucleus`GO:0043161^biological_process^proteasomal ubiquitin-dependent protein catabolic process`GO:0051260^biological_process^protein homooligomerization`GO:0016567^biological_process^protein ubiquitination	MEEMSGESVVSSAVPAATTRTTSFKGSSPSSKYVKLNVGGALYYTTMQTLTKQDTMLKAMFSGRMEVLTDSEGWILIDRCGKHFGTILNFLRDGAVPLPDSRRETEELLAEAKYYLVQGLSDECTAALQNKETYEPLCKVPLMTSSKEEQRLIATSNKPTVKLLYNRSNNKYSYTSNSDDNMLKNIELFDKLSLRFNGRVLFIKDVIGDEICCWSFYGQGRKIAEVCCTSIVYATEKKQTKVEFPEARIYEETLNILLYESHDGRGPDNALLEATGGAAGRSNHLDEEEERERIERVRRIHIKRPDDRTHHHQ*	TTTTTATTGTTACTCCATAAGGGAAAAGCGGATCACCGGAAGGAAGTGGGTGTTAGCTGACAAAGGTTAGCAGCTTACATTTCGGACGCTTGCTGTGGGTTCTATGGAAGAGATGTCAGGAGAGAGTGTGGTGAGCTCGGCAGTGCCGGCAGCTACAACACGAACAACGTCCTTCAAAGGATCCAGCCCCAGCTCAAAGTATGTGAAGTTAAATGTTGGTGGAGCGCTGTACTACACTACAATGCAGACACTAACAAAGCAAGACACAATGCTTAAAGCCATGTTCAGTGGCAGGATGGAGGTGCTCACAGATAGTGAAGGTTGGATCCTTATCGATCGCTGTGGGAAACACTTTGGAACAATCCTCAACTTTTTACGAGATGGAGCTGTCCCACTGCC…
Q70CQ2	12.6949	4.35991	4.41326e-34	sp|Q70CQ2|UBP34_HUMAN`Q70CQ2`Q:11-2837,H:761-3541`84.71%ID`E:0`RecName: Full=Ubiquitin carboxyl-terminal hydrolase 34; EC=3.4.19.12; AltName: Full=Deubiquitinating enzyme 34; AltName: Full=Ubiquitin thioesterase 34; AltName: Full=Ubiquitin-specific-processing protease 34;`Eukaryota; Metazoa; Chordata; Craniata; Vertebrata; Euteleostomi; Mammalia; Eutheria; Euarchontoglires; Primates; Haplorrhini;…	GO:0004197^molecular_function^cysteine-type endopeptidase activity`GO:0004221^molecular_function^ubiquitin thiolesterase activity`GO:0004843^molecular_function^ubiquitin-specific protease activity`GO:0090263^biological_process^positive regulation of canonical Wnt receptor signaling pathway`GO:0071108^biological_process^protein K48-linked deubiquitination`GO:0006511^biological_process^ubiquitin-de…	HHHHHHHHHHEGPMVEDMLSADDVSCSSSQVSAKSEKNMADFDGEESGCEEELVQINSHAELSSHLQQHLPNLASIYHEHLVQGPAVHKHQYSSHAITDINLDNVCKKGNTLLWDLVQDEDAIHLSEGLINEAEKLLCSLVCWFTDRQIRMRFIEGCLDNLAHHRSVVVSLRLLPKLFGTFQQFGSSYDTHWITMWAEKELHMMKLFFDDLQHYIQEVRENLHKFSLYSHSAEVQVRLQFLTCVFSTLGSPDHFRLSLEQVDILWHCLVEDGECYDDALHWFLNQVRSKDQHAMGMETYKHLFLEKMPQLKPETISMTGLNLFQHLCNLARLATSTLDNTSSCELCGMDQLWGIALRAQSADISRAAIQYINSYYINAGKTGLEKEQEFIRKCMESLLI…	GACCCTTCATATTAAAACTGCTTTTATTAGTCATTTCTGTTAAAATAAAGTCAAAAGAATCGTCAGAACACAGCAGAAGCAGCCAAAAATAAACATCATGGAATGTAGTTCATTAAAGAAAATAAAAGCTCCAGCTGGTCCAACATGAGGGGCTTTATTTTAACCACAGTCGAATAAAGCACCGCTTTTATAGAATTTTAGATTTATATATATTTATATAAAGATATTTATATATATATTCTAAAGTTTTTCATATACACCTTCAGGCAATGACTAGAGATGATTCTTTACAGAATCAAGTTCTTTGTGGTTCTCTTAATTTACAGGTAAACTTGGTTTCTGGATAATTAAACCACAGAAAAACTCAAGGCAACTTTCTTTTGCCTCGTTCTTAAAGTA…
Q7Z9I2	12.3294	3.97982	2.08979e-26	sp|Q7Z9I2|YCP9_SCHPO`Q7Z9I2`Q:5-263,H:7-253`27.88%ID`E:9e-22`RecName: Full=Uncharacterized oxidoreductase C663.09c; EC=1.-.-.-;`Eukaryota; Fungi; Dikarya; Ascomycota; Taphrinomycotina; Schizosaccharomycetes; Schizosaccharomycetales; Schizosaccharomycetaceae; Schizosaccharomyces.	GO:0005829^cellular_component^cytosol`GO:0005634^cellular_component^nucleus`GO:0000166^molecular_function^nucleotide binding`GO:0016491^molecular_function^oxidoreductase activity	MAAPIALIQGASRGLGLAFCKHILNNKPLASVVATCRNPNGADELRGLVGQHPDRLTVLKLDVNQEEDIRGAAERVKEAFGRLDLLVNSSAMLHPSGKGETSLRDVSAQGIISTLTTNTVGPLVMAKYFSPLLLKGSGGFGQQPSEKAKQHSGIIVNITAKVGSIGDNGLGGWYSYRMSKAALNMATRNLSIELGRSRPKVVCVSLHPGTVNTDLSRPYHKNVPKDKLFSSEHSVNCLMSIINSLSIEKTGKAYSWDGAELPW*	ACTTCCAGCTTGTTTTAATGCGTTCATGATTCTGTTAATAGCTCCCTCTTGTGGCATGTTGCGGTATTGCATACATCCAAAGATTACAATTATAAAAATTAAACACAGAATCCAGTCTATATAAAGACTTTAAAAACGAGGTATCTGGTGTTTACAGAATATCAGTTTAATAATTTCAATCCAATCTGAATTATTTTTTAGATCTAAATGGCATGTAACAGTAAAAAACGTGTCGATTTCTACAGCTTTCTCCCCCATTCCTCCATAGTATTTTGATTAATAAAAATTAGAGGCTGGGGATTCCACTTTTTATACCTTTTCATTTCCAGTTTTGATTTTTTTTTCCTTTAGCATAAAATAATTTGCTCTCCTTGAAACGAAATAACAAGATGAGGACAT…
Q4JL91	12.2336	3.88482	1.01466e-08	sp|Q4JL91|IPPK_DANRE`Q4JL91`Q:1-491,H:1-481`57.78%ID`E:3e-165`RecName: Full=Inositol-pentakisphosphate 2-kinase; EC=2.7.1.158; AltName: Full=Inositol-1,3,4,5,6-pentakisphosphate 2-kinase; AltName: Full=Ins(1,3,4,5,6)P5 2-kinase; Short=InsP5 2-kinase;`Eukaryota; Metazoa; Chordata; Craniata; Vertebrata; Euteleostomi; Actinopterygii; Neopterygii; Teleostei; Ostariophysi; Cypriniformes; Cyprinidae; D…	GO:0005813^cellular_component^centrosome`GO:0005932^cellular_component^microtubule basal body`GO:0005634^cellular_component^nucleus`GO:0005524^molecular_function^ATP binding`GO:0035299^molecular_function^inositol pentakisphosphate 2-kinase activity`GO:0007368^biological_process^determination of left/right symmetry`GO:0032402^biological_process^melanosome transport	MEVDKMDENDWKYHGEGNKSLVVCHVQFPRVLRLLKYPAADSENPPQTAEQAFRQIQNMVDFSSKVMSSLLGDKFIHSGEVVKLPLEFVRQLSIKIQQQRPAWRCDKVMDIYSGCALCLPNLTSPALHQATLTPPLCIEIKPKCGFLPSHKHVSKDIKARVCRYCMHQHFKVASGKWKRRSLYCPLDLFSGNKQRMTFAVRHLLEEPQNNFKVFKGGQCVYSCKESSDDPPDVNGLLHHLRPYFLQGNNRTSSHMTNKAILNDFIQVLVNALLSERGDGGAVTDRQEEGRSFCEASLFNRERVGHASQGLPADSVLFRILQTQMLDTLDIEGLFPLYRRVEQHLQDFPKERSRLQVDGPYNEAFLEKVQKCRMEDDGSVESAIAKVHQYCVAMTAKDCS…	GGAAGAGTCCAGAGCGCGCGAGGCTCAAACCTGGTGTAGCTTTCCCCAATAAACTCGACATTTTCACGGTTTTACTTCAAAGTAGCCCCAACAGCAACAAGATACCGTAAACATTCAAACCAGAAGAGTGTTCCTTAAACTGACCACATCAGGGATTAGTGAATGGCGACGATGCAGGAGAAGACCGGGGAGGAGAACGGGGATGAGGTGAAGATGCTGGAGGGTCACATTGAAGACCTGCGAGCTGAAATAGCATCACTGCAGCGTCAGAAAGAAGAACTCAACAGGGACTCGATGCTCCACTTTGAAGGAGCCATGCTGGACGCTCTGCTCATTGTGGGTGGGCAGACCCAAAACAGAGACGAGGAGACGGTGATGTTCAAGCTGAAGGAGGAGGTG…
Q803I4	12.2258	3.87682	1.00177e-08	sp|Q803I4|RING2_DANRE`Q803I4`Q:28-369,H:1-336`91.52%ID`E:0`RecName: Full=E3 ubiquitin-protein ligase RING2; EC=6.3.2.-; AltName: Full=RING finger protein 1B; Short=RING1b; AltName: Full=RING finger protein 2;`Eukaryota; Metazoa; Chordata; Craniata; Vertebrata; Euteleostomi; Actinopterygii; Neopterygii; Teleostei; Ostariophysi; Cypriniformes; Cyprinidae; Danio.	GO:0071339^cellular_component^MLL1 complex`GO:0035102^cellular_component^PRC1 complex`GO:0016874^molecular_function^ligase activity`GO:0046872^molecular_function^metal ion binding`GO:0008270^molecular_function^zinc ion binding`GO:0033339^biological_process^pectoral fin development`GO:0016567^biological_process^protein ubiquitination`GO:0006355^biological_process^regulation of transcription, DNA-d…	HHFARLQPYCFTLARRLGLARRSQLNTMTQTVQTNGVQPLSKTWELSLYELQRTPQEAITDGLEIAVSPRSLHSELMCPICLDMLKNTMTTKECLHRFCADCIITALRSGNKECPTCRKKLVSKRSLRPDPNFDALISKIYPSRDEYEAHQERVLARISKHNNQQALSHSIEEGLKIQAMTRLQRGKRHTVENGSGAEDNGDSSHCSNASVHSNQEAGPSIKRTKMSDDSGLDMDNTVENGGGDSVMDGGASEIELVFRPHPTLMEKDDGHSSVEFVPRYIKTSGNATVDHLSKYLAVRLALEELRRNADASPVNVEAASEKQYTIYIPTPGNQFTVLNGSFSLELVSEKYWKVNKPMELYFAPTKEHK*	GACGCATTTTAGTGTGACCGCCTCCTCATCCCAACGTTGACAGAAGAGGTTTTTCATGATTCTCTGGTGACCTTACATGTAAAGAATCAGGCATGGCGGGGCTCACGACCTCACACTGAACCACAAAGATCATGTTTTATTGTCAAAACAGAAAATGCCATTTACAGTTTCCACAAAGACAGAACAGTATCAAACGTGACAGGAGTGAACGCTCGCCAAAGCATGGATTCTGGGAGAGCTTCTGTTCAACAAAAACCAGTCCACATGAAGACGGGACTAGAACCTCAGTCCAGCATGGATCCAGCAGCTCTTCAATTCAAAATGAGAAGAAAGTGGCACACGTGACTCCCCCATCCTGACAGCAGACACTAAGACCATCTGGAGTTTTTGGAAACAGTT…
Q9NV31	12.099	3.75096	1.60217e-05	sp|Q9NV31|IMP3_HUMAN`Q9NV31`Q:46-228,H:1-184`70.11%ID`E:5e-77`RecName: Full=U3 small nucleolar ribonucleoprotein protein IMP3; Short=U3 snoRNP protein IMP3; AltName: Full=BRMS2;`Eukaryota; Metazoa; Chordata; Craniata; Vertebrata; Euteleostomi; Mammalia; Eutheria; Euarchontoglires; Primates; Haplorrhini; Catarrhini; Hominidae; Homo.	GO:0005730^cellular_component^nucleolus`GO:0030529^cellular_component^ribonucleoprotein complex`GO:0019843^molecular_function^rRNA binding`GO:0006364^biological_process^rRNA processing	VKSTHNLNVFEEEPETVNAHAHFLFSSAARGVQSVLVQWVINVVRMVRKLKFHEEKLLKKVDFINWEVDNNLHEVKVLRRFRIEKREDYTKYNKLSRNIRDLAQKIRDLDEKDGFRAQSSHRLLEKLYSVGLIPTRQNLSLTEKVTASSFCRRRLPSIMLNLRMAQNLKTAITFIEQGHVRVGPDVVTDPAFLVTRNMEDFVTWVDSSKIRQHVMNYNDERDDFDMTA*	GTAAAGTCGACTCACAATTTAAATGTCTTCGAAGAAGAACCAGAGACAGTGAATGCGCATGCGCATTTCCTGTTTTCCTCGGCGGCACGCGGGGTTCAGAGCGTGTTAGTTCAGTGGGTCATTAACGTGGTCAGGATGGTCCGTAAACTGAAATTCCACGAGGAGAAGCTCCTGAAGAAGGTGGACTTCATCAACTGGGAGGTGGACAACAACCTGCACGAGGTGAAGGTTCTGCGGCGGTTCCGCATCGAGAAGAGAGAGGATTACACCAAGTACAACAAGCTGAGTCGAAACATCAGAGATCTGGCGCAGAAAATCCGGGACTTGGATGAGAAGGATGGTTTCAGGGCCCAGAGCTCCCACCGGCTGCTGGAGAAACTGTACAGCGTCGGCCTCATC…
P48738	11.9138	3.56712	2.80102e-08	sp|P48738|PIPNA_RABIT`P48738`Q:1-269,H:2-270`73.61%ID`E:1e-122`RecName: Full=Phosphatidylinositol transfer protein alpha isoform; Short=PI-TP-alpha; Short=PtdIns transfer protein alpha; Short=PtdInsTP alpha;`Eukaryota; Metazoa; Chordata; Craniata; Vertebrata; Euteleostomi; Mammalia; Eutheria; Euarchontoglires; Glires; Lagomorpha; Leporidae; Oryctolagus.	GO:0005737^cellular_component^cytoplasm`GO:0008289^molecular_function^lipid binding`GO:0006810^biological_process^transport	MLIKEFRIVLPVSVEEYQVGQLYAVAEASKNETGGGEGVEVLVNEPYEESGEKGQYTHKVYHLQSKVPPVIRALAPKGSLEIHEKAWNAYPYCRTILTNTYMKEKFMIKIETWHKPDMGNQENVHGLDDKTWGNVEVVNIDIADKDSISPKDYKADQDPSIFKSEKTGRGPLGPDWKNELANNPHCPHMCAYKLVTVEFKWLGLQSKIESYIQKVEKRLFTHFHRQLFCSIDKWIELTMDDIRRMEEETKKELDEMRKNDEVKGMAADD*	CCCGGACTTCCTGAAGATAAGTGGGTGTGTCCTCGTGCGTAGGCCGCGCCCCCTCGACACTCTCGGCATCTCCCAGGAAGAGAGGCCGGAGTGAAAAGCGGCCTGTCAGCCGGGAAGGAGAGTCTATCCGCCGGTCCAGCCCTCTCTACGCGCCTCTGAAGCCCGGACACCATGCTCATCAAGGAGTTCCGGATCGTTCTGCCCGTCTCAGTGGAAGAGTACCAAGTGGGGCAGCTGTACGCCGTAGCAGAAGCCAGTAAGAATGAGACAGGTGGAGGAGAAGGTGTGGAGGTGCTGGTCAACGAGCCGTATGAGGAGAGTGGCGAGAAGGGACAGTACACCCACAAGGTCTACCATCTGCAGAGCAAAGTGCCACCTGTTATCCGGGCTCTGGCTCCA…
Q9R0A0	11.8988	3.55228	5.13065e-08	sp|Q9R0A0|PEX14_MOUSE`Q9R0A0`Q:18-392,H:1-376`57.8%ID`E:6e-111`RecName: Full=Peroxisomal membrane protein PEX14; AltName: Full=PTS1 receptor-docking protein; AltName: Full=Peroxin-14; AltName: Full=Peroxisomal membrane anchor protein PEX14;`Eukaryota; Metazoa; Chordata; Craniata; Vertebrata; Euteleostomi; Mammalia; Eutheria; Euarchontoglires; Glires; Rodentia; Sciurognathi; Muroidea; Muridae; Mur…	GO:0016021^cellular_component^integral to membrane`GO:0005778^cellular_component^peroxisomal membrane`GO:0043234^cellular_component^protein complex`GO:0003714^molecular_function^transcription corepressor activity`GO:0034453^biological_process^microtubule anchoring`GO:0032091^biological_process^negative regulation of protein binding`GO:0043433^biological_process^negative regulation of sequence-spe…	MDGTGKAIDRGYIESEKMASIDQADTPTQSGPPPGEDGAGHPREALVATAVKFLQNPKVRQSPLLTRKSFLKKKGLTDEEIELAIQRSGSTEEVLPQNPLGLPHPPYTTLLAPAPPSPAGYRWRDYGALTIILAGMAFGFHQLYKKYILPLIMGSREDKKHLQRMESNIAAMSGTLTQTVSQLQQTLSSVQELLIQQQQKIQELSQELSTAKASTSTSRILDNQTIADLKAEIVSLKGLLLSRKQFPSSPAIAKIPSWQIPLKPSAASCSPPANHTNSSSDISPISNESSNSSPVKDGHHSSQDALGGPDGANGIDGGPCSPSPGTMGPLDQVRMEVQGEEKKEDDVSHTEEEEEEGLSMQTEDRRGGDGQINEQVDKLRRPEGASNESEVD*	GGGTTATTTATTCATAAAAACAATTCAAAAATAGATTTTACAGCATATTGTGAGGTTATGTCTTCATTCAGGACTGTCTTCATACACAAAACCTAATCTGAGGTGAGGTGTCTGCGATCCCCCCCTCTTCCTCTGCACCCCGACCATACAGAGGTGGAAGTGGTAGAAGAGATGATATCCCTTCTTCTCACACATGGACTTTTCTTGTCAGTGAGATACATAGTGAGTAATTCAATAAGTCAAGAATTCATTTATTACTTTCTTTTTCAATCACAGGGTATTTTTTAACCTCCCCCATCCACCCCCACACTGAGAGAGAGAGAGAGAGAAAAACCTAAAGCAATACAAGTTCTGCAACTTCCATCTGTGGCAGCACTCGTGTCTTCCTGCAGCATAATT…
Q9Y6G3	11.6565	3.31204	8.34895e-07	sp|Q9Y6G3|RM42_HUMAN`Q9Y6G3`Q:37-145,H:34-142`61.47%ID`E:5e-34`RecName: Full=39S ribosomal protein L42, mitochondrial; Short=L42mt; Short=MRP-L42; AltName: Full=28S ribosomal protein S32, mitochondrial; Short=MRP-S32; Short=S32mt; AltName: Full=39S ribosomal protein L31, mitochondrial; Short=L31mt; Short=MRP-L31; Flags: Precursor;`Eukaryota; Metazoa; Chordata; Craniata; Vertebrata; Euteleostomi; …	GO:0005763^cellular_component^mitochondrial small ribosomal subunit`GO:0005886^cellular_component^plasma membrane`GO:0003735^molecular_function^structural constituent of ribosome`GO:0006412^biological_process^translation	MASGQLCKLHGLLTRFSSAFAARSGRRCLVPIRYKSSVNSPIAEPPKSDVDIGVTSDGKTIVCYHPAVDIPYEFTQPVERPDPLTNSIETHDQVLKAHLSTEVLKDKKGPTIEELSKMFFTTKHRFYPVGQYHRRRINKNPPKDR*	CATCAGGTGGTGGAAACAGTTGAAAGAAAAAAAAACTGATAGTAACGTAAGTGTACATTACTGTGACAAATTTAACGTTAAAAGGATTAAATATGTTACTATCTGTCCTTGGGGGGGTTCTTGTTGATGCGCCTCCTGTGATATTGTCCTACTGGATAAAAGCGGTGTTTAGTGGTGAAGAACATCTTGCTAAGCTCCTCTATAGTTGGTCCCTTTTTGTCCTTCAGCACCTCCGTGCTGAGGTGAGCCTTTAAAACCTGATCATGAGTCTCTATGGAGTTGGTCAAAGGGTCTGGACGTTCCACAGGCTGGGTGAATTCATAGGGAATATCCACAGCAGGATGGTAGCACACTATGGTTTTCCCGTCTGATGTCACTCCAATGTCTACATCACTTTTA…
Q8JIY8	11.1556	2.82295	4.04418e-05	sp|Q8JIY8|MK67I_DANRE`Q8JIY8`Q:8-218,H:11-224`65.89%ID`E:2e-81`RecName: Full=MKI67 FHA domain-interacting nucleolar phosphoprotein; AltName: Full=Nucleolar phosphoprotein NOPP34-like protein;`Eukaryota; Metazoa; Chordata; Craniata; Vertebrata; Euteleostomi; Actinopterygii; Neopterygii; Teleostei; Ostariophysi; Cypriniformes; Cyprinidae; Danio.	GO:0005730^cellular_component^nucleolus`GO:0000166^molecular_function^nucleotide binding`GO:0003723^molecular_function^RNA binding`GO:0007275^biological_process^multicellular organismal development`GO:0010923^biological_process^negative regulation of phosphatase activity	MSAKVPTAAELLALNPEEEKKFQEKIREAKKKPRKGGALVPGVVYVGHLPLGLFEPQLRSYFEQFGSVQRLRLSRSKKTGGSKGFAFVEFECEDVARIVAETMNNYLMGEKLLKCHMVPAEKVHEKLFVGSQRNFRKPSHPAVTRYNRKRSAEQVAKMTERLLRKEAKLRQKLKAHGMEYDFPGFAAQKKLMEAADSSSCSDDVTPVCTPSFTERRKSAVSDDTDDEIILKIPAVEEVEEEDSEEEEESSEEEQ*	GACCTGCAAATAAAAGCCAGGATCCTCCCGACCAGCAGAGGGCAGCACGAGCCGCCATGTCCTGCTGTCGTCACTTCCGGTCTTCTCCTCTCCACGTGCAGGACTGTCTGCGGGCCTCGGAGTTTCACGGATCATCATTGGAGATTCTGCATCTAGGAAAATGAGCGCAAAGGTTCCGACTGCCGCCGAACTTCTGGCTCTAAACCCGGAAGAGGAGAAGAAATTCCAGGAGAAGATCCGCGAGGCGAAGAAGAAACCCCGAAAGGGGGGCGCTCTGGTTCCTGGTGTGGTCTATGTGGGACACCTTCCTCTGGGTCTGTTTGAACCTCAGCTCCGGTCCTACTTTGAGCAGTTCGGATCGGTCCAGAGGCTCCGGCTCTCCAGGAGCAAAAAGACCGG…
Q9Y4E6	11.0375	3.82024	3.72332e-19	sp|Q9Y4E6|WDR7_HUMAN`Q9Y4E6`Q:1-1449,H:1-1490`77.91%ID`E:0`RecName: Full=WD repeat-containing protein 7; AltName: Full=Rabconnectin-3 beta; AltName: Full=TGF-beta resistance-associated protein TRAG;`Eukaryota; Metazoa; Chordata; Craniata; Vertebrata; Euteleostomi; Mammalia; Eutheria; Euarchontoglires; Primates; Haplorrhini; Catarrhini; Hominidae; Homo.	.	MSGNNLVLPIVLWSRTAPTHCISSLLVMDDFSTIITGCHDGQICLWDMTPELQICPRAMLFGHTASITCLSKASASSDKQYIVSASESGEMCLWDVNDGRCIEFTKLACAHTGIQFYQFTIGTEKEGRLLCNGHYPEILVVDATSLEVLYSLVSKICPDWISSMSIIRSHRTQEDTVVAVSVTGILKVWIITAEVSKMQDLDPVFEEESKPIYCQGCQSISFCSFTQSSLLVVCSKYWRVFDAGDYSLLCSVASESDQSWTGGEFVAADKVIIWTEDGCSYIYKLPASCLSASEHFRSDIGKTKEGSIPPLIYKIAERADKQLLICPPVTRFFFGRREPFHKLLIQGDSAGRLSLWSVPDSTPRQTAATCAELQVSSTISLQEAFDKLKPVSAGIIDQL…	GACACAAAACCCAGGAATGCTTTTATTGGACAACAGCAATACATTTAACAACACATGTACGTGATGCACAGCAGGATGAAGGGAAGCTCATATTCATGCAGGACATCAGTCACTTTAAACACGTCACTTCCTGTTAACAATCAGAACTGAATGAGCAGAAATAGGAGAGCGATGGGAGCACGTCAGGAAGGAGAAAACAAAAGAGCTTCTCCTGCTTCACCACAGACCCTCTTTTTCTGGCTGACTGAGCTGATCTCCTCACTTGTTACTTACTGTTCAGCTCTTCCTCCCTGCCTCCTCCACTTTTCTCACCCATCCTCCCCAGAGAGGCTGCCAAAAACATATTTTCTCAAACTGTTAAGAGTGCCGGAGGAAAGGAAAGATTAAGATCTCAGAGCT…
Q61190	10.8389	2.51796	5.11865e-05	sp|Q61190|I10R2_MOUSE`Q61190`Q:21-242,H:21-237`25.78%ID`E:3e-11`RecName: Full=Interleukin-10 receptor subunit beta; Short=IL-10 receptor subunit beta; Short=IL-10R subunit beta; Short=IL-10RB; AltName: Full=Cytokine receptor class-II member 4; AltName: Full=Cytokine receptor family 2 member 4; Short=CRF2-4; AltName: Full=Interleukin-10 receptor subunit 2; Short=IL-10R subunit 2; Short=IL-10R2; Al…	GO:0016021^cellular_component^integral to membrane	MSFLLFLICLARIPGSAPLDLPAPVNVSVVSINFAPTLQWDPGPGTPAGTLYRVSKRTNNKKFKLLDRLTNATSMVLKLNASNMFQFRVWATFNGSESKKTEVEFDPYTDNVVGPLNLSLSGCGSCLRVNISLPEADRHSGVPDIQKLYDSSFKVFWRKGSQGKVEELSTKNKSFTLSNLEKGVEYCVQADMSGQNPKKTIPSAWSCAFTSPAEPRTGAAAVITSLILLFILSMMVLSGLFYTGFLCELKATRPRALMTPPAKVPIFTPDETLLDPVSITPAGMTKQIQLLGASLTSSEDEEEEAVVPLYIDRIPELSSGESSGLESRGGSGEGQEAAENVFKSLNAPAEEEEVHEGDEDGTEADEEEGGITENSSQTGVQGEEERIPEISSNVNLVSV…	GTCCAATAAATTAGTAAATGGTGTTCATAATGTGAATTCGTCATTAGTAACCATATAAAAATGATCAGAAGCATTGAAAACCTTTATTTACAGAAGTCCATAGGACTGAGATGGATTTGGCAGAACCGGTATCACGGTTTCTGCTTCTATACTGAACTTTAACAGATAACCAGACAGTCACTTCCCACAGTTACCCACACGGGGGCAGTATTTTCTAAAATAAGCCCCTCTCTGGATAGAGGAACATCTGAAGAGGAGAAGTGGACGTTCTGCTGGTTCTGCTGGTTCTGCTGGTCCTGCTGGTCCTCGGACTATTTTCCAGGCGCCAGCACCCCCGTACCTGAGTCCACCTGCAGACGTCTCCACAATCCTGGATTCTTCAAACATAGGCGTAAACGT…
O13166	10.6962	2.36457	3.99918e-07	sp|O13166|TLE2_DANRE`O13166`Q:1-765,H:1-761`93.47%ID`E:0`RecName: Full=Protein groucho-2; AltName: Full=Groucho-related Grg2;`Eukaryota; Metazoa; Chordata; Craniata; Vertebrata; Euteleostomi; Actinopterygii; Neopterygii; Teleostei; Ostariophysi; Cypriniformes; Cyprinidae; Danio.	GO:0005634^cellular_component^nucleus`GO:0006355^biological_process^regulation of transcription, DNA-dependent	MYPQGRHPAPHQPGQPGFKFTVAESCDRIKDEFQFLQAQYHSLKVEYDKLANEKTEMQRHYVMYYEMSYGLNIEMHKQTEIAKRLNAILAQIMPFLSQEHQQQVAQAVERAKQVTMTELNAIIGVRGLPNLPLTQQQLQAQHLSHAAHGPPVQLPPHPSGLQPPGIPPVTGSGSGLLALGALGSQAHLPVKDEKNHHDLEHSRENTNNSISPSESLRTSSEKHRSSSDYSLDSKKRKVEEKDSVSRYDSDGEKSDDLVVDVSNEDPATPRASPAHSPPENGIDKPRPPKKDTPNSPASVASSGSTPSSKAKELSHNDKSSTPGLKSNTPTPRNDAPTPGTSSTPGLRPILGKPPGMEALAAPALRTPLSYPTPFAMMGHHEMNGGLTSPGVYAGLHISP…	TTCCTGAAAGAACTTTATTTACAGGTTCATATATAGCAAGGATCACGATGGTAGTTAAGAAAATCCCAGTCACTCCGTCTATATGTGCCCTAACGAAAAAGAAAAGAAAAAACAAATTTGAGCTTTAAAGGTCAACTGAATGCAGCAGAAGTCTGACCACTTTTCTTCCTAAACTGAATTCCACTTCCTGGTTCCTGAAAATCTGTCATTTTTAAGAAGAACTTGTGGCCGCACATCTGAGGAAACCCGGTCCGGTTCTGTCGGGACGCACAAATGATACAATCATGGTGCTGCTGAAGCGGAGCGTCGAACCGGGTCGAGGTCGGACCGGGTCGAGACCGGCCCGTGCCTTCATGCTCCTCCGACGCTCTGAGAATCCAGCTGTTTGCAACATATTCA…
P38621	10.6473	2.31738	1.66305e-14	sp|P38621|ZN12_MICSA`P38621`Q:356-693,H:72-407`43.36%ID`E:7e-80`RecName: Full=Zinc finger protein ZFMSA12A;`Eukaryota; Metazoa; Chordata; Craniata; Vertebrata; Euteleostomi; Actinopterygii; Neopterygii; Teleostei; Euteleostei; Neoteleostei; Acanthomorpha; Acanthopterygii; Percomorpha; Perciformes; Percoidei; Centrarchidae; Micropterus.	GO:0005634^cellular_component^nucleus`GO:0003677^molecular_function^DNA binding`GO:0046872^molecular_function^metal ion binding`GO:0008270^molecular_function^zinc ion binding	MVPPLPLSSLRLLIPPIRMLAAAMWQLALKQRVEHYGKLEDFVLLVTEAVPQLLTDRQKSLLLLALRAKVLLSDPTDVNHHLNRIQAVFQATEDNDAKQWCTALSSLVHRVTLQSADIQRLLQEVFDQSFDSALLSLVSNFLSRIEQLFPVPDFKQAASWLDGTPVGLEVNVQEDLMELLSHPSCRLGKATTAVGSASEETLLSAWSHPLIYKLSNPDPPPFEGHPAEVELVKVEVVKPVDEEHLEEVVVGPSSEGNEESNQRSAADTIETSLNSCKDSPGNTSVQSEDTAGDVDDSCSKVTASALQSISHNSQRVAHKCPQCGKCFIYRSQVIRHLRSNRSCSTALSSPNAAKEPRPLRKFPCFQCSLVFKAKAELLTHQRSHRARPFYRCQHCDKAF…	ATCTTCATCCTCACTTTATTCTACTCAGCAACAAACGGGAAAACAAACCAAAAGCTTCTCCATCTTTGGTAACACAAGGCTTTGAATTCAGTCTCTGTCGAAAACGTCGTGCTCTCTGTGTCCGTTTAAACGTCTCTCTGCTCCTCCTGACCGTCCCGGCTGGCCTCGGCGGGCCTGTGCGTCAGCAGGTGTCTGCTCAGGTGAGTCTTGCGGGTGTAGCTCTTGGGGCAGAGGGGGCAGGCGTGGGGCCGGGTGTTGCTGTGGGACAGCAAATGCTTCTTCAGGTCGAACTTCCGCCGCAGGCACTTGCCGCAGTCCGGGCACGAGTACGGCTTCTCCCCCGTGTGGATCCTGCGGTGCTCCGTCAGGTGGCAGGACATGGAGAAGCCCTTCCCGCAG…
O00750	10.5761	2.24732	5.11333e-13	sp|O00750|P3C2B_HUMAN`O00750`Q:1-410,H:1214-1626`74.09%ID`E:4e-174`RecName: Full=Phosphatidylinositol 4-phosphate 3-kinase C2 domain-containing subunit beta; Short=PI3K-C2-beta; Short=PtdIns-3-kinase C2 subunit beta; EC=2.7.1.154; AltName: Full=C2-PI3K; AltName: Full=Phosphoinositide 3-kinase-C2-beta;`Eukaryota; Metazoa; Chordata; Craniata; Vertebrata; Euteleostomi; Mammalia; Eutheria; Euarchonto…	GO:0005829^cellular_component^cytosol`GO:0030139^cellular_component^endocytic vesicle`GO:0005783^cellular_component^endoplasmic reticulum`GO:0043231^cellular_component^intracellular membrane-bounded organelle`GO:0005634^cellular_component^nucleus`GO:0005886^cellular_component^plasma membrane`GO:0035005^molecular_function^1-phosphatidylinositol-4-phosphate 3-kinase activity`GO:0005524^molecular_fu…	FGKFLGHAQMFGNIKRDRAPFVFTSDMAFVINGGDKPSSRFHDFVDLCCEAYNLIRKHAHLFLNLLGLMLSCGIPELSDLDDLKYVYDALRPHETEADATMYFTRLIESSLGSVATKLNFFIHNLAQMKFASSEERPTLSFAPRVHTAKSGGVIRSLYICTHIRTSNTSKGYAYVVKVERDGQEAQLVQRTFEEFHELHCKLRLVFPSSKLPSFPSRFVIGRSRSEATADRRKDELNGYVWHLIHAAPEVAQCDLVYTFFHPLPRDDRAVTTSTKPAEIMWSAASGKELGEVKLSISFKSEKLFIMVMHIRGLQPLQDGTDPDPYVKLYLLPDPQKMSKRKTKAARRTCNPTYNEMLVYERIPRGDLDQRVIHLRVLSDGAFWENTLLGETFIQLNRLV…	CTTTGGGAAGTTCCTGGGACACGCCCAGATGTTTGGAAACATTAAACGAGACCGCGCCCCCTTTGTTTTCACCTCTGACATGGCGTTCGTCATCAACGGAGGAGACAAACCGTCCAGCCGCTTCCACGACTTTGTGGATCTTTGCTGCGAGGCGTACAACCTGATCCGCAAACACGCACACCTGTTCCTCAACCTGCTGGGCCTGATGTTGTCCTGTGGGATTCCTGAACTGTCTGATCTGGATGATCTGAAGTACGTCTACGACGCCCTGAGGCCTCACGAGACTGAAGCCGACGCCACCATGTACTTCACCAGGCTGATTGAATCCAGTCTGGGCAGCGTTGCCACCAAACTCAACTTCTTCATTCACAATCTGGCCCAGATGAAGTTCGCCTCATC…
P54939	10.532	2.20361	1.58459e-10	sp|P54939|TLN1_CHICK`P54939`Q:24-1895,H:666-2538`84.57%ID`E:0`RecName: Full=Talin-1;`Eukaryota; Metazoa; Chordata; Craniata; Vertebrata; Euteleostomi; Archosauria; Dinosauria; Saurischia; Theropoda; Coelurosauria; Aves; Neognathae; Galliformes; Phasianidae; Phasianinae; Gallus.	GO:0015629^cellular_component^actin cytoskeleton`GO:0005829^cellular_component^cytosol`GO:0005925^cellular_component^focal adhesion`GO:0001726^cellular_component^ruffle`GO:0032587^cellular_component^ruffle membrane`GO:0005200^molecular_function^structural constituent of cytoskeleton`GO:0007155^biological_process^cell adhesion`GO:0007016^biological_process^cytoskeletal anchoring at plasma membrane	FQLGLRGSFRAASRRMSSNYQMPDMLMQLAKAVANAAAALVLKAKNVAQKTEDSAQQNRVIAAATQCALSTSQLVACTRVVAPTISSPVCQEQLIEAGKLVAKSVEGCVDASQSATNDEGLLKQVGVAATGVTQALNELLQHIKQYASGGHPIGRHGEATDRILNVTENIFSSMGDAGEMVRQARILAQATSDLVNAIKMDAEGESDLENSRKLLSAAKLLADATAKMVEAAKGAAANPDSEEQQQKLREAAEGLRMATNAAAQNAIKKRLVNKLENAAKQAAAAATQTIAAAQHAASTNKNQAAQQQLVQSCKVVAEQIPQLVQGVRGSQSQPDSPSAQLALINASQNFLQPGAKMVTAAKATVPTISDQASAMQLSQCAKNLASALAELRTASQKAQ…	TTCCAGCTTGGACTTAGAGGAAGTTTCAGGGCAGCTTCCAGGAGAATGTCCTCTAATTACCAAATGCCGGATATGCTGATGCAGCTGGCCAAAGCCGTGGCCAACGCCGCCGCAGCTCTGGTGCTCAAAGCCAAGAACGTGGCCCAGAAGACGGAGGATTCGGCCCAGCAGAACCGAGTGATCGCGGCAGCCACTCAGTGTGCTCTGTCCACATCTCAGCTGGTCGCCTGCACCAGGGTGGTGGCTCCAACCATCAGCTCTCCAGTGTGCCAGGAGCAGCTGATCGAAGCCGGCAAGCTGGTGGCCAAGTCCGTGGAGGGCTGCGTGGACGCGTCGCAGTCGGCCACCAACGATGAAGGCCTGCTGAAGCAAGTGGGCGTGGCCGCCACAGGTGTCACT…
Q969K7	10.5083	2.18027	7.06725e-05	sp|Q969K7|TMM54_HUMAN`Q969K7`Q:40-230,H:15-202`37.17%ID`E:5e-29`RecName: Full=Transmembrane protein 54; AltName: Full=Beta-casein-like protein; AltName: Full=Protein CAC-1;`Eukaryota; Metazoa; Chordata; Craniata; Vertebrata; Euteleostomi; Mammalia; Eutheria; Euarchontoglires; Primates; Haplorrhini; Catarrhini; Hominidae; Homo.	GO:0016021^cellular_component^integral to membrane	DQPRCSVEGVADAAPAAHTHGDLTEMAGSGLCCGSLEEPKALMKMGLSAIMVGHVNFLLGALVHGVVLRHINQHRQARAMLYSISNVVALTSGMVGVIVGILAIVLSKNKKSRSLTWSLFSFGLVSAIMSVASAVGLFIAMVRAIINNGRSLLKHCRFPDAIGYSSVTNECPFDPTRIYSTTLILWVPLIIMCIVQLVFSARCSAACASFLGLPCCPRRKKSPPHIRPSNVGKPLQEVHHSNHTDHLGSHSELAQPFTEPRHHKKPARANTEPSRTHAEPKKPYADQPRTSHKPVKAYTGRLETPIKPVKSYTDRPQTPPKPVKPYMDRPETPIKPTKSYRDHPGAHDGPQRHASAPPRQYRPPPQPLPHQHHSLPQSERPQQHRERPERRTGSHPRKP…	GACCAGCCGAGGTGTTCAGTTGAAGGTGTCGCAGACGCCGCGCCGGCTGCGCACACGCATGGTGACCTGACAGAGATGGCCGGTTCAGGATTGTGCTGTGGCAGCCTGGAGGAGCCCAAGGCGCTGATGAAGATGGGGCTGAGCGCCATCATGGTGGGCCATGTCAACTTCCTGCTGGGGGCCCTGGTGCACGGCGTGGTCCTCAGGCACATCAACCAGCACCGACAGGCCCGAGCCATGCTGTACTCCATCTCCAACGTGGTGGCCCTCACCTCAGGGATGGTGGGCGTCATCGTGGGCATTCTGGCCATCGTCCTGTCAAAGAACAAGAAGAGCAGATCCCTGACCTGGTCTCTCTTCTCATTTGGCCTGGTGTCTGCAATCATGTCTGTGGCATCC…
Q13574	10.3738	2.0538	6.84639e-07	sp|Q13574|DGKZ_HUMAN`Q13574`Q:93-384,H:894-1117`48.29%ID`E:1e-61`RecName: Full=Diacylglycerol kinase zeta; Short=DAG kinase zeta; EC=2.7.1.107; AltName: Full=Diglyceride kinase zeta; Short=DGK-zeta;`Eukaryota; Metazoa; Chordata; Craniata; Vertebrata; Euteleostomi; Mammalia; Eutheria; Euarchontoglires; Primates; Haplorrhini; Catarrhini; Hominidae; Homo.	GO:0005737^cellular_component^cytoplasm`GO:0030027^cellular_component^lamellipodium`GO:0005634^cellular_component^nucleus`GO:0005886^cellular_component^plasma membrane`GO:0005524^molecular_function^ATP binding`GO:0004143^molecular_function^diacylglycerol kinase activity`GO:0004857^molecular_function^enzyme inhibitor activity`GO:0001727^molecular_function^lipid kinase activity`GO:0046872^molecular…	MSVFECLLTCVIYTHELLPGVVRSFYPPQSFPPGVEMAAAAAVEPPEESSDMKEDALTGDFEEEEEEEEEEKTRPEQTPCQALKDEVDLKQDSPSSQKLSSKWCFLDCTTADRFYRIDRAQEHLNYVTEISLEELYILDPELVVKETVGTSPSMPDLVDSEEQQEQFAFPSSPPSPTSASRMVDCQRRRISSDSAMSSVLTPTSPKVPLCRRGAKIINVHRSNTTLAAFSSVIRSSTATSQDAKEDGELISSIKDKNLSKLKELHQQGADLLLQDPDGCTLLHHAVEAGDKDIVKYLIENVPTSHLDAADTESGATVLHKAAASCQRSICHFLVEAGASLMKTDLQGETAKDRAAKSNDQDLAAYLESRQHYQMIQREDQETAV*	TTTTGGGCTTTGCTCAGACAGCTGCTGCTGCTGCGGCGCTTTATTGCAGGTTTTTCAGAAAAGGTGAAACCAAACAACTGCAACAAGTAAAACCAAGCAGGGATGATAATCTCATCCCGGCGCTGCAGAAGCTCACTGCTCGTCGCTTTGGCAAAACCTCTTCAAACACGGAGTCGCAGATATTTACAGGCCACAACGAAAGCGTCCCGCACGGCTGTGGGACTCCAGACAGGAGGGACTCTTCTAGGCGTCTGTCCGGAAGCAGCGCGATTATCTCTACGCACCGATCATAAATACCTTAACTCATCACTGCTTATGTTAAATACGCAACACTCGTCTCTGAGCAGAACACGAACACGTCAGAGGTCACAGAAGCTCCACAGAAGAGGCATTTGCAGC…
Q9Y3C5	10.343	2.0189	7.93261e-05	sp|Q9Y3C5|RNF11_HUMAN`Q9Y3C5`Q:1-154,H:1-154`90.26%ID`E:8e-80`RecName: Full=RING finger protein 11;`Eukaryota; Metazoa; Chordata; Craniata; Vertebrata; Euteleostomi; Mammalia; Eutheria; Euarchontoglires; Primates; Haplorrhini; Catarrhini; Hominidae; Homo.	GO:0005769^cellular_component^early endosome`GO:0005634^cellular_component^nucleus`GO:0055037^cellular_component^recycling endosome`GO:0000151^cellular_component^ubiquitin ligase complex`GO:0003677^molecular_function^DNA binding`GO:0046872^molecular_function^metal ion binding`GO:0008270^molecular_function^zinc ion binding`GO:0042787^biological_process^protein ubiquitination involved in ubiquitin-…	MGNCLKSPTSDDISLLHDSQSDRASFGDGMDPDLEPPPPYQEQAHMPTYHPTPSQARLATQLTEEEQIRIAQRIGLIQHLPKGVYDGGQDGSEKKIRECVICMLDFVYGDPIRFLPCMHIYHMDCIDDWLMRSFTCPSCMEPVDAALLSTYETN*	AAAAAAGTTTTTTTTTTTTTTTTTACTGTTACACCATCAAAGAAATCTTTCACAACTGGGACAGAGGTTTGCACAACTCAATACCAGTGTTTTAGAAATCCAGTTAACAAACCAAACGCGAAATGAACACAAACATAACACAAAATATCACAACAAAAACACAAATCAAAGGGAATGGTTGTAACTACTGCTACAGCTGAATTCATTTCTATTAACTAATAAAAAGACCATTTCTATGTTTAAATTTAAAATGGCAAAAACTAAATAAACATCATCAAAACGAAGAAAAGAATGTGTCCAGGCATTTGTGATTACCACCCGTTTATTTACTGCTACATTATTATATTTACCCCGTTTACGTGACACCTTTGACATATTTGCTTCAGAGACGTCCTGGCG…
O13166	10.3336	2.00953	8.05469e-07	sp|O13166|TLE2_DANRE`O13166`Q:1-755,H:1-761`92.29%ID`E:0`RecName: Full=Protein groucho-2; AltName: Full=Groucho-related Grg2;`Eukaryota; Metazoa; Chordata; Craniata; Vertebrata; Euteleostomi; Actinopterygii; Neopterygii; Teleostei; Ostariophysi; Cypriniformes; Cyprinidae; Danio.	GO:0005634^cellular_component^nucleus`GO:0006355^biological_process^regulation of transcription, DNA-dependent	MYPQGRHPAPHQPGQPGFKFTVAESCDRIKDEFQFLQAQYHSLKVEYDKLANEKTEMQRHYVMYYEMSYGLNIEMHKQTEIAKRLNAILAQIMPFLSQEHQQQVAQAVERAKQVTMTELNAIIGQQQLQAQHLSHAAHGPPVQLPPHPSGLQPPGIPPVTGSGSGLLALGALGSQAHLPVKDEKNHHDLEHSRENTNNSISPSESLRTSSEKHRSSSDYSLDSKKRKVEEKDSVSRYDSDGEKSDDLVVDVSNEDPATPRASPAHSPPENGIDKPRPPKKDTPNSPASVASSGSTPSSKAKELSHNDKSSTPGLKSNTPTPRNDAPTPGTSSTPGLRPILGKPPGMEALAAPALRTPLSYPTPFAMMGHHEMNGGLTSPGVYAGLHISPQMSAAAAAAY…	TTCCTGAAAGAACTTTATTTACAGGTTCATATATAGCAAGGATCACGATGGTAGTTAAGAAAATCCCAGTCACTCCGTCTATATGTGCCCTAACGAAAAAGAAAAGAAAAAACAAATTTGAGCTTTAAAGGTCAACTGAATGCAGCAGAAGTCTGACCACTTTTCTTCCTAAACTGAATTCCACTTCCTGGTTCCTGAAAATCTGTCATTTTTAAGAAGAACTTGTGGCCGCACATCTGAGGAAACCCGGTCCGGTTCTGTCGGGACGCACAAATGATACAATCATGGTGCTGCTGAAGCGGAGCGTCGAACCGGGTCGAGGTCGGACCGGGTCGAGACCGGCCCGTGCCTTCATGCTCCTCCGACGCTCTGAGAATCCAGCTGTTTGCAACATATTCA…
Q99504	10.3066	1.98393	8.2454e-05	sp|Q99504|EYA3_HUMAN`Q99504`Q:121-580,H:105-573`60.67%ID`E:2e-163`RecName: Full=Eyes absent homolog 3; EC=3.1.3.48;`Eukaryota; Metazoa; Chordata; Craniata; Vertebrata; Euteleostomi; Mammalia; Eutheria; Euarchontoglires; Primates; Haplorrhini; Catarrhini; Hominidae; Homo.	GO:0005737^cellular_component^cytoplasm`GO:0005634^cellular_component^nucleus`GO:0005667^cellular_component^transcription factor complex`GO:0003682^molecular_function^chromatin binding`GO:0046872^molecular_function^metal ion binding`GO:0004725^molecular_function^protein tyrosine phosphatase activity`GO:0008138^molecular_function^protein tyrosine/serine/threonine phosphatase activity`GO:0009653^bi…	GRPAAEMDEEQPAKKVKVERDGGNSREQSHLGAGGSPPAALPSSERAGSFGLETGEQKLSSSDGAAANQACSDGGNSFAHAGSESAAASDYNQQGYPASSPAVTSFSSQVAFPPLSQSSVYSGFPQSGQTYGLPPFGALWPGIKTETGLPEAPSGGQPGFLSFSTAYTSTQPGALHYSYPSQGSSFTTSSVYSNIPSAVAVTAPTTAASLQEFSSFSTLGQNQFSQYYTSPPAHEHGASVAGYSEVKSEEAASAGLPPRDASPLESVPAAAALPAGGRDQAELARRNSLGKAKGKNKKSESSPPPNSDLERIFLWDLDETIIIFHSMLTGSYAQKFGKDPAPVLNLGLQMEELIFELADTHLFFNDLEECDQVHIEDVASDDTGQDLSNYNFLADGFNG…	GCGGGACTTTACATTCTTGGCCTCTTGGTCAAGATCATCTACTACAAGTTCTTCCATCCTAAACTAAGCCGAGACGACTTGAGGAGGGACCAAGATGAAGTAGATGGAAACATCCTTATGAGGGCATCGGTTCCTGATTTAACTCCTGCACCACTAAGTGGGTTGTACCAACCGGAATCCATCGCCATGAGGGCATTCCCTCCTGCTGCACCTCCTCTAACACAGCATGGAAACAAAAGAATGAGGAAGCTCGCAGAGAACTTCTACTCTTGAGGTGGACATCATACAGAGTTGTCAGACTGATCCCTCTGGAAATATTCACAGTGGAGCACCTTTATTTTAAAAATCCTTATTCCTTATGTGTAGAACAAAAAAAGCAGAATTTTCTGCAAAAATGCA…
Q4ADV7	10.1897	1.88556	9.12193e-05	sp|Q4ADV7|RIC1_HUMAN`Q4ADV7`Q:1-1439,H:1-1423`69.1%ID`E:0`RecName: Full=Protein RIC1 homolog; AltName: Full=Connexin-43-interacting protein of 150 kDa;`Eukaryota; Metazoa; Chordata; Craniata; Vertebrata; Euteleostomi; Mammalia; Eutheria; Euarchontoglires; Primates; Haplorrhini; Catarrhini; Hominidae; Homo.	GO:0016021^cellular_component^integral to membrane	MYFLTGWPRRLLCPLKSEEEPFHIQPSSQRFYFALVSETQISIWFSRPSVLIVSYIESVKAAAQFGFYQKAEWKPDDSMIAVATAKGYILLFDVLGGGDEKYLYEPVYPKGSPRVKVTPGYKEEQCAPALSLEMKKPVDLEAPITSLQSLQENLLVCTADGYLHVLHWDGQGSNGRKAICLTTIPFSLDLQSARAGPALDLEGVYICCMEYCVTLDGFAVVLSDGRLGFITPLSNTIIADQLQGVWAADVSDGTCVAVNNKYRLMAFGCASGSVLVYMIDTTTGSMQLSHKLELTPKHYPDIYNKTGAVKVICWSPDCSVAMVTWECGGLSLWSVFGAHLICTLGEDFAHRSDGTKKEPLRISSMSWGAEGYHLWVLPSNQGRRRKEEHSMEEDSPPHP…	ATTGGTTTTTTATGTACAGGGAAAAAATGAAGTAGAAAACGAAATGAGTAGAAAAGGCAAATGTACAAGAGAGTAGCTTTACACTGCATTGAGGATGCCTGCCGAGTACACAGGCAATACTTTAACATTGTACACATCAGGGGCGGAGCACCACGATGCTCTCCTGACTCCCCCCCCCCGCAGAGAAAGATCCACATTATTCATTTCCGTAGGAAACTGTCTCGTATGCCATGAGCATAAGTTCAGAAGGAGGGCCAGGTTTTTGTTCTCTCCGACTTCAGTCGCAGCCATGAGTTTCAACAGAAAGGCCTCTGGACGTTTACGTCTTTGGTTCGTCAAGTTACCGTTTTCAAGTCAAGTAAAGCTCGCCGTGGAGCAGCGCGGTCAAGCTGCGGGCTT…
Q3ZCD2	10.1886	1.86806	5.30847e-10	sp|Q3ZCD2|TMM54_BOVIN`Q3ZCD2`Q:14-217,H:14-210`35.78%ID`E:9e-29`RecName: Full=Transmembrane protein 54;`Eukaryota; Metazoa; Chordata; Craniata; Vertebrata; Euteleostomi; Mammalia; Eutheria; Laurasiatheria; Cetartiodactyla; Ruminantia; Pecora; Bovidae; Bovinae; Bos.	GO:0016021^cellular_component^integral to membrane	MASTGICCASLKDNKALMKMGLALVLVGHVNFLLGGLVHGAVLRHINVHKQARTMEYAVSNVIAIVAGLVGIISGITAIVLSKNKRNRTLMWVLLILSFLAGLLGFASALGLSVSFIKSIALDGRSLLTHCNFSNLTTSSITHQCPFDPTRVWGTTLGLWVPLIIMTTVEMVFSFRSFAVCASFLYLCPCRKKPLNARRVRIETPVQASPTPADDGDAEEPAEHNELLSSP*	GGGCTGCCAGTTTGAGACCCCACATCTACACCAACAAAAATCACGTAAGGTTTCCATTTAAAATTTAATTTTTATATCAAAATCAATTCAAAGCTTTTCTCTCTTAAAATGAACAAATATTCAAGTTAGCTTGTTTCTTGTAACTTAGTAACTTGCTTCCATTATTAACAGTTTTACAACCAAAAACATAAAACTTTCAGATTTTTTTATAGAAAACTAACATAGGAAGGTACTTCAAAATTGCATAAGATGTTAAAGACTACGGTCACATTCCTATATTTTCCTAAGTTATTCACCAAATTAAGCGGGGGTTGTCACATTTTTACACAACGCAGAGAAAACATTTTACGATGACCAGACGATTTTTCTCTAAAAGTTGACATTGGTCAATGGCCACCA…
Q5RB83	10.124	1.80557	7.00232e-12	sp|Q5RB83|SERB_PONAB`Q5RB83`Q:32-256,H:1-225`70.67%ID`E:6e-93`RecName: Full=Phosphoserine phosphatase; Short=PSP; Short=PSPase; EC=3.1.3.3; AltName: Full=O-phosphoserine phosphohydrolase;`Eukaryota; Metazoa; Chordata; Craniata; Vertebrata; Euteleostomi; Mammalia; Eutheria; Euarchontoglires; Primates; Haplorrhini; Catarrhini; Hominidae; Pongo.	GO:0005509^molecular_function^calcium ion binding`GO:0000287^molecular_function^magnesium ion binding`GO:0004647^molecular_function^phosphoserine phosphatase activity`GO:0006564^biological_process^L-serine biosynthetic process`GO:0006563^biological_process^L-serine metabolic process	VIHQSGSVRVLLHVPCQLTVFCDSENSFPSMMTTLDQTKELFRRADAVCFDVDSTVIKEEGIDELAKFCGVGDTVREMTRKAMGGSVTFKKALTDRLSTIRCSREQVNKLITDHPPQLTPGIRELVDRLHALNIKVFLVSGGFRCIVEHVAAQLNIPLQHVYANRLKFYFNGEYAGFDETQPTAESGGKGKVISMLKEQHGFKTVVMIGDGATDLEACPPASAFIGFGGNVVRPQVKERSLWFVTSFGELLKELEKI*	GTGATCCATCAAAGCGGTTCGGTGCGGGTTCTGCTGCATGTTCCCTGTCAGCTCACCGTGTTCTGTGACTCTGAGAACTCTTTTCCCAGCATGATGACAACTCTTGATCAAACCAAGGAACTGTTCAGGAGAGCAGATGCGGTCTGCTTCGACGTGGACAGCACAGTCATCAAAGAAGAAGGCATCGATGAACTTGCCAAGTTCTGCGGCGTTGGGGACACCGTCAGAGAGATGACTCGGAAAGCCATGGGGGGCTCGGTGACATTCAAGAAGGCCCTCACGGACCGCCTGTCCACCATCCGATGTTCCAGAGAGCAAGTAAACAAACTGATAACCGACCACCCGCCTCAGCTGACTCCAGGCATCAGGGAGCTCGTGGACCGTCTGCATGCGCTCAAC…
P05153	9.97202	1.92524	1.13934e-06	sp|P05153|PCKGC_CHICK`P05153`Q:1-624,H:1-622`75.64%ID`E:0`RecName: Full=Phosphoenolpyruvate carboxykinase, cytosolic [GTP]; Short=PEPCK-C; EC=4.1.1.32; AltName: Full=Phosphoenolpyruvate carboxylase;`Eukaryota; Metazoa; Chordata; Craniata; Vertebrata; Euteleostomi; Archosauria; Dinosauria; Saurischia; Theropoda; Coelurosauria; Aves; Neognathae; Galliformes; Phasianidae; Phasianinae; Gallus.	GO:0005829^cellular_component^cytosol`GO:0005525^molecular_function^GTP binding`GO:0046872^molecular_function^metal ion binding`GO:0004613^molecular_function^phosphoenolpyruvate carboxykinase (GTP) activity`GO:0006094^biological_process^gluconeogenesis`GO:0044281^biological_process^small molecule metabolic process	MPPQIQSQNQCGIRILQGDFSSLSPAVREFVEANVALCQPESLHICDGSDEENRAILIQLQEQGMIKKLSKYENCWLARTDPRDVARVESKTVIVTQNQRDTVPSPLDGGVSQLGRWMSPEEFDKAMGSRFPGCMKGRTMYVIPYSMGPVGSPLSKIGVELTDSPYVVASMRVMTRMGKAVLSALGSGEFVRCLHSVGCPLPLKKPLVNNWPCNPEQTLIAHIPDRRQIISFGSGYGGNSLLGKKCFALRIASRIAKEEGWLAEHMLILGITNPAGEKKYMAAAFPSACGKTNLAMLCPTLPGWKVECVGDDIAWMKFDKNGNLRAINPENGFFGVAPGTSVKTNPNAMATITKNTIFTNVAETSDGGVFWEGMDQTLPEGVTVTSWKNQTWTPKDGEP…	GTGACAGGAACAAAATAAAGAATTCAGTTCAAAATGGAACTGAGTTCACCCGGATACTCCATGCCATATGCACGTGCATTTGCAGTAAGTTAAATTTAAATACTATTGAAACGATGAGCAGAGTAATACATTGAAAAAGGCTGCAGCTATAACTGCAACGGTTTAAACATTCCCTACTACAACTGTCTTTCTCTGAGTCATGAGGCGACTTAGATTAATGCCTAATTATTGTGGAAATTTTTGACAATCCAATTCTTGAGAGAAGCACTTTAATAGGTTAATTCTTGGTAAAGCTATGACTTTTTTTTTTTTTTTTTCCCCAATACAGTTAAGGTCGTCTCACATCTGCTTCACCCTCTGTTGCAAGAGCTCCAGCTGCCGGGCCATCTCATTGGGCAG…
Q6DGR4	9.96925	1.65503	3.22108e-12	sp|Q6DGR4|F203A_DANRE`Q6DGR4`Q:1-361,H:1-362`73.76%ID`E:2e-148`RecName: Full=Protein FAM203A; AltName: Full=Brain protein 16;`Eukaryota; Metazoa; Chordata; Craniata; Vertebrata; Euteleostomi; Actinopterygii; Neopterygii; Teleostei; Ostariophysi; Cypriniformes; Cyprinidae; Danio.	.	MLSDGEAAELLSFLTPSTRPDVKAKATEYILGLSASREGCCFLRSKPDMVGALFALTSDPSVAIAKDCYHILINLSADETLHQVLVSAVEVLPVLLKKLLDPDYLFSDQISTILSNLTRHEKTCRTVFKTLQEDVGLDKLVEIFCTEGFNAKAKLHYLGPLLSNLTQLPEARNTLMDKDRCVFQRLLPFTQYQASVVRRGGVVGTLRNCCFDHTHHLWLLSDAVDILPFLLLPLAGPEELTEEENDGLPVDLQYLPEDKKREEDPDIRKMLLEALLLLTATKAGRKALKDKKVYPIMREFHRWETDVHVAAACEKLIQVLIGEEPEPGMENLMEVQIPEDVEKKLKEMDAREQEELENEERRRCEEES*	CATGTGTTTCCTGCTGTGGCCACTAGAGGGCGACAATCGCGCTGGAGGACGTGAGACTCCAACAGAAGAAGAAACCCGGAAGTTGGAGAGCGTCCGCGCGCACGTGAGCTTGTTGAAAACAGCGCGTCTGTCAGAGCTGCTGGAAGAAGATGCTGAGCGATGGAGAAGCTGCAGAGCTGCTGTCCTTCCTGACCCCCAGCACCCGCCCTGACGTGAAGGCCAAGGCCACCGAGTACATCCTGGGACTGTCAGCCAGCAGGGAAGGATGCTGCTTCCTACGCTCCAAACCGGACATGGTCGGCGCCCTGTTTGCGCTGACCTCTGACCCGTCTGTCGCCATAGCGAAGGACTGCTACCACATCCTCATCAACCTGTCAGCGGACGAGACTCTGCATCAGG…
Q66HX8	9.94984	3.47074	1.60102e-18	sp|Q66HX8|GDAP2_DANRE`Q66HX8`Q:1-495,H:1-504`75.79%ID`E:0`RecName: Full=Ganglioside-induced differentiation-associated protein 2;`Eukaryota; Metazoa; Chordata; Craniata; Vertebrata; Euteleostomi; Actinopterygii; Neopterygii; Teleostei; Ostariophysi; Cypriniformes; Cyprinidae; Danio.	.	MDPLGARSRFVDIQTLPTWPQQLGDEGGETRQDRSDSLLSQQAFPSPFPVRAEINRKIILFVGDVAQLNCTAIVNTSNESLNDKNPVSDSIHQLAGGELREELHKLKGCRTGEAKLTKGFNLAARFIIHTVGPKYKSKYRTAAESSLYSCYRNIMQLAVEQAMMSVGFCVVTTAKRGYPLEDATHIAFRTVRRFLENHGNGIEAVVFAVTETEESVYRKLLPLYFPRSEEEERACLPLLPADIGNSEGEPIVPERQIRIAEKPGILEDDSEDDGTELDLAQVGNHAFARMEGDVDKQRKQILQGHMSEAAVQKQHQRNYSRWLNRARAEDLSDIAALKALYQTGVDKCGRTVVVVVGRNIPVTLIDLEKALLYFIHVLDHIAVKDYVMVYFHTLTGEHN…	GACAGGCAAAGAAAAGCATTTTAATCAAAGTAAAAAAGAAATCTGAAGTTCTGAATAAAAATATTCACAAGATTAAAATTATACACATAAAAGGATTATATACATTTTCACATAATCAAGATTAGTCTCATTTTTACAGATTGTGATCACAGTTTGAACAGACACGTCACTTCCTGCTTCAGCTGGTCTCATGTTTCCATTCCTGCACAAACATGTCAGAAACTCATTAGAATGAAGCGTCTTAAAAACCATAAACTCTTAGCACAAATGAGCTCTTTAAAAATGTTCATATTCCTTCACACTGGCTTCTTGAATTTGATTGTTCCATTTGAAACCAAAAGGTTTAGGAAAAATGAAGATGACTTTTCTGACTGAGGCCTTGAAGGTTCAACTGCATTA…
P0CG11	9.94828	1.63455	1.10666e-06	sp|P0CG11|CTF8_BOVIN`P0CG11`Q:1-126,H:1-121`63.49%ID`E:5e-39`RecName: Full=Chromosome transmission fidelity protein 8 homolog;`Eukaryota; Metazoa; Chordata; Craniata; Vertebrata; Euteleostomi; Mammalia; Eutheria; Laurasiatheria; Cetartiodactyla; Ruminantia; Pecora; Bovidae; Bovinae; Bos.	GO:0005634^cellular_component^nucleus`GO:0003677^molecular_function^DNA binding`GO:0007049^biological_process^cell cycle`GO:0006260^biological_process^DNA replication	MVQIFVRSSVEAGGPSEWLLVELQGEMVSRHNSGLAGNVMGDLMYTKEGVPVLIVGHHILYGKQVKLDKPFAVLMKHSGHSQDSHDDAMEMDRQDPTSYSVKALIKRKLIFKTRPKPIITNVPKKV*	TGGTAGGTAGATTATTTTATTATTTATTTGGATGTTATTAGAGATCAAACATGTGAATTATTAGAGAAATCCTGTCAGAGGTTGTCGGTTCAGTCCATCTACGTTTGTGGTTCAAAACAAAAACTATTTCTTTGCTGATTAATTAATGTGAGTTTTATTTACAGAATTATTCAGATGATCAACAGACGATTGTTCATAAATATGTCAGACTCATTTCTGATGCAGGAACCAAAGTGAGCCTCATTCTGAAAGAACATTTACAACATCTGAACAAAGAGATGAACCTCTGTCAGCCTCAGAGATTCCTCAGCAGAACCGAACCACTCACTGCTGTGAGATTGGATCTGATCCGCATCAGTCTGGTACGAGGTCCTGCTACACCTTTTTGGGCACGTTTGT…
Q99504	9.92527	2.57517	6.06192e-07	sp|Q99504|EYA3_HUMAN`Q99504`Q:121-580,H:105-573`60.67%ID`E:2e-163`RecName: Full=Eyes absent homolog 3; EC=3.1.3.48;`Eukaryota; Metazoa; Chordata; Craniata; Vertebrata; Euteleostomi; Mammalia; Eutheria; Euarchontoglires; Primates; Haplorrhini; Catarrhini; Hominidae; Homo.	GO:0005737^cellular_component^cytoplasm`GO:0005634^cellular_component^nucleus`GO:0005667^cellular_component^transcription factor complex`GO:0003682^molecular_function^chromatin binding`GO:0046872^molecular_function^metal ion binding`GO:0004725^molecular_function^protein tyrosine phosphatase activity`GO:0008138^molecular_function^protein tyrosine/serine/threonine phosphatase activity`GO:0009653^bi…	GRPAAEMDEEQPAKKVKVERDGGNSREQSHLGAGGSPPAALPSSERAGSFGLETGEQKLSSSDGAAANQACSDGGNSFAHAGSESAAASDYNQQGYPASSPAVTSFSSQVAFPPLSQSSVYSGFPQSGQTYGLPPFGALWPGIKTETGLPEAPSGGQPGFLSFSTAYTSTQPGALHYSYPSQGSSFTTSSVYSNIPSAVAVTAPTTAASLQEFSSFSTLGQNQFSQYYTSPPAHEHGASVAGYSEVKSEEAASAGLPPRDASPLESVPAAAALPAGGRDQAELARRNSLGKAKGKNKKSESSPPPNSDLERIFLWDLDETIIIFHSMLTGSYAQKFGKDPAPVLNLGLQMEELIFELADTHLFFNDLEECDQVHIEDVASDDTGQDLSNYNFLADGFNG…	GCGGGACTTTACATTCTTGGCCTCTTGGTCAAGATCATCTACTACAAGTTCTTCCATCCTAAACTAAGCCGAGACGACTTGAGGAGGGACCAAGATGAAGTAGATGGAAACATCCTTATGAGGGCATCGGTTCCTGATTTAACTCCTGCACCACTAAGTGGGTTGTACCAACCGGAATCCATCGCCATGAGGGCATTCCCTCCTGCTGCACCTCCTCTAACACAGCATGGAAACAAAAGAATGAGGAAGCTCGCAGAGAACTTCTACTCTTGAGGTGGACATCATACAGAGTTGTCAGACTGATCCCTCTGGAAATATTCACAGTGGAGCACCTTTATTTTAAAAATCCTTATTCCTTATGTGTAGAACAAAAAAAGCAGAATTTTCTGCAAAAATGCA…
Q28IK8	9.90276	1.82389	4.56946e-11	sp|Q28IK8|MARH8_XENTR`Q28IK8`Q:4-263,H:1-264`82.2%ID`E:2e-125`RecName: Full=E3 ubiquitin-protein ligase MARCH8; EC=6.3.2.-; AltName: Full=Membrane-associated RING finger protein 8; AltName: Full=Membrane-associated RING-CH protein VIII; Short=MARCH-VIII;`Eukaryota; Metazoa; Chordata; Craniata; Vertebrata; Euteleostomi; Amphibia; Batrachia; Anura; Pipoidea; Pipidae; Xenopodinae; Xenopus; Silurana.	GO:0030659^cellular_component^cytoplasmic vesicle membrane`GO:0031901^cellular_component^early endosome membrane`GO:0005768^cellular_component^endosome`GO:0016021^cellular_component^integral to membrane`GO:0005765^cellular_component^lysosomal membrane`GO:0005764^cellular_component^lysosome`GO:0046872^molecular_function^metal ion binding`GO:0004842^molecular_function^ubiquitin-protein ligase activ…	DPAMNSCWKMKIQNEKPLGHSASRSSNISKAGSPTSVNAPCSFSRTSVSPSSQDICRICHCEGDEESPLITPCHCTGSLRFVHQGCLQQWIKSSDTRCCELCKYEFIMETKLKPLRKWEKLQMTASERRKIMCSVTFHIIAITCVVWSLYVLIDRTADEIRSGILEWPFWTKLVVVAIGFTGGLVFMYVQCKVYIHLWKRLKAYNRVIYVQNRPDTCKKLALEKPPLLEPNPENKEMLAHTQSDTNSSQYTETEDYSMEVLHV*	GGATCCAGCCATGAATTCCTGTTGGAAGATGAAGATTCAGAATGAAAAGCCTCTGGGTCACTCAGCAAGCAGATCCAGCAATATATCAAAGGCGGGAAGTCCAACTTCAGTCAACGCTCCATGCAGTTTCTCAAGGACGTCGGTTTCTCCCTCTAGCCAAGACATCTGCAGGATTTGTCACTGTGAAGGGGATGAGGAGAGTCCTCTGATCACGCCGTGCCACTGCACAGGGAGCCTGCGCTTTGTCCACCAGGGCTGTTTGCAGCAGTGGATCAAGAGTTCGGACACCCGCTGCTGTGAACTCTGCAAGTACGAGTTCATCATGGAGACCAAGCTCAAACCACTGCGCAAGTGGGAGAAACTACAGATGACAGCCAGCGAGAGAAGGAAGATCATGTG…
Q4R4Q3	9.85319	1.54244	1.28632e-06	sp|Q4R4Q3|NDRG1_MACFA`Q4R4Q3`Q:1-395,H:5-394`69.44%ID`E:2e-164`RecName: Full=Protein NDRG1; AltName: Full=N-myc downstream-regulated gene 1 protein;`Eukaryota; Metazoa; Chordata; Craniata; Vertebrata; Euteleostomi; Mammalia; Eutheria; Euarchontoglires; Primates; Haplorrhini; Catarrhini; Cercopithecidae; Cercopithecinae; Macaca.	GO:0005829^cellular_component^cytosol`GO:0005874^cellular_component^microtubule`GO:0005815^cellular_component^microtubule organizing center`GO:0005634^cellular_component^nucleus`GO:0005886^cellular_component^plasma membrane	MDDIQVVESKPLLVDRELPGLREAVQQLVVKEHDVETPYGRIHCTMKGVPKSERPVILTYHDIGLNHKTCWDTLFNHEDMSEIMQHFAVCHVDAPGQHEGANTFSTGYEYPSMDQLSETLPLVLKHFGLKSVVGMGIGAGAYILTRFALNCPSMVEGLVLININPCAEGWMDWAAHKISGWTHAMTDMVITHLFGKEEINHNPDLIAKYRNHIINDMNQFNLHLFVKAYESRRDLEIERPVPGGNARTLKCPSLLVVGDSSPAVDAVVECNTKLDPTKATLLKMADCGGMPQVDQPGKLTEAFKYFIQGMGYMPSASMTRLARSRTASGSSITSFEGNRSRSHTHEGNRSRSHTNEGNRSRSHTADARAHADGAADGAATNNMDQAVPKSTEVSC*	ATCTGTTACAGGTTTTTATTGTTTTTTTTTAATAAATACAAACGTATGCCATTTTTTTATGCATTTCTACAGCATTAGATGGTTTGTGCATTGCATCTTTACAAAGCTGTGAGTCTTCTATAAAGTAGAACATCGCTGTAGTGCAAGTAAATTAGTGGAGTAAAATATGTCAGGTGAAGTTCTAGGGCTAATCCTCATGTTAGCATGTGGACTTCCTGTCTCTGCACTCACCTCACAAATCCACAACCATAAAAGGAGCGTCACGTTTTGGAAAAAGTGAACAATTCCATGGCACTTTTTTTTTCCTTTGTTCCATTTCACTTGATTGCATCAGAAAAAAAAAATGAAGCCATAACATGCAAAAGCTTTCAAATTTATCTTAGGGCATAATCTGATTGA…
P27628	9.84827	1.53778	1.69638e-06	sp|P27628|TUFT1_BOVIN`P27628`Q:82-340,H:76-348`34.89%ID`E:2e-34`RecName: Full=Tuftelin; AltName: Full=Enamelin;`Eukaryota; Metazoa; Chordata; Craniata; Vertebrata; Euteleostomi; Mammalia; Eutheria; Laurasiatheria; Cetartiodactyla; Ruminantia; Pecora; Bovidae; Bovinae; Bos.	GO:0005576^cellular_component^extracellular region`GO:0031214^biological_process^biomineral tissue development	YDKKMNGGGSLSADRGGQDGTGTRTGTGGGPVKLRLPQQTQELPLRSSDPLRSKKQESSIAVVLPQTVQNQNGRGPAEENTEVIKVYLESRLRSPGSVRMLTDEVSQIQEVRYCLKTLREQMAARQNNNNNNKFPANGLRLTPGDPPAAPDSLDSNVSVGDDQQESSRLREVTRRLYARLKEAESRHQEEKDRLQAESSELRDLLAERSERLQKAEQTSREKQQRVEELQTLLHSTQQESSHLKDKVAEKEAELLKLKTSEEEQRCAELEKELSVLKEKNHHLDDMLKSHQRKVRSMIEQVQNSKMLLQDRDQVIRDLEERVAFLDAENRELHDHMDFFLNGHEAPPSSDGKPDVVYSKPLTPTAHGSKPLPYIKVIEIQP*	TTTACGATAAGAAGATGAACGGCGGCGGGAGTCTGTCAGCGGACCGCGGAGGACAGGACGGAACCGGAACCAGAACCGGGACCGGCGGAGGACCTGTTAAGCTCCGCCTCCCTCAGCAGACTCAGGAACTGCCTCTCCGCAGCTCCGACCCGCTCAGAAGCAAGAAACAGGAGAGCAGCATCGCCGTCGTTCTTCCTCAGACCGTCCAGAACCAGAACGGCCGCGGTCCTGCAGAGGAAAACACTGAAGTCATTAAGGTCTACCTGGAGTCCAGACTCAGGAGTCCTGGGAGCGTCAGGATGCTGACCGATGAGGTGTCGCAGATTCAGGAGGTCAGGTACTGTCTGAAGACTCTGAGGGAGCAGATGGCCGCCAGACAAAACAACAACAACAACAACA…
Q9JKB5	9.62161	1.31895	2.75415e-06	sp|Q9JKB5|ARI4B_RAT`Q9JKB5`Q:1-270,H:1-269`72.96%ID`E:1e-105`RecName: Full=AT-rich interactive domain-containing protein 4B; Short=ARID domain-containing protein 4B; AltName: Full=180 kDa Sin3-associated polypeptide; Short=Sin3-associated polypeptide p180; AltName: Full=Histone deacetylase complex subunit SAP180; AltName: Full=Retinoblastoma-binding protein 1-like 1;`Eukaryota; Metazoa; Chordata;…	GO:0005634^cellular_component^nucleus`GO:0003677^molecular_function^DNA binding`GO:0006355^biological_process^regulation of transcription, DNA-dependent`GO:0006351^biological_process^transcription, DNA-dependent	MKTLEEPPYLTVGTDVSAKYRGAFCEAKIKTAKRLVKAKVTFKSDLTTAEVHDENIKGPLKVGAVVEVKNQDGVYQEATINKLTDASIYTVVFDDGDEKTLRRSSLCLKGARHFAESETLDRLPLTNPEHFGTPVIGKKGNRGRRSNPVQEEESSSSSSEEEDNDQRQNEDLFGKVVMVEGVTGNDKKKPSWYPALVISPDCHEDVAVKKDTILIRSFKDGKFNLVLRKDVHEINSRSPPKADTGLKPALDAALEFQEKMVVPSTWKTEVKEDSSSSEEEDEEEEEEGAVGGAVEPCAAPRCRLPQQDTVQWIQCDVCDAWYHLDCLHVDRKKLLKDPNADFHCGCR*	CTATGAGCCACTCAACAAGGCAAACAGCAGCTCTGCGAAAAGCACTTTTATCAATCCGCATCCAACATCAACCAGGGGCAAACAGACGACGCTAAAACCGGACATATTTCCTCCATAAATGTTCCTATGGATTATTAACACGCTTCTGTCGAAAAATCGAAGTTTTTCAACTTGACAGCGTCGCCTCGGATTCCTGGATCTGCTGTCGCGGAGGACTCACAGAGATGAAGACTTTGGAGGAGCCCCCCTACCTGACAGTCGGGACCGATGTGAGTGCCAAGTACAGAGGGGCTTTTTGTGAAGCTAAGATTAAGACAGCCAAGAGACTCGTCAAGGCCAAGGTGACCTTTAAATCAGATCTGACTACAGCGGAGGTCCATGATGAAAACATCAAAGGAC…
Q5TJG6	9.49291	1.1953	2.36453e-06	sp|Q5TJG6|BRD2_CANFA`Q5TJG6`Q:1-115,H:652-762`80.87%ID`E:7e-47`RecName: Full=Bromodomain-containing protein 2;`Eukaryota; Metazoa; Chordata; Craniata; Vertebrata; Euteleostomi; Mammalia; Eutheria; Laurasiatheria; Carnivora; Caniformia; Canidae; Canis.	GO:0005737^cellular_component^cytoplasm`GO:0005634^cellular_component^nucleus`GO:0003682^molecular_function^chromatin binding`GO:0070577^molecular_function^histone acetyl-lysine binding`GO:0016568^biological_process^chromatin modification`GO:0006334^biological_process^nucleosome assembly`GO:0006357^biological_process^regulation of transcription from RNA polymerase II promoter`GO:0006351^biologica…	LSLDINKLPGEKLGRVVHIIQSREPSLRDTNPEEIEIDFETLKPSTLKELERYVMTCLRKKPRKPYGEPATKKGSVGMSKEELTLEKRRELERRLQDVSGQLNSVKKPAKPKAEKPSAPEAHAQPSRLSGSSSSSDSSSSSSSSSSFSSAETSPIGSFLCSCFPIMPSSPSSASLPFPSRCSSSLTVSLF*	GTCACTTAACAACTTTTAAACTACTGCAGAGAATAAATCCTGGTTTCAACAGCAGGATAACTGGACGGTTTTCCTTCACAGGACCTGATAGTCCTGCTGACAGACCAGAGCTAGGCTGAAAACCATCTGCAGACGGTCAGAAGAGAGTTTTCTGATTCTTTTTTAGTTTTTTAACAAAACTTCAGAGAGCCAACAAAAAAGAGCAGGAAATGTCAAGAGACGAAACAAAATAGGATCAGAGTTCACATCATAGACTTAATATATAATGGTTCACATACACTTAACAAATCACACGATAAAGAGCCAGATGGTTTACCAATTATCCAGACTTCTCAAATACCATACAGCTTTTATTAGCTTTTAAATTTGCAGAATTTTTAATAGAATCAGATTTTTTCA…
O60841	9.42482	1.13387	0.00015766	sp|O60841|IF2P_HUMAN`O60841`Q:1-1175,H:1-1220`66.09%ID`E:0`RecName: Full=Eukaryotic translation initiation factor 5B; Short=eIF-5B; AltName: Full=Translation initiation factor IF-2;`Eukaryota; Metazoa; Chordata; Craniata; Vertebrata; Euteleostomi; Mammalia; Eutheria; Euarchontoglires; Primates; Haplorrhini; Catarrhini; Hominidae; Homo.	GO:0005829^cellular_component^cytosol`GO:0005525^molecular_function^GTP binding`GO:0003924^molecular_function^GTPase activity`GO:0003743^molecular_function^translation initiation factor activity`GO:0006184^biological_process^GTP catabolic process`GO:0006446^biological_process^regulation of translational initiation	MGKKQKKAGEDSAKDDGVDIDALAAEIEGAGAAKEQKGKKKKKAAKKDDFDEDDILKELEELSLETHGGKKTDATEEVEAEPPRPEKKKTRKGKKGGGSPEDEEADEANEEDKKAPPTAPPDDSDDDSSSRLKTKGAKKGAKKASVSDEEDHAEDRDAKKGAPKEDESEEDEEFASKRDKKKKNKGKAAKADSEDEEEQDEEAGGFKMKTAAQKKAEKKERDKKKKEEERMKLKKQKEKDVEAKKEPEKKPAEATPPQATAEAVAEEAEGAEPGAEDEGEGEKKKKDKKKKKGEKEEEKKKKGPSKATVKAMQEHLAKMKEEEERLKREEEERQKRLEELERQRQEQERLEQERKEKKKQKEKERKERLKKEGKLLTKSQKEAKLRAEAMLSMLQAQGV…	AGAGAAATAGAGAGTTTGTTCAACAGATGAGAGCATCTTTACCAAACACTGCTAATACACGATCTTTGTCGGACGTGAAGCGTCGTGTGCCAGCCAGCGCTGAGCGAAGTTCCAATAGAGCCGAGGTGGCACGATGGGGAAGAAACAGAAAAAAGCCGGCGAAGACAGTGCCAAAGATGACGGCGTGGACATCGACGCTTTGGCGGCAGAAATCGAGGGAGCCGGAGCTGCGAAGGAGCAGAAAGGGAAGAAGAAGAAGAAAGCGGCCAAGAAGGACGACTTTGACGAGGACGACATCCTGAAGGAGCTGGAGGAGCTCTCTTTGGAAACGCACGGAGGAAAGAAAACCGACGCCACAGAAGAGGTGGAGGCGGAGCCTCCCAGACCAGAGAAGAAGAA…
Q99996	9.40317	1.12192	5.85544e-11	sp|Q99996|AKAP9_HUMAN`Q99996`Q:47-485,H:94-484`39.03%ID`E:3e-63`RecName: Full=A-kinase anchor protein 9; Short=AKAP-9; AltName: Full=A-kinase anchor protein 350 kDa; Short=AKAP 350; Short=hgAKAP 350; AltName: Full=A-kinase anchor protein 450 kDa; Short=AKAP 450; AltName: Full=AKAP 120-like protein; AltName: Full=Centrosome- and Golgi-localized PKN-associated protein; Short=CG-NAP; AltName: Full=P…	GO:0005813^cellular_component^centrosome`GO:0005829^cellular_component^cytosol`GO:0005794^cellular_component^Golgi apparatus`GO:0000242^cellular_component^pericentriolar material`GO:0005102^molecular_function^receptor binding`GO:0000086^biological_process^G2/M transition of mitotic cell cycle`GO:0007165^biological_process^signal transduction`GO:0007268^biological_process^synaptic transmission`GO:…	KKKKKKKADEDSGGDSHGRVEDELDRSVEGQEVTGGGNTDQPTTQFSFTKTLRSGETVRHDQTYKIEPESEVSTTAEDYSSEEEVEYLQQLTEGQALANMEDARAARTQTEEELTRELDHLKAAFGAEGVQQLQDFEAALKQRDGIITQLTSNLQQAREEKDEIMKEFLALTDESQKLRLQFQQLQAGETLRNTSHSSTAADLFQARQQLLQNQQQLEERAAEVREQQELIRQLEQRLSQMEMTGRRSEESFLQKIQEKEVQVAEQEKLLLSQEQWMEGLRAEKEVFTQTLAENSRLIEEQTAVITEHERSAARLREELIHAGRPADRQEEELQRVLAERDRLLAQLQMSGKQQSDLQERTTAAESELKLLLQEVEDAKSELNVCHSDLEKGQKELESC…	CCCTCTCCTGCAGGGCCTGTCTCAGCTGCAGCGTGGTGTGGCTGTGCGTGCTCTCGGAGCGCTTCAGGGCCTCCTTCAGGGCCTCCACCTCATTGCGGGAGGACGTCTGCGCTCTCAGGAGCTCCATCTCAACGCGATGCTGCTCGGCCATCTGCTGCAGTCTGGCGGCGTGCTGCAGGTGGACCTCCTGCTTCATCTGCACGATCTGCTGGCCGTGCTGCTCGTCCAGCTCCGCCCTGAGGAGCTCCAGGCTCCTGGCGTTGTCAGCCCCGCCCCCCTGATGACAGCGTTTTTGTAGGTCTTCCACCGTCCCCATCAGCTGCAGGATCTGGGTGGAGGACTCCCGCTCCTTCTCTCTGGAAGCTGCCAGCTCCTTCCTGCAGCTCTCCAGCTCCTTCT…
Q6DEF4	9.39269	1.09947	0.000161729	sp|Q6DEF4|LYSM2_DANRE`Q6DEF4`Q:1-211,H:1-207`73.36%ID`E:1e-69`RecName: Full=LysM and putative peptidoglycan-binding domain-containing protein 2;`Eukaryota; Metazoa; Chordata; Craniata; Vertebrata; Euteleostomi; Actinopterygii; Neopterygii; Teleostei; Ostariophysi; Cypriniformes; Cyprinidae; Danio.	GO:0016998^biological_process^cell wall macromolecule catabolic process	MAEFSPVLPMRDGGGRFAQPIFPRSRSGSESDSELSQSLARTKIRSYGSTASVTASLGEKYIEHRVTDSDTLQGIALKYGVTMEQIKRANKLFSNDCIFLRNSLNIPVVSEKRFVFNGLSLESPDGECETVCQEATVVTQDIEAPSPPSSPPPPEESKPAPPQPEELSAKDFLHRLDLQIKQSKQAARRLKEEEVRNNEDSYTAPDKSYQET*	AACGTTCTTACGTTTTTACGTCAACGTAGAGGATCTACAAAAAAACGAACTGTGGATGTGTGTCCTAAACATGCCTCGAGTCAGCCGGTTCGGGGGCCTCCATATGACCCGGGATGGACTTTCCTGTTGCATGAAAACCTCTGGTTGGTGTTGCTAAAGCTACCGGCGCACTAACCCGGAGTTTGGCCGAGCTTTTTATCTATTCAAGAGAAGATGGCGGAGTTCTCACCCGTGCTGCCGATGCGGGATGGGGGAGGACGATTTGCCCAGCCCATTTTCCCTCGGTCCAGGTCCGGTTCCGAGTCTGACAGCGAACTGTCCCAGAGTCTAGCCCGCACCAAAATCCGGTCTTACGGGAGCACCGCCAGCGTCACGGCCTCCCTGGGGGAGAAATACATA…
Q8BJM3	9.3691	1.07673	2.79714e-06	sp|Q8BJM3|R3HCL_MOUSE`Q8BJM3`Q:113-314,H:572-770`59.41%ID`E:2e-63`RecName: Full=R3H and coiled-coil domain-containing protein 1-like; AltName: Full=Growth inhibition and differentiation-related protein 88 homolog;`Eukaryota; Metazoa; Chordata; Craniata; Vertebrata; Euteleostomi; Mammalia; Eutheria; Euarchontoglires; Glires; Rodentia; Sciurognathi; Muroidea; Muridae; Murinae; Mus; Mus.	GO:0000166^molecular_function^nucleotide binding	MDDPAPPPGSQRAGQAPRVPKHRVPDPKDGAPEERRPKARPRYTDKARKNAKNRKDKAAGAEQPAPPAGEGHQVDPHQDAQHAAAEERVPDPEEEQQRGDSQAEETLPQEETESWDTLFNDDGDCLDPYLLEELTVNDGRKESTQDPQFGYNRMDREYEEDIDLREDELSHIVEIYDFPTDFKTEDLLKLFQCSQRGGFDIKWIDDTHALGLFSSPVAAREALRSKHPLMKIRPLHKSSPTTKAKAREVSDFLLPPKERPQTSAALARQLVIGALGVKSNLTKEQREAERRKLQEAKELKRLAARQREDAWEGK*	CAGAAAATGAAACTTTAGCTTAGGTATGACATATTTTAAATGTCAATGTGGTTTATTACGTGGGTAATTTATGTTTTGATGCAACAAGTATTTGTGCTTTTCTTAAGCACTCATGTGTAATGAACGGAGAAGATTCTTGGCGGAGTAAAGCAGTTAGCTTCTGTAGCTAGCATCGTCTTGACTGTTTGTTTCCATATGCAGATGCTTCGCTAGCATTCATCCATGGACGACCCTGCGCCCCCACCCGGCTCTCAAAGAGCCGGCCAGGCTCCGCGCGTCCCCAAACACCGGGTCCCCGACCCCAAAGACGGAGCTCCGGAGGAGCGAAGACCCAAAGCCAGGCCGCGCTACACGGACAAGGCGCGGAAAAACGCCAAGAACCGGAAGGACAAGGCTGCG…
Q6DGR4	9.28991	1.0015	1.39134e-10	sp|Q6DGR4|F203A_DANRE`Q6DGR4`Q:1-361,H:1-362`73.76%ID`E:2e-148`RecName: Full=Protein FAM203A; AltName: Full=Brain protein 16;`Eukaryota; Metazoa; Chordata; Craniata; Vertebrata; Euteleostomi; Actinopterygii; Neopterygii; Teleostei; Ostariophysi; Cypriniformes; Cyprinidae; Danio.	.	MLSDGEAAELLSFLTPSTRPDVKAKATEYILGLSASREGCCFLRSKPDMVGALFALTSDPSVAIAKDCYHILINLSADETLHQVLVSAVEVLPVLLKKLLDPDYLFSDQISTILSNLTRHEKTCRTVFKTLQEDVGLDKLVEIFCTEGFNAKAKLHYLGPLLSNLTQLPEARNTLMDKDRCVFQRLLPFTQYQASVVRRGGVVGTLRNCCFDHTHHLWLLSDAVDILPFLLLPLAGPEELTEEENDGLPVDLQYLPEDKKREEDPDIRKMLLEALLLLTATKAGRKALKDKKVYPIMREFHRWETDVHVAAACEKLIQVLIGEEPEPGMENLMEVQIPEDVEKKLKEMDAREQEELENEERRRCEEES*	GCGTCTGTCAGAGCTGCTGGAAGGTAGAGAGCTTCACCTGCGTGTTTACAGATGGTCGCAATGTTTGTGTTTGTCGCAGAATGTTTTCTGCTTCCGCCCACGCACGTGACGGGTTTCTTATCAAACAGTTTGAGGAGTTCTGTAGCGGAGCTCTGAGGTCACCGTCTGTCAGTTAACTGCAGAGAAGTTTTATTTATTTATTTTATTTGCAGATAACACCTGATAACTAGATATCCATCACATGACTTGAAGCTCCTCCCCGTGGAAGAATAAGATGCTGAGCGATGGAGAAGCTGCAGAGCTGCTGTCCTTCCTGACCCCCAGCACCCGCCCTGACGTGAAGGCCAAGGCCACCGAGTACATCCTGGGACTGTCAGCCAGCAGGGAAGGATGCTGCTT…
Q28IK8	9.28259	1.14725	2.99951e-09	sp|Q28IK8|MARH8_XENTR`Q28IK8`Q:4-268,H:1-264`82.26%ID`E:5e-126`RecName: Full=E3 ubiquitin-protein ligase MARCH8; EC=6.3.2.-; AltName: Full=Membrane-associated RING finger protein 8; AltName: Full=Membrane-associated RING-CH protein VIII; Short=MARCH-VIII;`Eukaryota; Metazoa; Chordata; Craniata; Vertebrata; Euteleostomi; Amphibia; Batrachia; Anura; Pipoidea; Pipidae; Xenopodinae; Xenopus; Silurana.	GO:0030659^cellular_component^cytoplasmic vesicle membrane`GO:0031901^cellular_component^early endosome membrane`GO:0005768^cellular_component^endosome`GO:0016021^cellular_component^integral to membrane`GO:0005765^cellular_component^lysosomal membrane`GO:0005764^cellular_component^lysosome`GO:0046872^molecular_function^metal ion binding`GO:0004842^molecular_function^ubiquitin-protein ligase activ…	DPAMNSCWKMKIQNEKPLGHSASRSSNISKAGSPTSVNAPCSFSRTSVSPSSQDICRICHCEGDEESPLITPCHCTGSLRFVHQGCLQQWIKSSDTRCCELCKYEFIMETKLKPLRKWEKLQMTASERRKIMCSVTFHIIAITCVVWSLYVLIDRTADEIRSAGRIPGILEWPFWTKLVVVAIGFTGGLVFMYVQCKVYIHLWKRLKAYNRVIYVQNRPDTCKKLALEKPPLLEPNPENKEMLAHTQSDTNSSQYTETEDYSMEVLHV*	GGATCCAGCCATGAATTCCTGTTGGAAGATGAAGATTCAGAATGAAAAGCCTCTGGGTCACTCAGCAAGCAGATCCAGCAATATATCAAAGGCGGGAAGTCCAACTTCAGTCAACGCTCCATGCAGTTTCTCAAGGACGTCGGTTTCTCCCTCTAGCCAAGACATCTGCAGGATTTGTCACTGTGAAGGGGATGAGGAGAGTCCTCTGATCACGCCGTGCCACTGCACAGGGAGCCTGCGCTTTGTCCACCAGGGCTGTTTGCAGCAGTGGATCAAGAGTTCGGACACCCGCTGCTGTGAACTCTGCAAGTACGAGTTCATCATGGAGACCAAGCTCAAACCACTGCGCAAGTGGGAGAAACTACAGATGACAGCCAGCGAGAGAAGGAAGATCATGTG…
Q9BY67	9.26213	0.996297	3.06147e-06	sp|Q9BY67|CADM1_HUMAN`Q9BY67`Q:23-416,H:35-442`64.55%ID`E:1e-133`RecName: Full=Cell adhesion molecule 1; AltName: Full=Immunoglobulin superfamily member 4; Short=IgSF4; AltName: Full=Nectin-like protein 2; Short=NECL-2; AltName: Full=Spermatogenic immunoglobulin superfamily; Short=SgIgSF; AltName: Full=Synaptic cell adhesion molecule; Short=SynCAM; AltName: Full=Tumor suppressor in lung cancer 1;…	GO:0030424^cellular_component^axon`GO:0016323^cellular_component^basolateral plasma membrane`GO:0005911^cellular_component^cell-cell junction`GO:0030425^cellular_component^dendrite`GO:0016021^cellular_component^integral to membrane`GO:0008021^cellular_component^synaptic vesicle`GO:0030165^molecular_function^PDZ domain binding`GO:0008022^molecular_function^protein C-terminus binding`GO:0042803^mol…	MAITGSGSLLISFVLSAAFLQKGAAETMTVDSQNLATDNVSVIEGETATISCRVKNNDDSVIQLLNPNRQTIYFRDVRPLKDSRFQLVNFSDNELRVSLSNVSLSDEGRYVCQLYTDPPQEAYADITVLVPPGSPVIESREDVVSEGNETELTCIAIGSKPAASIRWMKGEEELTGEMTVEEMYDRMFTVTSRVRFSVTKEDDGLPVDCIIDHPAVKDLLAERHLEVLYKPEVRIEVAYPQGLTREGDNLELTCFAEGKPHPHQINWVRVDEDVPPNAVVTGPDLYIENLNKSYNGTYRCVASNTVGEAYDDYVLYVYDAPTTTPTPTTNPVNTQDSRAGAAPQKIDHAVIGGVVAVVMFAILCALIVLGRYFARHKGTYFTHEAKGADDAADADTAII…	TTGCTTAGCTAGCTGTGCTCAGCCGCTAGCTTTGCCATTCAGCAAGCTCCGCCGCTAGCCCCGACTATCACTACAACCAATGTAGCGATGGCCGGGGCCAGATACATGGTCTGCACATCCATCTTTGCAAAAGTTCAAATGTTCGTTTTTGTGGGCCAAACGCAGACAGGATGCCGGCTCTAAGATGACATCTTAGAGATCAAGGTTTCTTCCGAATAGGAAAGAAAAATCCCGAAAATATTTCATAAATTATTTGTTCTTTAGTTTGCCAACGGTAATGTATGATCATTTATATGGATATAGTTTACTCTGAAAGGTTTAGGAAAAGCGTGGTAAAGGCCCTTTGATAGTTTTTAGACTTCACCCAATGCACAGCCCGTACCAACCCTGACATTTGCA…
Q924W7	9.18577	0.968152	0.000194302	sp|Q924W7|ST5_MOUSE`Q924W7`Q:1-1134,H:3-1134`62.34%ID`E:0`RecName: Full=Suppression of tumorigenicity 5 protein; AltName: Full=DENN domain-containing protein 2B;`Eukaryota; Metazoa; Chordata; Craniata; Vertebrata; Euteleostomi; Mammalia; Eutheria; Euarchontoglires; Glires; Rodentia; Sciurognathi; Muroidea; Muridae; Murinae; Mus; Mus.	GO:0017112^molecular_function^Rab guanyl-nucleotide exchange factor activity`GO:0070374^biological_process^positive regulation of ERK1 and ERK2 cascade	MTANKGSKAAPRSGGGKAPRDVYDRCQSTSTGPAVTPSQGQSQQPLLSDNKYFDKQSRYVRTDGRFLVRTGWSKTASLCSGSSLAGDADPQGSLAKSKSISCLDNRLSIYKPPGKGKACQDGVGVPEQKENQGDHPAGEGLNGRHLNSSSLLGASLNQGHKRTLSLTHSGAGVPPTTIRKKISEWECRRVSLPRMSLCLDERGGERVGGSEGCASLLSSPCSEKTFDFKGVRRMSTAFSECSYTGNEEEEGFSDKDGLGRFQKRKGKTEISGPFLRSLSARKETSAVLNRIQKIEQSLKENPSLPPPRYLNNCYAPDKTRQRTFVIGDDLDSTCTSKRSSICSVATEPETILVPEKFSKLRQRFSVSSTRSESPEPPTQPAPVSSPINPLPKPKRTFEY…	GGCAGAAGGACAGTAACATGGCACCTGGCACCCACAGTGAGGAGAGCTAATAACAGCATGGCAGTGACAGTCACAGGAGTGATGTGCACAGACATAATTAGGTTAGTGGCAGCATGTGGCGGCTGGTGCGACAATACTCTGCCTTTTGGGACTTTACCAGCTCTGGTTAGCGCTTTGCTGTGAGGAAGGCTGTCATTAACGTGTCAGTTGTTAAGGAAATAACACGTTAGAAAAGGAGTTAGGATGTTGTTTGGTGAGATGTGAGTCAAACATTTTTTGTTTCAAAGTATTGTGATCTTTAAAATGTTTTTGTTGGTGTGATTTGAACTTCAGGGCCACTGTACTTTAGTTTCTAAGAGCAAAGAAATCTGTTAAACATTTTCTTATGAAAAAAGCCCA…
C0HBB2	9.18249	0.899026	3.64156e-06	sp|C0HBB2|NCUG1_SALSA`C0HBB2`Q:27-414,H:6-406`54.81%ID`E:3e-118`RecName: Full=Lysosomal protein NCU-G1; Flags: Precursor;`Eukaryota; Metazoa; Chordata; Craniata; Vertebrata; Euteleostomi; Actinopterygii; Neopterygii; Teleostei; Euteleostei; Protacanthopterygii; Salmoniformes; Salmonidae; Salmoninae; Salmo.	GO:0016021^cellular_component^integral to membrane`GO:0005765^cellular_component^lysosomal membrane`GO:0005764^cellular_component^lysosome	AKGHVTRCRTVTTAMAPAVTMRSDRVFVVLLVLLFSSCQSFVGGTKEYQRKLIVSVNPNATTLPPGGDLLHVRAVGNDDTLHFLFCSQGAPTLLIVHTNSSTSSVQVNWPQFLSRNVSGGLRVEPQSSIQYSIAVVFSRLLEYDDVNDTAKPDSGFFPPYELQNFKWTRLQLFGAAALVCGKTPEFVNGSLCLKLSVFDSDGRAESWPRLLHSPNSSQLEVWLDGITTQAPNSRFLLELQAVGGDFPLSRVDVRQFIDDEFTPSIFKVSEWVSPAAGGSDVLGYVQWKPVAYRQSCPALEDATPCRYSDPQSQDANATAASSALIRAFFSAHNVTGLNVSFGLAGEPFYNSTKFLSWTVLVGVGAPPVDTFSPIVLTIMAVGLGIPVILLLLGGVFVCI…	AAAAAAATGCAACAAATCCTCCAATTTCACAAAAAATAAAGATTTAGCCGAATCTTCTGAGCTGAGAAAAAAAACAAATTCAACTTAAGCAAAACGAGAATATAGATGCGACTAAAAAAAATTATAAAATCTGGAAAATATTTCTGATTTATATACAACAAGGGTCATTAAATTCCTTATTCCTGCTTTTACGTCAGAGGATTCTTGGTACAGAATAATGTCTGGATTACTCATGAGAAAGTATAAATACAATAAATCTAGCGGCTCCTTCTCCGCTCTCTAAAACATCACTAAAAGAGTCTCTGTCACTCCGTCCGTCAGTTTATGGACTGGTAGGCCGCCGTGGCGCCTTGCCTCCTTTTATGGATGCAAACAAAGACTCCGCCCAGCAGCAGGAGG…
P38621	9.17535	0.892385	2.78667e-10	sp|P38621|ZN12_MICSA`P38621`Q:121-472,H:58-407`42.49%ID`E:3e-79`RecName: Full=Zinc finger protein ZFMSA12A;`Eukaryota; Metazoa; Chordata; Craniata; Vertebrata; Euteleostomi; Actinopterygii; Neopterygii; Teleostei; Euteleostei; Neoteleostei; Acanthomorpha; Acanthopterygii; Percomorpha; Perciformes; Percoidei; Centrarchidae; Micropterus.	GO:0005634^cellular_component^nucleus`GO:0003677^molecular_function^DNA binding`GO:0046872^molecular_function^metal ion binding`GO:0008270^molecular_function^zinc ion binding	CEVHPADEELVKVEVVKPVDEEHLEEVVVGPSSEGNEESNQRSAADTIETSLNSCKDSPGNTSVQSEDTAGDVDDSCSKVTASALQSISHNSQRVAHKCPQCGKCFIYRSQVIRHLRSNRSCSTALSSPNAAKEPRPLRKFPCFQCSLVFKAKAELLTHQRSHRARPFYRCQHCDKAFHQLSSLTNHQQIHLDETRLACSQCHKVFESAAQRDAHLTQHQLPKLDCSVCAQTFGSQALLLRHLQTHSAEGAVLRYNCLFCDQTFSGVTLLRIHQRSHTPRTYRCDQCNKSYASPTILQAHQLTHRGERHYLCPQCGKSFKTRHGLECHLRTHSGERPYCCPYCSKDFTAIAGLNVHMRRHTGERPYVCAVCGKGWPSGGDLQKHMRSHTGERPYVCQYC…	ATCTTCATCCTCACTTTATTCTACTCAGCAACAAACGGGAAAACAAACCAAAAGCTTCTCCATCTTTGGTAACACAAGGCTTTGAATTCAGTCTCTGTCGAAAACGTCGTGCTCTCTGTGTCCGTTTAAACGTCTCTCTGCTCCTCCTGACCGTCCCGGCTGGCCTCGGCGGGCCTGTGCGTCAGCAGGTGTCTGCTCAGGTGAGTCTTGCGGGTGTAGCTCTTGGGGCAGAGGGGGCAGGCGTGGGGCCGGGTGTTGCTGTGGGACAGCAAATGCTTCTTCAGGTCGAACTTCCGCCGCAGGCACTTGCCGCAGTCCGGGCACGAGTACGGCTTCTCCCCCGTGTGGATCCTGCGGTGCTCCGTCAGGTGGCAGGACATGGAGAAGCCCTTCCCGCAG…
Q92543	9.15378	0.871843	2.73561e-06	sp|Q92543|SNX19_HUMAN`Q92543`Q:1-704,H:238-963`43.35%ID`E:7e-147`RecName: Full=Sorting nexin-19;`Eukaryota; Metazoa; Chordata; Craniata; Vertebrata; Euteleostomi; Mammalia; Eutheria; Euarchontoglires; Primates; Haplorrhini; Catarrhini; Hominidae; Homo.	GO:0030659^cellular_component^cytoplasmic vesicle membrane`GO:0035091^molecular_function^phosphatidylinositol binding`GO:0007154^biological_process^cell communication`GO:0015031^biological_process^protein transport	VEELVSCSVLLPLVEKLSDPDWLNLLIIDVFGESNVPLETAAGDLASPSQHAPCAELEQGPISPPEQAANPPQVDCEAPGGGAEDGSGAAFPEVAPCDVLDSGGGEFTHSLTEDDAPPFLRHFMRGSKANPFYLENDSDLDSPLAEDKPGSIDSLLIMGRGESLFEGQQVCGPLAENSPGLELEEKITVSLELVEDPRTAGGAHSSQPDLDQAGSCAGTPHRELLLSVEQAGNELSVVSPLQGGPSMPAFSFEPLCSPEGPVLIQNLRITGTITAKEHRGTGSHPYTLYTIKYETSMACEKSGGLQSVSEDGEAPPADENLSPGQPVAYHMVNRRYSEFLNLQTRLEEKAELRRLIKGVKGPKKMFPEMPFGNMDSERIEARKGLLETFLKHLCAMPEI…	GGTGGAGGAGCTGGTCTCCTGCAGCGTCCTGCTGCCTCTGGTCGAGAAGCTGTCGGATCCCGACTGGCTCAACCTGCTCATCATTGACGTCTTCGGGGAGTCCAACGTCCCTCTGGAAACCGCTGCAGGAGATCTGGCCAGTCCTTCCCAGCATGCACCCTGTGCTGAGCTTGAGCAGGGCCCGATCTCCCCCCCTGAACAGGCAGCAAACCCCCCACAGGTGGACTGTGAGGCTCCCGGTGGTGGAGCAGAGGACGGATCCGGCGCAGCCTTTCCTGAGGTGGCGCCGTGTGATGTGCTGGACTCTGGGGGGGGGGAGTTCACCCACAGCCTTACTGAGGACGACGCCCCCCCCTTTCTAAGACATTTTATGAGAGGAAGCAAGGCAAACCCGTTTTA…
Q9P0K7	9.15149	0.947791	3.88714e-06	sp|Q9P0K7|RAI14_HUMAN`Q9P0K7`Q:1-972,H:1-980`39.28%ID`E:3e-139`RecName: Full=Ankycorbin; AltName: Full=Ankyrin repeat and coiled-coil structure-containing protein; AltName: Full=Novel retinal pigment epithelial cell protein; AltName: Full=Retinoic acid-induced protein 14;`Eukaryota; Metazoa; Chordata; Craniata; Vertebrata; Euteleostomi; Mammalia; Eutheria; Euarchontoglires; Primates; Haplorrhini;…	GO:0005938^cellular_component^cell cortex`GO:0005856^cellular_component^cytoskeleton`GO:0005739^cellular_component^mitochondrion	MKSLKAKFRKTDTNEWNKNDERLLAAVEHGEVEKVASLLAKKGSNAVKLDNEGKSALHVAAAGGHTDCLAAILAHGADLSVSDASGFTALHLAAKNNHVECCKKLVQNKCAVEATDGSGRTALHYAAANGNIQIVQLLCELRSPINLKDADGLTPLLSAAKHCHSEICCTLLDFGADINAPDNTGRTALMVAAESNAVSVVEVLVQREADLSAVDLEGHDVLHYVKLSANAEARAALTAALNRHHVLSEKSQKQPVQTEDGTKTVCPNINSPKTPQHDQVAKLSDEKNTTPKKRKAPPPPISPLQSFETSPSPPPSTSKSETSKRFSYKEDEIIAKREEVKKPLKESIMLLQTIKDLKQTVETLAAADLETEAEQTDTAGLVSALQAGINVVSSVDQQL…	AGAAATTCACAACACATGTGCAGACAGAGTATGAAATTTTAATAAAGTGGGTGAAAATGCCATTTTTTTCTTGAATCCTCCCACTTCAACGCAGTTTCTAAAGAAACAACGAAACAAAAAGGCTGTTTCTCAGTTTTCCCTTTCCTGGTATAAAACATTTTTAGTAAAGGCGAGTAGATATTTATGACACTCGACTGCAACCGTAACAGTAAAAGACATGCAAAGTTCTCATCAGGGTCGAGCATATTTGATCTAGGCGTTCAAATAACCCTGAGTGACTCGCTCGAGACACGGCTTCATGTAATCCGACTCCCCTTAAAGCGGCGCGTTAGCATTGTATGCACGCTGAGCGGAAAGGAGATCTGAGCACATTGCTAAGGCAAAGGAGTGTGGAGTTAC…
Q70CQ2	9.14307	0.862157	4.04136e-08	sp|Q70CQ2|UBP34_HUMAN`Q70CQ2`Q:11-2824,H:761-3541`85.1%ID`E:0`RecName: Full=Ubiquitin carboxyl-terminal hydrolase 34; EC=3.4.19.12; AltName: Full=Deubiquitinating enzyme 34; AltName: Full=Ubiquitin thioesterase 34; AltName: Full=Ubiquitin-specific-processing protease 34;`Eukaryota; Metazoa; Chordata; Craniata; Vertebrata; Euteleostomi; Mammalia; Eutheria; Euarchontoglires; Primates; Haplorrhini; …	GO:0004197^molecular_function^cysteine-type endopeptidase activity`GO:0004221^molecular_function^ubiquitin thiolesterase activity`GO:0004843^molecular_function^ubiquitin-specific protease activity`GO:0090263^biological_process^positive regulation of canonical Wnt receptor signaling pathway`GO:0071108^biological_process^protein K48-linked deubiquitination`GO:0006511^biological_process^ubiquitin-de…	HHHHHHHHHHEGPMVEDMLSADDVSCSSSQVSAKSEKNMADFDGEESGCEEELVQINSHAELSSHLQQHLPNLASIYHEHLVQGPAVHKHQYSSHAITDINLDNVCKKGNTLLWDLVQDEDAIHLSEGLINEAEKLLCSLVCWFTDRQIRMRFIEGCLDNLAHHRSVVVSLRLLPKLFGTFQQFGSSYDTHWITMWAEKELHMMKLFFDDLQHYIQEVRENLHKFSLYSHSAEVQVRLQFLTCVFSTLGSPDHFRLSLEQVDILWHCLVEDGECYDDALHWFLNQVRSKDQHAMGMETYKHLFLEKMPQLKPETISMTGLNLFQHLCNLARLATSTLDNTSSCELCGMDQLWGIALRAQSADISRAAIQYINSYYINAGKTGLEKEQEFIRKCMESLLI…	GACCCTTCATATTAAAACTGCTTTTATTAGTCATTTCTGTTAAAATAAAGTCAAAAGAATCGTCAGAACACAGCAGAAGCAGCCAAAAATAAACATCATGGAATGTAGTTCATTAAAGAAAATAAAAGCTCCAGCTGGTCCAACATGAGGGGCTTTATTTTAACCACAGTCGAATAAAGCACCGCTTTTATAGAATTTTAGATTTATATATATTTATATAAAGATATTTATATATATATTCTAAAGTTTTTCATATACACCTTCAGGCAATGACTAGAGATGATTCTTTACAGAATCAAGTTCTTTGTGGTTCTCTTAATTTACAGGTAAACTTGGTTTCTGGATAATTAAACCACAGAAAAACTCAAGGCAACTTTCTTTTGCCTCGTTCTTAAAGTA…
Q5R611	9.12352	0.842839	0.000194513	sp|Q5R611|HRSL3_PONAB`Q5R611`Q:9-169,H:7-162`52.8%ID`E:2e-42`RecName: Full=HRAS-like suppressor 3; Short=HRSL3; EC=3.1.1.32; EC=3.1.1.4; AltName: Full=Group XVI phospholipase A1/A2; AltName: Full=H-rev 107 protein homolog;`Eukaryota; Metazoa; Chordata; Craniata; Vertebrata; Euteleostomi; Mammalia; Eutheria; Euarchontoglires; Primates; Haplorrhini; Catarrhini; Hominidae; Pongo.	GO:0016021^cellular_component^integral to membrane`GO:0048471^cellular_component^perinuclear region of cytoplasm`GO:0052740^molecular_function^1-acyl-2-lysophosphatidylserine acylhydrolase activity`GO:0008970^molecular_function^phosphatidylcholine 1-acylhydrolase activity`GO:0052739^molecular_function^phosphatidylserine 1-acylhydrolase activity`GO:0004623^molecular_function^phospholipase A2 activ…	MAPTLYDVKPEPGDLIEIYRGSYQHWAVYVGDGFVVHMAPPFEGPDAGSSSMMSVLTEKAMVKREELWDVVGTHKWKINNSLDEEYKPRPPRDIVAEACALVGQELPYCIFRGNCEHFVNELRYGKAESRQVRKAGEAVMVAGVAAAVGLGFVALAGALFGAFNKKDKNNQ*	CGTAAACAGAGGCAGTGTGAGGGGCGGGTTGACCTCTATCTCTCTCTCAGTGCGGACTGTTGTTGTTGCCATCAGCTGATCGCTGAGCTTTGCTGTTCACGTCACCCGAGAGTGCCGCTACGCCTGATCCTTTGGACCAAGGAGAGGTTTTCTGGGCGGTGATTTTCGGGGGAAACCAGTCCAAACATCAATGTGCTATGGCTCCAACACTGTACGATGTGAAACCTGAGCCAGGCGACTTGATCGAGATCTATCGTGGCTCTTATCAACATTGGGCAGTGTATGTTGGCGATGGCTTCGTTGTTCACATGGCGCCACCCTTTGAAGGTCCGGATGCTGGTTCCAGCAGCATGATGTCGGTCCTAACGGAGAAGGCCATGGTGAAGAGAGAGGAGCTCT…
Q9Y2D2	9.10782	0.894079	1.81753e-10	sp|Q9Y2D2|S35A3_HUMAN`Q9Y2D2`Q:9-328,H:3-319`71.88%ID`E:3e-131`RecName: Full=UDP-N-acetylglucosamine transporter; AltName: Full=Golgi UDP-GlcNAc transporter; AltName: Full=Solute carrier family 35 member A3;`Eukaryota; Metazoa; Chordata; Craniata; Vertebrata; Euteleostomi; Mammalia; Eutheria; Euarchontoglires; Primates; Haplorrhini; Catarrhini; Hominidae; Homo.	GO:0000139^cellular_component^Golgi membrane`GO:0016021^cellular_component^integral to membrane`GO:0005351^molecular_function^sugar:hydrogen symporter activity`GO:0005462^molecular_function^UDP-N-acetylglucosamine transmembrane transporter activity`GO:0006047^biological_process^UDP-N-acetylglucosamine metabolic process	MLAAPVSPAHLKYVSLGVLVLQTTSLVLTMRYSRTLKEDGPRYLASSAVVSAEVLKMFACTVLVLVESNYSLQEMQQLLKEQIVKKPVETMKLAVPAGIYTLQNNLLYVALSNLDAATYQVTYQLKILTTALFSVSMLGKRLSLFQWLSLLLLMAGVTLVQWPTDSEGHTEEQKVLTASSQFVGVMAVLMACISSGFAGVYFEKILKETKQSVWVRNIQLGLFSFVFGFVGMLVYDRDSLRQAGMFQGYNSVTCAVVVLQAVGGLVVAVVIKYADNILKGFATSLSIIASTLISYFLLEDFHPTGVFFLGALLVIAATFLYGYERKPASIGAIKA*	TGCATGAAAGACACTTTTATTCACTCATTTATTAAAGAGCTTTATTTAGCATATAAATACCATGAAAATAGTCTTTGGAGACACTGATCAAAGAGCAGCAAGGTCCCAGCATCCCTTTCAGGGCGTTTTGATCTCATATTTCAATTAAAAAACAAAAAGATTGTGCATCAAAGTAAACTCCTCCTCCTTGCAGCAGTCCTGCTCCCCATTCCACCACTAGATGGAAGCTGCGCTCTCCTTTCTGACATTGTCAGCATGACCTACACCCCCCTCTTCCTATAGCTTCATTCCCAGTTTCCATTTAATTCAACGCGAGTACCTGATAAACCAGTTTAATGTGGAGCTCCTGCTGTTTCTCCATGTGTCCGTTTTCCTGCAGAGACGTGAACACAGAGCACA…
Q49GP3	9.09803	1.57726	5.7794e-10	sp|Q49GP3|PI4KB_DANRE`Q49GP3`Q:9-798,H:56-835`80.43%ID`E:0`RecName: Full=Phosphatidylinositol 4-kinase beta; Short=PI4K-beta; Short=PI4Kbeta; Short=PtdIns 4-kinase beta; EC=2.7.1.67;`Eukaryota; Metazoa; Chordata; Craniata; Vertebrata; Euteleostomi; Actinopterygii; Neopterygii; Teleostei; Ostariophysi; Cypriniformes; Cyprinidae; Danio.	GO:0005741^cellular_component^mitochondrial outer membrane`GO:0030867^cellular_component^rough endoplasmic reticulum membrane`GO:0004430^molecular_function^1-phosphatidylinositol 4-kinase activity`GO:0005524^molecular_function^ATP binding`GO:0006661^biological_process^phosphatidylinositol biosynthetic process`GO:0048015^biological_process^phosphatidylinositol-mediated signaling	SSGEPRGPSPQLDVISEDAMEMDLGVQQVIDPEVALKACQEVLLKVKLLDNRPAQDDRALPTEAPERCSPQWLMNPDTSSIKEEDEDEEEGHRHAPPQDRLSLPASSSSSKQSWLLRLFESKLFDVSMAISYLYKSKEPGVQAYIGNRLFSFPDGEVDFYLPQLLNMYVHMDTEVGDSIRPYLIHRCRGSITFSLLSAWLLGAYSSDMHISTQRHSRGTKLRKLILSDELKPAAPRVRREALTLTPFCPAPAGALPGEHGLSPSKRTHQRSKSDATVSISLSSNLKRTASNPKVESSPDEPVRLAPQREFIKSLIGIGKRLATLPTKEQKTQRLISELSLLNHKLPARVWLPTAAFDHHVVRVPHTQAVVLNSKDKAPYLIYVEVLECENFETSSVPAR…	GTTTCTGTTGGGTTTTATTGAAGTGATTTTTCCTTCACAGTTTGTCAGATTTATTCTGAGGAAACAGAAAAGTTCTGGAGGCGCCGCTGCTTCCGGTCCCACAGGAGATCCTCGGGCCTCATCGGGCCTCATCATCACTTACACCAGCTTCACACAGAGCAGCAGCGCCTCCTGCTGGCAGGATTCATCAGTGCGGCTGTCCGCGGCTCCACAGGCGAGGTGCAGGAGACGCTGGCGTTTCCTCGTCTGCCGGAGAGCCGGATGTGCAAAAGTCTCCGCCTCCAGAGACGAAGAAGAAAAGAGCGGCGCCGCTCCACACCTGAGCCCGAGGAGGAACACCCGGATCCCCCTCAGGGTTCGAGTCCCAGTCCTTCCCGCCGCTGCACGTCTTTGGCTCAG…
Q9Y4E6	9.08814	1.63471	4.09567e-11	sp|Q9Y4E6|WDR7_HUMAN`Q9Y4E6`Q:1-1490,H:1-1490`75.83%ID`E:0`RecName: Full=WD repeat-containing protein 7; AltName: Full=Rabconnectin-3 beta; AltName: Full=TGF-beta resistance-associated protein TRAG;`Eukaryota; Metazoa; Chordata; Craniata; Vertebrata; Euteleostomi; Mammalia; Eutheria; Euarchontoglires; Primates; Haplorrhini; Catarrhini; Hominidae; Homo.	.	MSGNNLVLPIVLWSRTAPTHCISSLLVMDDFSTIITGCHDGQICLWDMTPELQICPRAMLFGHTASITCLSKASASSDKQYIVSASESGEMCLWDVNDGRCIEFTKLACAHTGIQFYQFTIGTEKEGRLLCNGHYPEILVVDATSLEVLYSLVSKICPDWISSMSIIRSHRTQEDTVVAVSVTGILKVWIITAEVSKMQDLDPVFEEESKPIYCQGCQSISFCSFTQSSLLVVCSKYWRVFDAGDYSLLCSVASESDQSWTGGEFVAADKVIIWTEDGCSYIYKLPASCLSASEHFRSDIGKTKEGSIPPLIYKIAERADKQTEEEGGEEEVAVEVICLPASGYDLELYTPEQLYQHRPLEAPLLICPPVTRFFFGRREPFHKLLIQGDSAGRLSLWSV…	GACACAAAACCCAGGAATGCTTTTATTGGACAACAGCAATACATTTAACAACACATGTACGTGATGCACAGCAGGATGAAGGGAAGCTCATATTCATGCAGGACATCAGTCACTTTAAACACGTCACTTCCTGTTAACAATCAGAACTGAATGAGCAGAAATAGGAGAGCGATGGGAGCACGTCAGGAAGGAGAAAACAAAAGAGCTTCTCCTGCTTCACCACAGACCCTCTTTTTCTGGCTGACTGAGCTGATCTCCTCACTTGTTACTTACTGTTCAGCTCTTCCTCCCTGCCTCCTCCACTTTTCTCACCCATCCTCCCCAGAGAGGCTGCCAAAAACATATTTTCTCAAACTGTTAAGAGTGCCGGAGGAAAGGAAAGATTAAGATCTCAGAGCT…
Q9W735	9.07876	1.1022	5.02391e-06	sp|Q9W735|PRM1A_DANRE`Q9W735`Q:36-809,H:27-826`31.84%ID`E:1e-125`RecName: Full=Prominin-1-A; AltName: Full=Prominin-like protein 1;`Eukaryota; Metazoa; Chordata; Craniata; Vertebrata; Euteleostomi; Actinopterygii; Neopterygii; Teleostei; Ostariophysi; Cypriniformes; Cyprinidae; Danio.	GO:0016324^cellular_component^apical plasma membrane`GO:0016021^cellular_component^integral to membrane	MESCWRRAGAFRSVMGLLVVELLLVFQLVHSQPTCPAGPAQENLTQPQYETATEKDPSVGFMAPFAQSFLKTVQPNPFPKDLIQQFLQGNGISDQEVIKKILVYEVGFLVCIAIGILYIVLMPIIGFILACCRCCGNCGGKMYQKQTSSIHCIRRTLYVFAWATTLIILAGNICMFKSNAALKVSVEQSPVELNRAIGNIHKLLTSVPQQMDSVVHESYKTIQEVTKNLDDIGTQLGSEIQQRFRGTLDSTLNSVKRLGQECSDIGDQLNQLNSSLTQVKSTMDRLQANITKVKNQINQTLSNPSCTNCSAAASEVKKLKWDSSVTIPNLNELFSAVDEAKNNLQNKTKEAEAYFDRIPDEVTNDTQDFVKKGKALLQNVKEQISQIPNFESELRQISV…	GTGTATAGTATAATACAACTGTTTTTTGTTTTAGATAGTACTTGATTATCATAAGAAATTGGAGGCGGAAGACCTAATTTTCCTATATTTCAACATGCTGTCTTTTAAGATGCATCAAGACACAACTTGCACTGTGATTTAATCACCCTGGGAGCCTGTATCGTCCTGTTGAATACTTCTCACCTGTTCTAACCTGCTATTATGGAGAGCTGCTGGAGACGTGCTGGAGCATTCAGGAGTGTAATGGGACTGCTGGTGGTGGAGCTCCTCCTCGTCTTCCAGTTAGTGCATTCTCAGCCCACTTGTCCTGCAGGCCCGGCCCAAGAGAACCTCACCCAGCCTCAGTATGAAACCGCAACCGAAAAGGACCCCAGTGTGGGCTTTATGGCCCCTTTTGCC…
Q9H6R3	9.05259	0.776025	4.39159e-06	sp|Q9H6R3|ACSS3_HUMAN`Q9H6R3`Q:1-574,H:112-685`71.6%ID`E:0`RecName: Full=Acyl-CoA synthetase short-chain family member 3, mitochondrial; EC=6.2.1.1; AltName: Full=Acyl-CoA synthetase short-chain family member 3; Flags: Precursor;`Eukaryota; Metazoa; Chordata; Craniata; Vertebrata; Euteleostomi; Mammalia; Eutheria; Euarchontoglires; Primates; Haplorrhini; Catarrhini; Hominidae; Homo.	GO:0005739^cellular_component^mitochondrion`GO:0003987^molecular_function^acetate-CoA ligase activity`GO:0005524^molecular_function^ATP binding	MCYNAVDRHVESGRGEQPAIIHDSPVTGTKKIITFRELQAEVSKLAGVLVRNGVRQGDLVVIYMPMVPEAMITMLACARIGAPHSLIFGGFASKELSVRIDHAKPKLMVTASFGIEPGRRVEYTPLVKKALEMSSHKPSKVLIYNRPNMEKVFLSPELSLDWDEEMASARPHDCVSLPSNHPLYVLYTSGTTGTPKGLVRDTAGYAVMLKWTMSNIYGLKPGDTWWAASDLGWVVGHSYICYAPLLHGNSTILYEGKPVGTPDPGAFFRVLSEHGASSMFTAPTAIRAIRQQDPHAAYGKKYALDRLQSLFLAGERCDVETLEWAKKSFGVPVLDHWWQTETGSAITSSFMGLGSSLTPPAGQAGKPVPGYNVTVIDDQMEEVKPRTLGNIVVRLPLPP…	AAGACGGATTTGAAAGCAGGGTTGGTGTTCAAACAGGGCGAGGTGCTGGAGGTTCTGCTGGTGCTGTCAGACCAATGTGGGGCAGTGCACGGACGTCCGTAACCTAATGTGGGTCCATCTGTGCCTCCAGACAAACAGCTGTTTCTGGCTGCTTTCCATCAACTTTAGGACAGAAGGAGGAGGAGCTTCCTGAAGAAGGCGAGATGCAGCACAAAGTTACAGGTTTGTGGGAGGAAAGCTGAACATGTGCTACAATGCTGTGGATCGGCATGTAGAAAGCGGCCGTGGAGAACAGCCCGCCATCATCCACGACAGCCCGGTGACTGGAACTAAAAAGATCATCACTTTTAGGGAACTCCAAGCCGAGGTCTCCAAGCTAGCTGGAGTCCTCGTCAGGAA…
Q2EMV9	8.9756	0.7044	0.00021283	sp|Q2EMV9|PAR14_MOUSE`Q2EMV9`Q:6-1852,H:8-1815`33.96%ID`E:0`RecName: Full=Poly [ADP-ribose] polymerase 14; Short=PARP-14; EC=2.4.2.30; AltName: Full=ADP-ribosyltransferase diphtheria toxin-like 8; Short=ARTD8; AltName: Full=Collaborator of STAT6; Short=CoaSt6;`Eukaryota; Metazoa; Chordata; Craniata; Vertebrata; Euteleostomi; Mammalia; Eutheria; Euarchontoglires; Glires; Rodentia; Sciurognathi; Mu…	GO:0005737^cellular_component^cytoplasm`GO:0005634^cellular_component^nucleus`GO:0005886^cellular_component^plasma membrane`GO:0003950^molecular_function^NAD+ ADP-ribosyltransferase activity`GO:0003676^molecular_function^nucleic acid binding`GO:0000166^molecular_function^nucleotide binding`GO:0006355^biological_process^regulation of transcription, DNA-dependent`GO:0006351^biological_process^trans…	MADGPPLIVEGDWDPSQSKNVKLKLQLYFQSKKKSGGGDCRVELEDNAARVYFNSGEVRQQVLQRDNHQILLGEKTIKLKLTSEPSHLEKNSTSNQTDSGASSDLKSSESESEPEAGSAADQDVKGLPPAVVLENISDNLSRDLLLLMVEAVSGVNENNFGLEIIRESHAAVVTFSSPAVAEKFMTVCEKHPKLQKHGLTARPLEKAKSVRVESLPSTASQDMLELWLEKIWVLPNNIVMIPEEQAAIVSFSDPKVVESICSTVDHMMRSTPLKLYSYYESLGSALYGKDRPTWEMPKPFTERVHPVIWKFLHMKSLWKSISDQMNPHFCSVKIDDPEAKLSPLQSFLWQKGLTAKDVDNWKQNAQQAFQRLMSEYLAFECVMSTKAWRVAEMDIRSVT…	TCTGGTCCAATCAGAGTCTTTATTAACCTGGACAGATTCATAGAACAGTAGGAAACAGGATACAGATCAGCTCAAAAACACTCATTAATGTTGAACAGAAAACTGATAGTCAGACATCTGCTCTTTCTTTAGTCAAACCCACGTGAAGGCTCAATGATCTGATCATAAACGGATTAAATCTCTTTTTCTCTAACATAGTAACCCTTCAAAATCCCTTTGATCCCAACACCAAACAGTAAAGATCCTTTAACCATCTGAATCCAGTCTTCTTGTACTTAAGGTGCAGCACAGATCAGCTGACTCAGGTGAAGGTGATGAGGTATTCTGGGTAAGCCTGGATGTCGTTGAAGACCACAAACATGCTCGGAGGATTTTTGTTATCCGTGACGCTGTCGTACA…
Q8NHQ8	8.95675	0.686024	0.00021435	sp|Q8NHQ8|RASF8_HUMAN`Q8NHQ8`Q:4-433,H:1-419`63.27%ID`E:4e-142`RecName: Full=Ras association domain-containing protein 8; AltName: Full=Carcinoma-associated protein HOJ-1;`Eukaryota; Metazoa; Chordata; Craniata; Vertebrata; Euteleostomi; Mammalia; Eutheria; Euarchontoglires; Primates; Haplorrhini; Catarrhini; Hominidae; Homo.	GO:0007165^biological_process^signal transduction	MKAMELKVWVDGVQRIVCGVTEFTTCQEVVIALAQAIGRTGRYTLIEKWRETERHLAPHENPVVSLNKWGQYASDVQLILQRTGPSVSERPTSDGLASVPERGLYRQSLPPLAKLRPSGTDRSLKRREPKRKSLTFTGGARGLREIFGKSKDCEAKQPQQRGVSLNLSRLGGGGPASAPGSPARELSRLVQLQRDKLQALESRLLGCEDELRDWEDAGGEAADEGNSEDELLLLEQQVRRNEAEAEEEEFWQNELQIEQESERQLRLQLAELQSRVRDCEAKLSEYLARIQSMEANVEQERLQQEAELKEEEVQVQLEKVKAELEIQSQQTARLESSCMALERSLCQSGKRLQEREQELEQLTKELRQVNLQQFIQQTGTKVTVLPAQPTGENATEVDC…	AAAAAAAAAAAAAAAAAGAAAAATGAGTGGCACCTTTAATACACTGAAAGCTAAAGTGCTGAGGCTTTGTTACACAATAAAACACAGTCATATTTGCTCATTGTACATGAGTGCAGGCTTCTTCCATAGAGCCAAGAGGAGGTAAGTGACTTTCATGAAGCTCACCTTGGAGTTTAATGTGTGTTTGTCGCCATCTAGTGGTCAAAACCCGACACTGCATTTTTTTGATTTACAGTTTAGACTTAAAGGCCGCTTGATTTACGTCATTCATTCATTCACATCACACTCTATTTGCACAGTAAATCTTCCCTAAACTCTGTTACATAATTTATTTTTATAGAACCATCAAACAGGTTATTTTCTGCTACATAAGTCAACTTTTTTTTAAAGAATATGAGT…
Q6DFC2	8.93033	0.660945	6.08335e-06	sp|Q6DFC2|CCD77_XENLA`Q6DFC2`Q:5-491,H:14-496`61.17%ID`E:6e-156`RecName: Full=Coiled-coil domain-containing protein 77;`Eukaryota; Metazoa; Chordata; Craniata; Vertebrata; Euteleostomi; Amphibia; Batrachia; Anura; Pipoidea; Pipidae; Xenopodinae; Xenopus; Xenopus.	.	MRNSSSKVQLSLIQSSTRGSGQEEESPLPPVHERLAYLRPSRELLEFYRQKIAQYDGENEDLLRMLEKQRSIIDDQHKLQWELRQREGEIAELQNALSDMQVYLFQEREQSLRLYAENDRLKIRELEDRKKIQHLLGLVGPDAGEVTYFHREPPHKVTITQKRSDSAAEDELNLRPTKIRPAASRKESNKRSKAADGDSVDSLEKYKNDNQTLLLQVEALQAQLEEQTRLAKEQVEALLEDRKIKTEEAQAQQRRDQERIAALSDKLQRTQNLLHESTRDFLQLKFESRAHEKSWMAEKDGLLRELDSCHLRLRKAGPAGPEPGRAWQPGSSTARLRPQPQRGAEQPHREELKEELKQAQRLAEMYREQCIAMETELSQIREKGDVGREIFQERSEKMA…	GGGGGCGGTCCGACTGGATTTAAACAGCAACGCCGCCGCCTAACGATTACCGGACAAGAACAGGCACTTTGATCGTTTTTTCCAGGATGGGATCTCCAGCGAAACGAGCAACACCGCGCAGGCATGAGAAACAGTTCATCTAAAGTGCAACTCTCATTAATACAATCCAGCACTCGCGGCTCCGGTCAGGAGGAAGAATCTCCTCTGCCGCCGGTCCACGAGCGGCTGGCGTACCTCCGTCCTTCCAGAGAACTCCTGGAGTTCTACCGGCAGAAGATCGCTCAGTACGACGGTGAAAACGAGGACCTGCTGCGGATGCTGGAGAAGCAGAGGAGCATCATCGACGACCAGCATAAACTCCAGTGGGAGTTACGTCAGCGTGAAGGAGAGATCGCGGAG…
Q8BJM3	8.92389	0.654827	5.16379e-06	sp|Q8BJM3|R3HCL_MOUSE`Q8BJM3`Q:113-314,H:572-770`59.41%ID`E:2e-63`RecName: Full=R3H and coiled-coil domain-containing protein 1-like; AltName: Full=Growth inhibition and differentiation-related protein 88 homolog;`Eukaryota; Metazoa; Chordata; Craniata; Vertebrata; Euteleostomi; Mammalia; Eutheria; Euarchontoglires; Glires; Rodentia; Sciurognathi; Muroidea; Muridae; Murinae; Mus; Mus.	GO:0000166^molecular_function^nucleotide binding	MDEPAPPPGSQRAGQAPRVPKHRVPDPKDGAPEERRPKARPRYTDKARKNAKNRKDKAAGAEQPAPPAGEGHQVDPHQDAQHAAAEERVPDPEEEQQRGDSQAEETLPQEETESWDTLFNDDGDCLDPYLLEELTVNDGRKESTQDPQFGYNRMDREYEEDIDLREDELSHIVEIYDFPTDFKTEDLLKLFQCSQRGGFDIKWIDDTHALGLFSSPVAAREALRSKHPLMKIRPLHKSSPTTKAKAREVSDFLLPPKERPQTSAALARQLVIGALGVKSNLTKEQREAERRKLQEAKELKRLAARQREDAWEGK*	TCGGGCCTGTATTTCAGTGGGCGTGTCCTTTAGACCTCCAGTTTCTTCTTCTGCGGTGTTTACCTTTCAAATTGGCCGGCAAACAACCGCTATCTTCCTGCATTTGCTCTCGTTAACGCTTTGAATTTTCGCGTTGATAAAGTAAAGAAAGATAAACCGGATAATAGTATCTTTGACTTCATTAACTCAATTTACTTAATATCAAAACAAAACATTTCCCATAGTTCCTTGCGGTAAGCCGGGGGTTCATAGCGAAGAGAATCTGTCGACAGAGCTCAGAAAATGAAACTTTAGCTTAGATGCTTCGCTAGCATTCATCCATGGACGAGCCTGCGCCCCCACCCGGCTCCCAAAGAGCCGGCCAGGCTCCGCGCGTCCCCAAACACCGGGTCCCCGACC…
Q4R7W3	8.90943	0.642262	0.000219385	sp|Q4R7W3|RGPS2_MACFA`Q4R7W3`Q:4-560,H:1-557`83.33%ID`E:0`RecName: Full=Ras-specific guanine nucleotide-releasing factor RalGPS2; AltName: Full=Ral GEF with PH domain and SH3-binding motif 2; AltName: Full=RalA exchange factor RalGPS2;`Eukaryota; Metazoa; Chordata; Craniata; Vertebrata; Euteleostomi; Mammalia; Eutheria; Euarchontoglires; Primates; Haplorrhini; Catarrhini; Cercopithecidae; Cercopi…	GO:0005737^cellular_component^cytoplasm`GO:0005886^cellular_component^plasma membrane`GO:0005085^molecular_function^guanyl-nucleotide exchange factor activity`GO:0005543^molecular_function^phospholipid binding`GO:0007264^biological_process^small GTPase mediated signal transduction	MGMMDLPNGQPSVTTTALTVSEKSSSSESLSEKASSELKKSFDAVVFDVLKVTPEEYAGQITLMDAPVFKAIQPEELASCGWNKKEKHRSAPTVVAFTRRFNQTSFWVVREILHAQTLKIRAEVLSLYIRTAKKLCDMNNLHAVMAVVSGLQSAPIFRLTKTWALLSRKDKMTFDRLDFLMSKEDNYKRLRDFISNQSMVSCIPYLGMYLSDLTYIDSAYPSTGSILENEQRSNLMNNILRIISDLQRSCNYDVPVLPHIQKYLNSVTYIEELQKFVEDDNYKLSQRIEPGTSTPRANASKEDLVGQEASASPLCSRKSSADATKVPATPPSPRNLLPYGHRKCHSLGYNFIHKMNTVEFKSATFPNAGSRHLLDDSVLESHSPTRGQAESSTLSSGIS…	TGTGGAGTAAAAAAAAGAAGGGCAGAGTGTTTATTGGTTCAGACTTCACACTTGGCAGCACATCACTCACAAGTGAGGTCATCGCGCCAGCCGCAGTCATGACACAGAGAAGCAGACGCACACAAAGCCAGGTGAAGGTCATTTATACCCCTCAACGTCTCTGACTCAAAGACTGTTGTTGCTCTCCCGGGTAAACTGTGAAGGAACACCCAACTGGTGCACACATCGGCTCAGACAGTAAGCCCTCCTCTGGTCGAACCCTCAAGTTAGCAGAGAAAAGGTTTTGGTGTGACCATCAAGAACACGGAAAAAGGGATTTCCTCCAAACAGCAAACACTACATTTGGAGAGCATCGTCATTTAAAGGAGAAATGTAGTAAAGCTGAGAAATGTAAAGCAT…
Q6DGR4	8.89326	0.626099	2.59848e-08	sp|Q6DGR4|F203A_DANRE`Q6DGR4`Q:1-361,H:1-362`73.76%ID`E:2e-148`RecName: Full=Protein FAM203A; AltName: Full=Brain protein 16;`Eukaryota; Metazoa; Chordata; Craniata; Vertebrata; Euteleostomi; Actinopterygii; Neopterygii; Teleostei; Ostariophysi; Cypriniformes; Cyprinidae; Danio.	.	MLSDGEAAELLSFLTPSTRPDVKAKATEYILGLSASREGCCFLRSKPDMVGALFALTSDPSVAIAKDCYHILINLSADETLHQVLVSAVEVLPVLLKKLLDPDYLFSDQISTILSNLTRHEKTCRTVFKTLQEDVGLDKLVEIFCTEGFNAKAKLHYLGPLLSNLTQLPEARNTLMDKDRCVFQRLLPFTQYQASVVRRGGVVGTLRNCCFDHTHHLWLLSDAVDILPFLLLPLAGPEELTEEENDGLPVDLQYLPEDKKREEDPDIRKMLLEALLLLTATKAGRKALKDKKVYPIMREFHRWETDVHVAAACEKLIQVLIGEEPEPGMENLMEVQIPEDVEKKLKEMDAREQEELENEERRRCEEES*	ACTAGATATCCATCACATGACTTAAAGCTCCTCCCCCTGGAAGAATAACCCTCCAGAACCAAACACCATCAGAATCAGGCGGGCGGTGGTGGTGTCTCCACAGGACGATGGTTCTGGACGTCTTGCTCTGCTCTCATCAGCATCTCTGTGGTTGCAGAAGATGCTGAGCGATGGAGAAGCTGCAGAGCTGCTGTCCTTCCTGACCCCCAGCACCCGCCCTGACGTGAAGGCCAAGGCCACCGAGTACATCCTGGGACTGTCAGCCAGCAGGGAAGGATGCTGCTTCCTACGCTCCAAACCGGACATGGTCGGCGCCCTGTTTGCGCTGACCTCTGACCCGTCTGTCGCCATAGCGAAGGACTGCTACCACATCCTCATCAACCTGTCAGCGGACGAGAC…
Q9JHW4	8.88166	1.9422	7.11211e-05	sp|Q9JHW4|SELB_MOUSE`Q9JHW4`Q:10-573,H:4-582`63.79%ID`E:0`RecName: Full=Selenocysteine-specific elongation factor; AltName: Full=Elongation factor sec; AltName: Full=Eukaryotic elongation factor, selenocysteine-tRNA-specific; Short=mSelB;`Eukaryota; Metazoa; Chordata; Craniata; Vertebrata; Euteleostomi; Mammalia; Eutheria; Euarchontoglires; Glires; Rodentia; Sciurognathi; Muroidea; Muridae; Murin…	GO:0005739^cellular_component^mitochondrion`GO:0005634^cellular_component^nucleus`GO:0005525^molecular_function^GTP binding`GO:0003924^molecular_function^GTPase activity`GO:0000049^molecular_function^tRNA binding`GO:0006184^biological_process^GTP catabolic process`GO:0001514^biological_process^selenocysteine incorporation	MSESPDSRTRTLNFNVGVLGHVDSGKTSLARALSSTASTAAFDKNPQSRERGITLDLGFSSFTVDCPDHLRDGGGLKPYDSLQFTLVDCPGHASLIRTIIGGAQIIDLMILVVDVVKGMQTQTAECLLIGELTCPSMVVVLNKIDLLPPNKRQNAVEKMTKRMHKTLESTRFKECPVIAVAARPGGPDAAEPEEPHGVQELIELLKKQTYLPKRDPAGDLLMAVDHCFSIRGQGTVMTGTILQGSLAVNDTVEIPVLKVTKKIKSVQMFRKPVSGAMQGDRVGVCVTQFDPKLLERGVVCTPGSLRTLFGAVISVRKIGYFKGSLATRAKLHITVGHETVMARVSFFGLPPSDAQSAPPELRSLEAPFDFDREYVYQDEYVSAQADGAGGGPDPEQWAL…	AGGACAAATCCAAATGTTTTCACCTTTTTATTCAAAAACATGTCAACATAAACAGAACTTTCAACTGAATAGATCAAAACTACAACAGGAATATTTGAACAGCCCAAAAGCTTAAAGATTAGGAGCAAAAACTGAAGGACGCGTCTGGATGAAGATCAAAACGGCTGGAGATGAGCGTTTCATTTCATAAATTTATGATGCTGGTCTTGGAGGATTTTGGCGGAGGACTTGGCGTCGTAAAACAACTCGTTGATTTCCTCCACCTGCTCTCTCTCCACCGTTTCTTTGCCTTGAACTCGGCCCAGCAGACTGCCTGGAGTCAGCAGCTGCACGGCGTACCTGAGGGTGGTCTTGGTGCCGATTTCTGCCAGGTGTGTCAGAGCTTCTTCGCTGATGCTG…
Q15751	8.8771	0.612086	0.000226856	sp|Q15751|HERC1_HUMAN`Q15751`Q:6-2486,H:2436-4861`78.65%ID`E:0`RecName: Full=Probable E3 ubiquitin-protein ligase HERC1; EC=6.3.2.-; AltName: Full=HECT domain and RCC1-like domain-containing protein 1; AltName: Full=p532; AltName: Full=p619;`Eukaryota; Metazoa; Chordata; Craniata; Vertebrata; Euteleostomi; Mammalia; Eutheria; Euarchontoglires; Primates; Haplorrhini; Catarrhini; Hominidae; Homo.	GO:0005829^cellular_component^cytosol`GO:0005794^cellular_component^Golgi apparatus`GO:0016020^cellular_component^membrane`GO:0005086^molecular_function^ARF guanyl-nucleotide exchange factor activity`GO:0004842^molecular_function^ubiquitin-protein ligase activity`GO:0006810^biological_process^transport	ATSAASSSDLRVSHSLDEVKVHAASNSKSESEISSVAGGASESLFLSAPHNTAGEGVRKKGHEHGPRSSHDLSSITAQSEMNAVQLSYLYLGAMKTLSALLSCSKYAELLLIPKVIPETVASSHNADLNMSSSGGAASPPMWQEEVEMRAALQFLMRHMVKRAVMRSPIKRALGLADLERAQAMIYKLVVNGLLEEPSAGKAKPGVRNEPEGEGEDLDGEQMAQTPITTSPSASSTTSFMSSSLEDTTTATTPVTDTETVPASESPGVMPLSLLRQMFSSYPTTTLVPARRAQTPPVSSLPTSPSDEVGRRQSLTSPDSQPTRVQNRAGTSLSDPSSRLSTSPPPAAIAVPLLEMGFSLRQITKALEATGARGEADAQNITVLAMWMIEHPCSEDERDE…	TTTTTCTCTTTTTTTAAAGTCCTTCGTCCACTTTATTGAGTCAAATAAAAACTGGTCCACAGTGATAACGCGTGCTGCAACCGCCTCTCATGACCTGCTGCAGGTCATGAGAGGCGTTGTGCACCTCGACTGCAGTGTTTGGCTCAGAACCAGGACTGGATGTTCAGAACGACGTGCAGCTTTACCTCTGCAGCAGAACTGGGAGCTGCAGCTGTGTCAGATTTCACATTTCAAAAAGCCGTTTTCTCTCAAACAAACGCACTTCACTGACACAGCATTTAATGTTGTTGCTCTGGGAAACTCGCCAACCGCAAAGAAAAGAAATAAATATCGACAAAACGCATTATATTTTCCGAACAAAGCATTACACAATGTACAACATTCTGTTATGCTGCTATA…
Q5RDU7	8.85346	0.588402	7.83914e-06	sp|Q5RDU7|YPEL5_PONAB`Q5RDU7`Q:1-121,H:1-121`100%ID`E:4e-67`RecName: Full=Protein yippee-like 5;`Eukaryota; Metazoa; Chordata; Craniata; Vertebrata; Euteleostomi; Mammalia; Eutheria; Euarchontoglires; Primates; Haplorrhini; Catarrhini; Hominidae; Pongo.	GO:0033743^molecular_function^peptide-methionine (R)-S-oxide reductase activity	MGRIFLDHIGGTRLFSCANCDTILTNRSELISTRFTGATGRAFLFNKVVNLQYSEVQDRVMLTGRHMVRDVSCKNCNSKLGWIYEFATEDSQRYKEGRVILERALVRESEGFEEHVPSDNS*	CGCAGTAACAGCTGAAAAAGAAAAACAAAGCAACGACGACGACGACGAAAGAAACAACAGCTTTGTGCCTCGAATATTCTTCTGTTATCGGTGACATTATTTCTGAGCGAAACAGTCGGATCCCCACAAAGTTATTCGAAGAGTGGTGATAATTCCCAGAGATTCAACGATGGGACGCATCTTTCTGGACCACATTGGTGGAACGCGTCTCTTTTCTTGTGCCAACTGTGACACCATCCTGACCAACAGATCTGAACTGATCTCCACGCGATTCACTGGAGCCACAGGCAGAGCTTTTCTCTTTAATAAGGTGGTGAACCTCCAGTATAGCGAGGTCCAGGACAGAGTGATGCTCACCGGCAGGCACATGGTGAGGGACGTCAGCTGCAAGAACTGCAA…
Q14244	8.83405	0.633326	8.06741e-10	sp|Q14244|MAP7_HUMAN`Q14244`Q:56-370,H:61-370`37.76%ID`E:5e-33`RecName: Full=Ensconsin; AltName: Full=Epithelial microtubule-associated protein of 115 kDa; Short=E-MAP-115; AltName: Full=Microtubule-associated protein 7; Short=MAP-7;`Eukaryota; Metazoa; Chordata; Craniata; Vertebrata; Euteleostomi; Mammalia; Eutheria; Euarchontoglires; Primates; Haplorrhini; Catarrhini; Hominidae; Homo.	GO:0016323^cellular_component^basolateral plasma membrane`GO:0005737^cellular_component^cytoplasm`GO:0005874^cellular_component^microtubule`GO:0005875^cellular_component^microtubule associated complex`GO:0048471^cellular_component^perinuclear region of cytoplasm`GO:0005102^molecular_function^receptor binding`GO:0005198^molecular_function^structural molecule activity`GO:0007163^biological_process^…	MAEGATTLKGLRAQIAAAAQAQAEERRSLAGNSPGPTGDTLAKPQGCKPVIDGSSLRVDDRLRVAKERREEAERQQALRESQIMERERKAKLQVERQLEERQKKLEEQRRKEEQKRLAVEEKRKQKQEEEKEHYEAVMRRTLERSQRLEQRQKRWSWGGQSPDQDSRAADKRFPSATNLKQPAATISKRLSSSATLIKSPDKSAKPRSSSCNRLPSNGNDAQAANEDGKKLQSQQTCGTGRSVKKRSSSLSRVSGGRAQTPAKSDKGTTDDQASASPLPPPRGPVRSRSIDRQKKSGMTTSVSADGALDPSLKDKSSVSPGGKQPSCPSSTLGRNRSPSPAPNPAPKRTPSPSAAKQSPRMRPPSPGAMKQRPPSPQPTSAKPPPIQKPALTPTGPPTL…	TTTTCATTTTCAACATTTTATTGTTTAACAGTCTGGATCATCTCTTCAGATACATTTATTGTACAAATGTCATTGTGATATGGGGTTATTACCAAATCTTTCAAAGAAATATTTATATTCACAGAGCAGCCCTACTGAAGCAGAGTGATTGTCAAGGCCGAGGTAAGGACATGTTTTACGGACGACACACTACTCAACCTCAATCTAAGGCACTGTTCTATCCTGTTGTGAGTACAAAGAGCCGTCAGCTCAGTTTAGTCCCCAAAAGACGCAGCAGGACCTGAAGTGTGTTTAAGCAGCAGGTACAGAATCCTTCTTACAGGAAGAACTTATGAGCAGAAACGAAAATGAGAAGAAACATGAGAGCATGGGGTTACGACAGAGAACATGAAGTTTCAG…
P57113	8.77521	0.52258	0.000249146	sp|P57113|MAAI_RAT`P57113`Q:17-226,H:5-215`71.56%ID`E:7e-89`RecName: Full=Maleylacetoacetate isomerase; Short=MAAI; EC=5.2.1.2; AltName: Full=GSTZ1-1; AltName: Full=Glutathione S-transferase zeta 1; EC=2.5.1.18;`Eukaryota; Metazoa; Chordata; Craniata; Vertebrata; Euteleostomi; Mammalia; Eutheria; Euarchontoglires; Glires; Rodentia; Sciurognathi; Muroidea; Muridae; Murinae; Rattus.	GO:0005737^cellular_component^cytoplasm`GO:0004364^molecular_function^glutathione transferase activity`GO:0016034^molecular_function^maleylacetoacetate isomerase activity`GO:0006559^biological_process^L-phenylalanine catabolic process`GO:0006572^biological_process^tyrosine catabolic process	FQLRKSSAYKVMESTTKPVLYSYFRSSCSWRVRIAFALKGIEFKLVPVNLIKDGGQQLSEQYRKLNPMQQVPAVEIDGITLCQSLAVIQYIDETRPGPRLLPADPKTRAKVRMISDLIASGIQPIQNLSVLQKVGEEKVPWAQHFINRGFQALEPILKETSGKYCVGDEISMADICLVPQVYNAERFKVDMGQYPTIRRLNETLLELEAFKVSHPSQQPDTPANLQA*	GTTTCAGCTTAGAAAATCTTCAGCATACAAAGTTATGGAATCCACAACCAAGCCCGTGCTTTACAGCTACTTCAGAAGTTCATGCTCTTGGAGGGTTCGCATTGCATTTGCTCTCAAAGGCATTGAATTTAAGCTGGTTCCAGTCAATTTGATCAAAGATGGAGGTCAGCAGCTCTCAGAGCAATACAGAAAATTAAACCCCATGCAGCAAGTTCCTGCAGTGGAAATTGATGGCATCACCCTCTGTCAGTCACTTGCAGTGATTCAGTACATTGATGAGACTAGACCGGGACCCCGTCTTCTTCCTGCGGATCCAAAAACACGTGCCAAAGTTCGGATGATAAGTGACCTTATTGCTTCAGGCATACAGCCTATACAGAATTTGTCCGTCCTCCAGAA…
Q9NTM9	8.58605	0.507122	1.33149e-05	sp|Q9NTM9|CUTC_HUMAN`Q9NTM9`Q:1-123,H:150-272`80.49%ID`E:4e-53`RecName: Full=Copper homeostasis protein cutC homolog;`Eukaryota; Metazoa; Chordata; Craniata; Vertebrata; Euteleostomi; Mammalia; Eutheria; Euarchontoglires; Primates; Haplorrhini; Catarrhini; Hominidae; Homo.	GO:0016235^cellular_component^aggresome`GO:0005737^cellular_component^cytoplasm`GO:0005730^cellular_component^nucleolus`GO:0005507^molecular_function^copper ion binding`GO:0055070^biological_process^copper ion homeostasis`GO:0006825^biological_process^copper ion transport`GO:0051262^biological_process^protein tetramerization	MVHDSAVALETLISLGFERVLTSGCDISALEGLPVIKRLIDQAKDRIIVMPGGGITERNLQRILEGSGAQEFHCSARSSRDSAMKFRNTSVTMGASFSAPEYGLKVADVSKVRSLNAIAKNTL*	GCTGAATAAACAGTGTGCTTTTGTAACTGGAGGCTTTCAAAGATGGGGAGGTTCAGATTGTCCTACCTCTTAAGTTTTAAGCTGTACAGTGTCTTTTCCTGGTATTTATTTGACTTATTCTTGTGGTTATTGATCCTTGCTCTTACTCCATTTCTCCAGCTGCTGCTCGACCTTTACCCGTCACCTTCCACCGAGCTTTTGATATGGTTCACGACTCAGCAGTGGCTCTGGAGACCCTGATATCATTAGGGTTTGAGCGCGTGTTGACAAGCGGCTGTGATATTTCTGCTTTGGAGGGACTCCCTGTGATTAAACGGCTCATTGATCAAGCAAAAGACAGAATTATTGTGATGCCAGGAGGAGGTATTACGGAAAGAAACTTGCAGAGAATACTAGAGG…
Q8BLS7	8.54296	0.299673	2.55535e-06	sp|Q8BLS7|SWAHA_MOUSE`Q8BLS7`Q:158-284,H:292-425`48.51%ID`E:3e-27`RecName: Full=Ankyrin repeat domain-containing protein SOWAHA; AltName: Full=Ankyrin repeat domain-containing protein 43; AltName: Full=Protein sosondowah homolog A; Flags: Precursor;`Eukaryota; Metazoa; Chordata; Craniata; Vertebrata; Euteleostomi; Mammalia; Eutheria; Euarchontoglires; Glires; Rodentia; Sciurognathi; Muroidea; Mur…	.	MRDVSEESLLDYFHSAAGNSGRVRNADILKTFKPFIGHSDLQLRAKYREEFKLIIDRIAVVKSENGEKYLILKKKYRHLLQERDAKRLGSDADQPRHASPTRTAATAQWETTDGLTRPTHQRDERMGTVQHPQQGGDQHNGEDELGSDSGSKSESEHDEESTGSMGSASVALDPTEKEWIYSAASARVPDLLKLLVQDPSLANKKDFTSGFTALHWAAKHGNEDMVTLVADAGADVNLKSHGGYTPLHIAALHGHQHILDLLIQSYGAKENLRDYSGHLACHYLNMKDPEGPGEDRELQFHVTQVRERNKNRKLVSLFHSKKKWGSAEELAPIEEERTAPHQLIVPALRPRKFSR*	ACTTAAAAGCAACACAAAGCGCATTTTAGTCAAGTTTCTGCTGTAAAAAGCTCATTTAAAATAATGAGCAGACTTACTAGAGCTTACTGCAAATTCAGTAATATCCTGAAAGATTTCTTGTAGTTTTATTTTAAATGATAAAGTTAGCAATTTTATAGGGGTGTAAGGATTAATCGATTAATTAATGAATCGATTTCTATTCCAGATTGATCTTGACCTTTGTCATTAAAACATTGATTAATTGTGAGATATTTTTTGGTTTTTGCTCTAACTTAGAAACCATTTCAGGTTTAGAGTTGATGCAAACTTCAAGTATTTCATGTCCAAGTTGAAAATGTGGCTTAAATTAGCATAAAGAAGGAGAAATTCAGACTTCTAGAGCTTGTAATATCTGGTAAC…
Q5F3R2	8.53881	0.296209	1.13539e-05	sp|Q5F3R2|KDM5B_CHICK`Q5F3R2`Q:5-1535,H:3-1514`55.7%ID`E:0`RecName: Full=Lysine-specific demethylase 5B; EC=1.14.11.-; AltName: Full=Histone demethylase JARID1B; AltName: Full=Jumonji/ARID domain-containing protein 1B;`Eukaryota; Metazoa; Chordata; Craniata; Vertebrata; Euteleostomi; Archosauria; Dinosauria; Saurischia; Theropoda; Coelurosauria; Aves; Neognathae; Galliformes; Phasianidae; Phasian…	GO:0005634^cellular_component^nucleus`GO:0003677^molecular_function^DNA binding`GO:0034648^molecular_function^histone demethylase activity (H3-dimethyl-K4 specific)`GO:0034647^molecular_function^histone demethylase activity (H3-trimethyl-K4 specific)`GO:0046872^molecular_function^metal ion binding`GO:0016706^molecular_function^oxidoreductase activity, acting on paired donors, with incorporation o…	MDSEEFIPPPECPVFEPSWEEFQDPLGYIAKIRPIAEKSGICKIRPPPEWQPPFSVELDSFHFTPRVQRLNELEAETRVKLNYLDRIARFWEIQGSSLKIPHIERRILDLFSLSKIVTDEGGFEMVCKERRWARIAQRLGYPPGKNIGSLLRSHYERIIYPFQMFQSGSCLLPCKPKHYDGEDVDKEYKPHSIPLRQSVQPSKISSYGRRANRCQPDPEPTEEDIEKNPELKKLQIYGAGPKMMGLGLVARDKSIRKKDELPQTLTIKDNASPPAAENPVKSEPLEPELGQNDGSAHNAQPPPPTVIVKKEEIKEEEDKKSDVKGDHMEGPCTKMTMRLRRNPNNPQCVDSYVCRMCGRGDDDDKLLLCDGCDDNYHTYCLLPPLGDPPKSNWKCPKCV…	TTCTTTTTTTTTTTTTTTTAAACCACATCTGCATCAATTCTTAAAAGTTTTGAGAAAAGATTAGTTGATTAGCTGGAAAAACCAGCCAAAAGACAAAACAGTGACGGAAGTCTTTAGTAACTTATGGAAAAAAATAGTAAGGAAGTAGCACCATGTTCACTGAGGGCAAGCCAGAAGGTAAAGGGGAGGAGCCACAAGACACACAGGAGTTCAAGTGTGCGCTCAAGTGCTGCGGCTTTCAAAAAGACTGCTCATCCTTCAATGTGACGTTTTTGGTCTTCAGTCTCCTCTTTCATAGTCAGGTTGTGTGCAGCTTATGCAAATGTAGTCCTCCTTCTCTGCCCGCTCTGCAGAGAGTCCCACACACACCTGATGGAACCACTGGTTACAGCTGCCGTC…
Q7RTP0	8.51394	0.273098	4.74583e-08	sp|Q7RTP0|NIPA1_HUMAN`Q7RTP0`Q:18-310,H:17-310`59.18%ID`E:4e-95`RecName: Full=Magnesium transporter NIPA1; AltName: Full=Non-imprinted in Prader-Willi/Angelman syndrome region protein 1; AltName: Full=Spastic paraplegia 6 protein;`Eukaryota; Metazoa; Chordata; Craniata; Vertebrata; Euteleostomi; Mammalia; Eutheria; Euarchontoglires; Primates; Haplorrhini; Catarrhini; Hominidae; Homo.	GO:0005769^cellular_component^early endosome`GO:0016021^cellular_component^integral to membrane`GO:0005886^cellular_component^plasma membrane`GO:0015095^molecular_function^magnesium ion transmembrane transporter activity`GO:0008219^biological_process^cell death	KVCVCETLDVKVQNASMADGSELPVPSSEITGIFIAVLSSFVNGCTFVLQKKGILRSRDKGVSYLTDLVWWSGTLCMIIGQIGNFLAYNVAPVVIVTPLGALGVLFGAVLASWILEEHLNILGKLGCLLCCCGSIVLIIHSPKAEATSRAEFEERLFDPVFVTYILLVAVLLIILVVWIVPAHGTSNILVYVSICSLLGNFTVPCSKGLGLVAPDAFEEGPSSNKALALLLGLLVTLAVSILTQFYFINKALECFSSNIFDAIYYVTFTSTVIFASAILFKEWTALTVADSLAMLCSLTVVCVGVVLLRISQGALISWKKEPTKEKKN*	GAGGTGAATTTCTGATGAACTCCTACTATTCTGAAGAAACTATGTTCTAGAAAATGACAGATTTTCAAATTTGGCCTAAAAATAATCATAATTAAAAGACCACTTGGAATGAGTTTATAATACTGGTAGATCAAAAGTTAATTAGAGAGAGAATTTAAATAAGATCAGTGATTAGGAATTGAAAATAGTTGAGGTAAACTAGTTAACGTGAAAGGAATGACACGTTTTTAAATTCTGTTTAGGATACAACATTTGAAACTTATGAAATCCAATCAAAAAATTAACTAGAAAACTAAACATCAAAACAATTCAACATTAAAGATCCAAATAACAGTCAGAGACAACTGGTATTTAAGCACCACAAGAACTATAGCATAAAAAGTTATTTTTCTCCTACAA…
A4IIX9	8.49352	1.50899	2.13659e-06	sp|A4IIX9|WDR37_XENTR`A4IIX9`Q:1-494,H:1-494`85.43%ID`E:0`RecName: Full=WD repeat-containing protein 37;`Eukaryota; Metazoa; Chordata; Craniata; Vertebrata; Euteleostomi; Amphibia; Batrachia; Anura; Pipoidea; Pipidae; Xenopodinae; Xenopus; Silurana.	.	MPMESGSSSAARQTKQKRKSHSLSIRRTNSTDQDRMGLQRDMLEGQDSKLPLSLRSNLLELFSQIEREFENLYLENIELRREIDTLNERLAAEGHTFDGADLAKGALKTKASHSTSQLSQKLKTTYKASTSKIVSSFKATAARAVCQLVKEYVGHRDGIWDLGITRNQPVVLGTASADHTAMLWSIETGKCLLKYMGHQGSVNSIKFHPNEQMALTASGDQTAHIWRYMVQLPTPQPVADVSTPCEDDVDFSDKDEADGEVEGPIDCPSIRVATTMLRSHQGVVIAADWLVGGKQVVTASWDRSANLYDVETSELVHSLTGHDQELTHCCTHPTQRLVVTSSRDTTFRLWDFRDPSIHSVNVFQGHTDTVTSAVFTTGDNVVSGSDDRTVKVWDLKNMR…	TTCTCATAACTTTACAACTTTATTATTAAAAAATTTCAACTTTTTCTTACACAATTTTTTTCATAATTTTACTACTTAATTTTTGTATTTTCCTCATATTTGCAGCTTCAAACTTGCTCAATTTTAATTTCCCATAATTTTAAAATTTCATTCTTGTAAAATTTTGACTTTTTTCTCATAGTTTTAGAACTTTGATAGTTTTTGACTTGTTTCTTCATAATTGTACAACTTTATAAGATTTTGACTTTTCATAATTTTACAATTTCGTTCTTGTAAAGTTTCTACTTTCTCATAAGATGTAAACTTTATTCTTTAAAATTTTGACTAATTTTCTATCTCTGTAAACGTAACGTTTTTCTCATAATTTTACGACTTTAATCTTGTACAATTTTGTCACTC…
Q7RTP0	8.43399	0.19965	2.28594e-07	sp|Q7RTP0|NIPA1_HUMAN`Q7RTP0`Q:18-310,H:17-310`59.18%ID`E:4e-95`RecName: Full=Magnesium transporter NIPA1; AltName: Full=Non-imprinted in Prader-Willi/Angelman syndrome region protein 1; AltName: Full=Spastic paraplegia 6 protein;`Eukaryota; Metazoa; Chordata; Craniata; Vertebrata; Euteleostomi; Mammalia; Eutheria; Euarchontoglires; Primates; Haplorrhini; Catarrhini; Hominidae; Homo.	GO:0005769^cellular_component^early endosome`GO:0016021^cellular_component^integral to membrane`GO:0005886^cellular_component^plasma membrane`GO:0015095^molecular_function^magnesium ion transmembrane transporter activity`GO:0008219^biological_process^cell death	KVCVCETLDVKVQNASMADGSELPVPSSEITGIFIAVLSSFVNGCTFVLQKKGILRSRDKGVSYLTDLVWWSGTLCMIIGQIGNFLAYNVAPVVIVTPLGALGVLFGAVLASWILEEHLNILGKLGCLLCCCGSIVLIIHSPKAEATSRAEFEERLFDPVFVTYILLVAVLLIILVVWIVPAHGTSNILVYVSICSLLGNFTVPCSKGLGLVAPDAFEEGPSSNKALALLLGLLVTLAVSILTQFYFINKALECFSSNIFDAIYYVTFTSTVIFASAILFKEWTALTVADSLAMLCSLTVVCVGVVLLRISQGALISWKKEPTKEKKN*	TTTTCCTTTTCACTGTCTAGTTTATTTCATTCGTTTTCCATCAAATACACTTTAAAAAACAGAATTTTAATGAAATGCAGGACGGAGCTGAAGCCCCTCCCCGTTGATGCTCCGCCTCCGTCTGCTACTGGTCTGTTCTGACATCTTTAGCATCAGTTTTGGCAGACGATCCAGATCCAGATCAGATCCTGATCTAGATCTCCACCAAAGCGGTCCTGAAGCAGGAAAGTCCGCTGAACCCGAATGAAGACTGGATTGAGTGGAGCACCACAACCAGAGAAGGTGATCCGGTCGGATCCACGAGGATCTAGAGAAGATCTTTTTACAGACTCACATCAACCTTCAGTCCAACAGAAGCTACAGGAGAACTAGAGACATATTTACACGAGAAGACTTTTA…
Q90372	8.40817	0.258266	2.42028e-09	sp|Q90372|QNR71_COTJA`Q90372`Q:1-499,H:109-555`35.13%ID`E:7e-80`RecName: Full=Protein QNR-71; Flags: Precursor;`Eukaryota; Metazoa; Chordata; Craniata; Vertebrata; Euteleostomi; Archosauria; Dinosauria; Saurischia; Theropoda; Coelurosauria; Aves; Neognathae; Galliformes; Phasianidae; Perdicinae; Coturnix.	GO:0016021^cellular_component^integral to membrane	DNGDLVWDEHCEDANGQVRSGYVYNWTSWLDDYGFGKCIDKSKCNVFPDGKPFPQSNDWRHKSYVYVWHTMGQYYETCDGSSSSVTINTTNIPLGAEVMEVLVYRQRERRKYSPLTTDNSVYYITDKIPVAVDISQKSAVNQSANVFVRGEDVVFAVHLHDPSNYLKTAVAIDYIWDFRDGNQLVTHRELTTHTYTSLGKMSVKLVVEAAFPVECPPASATSAPPHTDTPTTPPASHAVTTKTRTSTALQSTSRPSLSSSTASMTTELPTTEPLPPTESISTTMPWLRTRRLNCNQCLRYAYGTFTGNITIVEPKHPLKSWPNSRIVDVSAARVTNTEVNFMVKCLGSIPTSACTIVSDPSCTQVRNIMCDDVPPSSDCQVNLRRRFLEPGTYCVNITL…	ATGATAACGGAGACCTTGTGTGGGATGAGCACTGTGAGGATGCAAATGGACAAGTTCGCTCCGGTTACGTCTACAACTGGACGTCCTGGTTGGACGACTATGGCTTCGGAAAGTGCATTGACAAAAGTAAATGTAATGTTTTCCCCGATGGCAAACCCTTCCCTCAGAGCAACGATTGGAGGCACAAGAGCTACGTCTACGTTTGGCACACGATGGGTCAGTACTACGAAACATGTGATGGTTCCTCTTCCAGCGTGACCATCAACACCACCAACATCCCTCTGGGAGCTGAAGTCATGGAGGTTTTGGTCTACAGGCAGCGGGAGCGCAGGAAGTACAGCCCTCTCACTACCGACAACAGCGTCTATTACATAACAGATAAGATCCCAGTGGCGGTCG…
Q9QUR8	8.34805	0.121118	1.33092e-05	sp|Q9QUR8|SEM7A_MOUSE`Q9QUR8`Q:96-485,H:221-627`31.54%ID`E:5e-55`RecName: Full=Semaphorin-7A; AltName: Full=Semaphorin-K1; Short=Sema K1; AltName: Full=Semaphorin-L; Short=Sema L; AltName: CD_antigen=CD108; Flags: Precursor;`Eukaryota; Metazoa; Chordata; Craniata; Vertebrata; Euteleostomi; Mammalia; Eutheria; Euarchontoglires; Glires; Rodentia; Sciurognathi; Muroidea; Muridae; Murinae; Mus; Mus.	GO:0031225^cellular_component^anchored to membrane`GO:0009897^cellular_component^external side of plasma membrane`GO:0004872^molecular_function^receptor activity`GO:0006954^biological_process^inflammatory response`GO:0007229^biological_process^integrin-mediated signaling pathway`GO:0045773^biological_process^positive regulation of axon extension`GO:0070374^biological_process^positive regulation o…	SAFVCGSSHEETNCCEMDITANPLEARCSPSQELQHIKQSIKGFVTKEGEHSIFVKSGNNASLSLYMTSSGNGENVGIYRFGKQKLAPHSHSNEQHFVGLMLSKRENSLQDRIYAFYKQKNKDTALDSDKWIPFVSQVCTADIGGRKNLLQNKWTSMMNARLFCGDPERKQYFSELLDVNIVDADRWEETKVYALFRNEWGVSAVCMYTVADIHKVFMKSPFKEPQTKRQPDRPRECVLESSKISTAILNNIKEVSEMEEWVKPVKNHLPLLVHRHNYTGIHVDASQHSSNTVIFLSLANGGIHKVLQSEKDTFLISEYRPFHHHAHISSFFLHTPSRKLYVTSHREVVEVDVVNCERYGNSCEDCILSRDPYCSWSNNQCTEKRSFQQDMITGNQGGC…	TCCCCTAAGCTCCACCCCTCTGACTGGATTTTCAAGTGGGTGGAGTTGATCGTCTTCCTTCCGGGCAGTACTGTAATTTGACCATTAAAAGGTCTTCAATGTTGATAACACTTCAGTAAAAACATACAAATCCTCCACTCTATCCAGGCTTTGGACTGGCAAAGTGATCAAGACTCACTCAGGCAGAGTTACTTTGTTTTTGCTGATGTAACATCAGACTTTTAGCAGCTAAACCTCCCCTTCAGTGCAGCAGCCACACAGACCCACGTGAACCCAGACGGCGCTGTCCGGCCCGGCGCCGTGCTCCTCAGCTGGTACCGTGCCACCACTTTCTTGTAGCCCTTCTCCTCTGACGTGCATTCATAACCTCCGTCCTGCAGGGAGCTCATGCTTTCAATC…
A4IIX9	8.31816	0.21852	1.03626e-05	sp|A4IIX9|WDR37_XENTR`A4IIX9`Q:12-460,H:46-494`85.52%ID`E:0`RecName: Full=WD repeat-containing protein 37;`Eukaryota; Metazoa; Chordata; Craniata; Vertebrata; Euteleostomi; Amphibia; Batrachia; Anura; Pipoidea; Pipidae; Xenopodinae; Xenopus; Silurana.	.	SSETLESVSRMEDSKLPLSLRSNLLELFSQIEREFENLYLENIELRREIDTLNERLAAEGHTFDGADLAKGALKTKASHSTSQLSQKLKTTYKASTSKIVSSFKATAARAVCQLVKEYVGHRDGIWDLGITRNQPVVLGTASADHTAMLWSIETGKCLLKYMGHQGSVNSIKFHPNEQMALTASGDQTAHIWRYMVQLPTPQPVADVSTPCEDDVDFSDKDEADGEVEGPIDCPSIRVATTMLRSHQGVVIAADWLVGGKQVVTASWDRSANLYDVETSELVHSLTGHDQELTHCCTHPTQRLVVTSSRDTTFRLWDFRDPSIHSVNVFQGHTDTVTSAVFTTGDNVVSGSDDRTVKVWDLKNMRSPITTIRTDSAVNRISVSANQRIIALPHDNRQVR…	TTCTCATAACTTTACAACTTTATTATTAAAAAATTTCAACTTTTTCTTACACAATTTTTTTCATAATTTTACTACTTAATTTTTGTATTTTCCTCATATTTGCAGCTTCAAACTTGCTCAATTTTAATTTCCCATAATTTTAAAATTTCATTCTTGTAAAATTTTGACTTTTTTCTCATAGTTTTAGAACTTTGATAGTTTTTGACTTGTTTCTTCATAATTGTACAACTTTATAAGATTTTGACTTTTCATAATTTTACAATTTCGTTCTTGTAAAGTTTCTACTTTCTCATAAGATGTAAACTTTATTCTTTAAAATTTTGACTAATTTTCTATCTCTGTAAACGTAACGTTTTTCTCATAATTTTACGACTTTAATCTTGTACAATTTTGTCACTC…
Q6V4S5	8.29913	0.184892	0.000364102	sp|Q6V4S5|SDK2_MOUSE`Q6V4S5`Q:25-2234,H:4-2176`77.77%ID`E:0`RecName: Full=Protein sidekick-2; Flags: Precursor;`Eukaryota; Metazoa; Chordata; Craniata; Vertebrata; Euteleostomi; Mammalia; Eutheria; Euarchontoglires; Glires; Rodentia; Sciurognathi; Muroidea; Muridae; Murinae; Mus; Mus.	GO:0016021^cellular_component^integral to membrane`GO:0007155^biological_process^cell adhesion	MSRARGALAVQSGRSKRMEKCWGGSMWRATWIVFFSLLLHSAQAQDDVPPYFKTEPVRSQLHLERNRLVLTCMAEGSWPLEFKWIHNNTELTRFSLEYRYLIPSLDRSHAGFYRCIVRNRVGALLQRRTEVQVAFMGSFEEGERNQSVSQGEGAVVPAPRIRSFPQPQVTWYKDGHKIPPTSRIAITLDNTLVILSTVAPDAGRYYVQAVNDKNGENKTSQPITLSVENVGGPADPIAPTIIIPPRNTSVVTGTSEVTMECVANARPLIKLSISWRKNGVLVSSGLSDYNRRLTILSPVVSDAGYYECEAVLRSSSVPSVSAGAHLHVLEPPQFIKEPDKHITAEMEKVVDIPCQARGVPQPDIVWYKDALPIDPVKTPRYRVLVGGSLQVNGLLPDDT…	GTACTGTGACCATATATTCATTCAGATGCTGCATGATAAGCCGTTGCTGCGCACAATGAAGTCACCCCACAGAAAGAAAAAAAGAAAAGAAATAAACAAAAAAGGAAGGAAGTAGATGGCCTCTTCATCTGCTTTTTGAGCAATGGAAGCTAGGAACACAGCACTGAGTCTTCACTATAGCGTAACGAGTGGCGGGCGGAGGGATGACGTCATCCTCCAGGTGGGTCTGAAGTTGCTGCAGGACAAATCCTTTGTATAAACATACAGTGAATGAAGCTTTGCGTTCTCACACTCGTGCACACACCAGCACAGTCACACCTGAATAGCACACAATAGGGAAAGTAGTGAAGCAATTCAATGACATCATCTCTTGTCTATAGTGATAGTGGTCTGTGAAGC…
O60896	8.29278	0.420184	1.20376e-05	sp|O60896|RAMP3_HUMAN`O60896`Q:41-164,H:24-147`49.19%ID`E:2e-30`RecName: Full=Receptor activity-modifying protein 3; AltName: Full=Calcitonin-receptor-like receptor activity-modifying protein 3; Short=CRLR activity-modifying protein 3; Flags: Precursor;`Eukaryota; Metazoa; Chordata; Craniata; Vertebrata; Euteleostomi; Mammalia; Eutheria; Euarchontoglires; Primates; Haplorrhini; Catarrhini; Homini…	GO:0009986^cellular_component^cell surface`GO:0005887^cellular_component^integral to plasma membrane`GO:0005764^cellular_component^lysosome`GO:0043235^cellular_component^receptor complex`GO:0015026^molecular_function^coreceptor activity`GO:0008565^molecular_function^protein transporter activity`GO:0004872^molecular_function^receptor activity`GO:0006816^biological_process^calcium ion transport`GO:…	MDTNELRVFKLFLVGVFVNAWMMRGLSATDTFSVEPTTPWRRKICNESRLQWEVEVCGDEFKRSMARIDPYYWCNVTHFIREYHLFTLCTESKSQNVNCYWPNPLVESYIIRIHKHFFSNCTWEQVVWFDPPDDTLAILILIPVFLTLAMIALVVWCSKRSDLLA*	TTTGGTGGTAACATGTTTTTTTTATTAATAAAACTACCTTTATTAACAGTATACATAGGTGCAAGTTGGCAGATGGAGTGATGGTTCAATAGAAAGTGAAAGATTAGGTTTTGTAGGGCATTTCAAAGAAGCAATAAAATACATCGATGTGATCCAACTTGTTGAGAATGAAAGTGTTGAGAAATACTGGAGAGCAAACACAGATACAGCAGACAGCACAGACGCAGAGCAGAACTGTACAGCACGAGGTCTCATTGTCAGTTCATAATTATTGCATCTGTTGAGAACCTCCCATGTGACTATTAACAGTTTATTAACAACAGTATAAGTTAACGTCCTCTGAAACAGTCCTTTGGAGCACACAGAGAGTTTGGAATTGTTGTGCCGTCTTTGGCGTGA…
O94806	8.25604	0.260923	0.000396543	sp|O94806|KPCD3_HUMAN`O94806`Q:6-877,H:16-890`81.11%ID`E:0`RecName: Full=Serine/threonine-protein kinase D3; EC=2.7.11.13; AltName: Full=Protein kinase C nu type; AltName: Full=Protein kinase EPK2; AltName: Full=nPKC-nu;`Eukaryota; Metazoa; Chordata; Craniata; Vertebrata; Euteleostomi; Mammalia; Eutheria; Euarchontoglires; Primates; Haplorrhini; Catarrhini; Hominidae; Homo.	GO:0005737^cellular_component^cytoplasm`GO:0016020^cellular_component^membrane`GO:0005634^cellular_component^nucleus`GO:0005524^molecular_function^ATP binding`GO:0046872^molecular_function^metal ion binding`GO:0005543^molecular_function^phospholipid binding`GO:0004697^molecular_function^protein kinase C activity`GO:0035556^biological_process^intracellular signal transduction`GO:0007205^biological…	MSASSPPALPRPFLHCLQPHHPPGQIYQRLSNGSHNTPSPTNSRSSFHGVSFLLQIGLTRETVNLEASDLSLASVKDLVCSIVDQKFPECGFFGMYDKILLFRHNLNDENILQRLTSVEDIHEGDLIEVVLSAQATVEDFQIRPHALYVHSYKAPTFCDYCGEMLWGLVRQGLKCEGCGLNYHKRCAFKIPNNCTGVRKRRLSNVSLPGPSLSVPRPLPTENAVVVPDEQQRSHQEAGKRILSWSGRPIWMDKMEKTRVKVPHTFAIHTYTRPTICQYCKRLLKGLFRQGMQCKDCRFNCHKRCATKVPRDCLGEVDFNGEPASPGPDSDTTMDTMEVDSSDMEIGRGLDDPEEPSTPDGMFRIDSPFSDRDKDEEPIKTISSNIPLMRVVQSIKHTKR…	GTACATATTTTATAACTGCACATTTTGGAGTTTTTATTTCAAAACTGTGACTTTTGTTCTCGGTTTTGTGCAAATTCCACTACCGGGTTGATGCCCCTCAAGGGAAAACATAAACTTAGAGAAATGCCGGGTTCTTGTGGTGTTGGAATGGTTGGGAAAATGACTCAGAAAACACACATGAATGTCAGAAAAACAACAAATATTCCAAAACCACATGAATACAGATACACTTTTTGCACCTACACAAAGCTCCATGTATTTGTAGTGCACCATCTATGGGCACACACAGGATTAAAGGAAAAAATAAAACAATATGGATCATCAATATAATTTATTCCAGTTTGGTGGGCCAGATTAAATAGTTTCACGGACCACTCCTGCTGTAGACTCCTTCAGAAA…
Q594P2	8.25269	0.719452	6.93009e-09	sp|Q594P2|MYOC_FELCA`Q594P2`Q:1-276,H:203-489`59.93%ID`E:2e-104`RecName: Full=Myocilin; Flags: Precursor;`Eukaryota; Metazoa; Chordata; Craniata; Vertebrata; Euteleostomi; Mammalia; Eutheria; Laurasiatheria; Carnivora; Feliformia; Felidae; Felinae; Felis.	GO:0005929^cellular_component^cilium`GO:0005615^cellular_component^extracellular space`GO:0005791^cellular_component^rough endoplasmic reticulum	AEVTEVPAPDSNQDNAGCGDLLSVGEPVTHRRADNIAGKYGVWMQDPEPVSPYGPKMVWRIDTVGTEVRQLFGYEDLEQLSKGFPSKVLLLPDPLESTGATLYRGSLYYQRRLSRTLIRYELAAEHVAARRELPHAGFHGQFPYSWGGYTDIDLAVDEKGLWAVYSTSKAKGAIVISLLDPLSLVVRRSWETNMRKSSVANSFVICGKMYTVASYSATDSTINFVYDTETSQGKAVSIPFKNKYRYNSMIDYSLAQRKLFAWDNFHIVSYDIRMGHKLASRRKRDI*	GGCGGAAGTGACGGAGGTCCCTGCTCCTGACAGCAACCAGGACAACGCAGGTTGTGGTGACCTGCTTTCAGTTGGAGAGCCAGTCACTCACAGAAGAGCTGACAACATTGCAGGGAAATATGGAGTCTGGATGCAGGATCCTGAGCCGGTTTCTCCATATGGACCCAAAATGGTCTGGCGTATTGACACAGTTGGCACAGAGGTCCGGCAGCTGTTTGGATATGAAGACCTGGAGCAGCTCTCCAAAGGTTTCCCATCTAAAGTCCTTTTGCTGCCAGACCCCCTAGAAAGCACCGGAGCCACTCTCTACCGAGGCTCCCTGTATTATCAGAGAAGACTAAGCCGCACTCTGATCCGCTATGAGCTGGCTGCTGAGCATGTCGCTGCCCGCCGGGAGCT…
Q9Y2B0	8.24846	0.0301965	0.00034084	sp|Q9Y2B0|CNPY2_HUMAN`Q9Y2B0`Q:26-182,H:24-182`66.67%ID`E:1e-60`RecName: Full=Protein canopy homolog 2; AltName: Full=MIR-interacting saposin-like protein; AltName: Full=Putative secreted protein Zsig9; AltName: Full=Transmembrane protein 4; Flags: Precursor;`Eukaryota; Metazoa; Chordata; Craniata; Vertebrata; Euteleostomi; Mammalia; Eutheria; Euarchontoglires; Primates; Haplorrhini; Catarrhini; …	GO:0005783^cellular_component^endoplasmic reticulum`GO:0005887^cellular_component^integral to plasma membrane`GO:0010629^biological_process^negative regulation of gene expression`GO:0045716^biological_process^positive regulation of low-density lipoprotein particle receptor biosynthetic process`GO:0010988^biological_process^regulation of low-density lipoprotein particle clearance	MKENALLLTCCVVVCLFLSCSLAARQDMKCGACRALVDEMEWAISQIDPKKMIQRGSFRINPDGSQSIKEVPLARSEGNLLELMESVCERMADYGERTDPSTDRKSYIRVKSRTGEAMDLSEAALDSRVTSSLKFACETIVEHHEDEIIEFFAHETENVKDKLCSKRTDLCDHALNMAHDEL*	GCCCCAAATGCTGCTGGACTAACAGGCAGAGGACATGTTAGCATCAAACAAGTATATTTGAAGACAAAAGTTCAAATGGTACAAAAGGTTCTCAAACATTTCGATTCCTGATCTTTGTGCATGTACAGCTGTGAGCAGAAATCAATAACTGGAAACGACTCTTCATGCCCACTAAAGATCGCTCAATGAGGTCCAGTTCTTTAATTACTGCCAGGTAATTACAAATATACTATCACCTAACAACAATAATTATGTAAATATAACAGAAAATCAGGCCAATATTTGTTTAATTAAATAATTAGAGCTCTAACTTTTTATAGTTCTTTGATTTTGGATGATATGAAGCCATAACGCTTCATAATATACACATGGTGTTAAGGTACTTTGGAAGGAAGAATA…
P29341	8.24731	0.0294807	0.000340646	sp|P29341|PABP1_MOUSE`P29341`Q:1-626,H:1-636`81.35%ID`E:0`RecName: Full=Polyadenylate-binding protein 1; Short=PABP-1; Short=Poly(A)-binding protein 1;`Eukaryota; Metazoa; Chordata; Craniata; Vertebrata; Euteleostomi; Mammalia; Eutheria; Euarchontoglires; Glires; Rodentia; Sciurognathi; Muroidea; Muridae; Murinae; Mus; Mus.	GO:0010494^cellular_component^cytoplasmic stress granule`GO:0005681^cellular_component^spliceosomal complex`GO:0000166^molecular_function^nucleotide binding`GO:0008143^molecular_function^poly(A) RNA binding`GO:0006397^biological_process^mRNA processing`GO:2000623^biological_process^negative regulation of nuclear-transcribed mRNA catabolic process, nonsense-mediated decay`GO:0000184^biological_pro…	MNPSAPSYPMASLYVGDLHQDVTEAMLYEKFSPAGAILSIRVCRDMITRRSLGYGYVNFQQPADAERALDTMNFDVIKGQPVRIMWSQRDPSLRKSGVGNIFIKNLDKSIDNKALYDTFSAFGNILSCKVVCDENGSKGYGFVHFETQESAERAIEKMNGMLLNDQKVFVGRFKSRKEREAELGAQAKDFTNVYIKNFGEDMDDDKLKEIFSKFGNALSVRVMTDASGKNRGFGFVSFERHEDAQRAVDEMNEKELNGKAIFVGRAQKKMERQMELKRKFDQMKQDRTTRYQGVNLYVKNLDDTIDDERLRKEFSPFGMITSTKVMMEGGRSRGFGFVCFSSPEEATKAVTEMNGRIIATKPLYVALAQKKEDRQAHLVAQYMQRMASVRAAANPVINA…	CTTTTCCTTTTTTTTTTCTTTTTTAAATGCATAGTTCATTCTGTTTTTTGATTTTATCTTAAAGTTTCTCTTTTTTCTCAAAAATCCTCTCCTCTGTGAAGCTCTCTCGAGGTTTCCTGTTGAGAGAAATTACTTTATTAAAAAGCTGAAATATGGACGATGCATCCATCATCCAAACAGGAATGTTTGACCAAATATAGAAAAACTAAAAAGAACACACCTCAGATTCAGACACTCGAGACGGTGGATGAATTAGTCGCTGTCTTCTGTGCAGCCTCTTTGGCCTGGTGAGCTTGCAGCACAGCCATGGCCTCATCAATCTTTAAGCGGAGAGACTCTGGGGATTCCAGCATGTGGAGCAGCTCCGAGTTGTCGATCTCCAGCAGCATCCCAGTGATC…
O70566	8.22966	0.0237481	4.15566e-09	sp|O70566|DIAP2_MOUSE`O70566`Q:16-516,H:34-537`76.59%ID`E:0`RecName: Full=Protein diaphanous homolog 2; AltName: Full=Diaphanous-related formin-2; Short=DRF2; Short=mDia3;`Eukaryota; Metazoa; Chordata; Craniata; Vertebrata; Euteleostomi; Mammalia; Eutheria; Euarchontoglires; Glires; Rodentia; Sciurognathi; Muroidea; Muridae; Murinae; Mus; Mus.	GO:0003779^molecular_function^actin binding`GO:0030041^biological_process^actin filament polymerization`GO:0030154^biological_process^cell differentiation`GO:0007275^biological_process^multicellular organismal development`GO:0048477^biological_process^oogenesis	MDQASGGEDPNKPSKKKSGEDEGKNKKLRDRITSFRKTGMKKEKPLIQHPTDPLSPQTELPIPQPLFDDRSMNLSEKEINDLFEKMMEDMNLNEERKAPLRGKDLSTKREMVVQYISATAKSITGSKVAGGLRNSKHECTLSSQEYVHELRSGITEEKLLNCLESLRVSLTSNPVSWVNNFGHEGLGLLLDALEKLLDKKQQENIDKRNQHKLIQCLKAFMNNKDGLQKILGDERSLLLLARAIDPRQTSMMTEIVKILSAVCIIGEENILDKILAAMTIAAERNNKERFAPIVEGLENHEAQQLQVACMQLINALVTSPDDLDFRIHLRNEFLRCGLKKILPELKETEELDIQLKVFNENKEEDSIELSHRLDDIRAEMDDMNEVYHLLSNMVKDTAS…	GCCAGGGAGAGGTGGTGGAGGTGGTGGGGGGCATCCACCGGGTGGGGGAGGAGGTGGAGGAGGTGGAGGCGCTGCAGCCCCAGGTAACGGTGGTGGAGGTGGGGCTCCAGCTGCAGCTGGGCCTGCGGCAATCTGGGCCTCCAAGGCTTGCATCTTGGTCTGAAACTCTTTGATTTTCTCTTCCAACTTTTGACACTCAGCCTGGGCTTCCTGTCGTGCACTGAACTCCTCATCAAACTTTTTGGAGTATTCTGCAGCCTTCAGTTCACTCTCTTCAACTTTGGCTTTATCCACACACTGATCAATTAGGTGTGTGAAGTCCATCTCCAGTCTTCTACTATAGCCAAAGTCCGGATCCATCCCACTGCGGTGTAGAACTATCTGAGCCACACATTCCTC…
O60315	8.17594	0.0243313	1.31631e-05	sp|O60315|ZEB2_HUMAN`O60315`Q:1-1003,H:63-1082`71.46%ID`E:0`RecName: Full=Zinc finger E-box-binding homeobox 2; AltName: Full=Smad-interacting protein 1; Short=SMADIP1; AltName: Full=Zinc finger homeobox protein 1b;`Eukaryota; Metazoa; Chordata; Craniata; Vertebrata; Euteleostomi; Mammalia; Eutheria; Euarchontoglires; Primates; Haplorrhini; Catarrhini; Hominidae; Homo.	GO:0005737^cellular_component^cytoplasm`GO:0005730^cellular_component^nucleolus`GO:0046872^molecular_function^metal ion binding`GO:0019208^molecular_function^phosphatase regulator activity`GO:0043565^molecular_function^sequence-specific DNA binding`GO:0003700^molecular_function^sequence-specific DNA binding transcription factor activity`GO:0046332^molecular_function^SMAD binding`GO:0008270^molecu…	ASLTNPEASPRGEGHGLLTKDEEDDEMRDSGVEHIWQDNDMLSASVDGTDEMKYDFDALGSDATLQGVGNGTVKSMDCTSELEDFFAKRKLDDGDSHVVSIAECLRRGDTAIIYPEAPEELSRLGTPEATGPEENDLPPGTPDAFAQLLTCPYCDRGYKRLTSLKEHIKYRHEKNEENFACPLCNYTFAYRTQLERHMATHKPARDQHQLLNQEAGNRKFKCAECGKAFKYKHHLKEHLRIHSGEKPYECPNCKKRFSHSGSYSSHISSKKCIGLIAVNGRMRSNMKPGSSPTSASASPTNTAITQLRQKLENGKPLGLVDHNNHLNIKTEPLDFNDYKLMMASHGFGAPGPFLNGVGGDSPLGVHHSSTGQSPLQHLGLAGLDPQLLGYPGPLGNNLS…	GCACAGCTCGACTTTCTCTGAATTCCATCAATTTTCGTAACCGTCTATATCCCTTTTGGGCATGCAGGGTTGCTGGAGCCCATCCTAGCTACAGTTGGGTGAAATCCTCTGAACTCTTGGGACAAAGTGTTCAATTAAAGGCTAACTCAGATGAAACGTAACCACCAGATGAAGAAATCTGGTGAAATGATTTAGAAATGGGAGATGTAAAGACTGCAAATTAAAAGAAAGTTTGATTTATGAAGATGTTAAATAGTATTTAGAGAATGCCGTTCAAATTTGATTTTTTTAAGCGTTTCAATACAAAATCTTTAACATACTGTGAAAAGCCGCTTTTCTCCTTCAAAATCAACTGGAATTACGTTGATCATGTTAACAATTAAAAAAATGACAGTAATC…
O13166	7.92096	1.12472	1.41189e-05	sp|O13166|TLE2_DANRE`O13166`Q:1-755,H:1-761`92.81%ID`E:0`RecName: Full=Protein groucho-2; AltName: Full=Groucho-related Grg2;`Eukaryota; Metazoa; Chordata; Craniata; Vertebrata; Euteleostomi; Actinopterygii; Neopterygii; Teleostei; Ostariophysi; Cypriniformes; Cyprinidae; Danio.	GO:0005634^cellular_component^nucleus`GO:0006355^biological_process^regulation of transcription, DNA-dependent	MYPQGRHPAPHQPGQPGFKFTVAESCDRIKDEFQFLQAQYHSLKVEYDKLANEKTEMQRHYVMYYEMSYGLNIEMHKQTEIAKRLNAILAQIMPFLSQEHQQQVAQAVERAKQVTMTELNAIIGQQQLQAQHLSHAAHGPPVQLPPHPSGLQPPGIPPVTGSGSGLLALGALGSQAHLPVKDEKNHHDLEHSRENTNNSISPSESLRTSSEKHRSSSDYSLDSKKRKVEEKDSVSRYDSDGEKSDDLVVDVSNEDPATPRASPAHSPPENGIDKPRPPKKDTPNSPASVASSGSTPSSKAKELSHNDKSSTPGLKSNTPTPRNDAPTPGTSSTPGLRPILGKPPGMEALAAPALRTPLSYPTPFAMMGHHEMNGGLTSPGVYAGLHISPQMSAAAAAAY…	GGCTCGTGTCAATGAGGAGAAGAATTCTGAGCCTCTGAAGAAAGAAAAGACTATCCCCAAAATGTCAGGGGCGGTCACGGCTTCACTCGCGTCTTCCATGCGAGCCTTGCATATCAGTCACAGGCCAACAAAACAAGTAAGGCAATAATTAACTCAAACAGACTGATGACTTTGCCCAGTGGAGCAATAGATTTTAATACAACAGTTGAATCAACAGACCGAGCTGAAATCGCAGCTGTTCCTTTGTAAAACCAACAGTCCTCCAGTTGATAATTATCCTTTTATTTGTGTTTATGGAACACAGCCAGCGTTCAGTGATAGATCTTCCTTTTAGTTTTCTGTCGACTAGGGTCAGTGGGTCCACCTTCGTGCTTCTTCTTCCTTTTCCAGTTTGAAGAA…
Q6PD24	7.90339	0.843178	2.86029e-08	sp|Q6PD24|AN13D_MOUSE`Q6PD24`Q:104-646,H:1-517`68.74%ID`E:0`RecName: Full=Ankyrin repeat domain-containing protein 13D;`Eukaryota; Metazoa; Chordata; Craniata; Vertebrata; Euteleostomi; Mammalia; Eutheria; Euarchontoglires; Glires; Rodentia; Sciurognathi; Muroidea; Muridae; Murinae; Mus; Mus.	.	MGTRASCSFSSSSLPATAMAQEAFPLHVLVWNNQYLELDRELQKKGHDLERIDPRGRTPLELAVCLGHLESTRVLLRHAADPTYCNAQGWTILQEAVSTGDPELVQLVLQYRDFKRATERLAGIPELLSKLRQARDFYVEMKWEFTSWVPLVSKVCPSDVYRVWKSGSCLRVDTTLLGFEHMTWLKGRRSYIFKGGDDGAVVMEVDHEKQVVYTEPLVLSPRDAPSLLAAMQPSQENTAQRLTSPIVSTHLNTRNIAFERNKSGIWGWRSEKSEVVSGYEAKVYSATNVELVTRSRTEHLSDQDKSRCKGSKTPLQSFLGIAEQHTTHNGSNVSQCASPHNPTAITAEEYFDPEFNLNGRDIGRPIELTSKVQKFKATLWLSETHPLSLAEQVTPIIDL…	GCTGCAATTCAGAATTTGTAGTTTTTTTATTTTCAGTTTTATGAAGTTTACACACACACATACAACAAAACCCCTCCAAATCTGCATATTTCCAAAAATGACGGATCCTGTTTCTGATTTGCAGATAAAAGGTCGTTCAGTTCTGCTCAAAAGAAAATTCCAAACAGGTTAAAATTGTGCTCATTAAAAGGAAAAGAACTACAAATGAGGATAATCTTTACCTTTTCACACTTATGAGTAAAGAATATTTATCCACAGTTTTCTCACTTTCCTTTGCTATGCTGTAGGTTTAAAACCAAAAGACGGCTTGTCTGTGAACACCGTTCCATAGAAAAGAAAACAAAGATTTCCTTCCATCCTCATCACCCTTCCTCCATCCATCCTGATTCTTTCACATCT…
P08047	7.4289	1.26551	0.00111622	sp|P08047|SP1_HUMAN`P08047`Q:501-1068,H:146-785`47.21%ID`E:1e-126`RecName: Full=Transcription factor Sp1;`Eukaryota; Metazoa; Chordata; Craniata; Vertebrata; Euteleostomi; Mammalia; Eutheria; Euarchontoglires; Primates; Haplorrhini; Catarrhini; Hominidae; Homo.	GO:0005737^cellular_component^cytoplasm`GO:0005654^cellular_component^nucleoplasm`GO:0032993^cellular_component^protein-DNA complex`GO:0043425^molecular_function^bHLH transcription factor binding`GO:0003690^molecular_function^double-stranded DNA binding`GO:0035326^molecular_function^enhancer binding`GO:0046872^molecular_function^metal ion binding`GO:0042803^molecular_function^protein homodimeriza…	MSEEEWTVPDELFKDVKFYVVGDVDPKVVHLLKSGKGKEVSYNALATHIIAEDGDNPEVGESREVFDLPVVKPSWVILSVRCGDLLPVTGFSPESGQIFFGVTVCLPSLPDDLSSLWAYVTFYGGDCQLNLNKKVTHLVVKEPKGAKFECALKHPGIKIVTPDWITESVKDKNRKDETLYHPRLTYVEQEEEEESEAESSDMRSPSDGSYSPRRSRPSSGGSSGEESSPRRRPGPKRLNSVSPTSPRKPERRSERMFDDSDDDSPAEKEGTNLNWTPAEVVTPTAPVSTGTARRRAGPPGTRDLASSAGSGLINLCSTVPSVAGSEGATTAKTGSAAAAINQPTQQGVPVPDGIPGWSTAMITLRNITNTSDVQTANRPTNVAHIIQNLAGNQTKPLEP…	GCAGTGAACTGAGAAAGTAGGTTAACTTTTAATCAAGCTGTTGGCAATAGGTGTATAAACGTTATAAAATCCCTTATTTTAAAACACAGGGGAGGGAGGGCTTAAGAGCACTTGTCCAATGAACTTAAATCTTGTTTCTAAAAGGTTGTCATGGTACATTGCACAGGTTACAATTGTGTTTCACAAAGCATAGCTAGAAGGAAAAAAAATGCTATGCAAACCCTCTTTAGTAACAAAGTCCTGCTGTTTTTACATTTAGACAAAAAAAAGAAAACTGATACCTTTCATTCATACTTGTTCTTTTCCAGTTTTAACATATGCATCATATTTGTACAAGAAAAAACAAAGTTCATTGACCAAAGACAAACTTCTCTCCAGGCTCTTCTCTGGCAAAAGACA…
D3Z7P3	7.34889	0.498309	1.48328e-08	sp|D3Z7P3|GLSK_MOUSE`D3Z7P3`Q:117-558,H:107-555`82.85%ID`E:0`RecName: Full=Glutaminase kidney isoform, mitochondrial; Short=GLS; EC=3.5.1.2; Flags: Precursor;`Eukaryota; Metazoa; Chordata; Craniata; Vertebrata; Euteleostomi; Mammalia; Eutheria; Euarchontoglires; Glires; Rodentia; Sciurognathi; Muroidea; Muridae; Murinae; Mus; Mus.	GO:0005829^cellular_component^cytosol`GO:0005739^cellular_component^mitochondrion`GO:0004359^molecular_function^glutaminase activity`GO:0007610^biological_process^behavior`GO:0006537^biological_process^glutamate biosynthetic process`GO:0006543^biological_process^glutamine catabolic process`GO:0051289^biological_process^protein homotetramerization`GO:0002087^biological_process^regulation of respir…	CADATDCRELSLSAVHLPQSYSEPRISLSLPDRIEMLHFRVSTILKESFEATLKRPFPIFNQRSWLPTRRRRCCCFSTVSCDARLVSSRLNVLHAAPLRTAPCAAPVRLYCVKTEGAPVEPDDHVKKDGSGSEENEKRRNAGILPSLEDLLFYTVAEGQEKIPAHKFLTALKATGLRTGDPRLKECMDTLKETLKKTTDGVTLDRHLFKKCVQSNIVLLTQAFRKKFVIPDFQSFTSHIDELYENAKKLTGGQVADYIPQLAKFSPDLWAVSLCTVDGQRHTVGDTKVPFCLQSCVKPLKYAVAVNDHSTQYVHSFIGKEPSGLRFNKLFLNEDDKPHNPMVNAGAIVCTSLLKQGVSNAEKFDYVMNFLKKMAGNEYVGFSNATFQSERESGDRNFAI…	CTTGCGCAGACGCTACAGACTGTAGGGAGCTGTCGTTATCTGCCGTTCATTTACCACAGTCGTATTCGGAGCCACGCATTTCTCTCTCATTGCCTGACAGGATTGAGATGTTACATTTTAGGGTTTCGACAATCTTGAAGGAGTCTTTTGAAGCCACCCTCAAGCGTCCTTTCCCCATCTTTAATCAGAGGAGCTGGTTGCCGACCCGCCGCCGCCGCTGCTGCTGCTTCAGTACGGTCTCATGTGATGCCAGACTTGTGTCCTCTCGGCTGAATGTTCTCCACGCAGCTCCTCTCCGCACCGCACCCTGCGCCGCCCCGGTCCGCCTGTACTGCGTGAAAACTGAAGGCGCTCCGGTGGAGCCCGATGACCACGTGAAGAAAGATGGTTCTGGGAGCG…
Q90935	7.11629	2.14224	2.75155e-08	sp|Q90935|NEUS_CHICK`Q90935`Q:41-421,H:20-400`60.63%ID`E:6e-145`RecName: Full=Neuroserpin; AltName: Full=Axonin-2; AltName: Full=Peptidase inhibitor 12; Short=PI-12; AltName: Full=Serpin I1; Flags: Precursor;`Eukaryota; Metazoa; Chordata; Craniata; Vertebrata; Euteleostomi; Archosauria; Dinosauria; Saurischia; Theropoda; Coelurosauria; Aves; Neognathae; Galliformes; Phasianidae; Phasianinae; Gall…	GO:0005576^cellular_component^extracellular region`GO:0004867^molecular_function^serine-type endopeptidase inhibitor activity`GO:0030162^biological_process^regulation of proteolysis	FFIHPCSFTFRPHHKMLRLDVLALLLLLSILLPGYGCRAADIPEDTTSEFSFRLYHQLQAEGGQENIIFSPLSVAVSLGMVELGAGGASLEEIRQTVGFSSLLPGVEFSLLQNLTAALLDEDAHHVIRFANSLFLQEGVTFNPEFLHLMKKYFRAEAETVDFSESSAVAEQINNWVANHTESKIRSLLSAGDFSSVTRLTLVNAVYFRGSWKNQFRPENTRTFSFSRDDGSEVQTLMMYQQGDFYYGEFSDGSQEAGGVYQVLEMPYEGEDMSMMIVLPRQEVPLASLEPIIKAPLLEEWANNVKLQKVEVYLPRFKVDQKIDLKDTLQELGIKSIFTTEADLSAMTDGKDLYIGKAVQKAYLEVTEEGAEGAVGSGMIALTRTLVLYPQVMADHPFFF…	GGTATTTTTGAAAATGTTTCACTTTTTTTAGTGCAATGCCAAAACCTAACACTGTGTATTTTCCTCTTATAGAAGCACCTCCACTAACAGACTAAAATTAAATCTGCGGTAAATAAGTAAGCCTCAGGTTGAAGACTTATTAGGATTGATTGAACCTGATCCAGGTAATCAGCAGCAAAACGTGCAGGTACGGTGGGAGATCTTGAAGGATTACAACTGACCGTAGATCATCATCATGGTGGACATTTGCATGATTTTGTGCACCTGTAAAGTGACTGTAACACCTGAATCAACGAAACTGAACACCTTTGGCAATATACCGTAATAATATAGATGTTTATATTGAATTCATCGTATAATATTTGGTTATATCATCTTGTAAAGAGTATAAAACACAGT…
O13166	7.09678	1.47468	5.30732e-05	sp|O13166|TLE2_DANRE`O13166`Q:1-765,H:1-761`93.99%ID`E:0`RecName: Full=Protein groucho-2; AltName: Full=Groucho-related Grg2;`Eukaryota; Metazoa; Chordata; Craniata; Vertebrata; Euteleostomi; Actinopterygii; Neopterygii; Teleostei; Ostariophysi; Cypriniformes; Cyprinidae; Danio.	GO:0005634^cellular_component^nucleus`GO:0006355^biological_process^regulation of transcription, DNA-dependent	MYPQGRHPAPHQPGQPGFKFTVAESCDRIKDEFQFLQAQYHSLKVEYDKLANEKTEMQRHYVMYYEMSYGLNIEMHKQTEIAKRLNAILAQIMPFLSQEHQQQVAQAVERAKQVTMTELNAIIGVRGLPNLPLTQQQLQAQHLSHAAHGPPVQLPPHPSGLQPPGIPPVTGSGSGLLALGALGSQAHLPVKDEKNHHDLEHSRENTNNSISPSESLRTSSEKHRSSSDYSLDSKKRKVEEKDSVSRYDSDGEKSDDLVVDVSNEDPATPRASPAHSPPENGIDKPRPPKKDTPNSPASVASSGSTPSSKAKELSHNDKSSTPGLKSNTPTPRNDAPTPGTSSTPGLRPILGKPPGMEALAAPALRTPLSYPTPFAMMGHHEMNGGLTSPGVYAGLHISP…	GGCTCGTGTCAATGAGGAGAAGAATTCTGAGCCTCTGAAGAAAGAAAAGACTATCCCCAAAATGTCAGGGGCGGTCACGGCTTCACTCGCGTCTTCCATGCGAGCCTTGCATATCAGTCACAGGCCAACAAAACAAGTAAGGCAATAATTAACTCAAACAGACTGATGACTTTGCCCAGTGGAGCAATAGATTTTAATACAACAGTTGAATCAACAGACCGAGCTGAAATCGCAGCTGTTCCTTTGTAAAACCAACAGTCCTCCAGTTGATAATTATCCTTTTATTTGTGTTTATGGAACACAGCCAGCGTTCAGTGATAGATCTTCCTTTTAGTTTTCTGTCGACTAGGGTCAGTGGGTCCACCTTCGTGCTTCTTCTTCCTTTTCCAGTTTGAAGAA…
A4IIX9	7.04243	0.00746002	4.85959e-05	sp|A4IIX9|WDR37_XENTR`A4IIX9`Q:1-500,H:1-494`81.2%ID`E:0`RecName: Full=WD repeat-containing protein 37;`Eukaryota; Metazoa; Chordata; Craniata; Vertebrata; Euteleostomi; Amphibia; Batrachia; Anura; Pipoidea; Pipidae; Xenopodinae; Xenopus; Silurana.	.	MPVEGGSSSGSGSAARHPKQKRKAHSLSIRRTNSTEDRPPGVLRGDMLEGQDSKLPHALRNNLLDLFGQIEREFENLYIENLELRREIDSLNERLTGDGQTIEGGDPTKGALKAKASHSTSQLSQKLKTTYKASTSKIVSSFKATTGSRALCQLLKEYVGHRDGIWDLSVTRTQPVVLGTASADHSALLWSIETGKCLLKYSGHAGSVNSIKFHPTEQMALTASGDQTAHIWRYMVQLPAPQPPPDVTTLCDEDQDSSDREEGEVDGEGPCEVPTVRVATATLKSHQSVVIAADWLVGGRQVVTASWDRAANLYEVETSELVHTLTGHDQELTHCCTHPTQRLVVTSSRDTTFRLWDFRDPSIHSVNVFQGHTDTVTSAVFTTGDNVVSGSDDRTVKVW…	TTCTCATAACTTTACAACTTTATTATTAAAAAATTTCAACTTTTTCTTACACAATTTTTTTCATAATTTTACTACTTAATTTTTGTATTTTCCTCATATTTGCAGCTTCAAACTTGCTCAATTTTAATTTCCCATAATTTTAAAATTTCATTCTTGTAAAATTTTGACTTTTTTCTCATAGTTTTAGAACTTTGATAGTTTTTGACTTTTTTCTTCATAATTGTAAAATTTATAAGATTTTGACTTTTTATAATTTTACAATTTTATCCTTCAAAAACTTCCACTTTTTTGCCTCATAATTTTACAATTTCGTTCTTGTAAAGTTTCTACTTTCTCATAAGATGTAAACTTTATTCTTTAAAATTTTGACTAATTTTCTATCTCTGTAAACGTAACGTT…
A4IIX9	7.02097	1.65685	1.29207e-05	sp|A4IIX9|WDR37_XENTR`A4IIX9`Q:1-500,H:1-494`81.2%ID`E:0`RecName: Full=WD repeat-containing protein 37;`Eukaryota; Metazoa; Chordata; Craniata; Vertebrata; Euteleostomi; Amphibia; Batrachia; Anura; Pipoidea; Pipidae; Xenopodinae; Xenopus; Silurana.	.	MPVEGGSSSGSGSAARHPKQKRKAHSLSIRRTNSTEDRPPGVLRGDMLEGQDSKLPHALRNNLLDLFGQIEREFENLYIENLELRREIDSLNERLTGDGQTIEGGDPTKGALKAKASHSTSQLSQKLKTTYKASTSKIVSSFKATTGSRALCQLLKEYVGHRDGIWDLSVTRTQPVVLGTASADHSALLWSIETGKCLLKYSGHAGSVNSIKFHPTEQMALTASGDQTAHIWRYMVQLPAPQPPPDVTTLCDEDQDSSDREEGEVDGEGPCEVPTVRVATATLKSHQSVVIAADWLVGGRQVVTASWDRAANLYEVETSELVHTLTGHDQELTHCCTHPTQRLVVTSSRDTTFRLWDFRDPSIHSVNVFQGHTDTVTSAVFTTGDNVVSGSDDRTVKVW…	TTCTCATAACTTTACAACTTTATTATTAAAAAATTTCAACTTTTTCTTACACAATTTTTTTCATAATTTTACTACTTAATTTTTGTATTTTCCTCATATTTGCAGCTTCAAACTTGCTCAATTTTAATTTCCCATAATTTTAAAATTTCATTCTTGTAAAATTTTGACTTTTTTCTCATAGTTTTAGAACTTTGATAGTTTTTGACTTGTTTCTTCATAATTGTACAACTTTATAAGATTTTGACTTTTCATAATTTTACAATTTCGTTCTTGTAAAGTTTCTACTTTCTCATAAGATGTAAACTTTATTCTTTAAAATTTTGACTAATTTTCTATCTCTGTAAACGTAACGTTTTTCTCATAATTTTACGACTTTAATCTTGTACAATTTTGTCACTC…
P20585	6.65827	1.13032	2.12037e-07	sp|P20585|MSH3_HUMAN`P20585`Q:77-984,H:215-1124`58.64%ID`E:0`RecName: Full=DNA mismatch repair protein Msh3; Short=hMSH3; AltName: Full=Divergent upstream protein; Short=DUP; AltName: Full=Mismatch repair protein 1; Short=MRP1;`Eukaryota; Metazoa; Chordata; Craniata; Vertebrata; Euteleostomi; Mammalia; Eutheria; Euarchontoglires; Primates; Haplorrhini; Catarrhini; Hominidae; Homo.	GO:0032302^cellular_component^MutSbeta complex`GO:0000228^cellular_component^nuclear chromosome`GO:0005524^molecular_function^ATP binding`GO:0019237^molecular_function^centromeric DNA binding`GO:0003684^molecular_function^damaged DNA binding`GO:0008094^molecular_function^DNA-dependent ATPase activity`GO:0000406^molecular_function^double-strand/single-strand DNA junction binding`GO:0000404^molecul…	QEDTEENTPSSNISQRQGGMPPREASDQLKFTKVLQKPQECEDEERKEDAPDQRSCLSPFAKSGGAKGEKGAELGSRSSSSAPSKCSKSSYTPLEQQVVQLKQQHKDALLAVECGYKYRFFGDDAEIAAKELNITCHLDHNFMTCSIPTHRLFVHVRRLVSHGHKVGVVKQTETAAIKASGANRNALFTRQLSALYTKSTLVGEDVNQICSLEDVEEGSHGDIMVDPPDGFLLCISENWDKLKKQLTVGLVAVQPSTGDVFLDCFPDGSSRSELESRILKVNPVEILVPSDLSEETRRLLLSVTNASFQADDRARVERRDSAQFEYTSAINTVTQFYCRPQKEDSRSLGRVASFESPVICCLGPLIQYLQEFNLERVLRSESSFQRLSCESEAMILNAA…	GCCAGGTGGGAGAGTTTTCTTTAATTGTTAAACATCATCTACAGCTTTGTGGGTTCACATAATCAGCTCGTTTCACTGATTCGGTGTCATTTGATCATCAGAACCTGAAATAATTAGGTTTATCAAAACAGTCCAAAATTCCTTTTCTAAACGTTGTTTTCTGAGCCCGTTCGCTCACTGAAAGCGTTCCTTTTCTTTTGAGACATGATGAGATTTCCGCTGCAGTGAGGTCAAGAGTTTGACTGCAGCCATTGCATGAGGGATGGTTTGTCCGTGATGCTCCACATATCAGTGAGTAGTTTTTTAGATCTCCTTCTGGCCTCGACGACACTCTCCAGTTCTTGGGCTTTGCGAGCAGCGGTGCACAGAATGGGATCTGGAACGCCAGCGAGCTTGGCG…
P08183	6.4472	2.29431	7.94716e-05	sp|P08183|MDR1_HUMAN`P08183`Q:39-1286,H:32-1276`64.76%ID`E:0`RecName: Full=Multidrug resistance protein 1; EC=3.6.3.44; AltName: Full=ATP-binding cassette sub-family B member 1; AltName: Full=P-glycoprotein 1; AltName: CD_antigen=CD243;`Eukaryota; Metazoa; Chordata; Craniata; Vertebrata; Euteleostomi; Mammalia; Eutheria; Euarchontoglires; Primates; Haplorrhini; Catarrhini; Hominidae; Homo.	GO:0016324^cellular_component^apical plasma membrane`GO:0009986^cellular_component^cell surface`GO:0000139^cellular_component^Golgi membrane`GO:0016021^cellular_component^integral to membrane`GO:0046581^cellular_component^intercellular canaliculus`GO:0005524^molecular_function^ATP binding`GO:0042626^molecular_function^ATPase activity, coupled to transmembrane movement of substances`GO:0008559^mol…	MESTERKMSSAKQEQNGYLGKEKDEKKKGKKKEKAPKEPMVSPIAVFRFADGWDILMLITGTVMAIANGAVLPLMCIVFGDMTDSLINGVPPNMTEEYYNLTLINMTANIEEEMTVFAVYYSIMGAVVLVAAYLQVSLWTIAAGRQVKRIRKLFFHKIMQQDIGWFDINETGELNTRLTDDVYKIQEGIGDKVGMLIQSVSSFITAFVIGFTKGWKLTLVILAVSPALGISGALFSKVLTSFTSKEQSAYAKAGAVAEEVLSSIRTVFAFSGQNKEIERYHKNLEQAKKMGMKKAVSANIAMGFTFLMIYFSYALAFWYGSTLILSGEYTIGSVLTVFFVVIIGVFTMGQTSPNIQTFASARGAAHKVYHIIDNKPIIDSYSEDGFKPDFIKGDIEFSN…	CAAAACTTTAATAGATACATATCAGGACTTTCTACAAAAGATAAGTTATTAATAAACACGATTAGGACATTCATGTACATTAGCATAAACTCAAGATTTTTCTTTTTAATATACAGTATTTTTGGTTAAGCCGATCAGGCACTTTGGTTCTACCAATATTTTTGGTCTGATCATCCAAAGCTGTGATAAGGTGCCCGATACCCAAACACATTTCCTAAAGAACACGTAATAATATGCAGCGACGGTCCCAGTGTTAGTCAAACTTGGTGGTACACTATTGCACTTTTAGCATGAATTAAAGTGCATGAATCACTATTAAGTGCACTTAAGAAAAGTCATTTAAAATTAAGCGTGCTTCAAGTTGCTTTATCTTAACAAAAAAATTGTTTTTTTCTTTAG…
Q32PP3	6.30572	0.820879	0.000666561	sp|Q32PP3|PDK1L_DANRE`Q32PP3`Q:1-341,H:1-341`93.55%ID`E:0`RecName: Full=Serine/threonine-protein kinase pdik1l; EC=2.7.11.1;`Eukaryota; Metazoa; Chordata; Craniata; Vertebrata; Euteleostomi; Actinopterygii; Neopterygii; Teleostei; Ostariophysi; Cypriniformes; Cyprinidae; Danio.	GO:0005634^cellular_component^nucleus`GO:0005524^molecular_function^ATP binding`GO:0004674^molecular_function^protein serine/threonine kinase activity	MVSSQPKYELIQEVGRGSYGVVYEAVVKRTRARVAVKKIRCHSPENVELALREFWALSSIQSQHPNVIHLEECILQRDQLAQRMNHGSSSPLYLELVETSLKGEITFDPCCASYLWFVMDFCDGGDMNAYLLSRKPSRKTNTSFMLQLGSALAFLHRNQIIHRDLKPDNILISQACTPAGSPEPTLKVADFGLSKVCSASGLNPEEPASVNKCFLSTACGTDFYMAPEVWEGHYTAKADIFALGVIIWAMVERITFVDVETQKELLGSYVQQGSEIVPLGEALLENPKMELPIPARKKSMNSRMKQLLREMLSANPQERPDAVELELRLIRIACRELDWDT*	GGAAACACAACAGCGCTGAGATTGGAGACATCCAACCTGAACTCCGTCCATTGCGGTTCAATGGTTCAACGGTTCAGGTGGGCGTGTACTTTCTGCCGTTTCTGTTAAATAGTTTCCCTTCTTTCAGGCTGCAGGTGTACTGCTGCCGTGTTTCTAGCAGCAGCGATCGGACTCAGAGGGAGACCACAGTGAAAACTGAACACATCACTAAATTTGAAATTAAACCGAGTGGACCTTCAAAAGAACCATAAAATTGTTAAATTCAGGTGGATTCGTGTTTCGGTTTGCGAACCAGAACCCTGTTAGGTGTAAAAAAACCAAAACAGCCCCGCCCTGTTTAAACATGAGGTGACATTTAGGAGCAGCAACCAATCCAGGCCTCACGGAGGCGCTGGCGAG…
Q92010	6.22244	1.08052	1.82993e-05	sp|Q92010|ZBT14_CHICK`Q92010`Q:1-435,H:7-448`73.42%ID`E:0`RecName: Full=Zinc finger protein 161 homolog; Short=Zfp-161; AltName: Full=Zinc finger protein 5; Short=ZF5;`Eukaryota; Metazoa; Chordata; Craniata; Vertebrata; Euteleostomi; Archosauria; Dinosauria; Saurischia; Theropoda; Coelurosauria; Aves; Neognathae; Galliformes; Phasianidae; Phasianinae; Gallus.	GO:0005634^cellular_component^nucleus`GO:0003677^molecular_function^DNA binding`GO:0046872^molecular_function^metal ion binding`GO:0008270^molecular_function^zinc ion binding`GO:0006355^biological_process^regulation of transcription, DNA-dependent`GO:0006351^biological_process^transcription, DNA-dependent	MAETVKYVDEEHKSIFLKLLNEQRLEGEHCDIAVVVEDVKFRAHRCVLAACSNYFKKLFKKHEVDNSSVIEIDFIRSDIFEEVLNYMYTAKISVKKRDVNLMMSSGQILGIRFLDKLCSQKRDVSSEEKDKFPFDIVKMALPPEAQLAADSEVLDEQDDTPSGDELVETSANQELDKSPSAALRVQEAILKELTNEDVHKVACYDQDAVSEMETEPKELGTEHHATQTLAFADSIGDVKDEQAPGWSTAAGDMKFEYLLYGHREQLACQACGKTFLDESRLRKHEKLHSAERPFTCEICTKAFTTHAHLKEHLKIHTGFKPYRCEVCGKSFIRAPDLKKHERVHSNERPFACQMCEKAFKHKSHLKDHERRHRGEKPFVCPSCTKAFAKASDLKRHENN…	TAGCTGTTTAAAATCATTTATTTCTTCTCAATTGTGGGCAGCACAAGCACGCCGGTTTGTGCACGTGTCCATTCTGAGCTGCATTCGTTCAGTCTCAAACGGTTCTGCTCATGAAACTGAGCAGAACCGGTTTATGCACGGTACCACCCCCAAATGATCCCAGCACTTTGTTCCTACAGATGGATCAGACGAGCCTGACGTGTCAGTCACATCACATCACTGCAAGCCGACCCATCCAAGCGGAGGCGGTCCAAACTGTGAGGACACTGGGATCCCAGTCTGCACCAGAGCGGATCCAGACGTTCCCCCAGGTGCTAGGAGCAGCTCATGTTCTCCAGGTGTTGCTCCTCTGCTGCCATGGCAGCAGCCTGCAGGGCCTCAGTCTCACTCTGCAAAGGG…
P08047	6.10207	0.794175	0.00221174	sp|P08047|SP1_HUMAN`P08047`Q:501-1068,H:146-785`47.21%ID`E:1e-126`RecName: Full=Transcription factor Sp1;`Eukaryota; Metazoa; Chordata; Craniata; Vertebrata; Euteleostomi; Mammalia; Eutheria; Euarchontoglires; Primates; Haplorrhini; Catarrhini; Hominidae; Homo.	GO:0005737^cellular_component^cytoplasm`GO:0005654^cellular_component^nucleoplasm`GO:0032993^cellular_component^protein-DNA complex`GO:0043425^molecular_function^bHLH transcription factor binding`GO:0003690^molecular_function^double-stranded DNA binding`GO:0035326^molecular_function^enhancer binding`GO:0046872^molecular_function^metal ion binding`GO:0042803^molecular_function^protein homodimeriza…	MSEEEWTVPDELFKDVKFYVVGDVDPKVVHLLKSGKGKEVSYNALATHIIAEDGDNPEVGESREVFDLPVVKPSWVILSVRCGDLLPVTGFSPESGQIFFGVTVCLPSLPDDLSSLWAYVTFYGGDCQLNLNKKVTHLVVKEPKGAKFECALKHPGIKIVTPDWITESVKDKNRKDETLYHPRLTYVEQEEEEESEAESSDMRSPSDGSYSPRRSRPSSGGSSGEESSPRRRPGPKRLNSVSPTSPRKPERRSERMFDDSDDDSPAEKEGTNLNWTPAEVVTPTAPVSTGTARRRAGPPGTRDLASSAGSGLINLCSTVPSVAGSEGATTAKTGSAAAAINQPTQQGVPVPDGIPGWSTAMITLRNITNTSDVQTANRPTNVAHIIQNLAGNQTKPLEP…	GCAGTGAACTGAGAAAGTAGGTTAACTTTTAATCAAGCTGTTGGCAATAGGTGTATAAACGTTATAAAATCCCTTATTTTAAAACACAGGGGAGGGAGGGCTTAAGAGCACTTGTCCAATGAACTTAAATCTTGTTTCTAAAAGGTTGTCATGGTACATTGCACAGGTTACAATTGTGTTTCACAAAGCATAGCTAGAAGGAAAAAAAATGCTATGCAAACCCTCTTTAGTAACAAAGTCCTGCTGTTTTTACATTTAGACAAAAAAAAGAAAACTGATACCTTTCATTCATACTTGTTCTTTTCCAGTTTTAACATATGCATCATATTTGTACAAGAAAAAACAAAGTTCATTGACCAAAGACAAACTTCTCTCCAGGCTCTTCTCTGGCAAAAGACA…
P11497	5.84734	0.136236	0.000208471	sp|P11497|ACACA_RAT`P11497`Q:1-1818,H:537-2345`87.62%ID`E:0`RecName: Full=Acetyl-CoA carboxylase 1; Short=ACC1; EC=6.4.1.2; AltName: Full=ACC-alpha; Includes: RecName: Full=Biotin carboxylase; EC=6.3.4.14;`Eukaryota; Metazoa; Chordata; Craniata; Vertebrata; Euteleostomi; Mammalia; Eutheria; Euarchontoglires; Glires; Rodentia; Sciurognathi; Muroidea; Muridae; Murinae; Rattus.	GO:0005829^cellular_component^cytosol`GO:0005739^cellular_component^mitochondrion`GO:0003989^molecular_function^acetyl-CoA carboxylase activity`GO:0005524^molecular_function^ATP binding`GO:0009374^molecular_function^biotin binding`GO:0004075^molecular_function^biotin carboxylase activity`GO:0046872^molecular_function^metal ion binding`GO:0006084^biological_process^acetyl-CoA metabolic process`GO:…	WGYISVAAAGGLHEFADSQFGHCFSWGENREEAISNMVVALKELSIRGDFRTTVEYLIKLLETESFQHNSIDTGWLDRLIAEKMQAERPDTMLGIVSGALHVADVNLRNSVSNFLHSLERGQVLPAHTLLNTVDVELIYEGTKYVLTVTRQSPNSYVVIMNNSLAEVDVHRLSDGGLLLSYDGSSYTTYMKEEVDRYRITIGNKTCVFEKENDPSLLRSPSAGKLIQYTVEDGGHLFAGQCYAEIEVMKMVMTLTTSESGCIHYVKRAGAALEPGCIIAKLQLDDPSRVQQAELYTGTLPSIQAVALRGEKLHRVFHSTLDHLVHVMNGYCLPEPFFSAKLKEWVERLMKTMRDPSLPLLELQDIMTSVSGRIPPAVEKAIKKEMAQYASNITSVLCQF…	TGTGGGGCTACATCAGTGTCGCAGCAGCTGGAGGGCTGCATGAGTTTGCAGACTCCCAGTTTGGACACTGCTTTTCTTGGGGGGAGAACCGTGAAGAAGCCATCTCAAACATGGTGGTGGCTCTGAAGGAGCTGTCTATAAGGGGAGACTTCAGAACCACAGTGGAATACCTCATCAAGCTGCTGGAGACTGAAAGCTTTCAGCACAACAGTATTGACACAGGATGGCTGGACAGACTCATTGCAGAGAAGATGCAGGCGGAGCGCCCTGATACCATGCTGGGAATCGTGAGTGGTGCTCTGCATGTGGCAGATGTCAATTTGAGGAACAGCGTGTCCAACTTCCTGCATTCTTTGGAAAGGGGTCAGGTTCTCCCCGCTCACACACTACTCAACACTG…
Q15262	5.78036	0.470595	1.21443e-05	sp|Q15262|PTPRK_HUMAN`Q15262`Q:19-1437,H:25-1439`82.61%ID`E:0`RecName: Full=Receptor-type tyrosine-protein phosphatase kappa; Short=Protein-tyrosine phosphatase kappa; Short=R-PTP-kappa; EC=3.1.3.48; Flags: Precursor;`Eukaryota; Metazoa; Chordata; Craniata; Vertebrata; Euteleostomi; Mammalia; Eutheria; Euarchontoglires; Primates; Haplorrhini; Catarrhini; Hominidae; Homo.	GO:0005912^cellular_component^adherens junction`GO:0030424^cellular_component^axon`GO:0009986^cellular_component^cell surface`GO:0005911^cellular_component^cell-cell junction`GO:0030425^cellular_component^dendrite`GO:0005887^cellular_component^integral to plasma membrane`GO:0031256^cellular_component^leading edge membrane`GO:0043025^cellular_component^neuronal cell body`GO:0001750^cellular_compon…	MDSLLSVFLGLLFLFSSAGRVSGQLPTGSCTFDEGFSQCDYQQDPHDDFDWTHINTQEVPYISPDLPKGSYMYVDVSQHDVGQKAKFQLPVMKENDTHCIDFNYLLTSADGSSPGTLNVLVKVNKGPLANPIWNVTTYTGKDWLKAELAVSTFWPNEYQVIFEAEVSDGKTGFIAIDDIQVLSYPCDKSPHFLRLGDVEVNAGQNATFQCIATGRDTSSNKLWLQRRNGEDIPVALTKAINHRRFAASFHLKEVNGQDQDLYRCVTQSERGSGVSNFAGLIVKEPPHPIAPPQLLGVGPTYLLIQLNANSIFGDGPIILKEVEYRMTSGSWTETHAVNSPNYKLWHLDPDTEYEIRVLLTRPGEGGTGKPGPPLITRTKCAEPMRTPKRLKIAETRSRL…	AAACTAGTATTTTTTTTTTTACTGGTGAACCTGAGATTGTAAAAATATACCATCTGATAGTAACTGATGCGCCCCTGTTACTATCTCACACCACATAGTAACTTAGCAACTGATGAACATTAATTATTATCTCGTGTTCACCAGTTACAAAAAAACATATAGTTTGTCATTCGCACGAGATAATAACTGGTCAGCACAAGGTAGTAACTGGTGCGCAGCAGTTACTATCTGGTGCGTACCATACAATAACCTCACAACTGGTGAGCATTAGTTACTATCTCTTGCTCTCCAGTTTGAAAAAAAAAGTTTGTCGTGCACACCAGATAGTAATTGGTGCGCACCAGCTACTATGTTTTGCTCACAAGAAAAAAAAAGTTTCTCATGTGCACTTGCACCTCC…
Q92010	5.51603	0.382034	0.000105276	sp|Q92010|ZBT14_CHICK`Q92010`Q:1-435,H:7-448`73.42%ID`E:0`RecName: Full=Zinc finger protein 161 homolog; Short=Zfp-161; AltName: Full=Zinc finger protein 5; Short=ZF5;`Eukaryota; Metazoa; Chordata; Craniata; Vertebrata; Euteleostomi; Archosauria; Dinosauria; Saurischia; Theropoda; Coelurosauria; Aves; Neognathae; Galliformes; Phasianidae; Phasianinae; Gallus.	GO:0005634^cellular_component^nucleus`GO:0003677^molecular_function^DNA binding`GO:0046872^molecular_function^metal ion binding`GO:0008270^molecular_function^zinc ion binding`GO:0006355^biological_process^regulation of transcription, DNA-dependent`GO:0006351^biological_process^transcription, DNA-dependent	MAETVKYVDEEHKSIFLKLLNEQRLEGEHCDIAVVVEDVKFRAHRCVLAACSNYFKKLFKKHEVDNSSVIEIDFIRSDIFEEVLNYMYTAKISVKKRDVNLMMSSGQILGIRFLDKLCSQKRDVSSEEKDKFPFDIVKMALPPEAQLAADSEVLDEQDDTPSGDELVETSANQELDKSPSAALRVQEAILKELTNEDVHKVACYDQDAVSEMETEPKELGTEHHATQTLAFADSIGDVKDEQAPGWSTAAGDMKFEYLLYGHREQLACQACGKTFLDESRLRKHEKLHSAERPFTCEICTKAFTTHAHLKEHLKIHTGFKPYRCEVCGKSFIRAPDLKKHERVHSNERPFACQMCEKAFKHKSHLKDHERRHRGEKPFVCPSCTKAFAKASDLKRHENN…	TAGCTGTTTAAAATCATTTATTTCTTCTCAATTGTGGGCAGCACAAGCACGCCGGTTTGTGCACGTGTCCATTCTGAGCTGCATTCGTTCAGTCTCAAACGGTTCTGCTCATGAAACTGAGCAGAACCGGTTTATGCACGGTACCACCCCCAAATGATCCCAGCACTTTGTTCCTACAGATGGATCAGACGAGCCTGACGTGTCAGTCACATCACATCACTGCAAGCCGACCCATCCAAGCGGAGGCGGTCCAAACTGTGAGGACACTGGGATCCCAGTCTGCACCAGAGCGGATCCAGACGTTCCCCCAGGTGCTAGGAGCAGCTCATGTTCTCCAGGTGTTGCTCCTCTGCTGCCATGGCAGCAGCCTGCAGGGCCTCAGTCTCACTCTGCAAAGGG…
P32507	5.50018	0.951641	0.00105376	sp|P32507|PVRL2_MOUSE`P32507`Q:35-385,H:35-389`36.49%ID`E:1e-60`RecName: Full=Poliovirus receptor-related protein 2; AltName: Full=Herpes virus entry mediator B; Short=Herpesvirus entry mediator B; Short=HveB; AltName: Full=Murine herpes virus entry protein B; Short=mHveB; AltName: Full=Nectin-2; AltName: Full=Poliovirus receptor homolog; AltName: CD_antigen=CD112; Flags: Precursor;`Eukaryota; Me…	GO:0009986^cellular_component^cell surface`GO:0016021^cellular_component^integral to membrane`GO:0005886^cellular_component^plasma membrane`GO:0005915^cellular_component^zonula adherens`GO:0042803^molecular_function^protein homodimerization activity`GO:0001675^biological_process^acrosome assembly`GO:0051856^biological_process^adhesion to symbiont`GO:0032990^biological_process^cell part morphogene…	MARHDAQNWPESTKMIGLLCFVASIISQHGILGQRVKVDPEVTSYPGQSVNLRCSFSDPTGVQLSMVTWIYESKDGERKNIAVLHPSFDPNYPDSPVKGRVSFLAKEMTRPSIQITDLRMSDEGKYICEYATYPSGNEQGTTQLVMLAKPVNSASTVSVEAGTQKVTVAKCESANGLPAAKISWVTTAKGNETTTTKAGTDNTVTVTSEYRMVPTSADNGKDISCVVAHRTLEKPESFKMKLAVLFAPEVSIAGYDNNWYIGRTSTVLTCQATANPVPTSVLWKTMSGEMPDTVQISGNQLKVLKVDETVNTTFVCEVKNRLGTSKSQVTIVVREPSQKSSNAGVVAGIIIGVLLALLLIAAIIAVLITRSRRQQQGYRAKGDSDMKARIFGGGKKASK…	GCAGTCAATAATAAAAGCACATTTGGGGTAAGACCGTTTCGTTTGTGTTTGTATACAGTTAACTTGTATAGAAGAAGCACATGTGCCAGATTTGGCAGCAATCACAGCGCAGCAGTCAAGAATAAAGCACTCCGAAAAACATAAATTATAAAGCACAGCAAAATAATGGGAGAAGAGAAACTGTAATAGAAGAAAATAAATCCTTCATGCTAGCTGTCACCGAGTAATACACAAATGTGACACCATAAATTACTCATTCTTTTTCTCTGCTACATATTTATATATTTATACTATGTACACAAGAAGGGGTTTCTCTTTTTTTCTGTTAAGCGAGTGAGATGAGAGACGTTAAGGCTTTGATTAATCATCAGATGTCTGGAGCCAAAATATGTAGTGTTC…
Q5RBR7	5.46649	3.29937	5.71634e-05	sp|Q5RBR7|LYPA1_PONAB`Q5RBR7`Q:1-229,H:1-229`78.6%ID`E:6e-108`RecName: Full=Acyl-protein thioesterase 1; Short=APT-1; EC=3.1.2.-; AltName: Full=Lysophospholipase 1; AltName: Full=Lysophospholipase I; Short=LPL-I; Short=LysoPLA I;`Eukaryota; Metazoa; Chordata; Craniata; Vertebrata; Euteleostomi; Mammalia; Eutheria; Euarchontoglires; Primates; Haplorrhini; Catarrhini; Hominidae; Pongo.	GO:0005737^cellular_component^cytoplasm`GO:0008474^molecular_function^palmitoyl-(protein) hydrolase activity`GO:0006631^biological_process^fatty acid metabolic process	MCGNNMSAPLPAIVPAARKATAAVIFLHGLGDTGHGWAEAFAGIRIPHVKYICPHAPTMPVSLNMRMSMPSWFDIYGLSPDADEDEAGIKRASENLKTLIDQEVKNGIPSHRIILGGFSQGGALSLYTALTTQQKLAGVVALSCWLPLRKSFPQAAANSANKDMHVLQCHGDADPLVPLMFGTQTAEKMKSLINPANMAFKTYRGLPHSACPEEMVDVKRFIEKHLPAISDE*	TTTTTTTTTTTTTTTTTGCTGTCTGTTCTTTGAACATTCACAGAATATTCAACACTTTTCTGAAGCTTAAGCTTTTGCTTAAAATTAGCTTAAAATAAAACATTATTTTCAAAATTGCCCTCATAGAATGCTAAGAAAATTAAGGCATTAACAAAGCCCACACCTTTAGTTTACAAACACAAAACAAATTGCTTTAGATTAAAAAAAATCCAAACTAAAGAGAAACAACTAAACAATCTTACATTTTGAAAATCTTCTAATTGAATGAATCACTACTGCACTAAAATAAAGTAATTATGGCCCAAAAAAAAGTAAATCCTAAATTATAATGTATAGCCCTGGTTATCAAAATACATTTCCAGTACGAAATGGCTCATCTGAATGGCAAGATCTTCACAA…
Q5XPI4	5.40421	1.50082	6.75887e-06	sp|Q5XPI4|RN123_HUMAN`Q5XPI4`Q:1-1325,H:1-1307`73.91%ID`E:0`RecName: Full=E3 ubiquitin-protein ligase RNF123; EC=6.3.2.-; AltName: Full=Kip1 ubiquitination-promoting complex protein 1; AltName: Full=RING finger protein 123;`Eukaryota; Metazoa; Chordata; Craniata; Vertebrata; Euteleostomi; Mammalia; Eutheria; Euarchontoglires; Primates; Haplorrhini; Catarrhini; Hominidae; Homo.	GO:0005737^cellular_component^cytoplasm`GO:0016874^molecular_function^ligase activity`GO:0046872^molecular_function^metal ion binding`GO:0008270^molecular_function^zinc ion binding`GO:0016567^biological_process^protein ubiquitination	MTTRGGGTALTRRNYRLASDTDKPRTTGIVNEKLLSDYLHHVFPSAKPGATPATLRKPLGFQDLGAHLDRLLSEEEPAEDGRDQQVDGRVGPQPVVLDHTSGFEGLLFVDDDLLGVIGHSNFSSIRATTCVYKGKWAYEVLISSQGLMQIGWCTLNCRFNQEEGVGDTPDSYAYDGNRVRKWNVTTTNYGKSWAAGDIVSCLVDLDEGTITFCLNGQSLGTAFTNIKMGPGIAYFPAISLSFKESVAFNFGSRPLRYPVEGYLPLQDPPTADLTKAHKLLGFIKNVLSTSFDTQEEKLLEKDCATWKLHGEPTVLVTLAHIFNHFAPLMCKVYLVEDVLMNFLLGILEGGGSVDEHPLIQQLLDLFWLLMEDHEVNECLKQLMMSLLRAYRFSPIIPDL…	AAGTTAATTACCACAAAAATGACAGATTAGATCAAGGAAAGAAAACAGATGATGCTCTTGTGGTTCCATCCATTTAATTCTGCTGTCTATCCTGAAACGGGAAGGTTCTTCCTAAATCTTCAGCTCAGAGCCTCTTTTGGATCAGAACACCAAGCCAGCTCCCCTCACTCGTCTACATCTACAGTTTCACAACAAAACCCACAACAGACTCACACAAGCTTGAGTCTAACCAGCTTTCTCGTCACACGGCAGTCTGAAGGACACGTGTGCGTCGTGTGGTTCAGGTGTTGCTGTGAGGATCACTCACACACAACTTTTTATTTGCGTGCTTCATAAAAAAAGAAGTGTGTAGCTTCTTTGACAAAACATGTAACACATTTTAAAAATAAAAGTCAAACG…
A1E295	5.38392	3.82968	0.00122866	sp|A1E295|CATB_PIG`A1E295`Q:1-259,H:1-260`61.92%ID`E:4e-94`RecName: Full=Cathepsin B; EC=3.4.22.1; Contains: RecName: Full=Cathepsin B light chain; Contains: RecName: Full=Cathepsin B heavy chain; Flags: Precursor;`Eukaryota; Metazoa; Chordata; Craniata; Vertebrata; Euteleostomi; Mammalia; Eutheria; Laurasiatheria; Cetartiodactyla; Suina; Suidae; Sus.	GO:0005615^cellular_component^extracellular space`GO:0005764^cellular_component^lysosome`GO:0042470^cellular_component^melanosome`GO:0005739^cellular_component^mitochondrion`GO:0004197^molecular_function^cysteine-type endopeptidase activity`GO:0097067^biological_process^cellular response to thyroid hormone stimulus`GO:0006508^biological_process^proteolysis`GO:0050790^biological_process^regulation…	MCRLILLFVTGVLLSVGWARPQLPLLSSDMINFVNKLNTTWTAGQNFHNMDGSFVKGLCGTILRGPRLPEVVHDVEGIELPDSFDPREQWPNCPTLKQIRDQANCGSCWAFGAAEAISDRICIQSGGKISLEISAEDLLTCCDECGMGCFGGFPSAAWEFWTNKGLVTGGLFNSKVGCRPYTLAPCEHHVNGSRPPCQGEVETPKCVTQCIDGYSLSYPKDKHLGQRAYSIPSQQEQIMTELYKNGPVEAAFSVYADFLL	GAAAGAAGAAGACTCTCGACAGGTAACAGTTGGAGACTGAAGGATGTGTCGTCTGATCCTGCTCTTTGTGACGGGGGTGCTGCTCTCTGTTGGATGGGCGCGCCCCCAACTCCCTCTTCTCTCCTCTGACATGATTAACTTTGTTAACAAACTCAACACCACCTGGACGGCCGGTCAGAACTTCCACAACATGGACGGCAGCTTCGTGAAAGGACTGTGTGGGACCATCCTAAGGGGACCCAGGCTGCCAGAGGTGGTTCACGATGTTGAAGGCATTGAGCTTCCAGACAGCTTCGACCCACGTGAGCAGTGGCCCAACTGTCCTACACTCAAACAGATCAGAGACCAGGCCAACTGTGGATCCTGCTGGGCTTTTGGAGCAGCTGAGGCGATTTCTGA…
Q5VWN6	5.3306	0.995034	1.81849e-06	sp|Q5VWN6|F208B_HUMAN`Q5VWN6`Q:2449-2705,H:2163-2415`40.53%ID`E:1e-52`RecName: Full=Protein FAM208B;`Eukaryota; Metazoa; Chordata; Craniata; Vertebrata; Euteleostomi; Mammalia; Eutheria; Euarchontoglires; Primates; Haplorrhini; Catarrhini; Hominidae; Homo.	.	MESGTVGASCKGVLIPVSESTDTFQKTILNALQSAHLYEESKQFFRYKSAVLVKNPALEEKYNAFRAKRKNAGYTEDELKESYGFLLFDDASKANALGETGVLAGNSTCTILGDPTKGIYISMYSDCLDQNRWYHGKSGYIAIIKLTKGKVKKVLENYTEKFTEPTVGFDCHVSEQLASVSAKTSSFLAFERTQYYIYELLDDGSNRTELSPAASCPFAVVSFSYTDTKATPFVQQEKSELGKQVCHHIPWRGKLQIGSKFYNVDLRSTARAFLPTTLPPVVKVDVASMSDVQRLLPRAVFETSFTDEAFFDNLYCTLCDLVLSEAEDSSSFDQLLLEIKERDLALTISLKEKGFLILLHSSHFLRYEDTEFTNAGLLQGVFVFPESLAIRPDTKPVVK…	GCAAGTTTTAAAAGTCAAAATTCTCAGGAAAACATTTAAATACTCAAGAATGTTACCAAATAATTTACAATATATACATAAAACAAGAGAATTAAAACAGCATAGCTGCCAACATATTGGCAAATCTGCCACACCTTCAATTAATTCCAGTTTTGCGATAAATTGACACTGAAACTAGAAAAAGATTAAATAAAAATACAATAAAAATCTACAAGCAGTACTGTTGTTTAACGAAAGTTTTTCGTTGAAATATAACTAAAGCAATAAAAAATAGGTGAATAAATTCATTCCACAACAACCACACTTAGAATTGTTGTTTGGTCACGTAGTCAAACTTTTGTCAGTTTGACACCTCTGATTTTAAAGGCAGTCACTTGAAAACTTTGTCAGGAAAGTGTT…
Q26636	5.28131	5.68525	0.00047397	sp|Q26636|CATL_SARPE`Q26636`Q:1-195,H:144-339`68.37%ID`E:1e-78`RecName: Full=Cathepsin L; EC=3.4.22.15; Contains: RecName: Full=Cathepsin L heavy chain; Contains: RecName: Full=Cathepsin L light chain; Flags: Precursor;`Eukaryota; Metazoa; Ecdysozoa; Arthropoda; Hexapoda; Insecta; Pterygota; Neoptera; Endopterygota; Diptera; Brachycera; Muscomorpha; Oestroidea; Sarcophagidae; Sarcophaga; Boettche…	GO:0005764^cellular_component^lysosome`GO:0008234^molecular_function^cysteine-type peptidase activity`GO:0030154^biological_process^cell differentiation`GO:0007275^biological_process^multicellular organismal development`GO:0006508^biological_process^proteolysis	GSCWAFSATGSLEGQTFRKTGKLVSLSEQQLVDCSGDFGNMGCMGGLMDDAFRYIQSNGGIDTEESYPYEAEDRDCRYRPDAVGATCTGYVDVNSGDEDALKEAVATIGPISVGIDASHSSFQFYESGLYDEPDCSSSELDHGVLAVGYGSENGQDYWLVKNSWGLSWGDQGYIKMARNKSNQCGISTAASYPLV*	GGCTCCTGCTGGGCTTTCAGTGCTACTGGATCGCTGGAGGGCCAGACCTTCAGGAAGACCGGAAAGCTGGTTTCTCTGAGCGAGCAGCAGCTGGTTGACTGCTCTGGGGACTTTGGGAACATGGGCTGCATGGGTGGACTGATGGATGACGCCTTTAGGTACATCCAATCCAACGGAGGAATCGACACAGAGGAGTCCTACCCTTACGAGGCTGAGGATCGGGATTGCCGTTACAGACCAGATGCAGTCGGCGCCACATGCACTGGCTATGTTGATGTGAATTCAGGGGATGAAGATGCGCTGAAGGAGGCTGTGGCAACCATTGGACCGATATCTGTGGGCATCGACGCTTCTCATTCTTCCTTCCAGTTTTATGAGTCAGGGCTGTATGACGAGCCG…
O97490	5.06432	4.81394	0.00232519	sp|O97490|TRFM_RABIT`O97490`Q:1-225,H:479-705`55.07%ID`E:1e-71`RecName: Full=Melanotransferrin; AltName: Full=Membrane-bound transferrin-like protein p97; AltName: CD_antigen=CD228; Flags: Precursor;`Eukaryota; Metazoa; Chordata; Craniata; Vertebrata; Euteleostomi; Mammalia; Eutheria; Euarchontoglires; Glires; Lagomorpha; Leporidae; Oryctolagus.	GO:0031225^cellular_component^anchored to membrane`GO:0005576^cellular_component^extracellular region`GO:0005886^cellular_component^plasma membrane`GO:0008199^molecular_function^ferric iron binding`GO:0006879^biological_process^cellular iron ion homeostasis`GO:0006826^biological_process^iron ion transport	GFERTAGWNIPVSTLMERGLIRPEQCKIPQAVGEFFKQSCVPGANQRGLPSNLCDLCVGDSSGQNKCEKGKDLFDGYDGAFRCLAVGNGDVAFIKHTTIFQNTDGQSSESWASTLQSKDFQLLCPEGTKASASQYRYCNLARVPSHAVMVRPDTNIHAVYGLLEHAQKYFSSDTGSGFRMFDSQAYSGTDLIFKDSTVRIIAVGERKTYEEWLGQGYLDSLVDLKCGSSTIVASSAWLMLLTILGVTLTNIWM*	GAGGGTATCTTTGTTGCACATTGCTTTATTGTATTGTGTAGACAGACAACTTTATGTAGCAATACTTATGCAGACGCACTGGCCTGGCAACTAAATATTAGTCACAAGATACATCATTTCACATAGAAATAAATCTCTATCAGAAGAAAGAGAAGGCATTACTCTGACAGCATGAGTCAGTACATATACACTGATATGGCACCTGAACTTCATATAAAAATAAATCTCTCATCACTGGAAAAAATAACATTTTGAATCAACATTTTATAACAGCATCAAGGAGCATGTGTAGCTCAGAAGTCTGAGAACCTGAAAGTCTTGTGCTTCCCTAAAATTATGTAAGTCCATTTCTAAATAAAAAGAAAATTAATTTTCTTCAAGCAAAGAATAAATGAATTC…
O60911	5.03692	4.42657	0.000710448	sp|O60911|CATL2_HUMAN`O60911`Q:23-146,H:26-142`43.55%ID`E:1e-22`RecName: Full=Cathepsin L2; EC=3.4.22.43; AltName: Full=Cathepsin U; AltName: Full=Cathepsin V; Flags: Precursor;`Eukaryota; Metazoa; Chordata; Craniata; Vertebrata; Euteleostomi; Mammalia; Eutheria; Euarchontoglires; Primates; Haplorrhini; Catarrhini; Hominidae; Homo.	GO:0045177^cellular_component^apical part of cell`GO:0009897^cellular_component^external side of plasma membrane`GO:0043202^cellular_component^lysosomal lumen`GO:0005902^cellular_component^microvillus`GO:0043005^cellular_component^neuron projection`GO:0043204^cellular_component^perikaryon`GO:0030141^cellular_component^secretory granule`GO:0004177^molecular_function^aminopeptidase activity`GO:0004…	MKVLLAVAAVLAVANCASLSLEDLEFHAWKLKFGRTYSSPVEEAQRRQIWLNNRKLVLVHNILADQGIKSYRLGMTYFADMENEEYKRLITQGCLGSFNASLPRRGSAFFRLPENTDLPATVDWRDKGYVTDVKDQKACGSCWAFS	ACTGAAAGCCCAGCAGGAGCCGCACGCCTTCTGGTCCTTCACATCAGTAACGTATCCTTTGTCCCTCCAGTCAACAGTGGCGGGCAGGTCAGTGTTTTCAGGCAGACGGAAAAAGGCGGAACCACGGCGGGGCAGAGAGGCGTTGAAGGAACCCAGGCAGCCCTGAGTGATCAGCCTCTTGTACTCCTCGTTTTCCATGTCAGCAAAGTAAGTCATGCCGAGGCGGTACGACTTGATGCCCTGATCTGCCAGGATGTTGTGCACCAGCACCAGTTTACGGTTGTTCAGCCAGATCTGCCTTCGCTGAGCCTCCTCCACTGGAGAGCTGTAAGTCCTCCCAAACTTCAGCTTCCAAGCGTGGAACTCCAGGTCCTCCAGAGACAGACTGGCACAGTTGGC…
O12944	4.94196	3.37583	0.000458208	sp|O12944|RAD54_CHICK`O12944`Q:1-561,H:171-731`84.67%ID`E:0`RecName: Full=DNA repair and recombination protein RAD54-like; EC=3.6.4.-; AltName: Full=Putative recombination factor GdRad54; AltName: Full=RAD54 homolog; Flags: Fragment;`Eukaryota; Metazoa; Chordata; Craniata; Vertebrata; Euteleostomi; Archosauria; Dinosauria; Saurischia; Theropoda; Coelurosauria; Aves; Neognathae; Galliformes; Phasi…	GO:0005634^cellular_component^nucleus`GO:0036310^molecular_function^annealing helicase activity`GO:0005524^molecular_function^ATP binding`GO:0003677^molecular_function^DNA binding`GO:0004386^molecular_function^helicase activity`GO:0006281^biological_process^DNA repair	ADEMGLGKTLQCIALMWTLLRQSPDAKPEIDKAIVVSPSSLVRNWYNEVGKWLGGRVSPVAIDGGSKEEIDRQLVNFVSQNGLRVPTPILIISYETFRLHAAVLHRGRVGLVICDEGHRLKNADNQTYQALNAMSAQRRVLISGTPIQNDLLEYFSLVHFVNAGILGSAQDFKKRFELPILKGRDADASDADRRAGEEKLKELIGIVNRCLIRRTSDILSKYLPVKVEQVVCCRLTPLQAELYRLFLRQAKPLQTLQQGSMSVSSLSSITSLKKLCNHPTLIYDKCVSGEEGFDGALDLFPPGYSSKEVEPQLSGKMLVLDYILAMTRTTTSDKVVLVSNYTQTLDLFEKLCRSRRYLYVRLDGSMSIKKRAKMVERFNSPSSPDFIFMLSSKAGGCGL…	GGCTGATGAGATGGGTCTGGGGAAGACGCTGCAGTGCATCGCCCTCATGTGGACGCTGCTGCGCCAGAGCCCTGACGCCAAGCCGGAGATAGACAAGGCCATCGTGGTGTCGCCCTCCAGTCTGGTCCGGAACTGGTACAACGAGGTGGGGAAGTGGCTGGGGGGGCGAGTCTCACCGGTGGCCATTGACGGGGGCTCCAAGGAGGAGATTGACAGGCAGCTGGTGAACTTTGTCTCCCAGAACGGGTTGAGGGTTCCCACGCCCATCCTGATCATCTCCTACGAGACGTTCCGGTTGCACGCTGCTGTGCTGCACCGCGGCAGGGTGGGGCTCGTGATCTGTGACGAGGGACACCGACTCAAGAACGCCGACAACCAGACGTATCAGGCACTGAATGC…
Q9I8L5	4.90054	3.12942	0.00038176	sp|Q9I8L5|FA10A_DANRE`Q9I8L5`Q:1-126,H:1-126`79.37%ID`E:3e-56`RecName: Full=Fatty acid-binding protein 10-A, liver basic; Short=Zf-FABP10; Short=Zf-Lb-FABP; AltName: Full=Fatty acid-binding protein, liver; AltName: Full=Liver bile acid-binding protein; Short=L-BABP; Short=z-L-BABP; AltName: Full=Liver-type fatty acid-binding protein; Short=L-FABP; Short=Liver-type FABP;`Eukaryota; Metazoa; Chorda…	GO:0005737^cellular_component^cytoplasm`GO:0032052^molecular_function^bile acid binding`GO:0005215^molecular_function^transporter activity	MDFNGSWQVYSQENYEEFLRAMELSEDIIKLAKDVKPVTEIKQTGNDFVITSKTPGRTVTNSFTIGKEAEITTMDGKKLKCVVNLEGGKLVCKTGKFSHVQELKGGEMVETLTVGSTTLIRKSKKM*	GCACATTTTTTATTAAAAAGGTGTTTTTTGTTGTCAAATTCACATCTTTTTGCTTTTCCTAATGAGTGTTGTTGAACCAACTGTCAAAGTCTCAACCATTTCTCCTCCTTTGAGCTCCTGCACGTGGGAAAATTTGCCAGTTTTGCAGACCAGTTTGCCCCCCTCCAGGTTGACAACACACTTTAGCTTCTTGCCATCCATGGTGGTGATTTCAGCCTCCTTGCCGATGGTGAAGGAGTTGGTCACAGTTCTTCCAGGTGTCTTGGAGGTGATGACGAAGTCATTGCCTGTCTGTTTGATCTCAGTAACTGGCTTGACATCCTTGGCCAGCTTAATGATATCTTCCGACAATTCCATAGCCCTGAGGAACTCCTCATAGTTCTCCTGGGAGTACACCTG…
O97490	4.69194	3.4801	0.00676681	sp|O97490|TRFM_RABIT`O97490`Q:7-479,H:7-480`47.92%ID`E:1e-130`RecName: Full=Melanotransferrin; AltName: Full=Membrane-bound transferrin-like protein p97; AltName: CD_antigen=CD228; Flags: Precursor;`Eukaryota; Metazoa; Chordata; Craniata; Vertebrata; Euteleostomi; Mammalia; Eutheria; Euarchontoglires; Glires; Lagomorpha; Leporidae; Oryctolagus.	GO:0031225^cellular_component^anchored to membrane`GO:0005576^cellular_component^extracellular region`GO:0005886^cellular_component^plasma membrane`GO:0008199^molecular_function^ferric iron binding`GO:0006879^biological_process^cellular iron ion homeostasis`GO:0006826^biological_process^iron ion transport	RESGAMAMWTTVGTLLVLTHMVLSQSTIRWCTISEPEQRKCQAMSQAFSGVSIRPSLSCVSGPTIEGCIQKLQDKTVDALSMSGSDIYNAKKTASFKIAASESMNGETASYYAVAVVKKSNSDININNLAGKRSCHTGKDRTAGWKMPVGYLMDRGYMSVMGCNIPQGVADFFSASCIPGANEPGDPPSLCQLCKGDASGQHKCEMSTDEQYYSYEGAFRCLVEDAGQVAFIKHTTVGENTDGNGPDWANSLISADYELLCQDGTRAAVSQWKRCHLVRIPFRAVVVNSGITPSVVFSMLQEGLEKSGFKMFSSSDYGGGAVLFSDLTTTFEHVTSEEPATWMGDDYYDAMKATDCKPADIPAALRWCVLSSGEQQKCADMAVAFQQQSLTPNINCIHG…	GAGAGAGAGTGGAGCCATGGCCATGTGGACGACCGTGGGAACTCTGCTGGTGTTAACACATATGGTGCTGAGCCAAAGCACCATCAGGTGGTGCACCATCTCAGAACCAGAGCAGAGGAAGTGTCAGGCCATGTCGCAGGCGTTCTCCGGAGTCTCCATCCGGCCCTCTCTGAGCTGCGTCAGCGGACCCACCATCGAGGGATGCATCCAGAAACTCCAGGATAAAACGGTGGATGCCTTGTCCATGTCTGGCTCTGACATCTACAATGCAAAAAAAACTGCCTCCTTCAAGATTGCTGCAAGTGAATCAATGAATGGAGAAACTGCCAGCTACTACGCTGTGGCTGTGGTGAAAAAGTCCAACTCTGACATCAACATCAACAACTTAGCAGGAAAGCG…
P79820	4.6499	4.04599	0.0150511	sp|P79820|P53_ORYLA`P79820`Q:1-339,H:1-349`80%ID`E:3e-150`RecName: Full=Cellular tumor antigen p53; AltName: Full=Tumor suppressor p53;`Eukaryota; Metazoa; Chordata; Craniata; Vertebrata; Euteleostomi; Actinopterygii; Neopterygii; Teleostei; Euteleostei; Neoteleostei; Acanthomorpha; Acanthopterygii; Percomorpha; Atherinomorpha; Beloniformes; Adrianichthyidae; Oryziinae; Oryzias.	GO:0005737^cellular_component^cytoplasm`GO:0005634^cellular_component^nucleus`GO:0046872^molecular_function^metal ion binding`GO:0003700^molecular_function^sequence-specific DNA binding transcription factor activity`GO:0044212^molecular_function^transcription regulatory region DNA binding`GO:0006915^biological_process^apoptotic process`GO:0007049^biological_process^cell cycle`GO:0051262^biologica…	MDPVSDVPGSQDSFQELWQNVCPPPLGNDPTGSWLPPGEMLPFGEDLSGTFDDNLFNIPLEHIAITDVNPPPTTVPVTTDYPGDYQLALRFQKSGTAKSVTSTFSETLNKLYCQLAKTSPVEIRVSREPPKGAVLRATAVYKKTEHVADVVRRCPHHQNEDSVEHRSHLIRMEGSQLAQYFEDPFTKRQSVTVPYEPPQPGSEMTTILLSYMCNSSCMGGMNRRPILTILTLETEGMVLGRRCFEVRVCACPGRDRKTEEENRQKSTQPKKRKMTPNTSSAKKTKSHSSGEEEDKEVFHLRVVGRERYEMLKKINDGLELLDKEGNKVPTKIPSSGKKLLHKTDSE*	GAAATCCCCAAACAGCGTGTTCGACGCATACGCCGCAGTCTCCAGTCCGATTCAAAATATTTTGCCTTTTGCTAAATCTTTCCAGACTCCTGAAGAGTAAAAGTGTCTTTTTTCCCGGTGCATCTGCTGACCAACAAAGTTGAACCGTCCTCTCCCTTCTGAGCTGGGAAATGGATCCTGTGTCTGACGTGCCGGGGAGCCAGGATTCTTTTCAGGAATTATGGCAGAATGTTTGTCCTCCTCCTTTGGGAAATGATCCTACTGGGTCATGGCTGCCACCTGGAGAAATGTTGCCCTTTGGAGAAGACCTCAGCGGTACGTTTGATGACAATCTTTTCAATATACCGCTGGAGCACATTGCCATCACCGACGTGAACCCCCCGCCCACCACGGTCCCAG…
A3KPR5	4.62155	0.199524	0.00016672	sp|A3KPR5|CYAC3_DANRE`A3KPR5`Q:42-287,H:1-247`66.4%ID`E:8e-90`RecName: Full=Cytochrome b ascorbate-dependent protein 3; EC=1.-.-.-;`Eukaryota; Metazoa; Chordata; Craniata; Vertebrata; Euteleostomi; Actinopterygii; Neopterygii; Teleostei; Ostariophysi; Cypriniformes; Cyprinidae; Danio.	GO:0016021^cellular_component^integral to membrane`GO:0031902^cellular_component^late endosome membrane`GO:0005765^cellular_component^lysosomal membrane`GO:0046872^molecular_function^metal ion binding`GO:0016491^molecular_function^oxidoreductase activity`GO:0022900^biological_process^electron transport chain	MQAAGPPSRFPLQQLNAAASGSEIGPRPQKDEVSSFSDPSSMRSMMIFYLFYFLCLCLSVACVVCVCVWNSQWRGGFAWDGSSREFNWHPVLMVTGLVVLYGNGAVLYRIPLTWAHSKLPWKILHAALMFLSLILSIVGLCAVFNVHNAGNIPNLYSLHSWIGIAATALFAFQWVAGFAGFLLPWTPLSMRKLLKPVHVWLGGSILILSIAASISGINEKLFFVLKGTTNGTQPYSSLPPEAVVANSLGVLIVAFGLIVLKILSTSEWQRPDGSEDRTYAPLLRDESD*	GGGGGGGGGGAAAGTATTTTTATTCACAGTGAAAACAAGTCATTTTAAATATATTAACATCTCACACAGACTTTTTACTTAAGACCACCAGCTGCTTGTAGGGTTAGAAAGGTGGATGACTTTTGGCGAGCAGCTGTTCTTCAATCACTTTCATCACGTAGTAAAGGCGCGTACGTCCTGTCCTCAGAGCCGTCTGGTCTCTGCCATTCACTGGTGGACAGAATCTTCAGGACGATCAAACCGAAGGCGACGATCAAAACCCCCAATGAGTTCGCCACCACAGCTTCAGGCGGCAGGCTGGAGTACGGCTGAGTCCCGTTGGTTGTTCCTTTTAGAACGAAGAAGAGTTTCTCGTTGATGCCAGAGATGCTGGCGGCGATGCTGAGTATCAGGATGCTT…
Q5TYQ3	4.52207	1.63806	0.000262273	sp|Q5TYQ3|SELR1_DANRE`Q5TYQ3`Q:1-230,H:1-229`77.83%ID`E:3e-105`RecName: Full=Sel1 repeat-containing protein 1; AltName: Full=Beta-lactamase hcp-like protein;`Eukaryota; Metazoa; Chordata; Craniata; Vertebrata; Euteleostomi; Actinopterygii; Neopterygii; Teleostei; Ostariophysi; Cypriniformes; Cyprinidae; Danio.	.	MAGLINFEDEKEVKEFLDNLGVEYSFQCYKEKDPEGCQRLADYLEGVKRNYESAAQVLKHNCETNGHAESCYKLGAYHVTGKGGVTECLKTAYSFFIRSCDSGGKKSVDACHNVGLLAHDGRVMEEGPDLATAQKYYAKACDGGFAPSCFNLSTLFIEGNSKGLPPDMTLALKYANRACELGHVWGCANASRMYRLGDGTEKDEKKAEELKNRARELHGLEKERQLKFGE*	TACTATTATACATCACCTTTTAACAAAAGTTTTTTAAATGCATTTTTTTAAAGTGCTTTTTATTTTTTTCCTCCACTGAGCCCAACTTTCCTGTCATTTCTTTCCTTAGCCTTTTCTTTAAAAATTAAACATTTTAAATATCCTTTTTAACATTTTTTTTGTTTGCCTTTTCCATGATCCTGTTTGAATTGGTAAAAAATGCAACCATTTGATTTCTGGCATTTATCTTTACCTATGAACCATATCCTCTATAAGTCAGTGTTAGAGGACTTAAAAATTAAAACTATGAACTCAATTTATGTGATATTCTTATGCCATAAATAACAAATAAAACCCCAATTTAAATAGATTTATGCTCTACACAGTAATGATGAACAAAGATTCCACAATCTTGACTTT…
Q8CJB9	4.50922	0.0831141	0.000335358	sp|Q8CJB9|BRE1B_RAT`Q8CJB9`Q:4-989,H:2-1002`61.78%ID`E:0`RecName: Full=E3 ubiquitin-protein ligase BRE1B; Short=BRE1-B; EC=6.3.2.-; AltName: Full=RING finger protein 40; AltName: Full=Syntaxin-1-interacting RING finger protein; Short=Protein staring;`Eukaryota; Metazoa; Chordata; Craniata; Vertebrata; Euteleostomi; Mammalia; Eutheria; Euarchontoglires; Glires; Rodentia; Sciurognathi; Muroidea; Mu…	GO:0005737^cellular_component^cytoplasm`GO:0033503^cellular_component^HULC complex`GO:0043005^cellular_component^neuron projection`GO:0005634^cellular_component^nucleus`GO:0005886^cellular_component^plasma membrane`GO:0046872^molecular_function^metal ion binding`GO:0032403^molecular_function^protein complex binding`GO:0004842^molecular_function^ubiquitin-protein ligase activity`GO:0008270^molecul…	MSGAGGGKRPSGGDSPPGPPEKKSKKEEKTTTTLIEPIRIAGVSSTEEMDMKVIQFKNKKLCERLEQRQAMEDELREKIEKLEKRQATDDTTLLIVNRYWSQLEESVRLLRKRIEPEQPAPAPPTAPVTDPGAVDDSGLRLSSPRSEGPAPPVPEIQSESEPMDQQQVEERQEKNQEEQQPPLPAGSEELVTPTEPAPESKTDSSPPPPPLSENAKGFLAVLEQSTEEELSLHLQDRMQFSKDAIAQLVCVFDRLHSRIDSMCRAAQAADENHPDIIQNRTFLEENTRLHELSTFLHGRHHKMSMEYNELVDKMTSAETKVSEMETTVEDLQWDIEKLRNREQKLNKHLAEAMEQLKSGYSSSGSSGALVGGQITLNIQKFESLNAELEHNQELANSRM…	AAAAGACGTAAGACCAATCTGGCTCTCCTATATTGGAAACACGTTTTCTTTTTTTAATTTAAGATCCTGCTGAAGAGAACAGTTGAAACACTTTTAGGAGCTTTCAAAGACGTAGCACTGTGTACACAAACATCTGTGTTTATTAGCTAGACTCAATTAGATAAAGCACTATGTTTGGTCAGCAAATGGCAATGATGTGGTAAAAAAAACAACATTAAAACACGGAGAAACACTTTGAATAAATTCAGTTCTTTTTTTGTGTCCTCGAATCGCTCCTTTGGTTCCGTCTATCCTTTAGGTGATGTAAATGCGGTGAAAGTCATTGGCTCCGAAGGCACAGTTGCACTTGGGGCACTTCCTCTGCCGGGTGTCGTAGCGCATCTTCAGACATTCGTAGCA…
A9C3W3	4.50604	0.17155	0.00179	sp|A9C3W3|KAZRA_DANRE`A9C3W3`Q:1-216,H:578-786`54.63%ID`E:8e-56`RecName: Full=Kazrin-A;`Eukaryota; Metazoa; Chordata; Craniata; Vertebrata; Euteleostomi; Actinopterygii; Neopterygii; Teleostei; Ostariophysi; Cypriniformes; Cyprinidae; Danio.	.	LNVTKKFHQVSLLLGIELLHLLGFEKEALQARRAQCEHQNVDPLVWSSHRVMKWIRDIDLKEFADNLQNSGVHGAVLILDPTFNTDAMATALGIPTSKHMVRRHLIEEMRTLVPSARVDAKQEYECLGLGTPPTLLCQNSPGKLPSSNCKHTDEENLLKRRAVKPPLGFSPKNHGGRDQSCHRTFGSLPREVRDHTPPRAEGSPLRGCTSIEVTNV*	TTTTGAAAAGATGAATGTCCGAGGTTTATGTTCAGCTGGATGACATCACACGTTGGTGACTTCGATGCTGGTGCACCCCCGGAGTGGACTCCCCTCTGCTCGGGGCGGAGTGTGGTCTCGGACCTCTCGAGGGAGGGAGCCAAAGGTTCTGTGGCAGCTCTGATCCCGCCCACCATGGTTTTTGGGACTGAACCCTAAAGGAGGCTTCACAGCCCTTCTTTTTAACAGGTTTTCTTCGTCGGTGTGTTTGCAGTTGGAGCTGGGCAGTTTGCCTGGGGAGTTCTGGCACAGCAGGGTTGGGGGAGTTCCAAGGCCTAAACACTCATATTCCTGTTTGGCATCAACTCTCGCTGAAGGAACGAGCGTCCTCATCTCCTCAATGAGGTGCCGCCTGACCAT…
A3KPN8	4.50168	3.1947	0.000965097	sp|A3KPN8|TTC38_DANRE`A3KPN8`Q:10-465,H:10-465`69.52%ID`E:0`RecName: Full=Tetratricopeptide repeat protein 38; Short=TPR repeat protein 38;`Eukaryota; Metazoa; Chordata; Craniata; Vertebrata; Euteleostomi; Actinopterygii; Neopterygii; Teleostei; Ostariophysi; Cypriniformes; Cyprinidae; Danio.	.	MNVSSFRDCQAWRAEGLPLSTTSNEACKLFDATLTQYVKWTNDETLGGIEGCISAMKKADPNFVMGHVISTGLELVSTTSSPRLDERLASAVRRTVELANAQDVSPREKLHAKAVELFSRGNFPKACEVWEDILLDHPTDFLALKFAHDGYFYMGAQGLLRDSVARVLPHWKPHMPLYSYLKGLYSFGLLETRFYDQALKEAMEGLSLTPEDAWSVHSVAHVHEMKAEVDEGLKFMESREKDWQVSDMLASHNYWHWALYFMEKGQYESALQIYDTQVFKRCKASGAMLDIVDACSMLWRLEMEGVCVKDRWRELLHVTQPHTDDHVTVFNDLHFLMVSLGAKETETARRLLEGLQELAKEPGDNQQHQVAGSVGVSVCEAMMEYGQGNYSRAVELLYP…	CCGATTGTTCCCCCCTATTGTTTTTTCGTCTAATCTGAGGTCAAAAGTTTTCAAAAACTTACAACTTCACGTCGGCAATGAACGTGTCAAGTTTCAGAGATTGTCAGGCGTGGAGGGCTGAAGGTCTGCCGCTCTCCACCACCAGCAACGAGGCGTGTAAGCTGTTTGATGCCACGCTCACGCAGTATGTGAAGTGGACGAACGATGAAACCCTGGGAGGGATTGAAGGATGTATTTCAGCCATGAAGAAAGCGGACCCAAACTTTGTGATGGGTCACGTGATCAGCACTGGACTGGAGCTGGTGTCGACCACCAGTAGCCCCCGGTTGGACGAGCGCCTGGCCAGCGCCGTGAGGCGAACCGTGGAGCTCGCCAACGCCCAGGACGTCTCTCCCAGAG…
Q60928	4.46609	0.737692	0.000917598	sp|Q60928|GGT1_MOUSE`Q60928`Q:1-106,H:456-561`57.55%ID`E:8e-30`RecName: Full=Gamma-glutamyltranspeptidase 1; Short=GGT 1; EC=2.3.2.2; AltName: Full=Gamma-glutamyltransferase 1; AltName: Full=Glutathione hydrolase 1; EC=3.4.19.13; AltName: Full=Leukotriene-C4 hydrolase; EC=3.4.19.14; AltName: CD_antigen=CD224; Contains: RecName: Full=Gamma-glutamyltranspeptidase 1 heavy chain; Contains: RecName: F…	GO:0005887^cellular_component^integral to plasma membrane`GO:0003840^molecular_function^gamma-glutamyltransferase activity`GO:0016787^molecular_function^hydrolase activity`GO:0071260^biological_process^cellular response to mechanical stimulus`GO:0019344^biological_process^cysteine biosynthetic process`GO:0006750^biological_process^glutathione biosynthetic process`GO:0060427^biological_process^lun…	ILFDKDNKVKMVVGGSGGTKITTAIAQVILNTLFFDYDLEKAVSDPRLHNQLLPNTTEAEPDFDQNILNGLKAKNHNTEYLKSSGAVVQAVVRYKDGLRAQSDPRK	CATCCTTTTTGATAAAGACAACAAGGTAAAGATGGTTGTCGGTGGTTCTGGAGGAACAAAAATCACAACTGCCATTGCTCAGGTCATTCTGAACACACTGTTCTTTGACTATGACTTGGAAAAAGCTGTGTCAGATCCAAGACTTCACAACCAGCTACTGCCCAACACCACAGAAGCTGAACCAGACTTTGACCAGAACATCCTGAATGGTTTAAAAGCAAAAAATCACAACACAGAGTATCTCAAATCATCTGGAGCTGTGGTGCAGGCGGTGGTACGTTACAAAGACGGACTCCGTGCTCAGTCAGACCCCCGGAAG
P50616	4.42213	1.31156	0.000552497	sp|P50616|TOB1_HUMAN`P50616`Q:1-325,H:1-345`73.6%ID`E:4e-129`RecName: Full=Protein Tob1; AltName: Full=Transducer of erbB-2 1;`Eukaryota; Metazoa; Chordata; Craniata; Vertebrata; Euteleostomi; Mammalia; Eutheria; Euarchontoglires; Primates; Haplorrhini; Catarrhini; Hominidae; Homo.	GO:0005737^cellular_component^cytoplasm`GO:0005070^molecular_function^SH3/SH2 adaptor activity`GO:0003714^molecular_function^transcription corepressor activity`GO:0030514^biological_process^negative regulation of BMP signaling pathway`GO:0008285^biological_process^negative regulation of cell proliferation`GO:0045668^biological_process^negative regulation of osteoblast differentiation`GO:0007184^b…	MQLEIQVALNFIISYLYNKLPRRRVNIFGEELERQLKRKYDGHWYPEKPYKGSGFRCIHVGEKVDPVVEQAAKESGLDIEDVRNNLPQDLSVWIDPFEVSYQIGEKGAVKVLYVDDNGENGSELDREIKNSFNPEAQVFMPISDPAGASPESSSPSPPFGQSAAVSPSFMPRSAQPLTFTTATFAATKFGSTKMKSSSRSGAGGGGASSKAARASPTSNLGLNLLKQKAMSSSMHSLYGPGQPKSSALSPNAKEFVFSSLQGQASPGAVFPGEGSLGLGALQYSNAFDMFAAYGGLNDKSLMDGLNFSLSNMQYSNQQFQPVMAN*	CCGGTTCTACAGCTCATGAAGGGAAGCACAGCCCAGTTCAGCTGGAGTTTGTTTTATTAAAAAGATCAGGGTGCAAATATCAAATAAAAAAAAATAAAGACAAGCATATCATTTAGAAGCATTTAATACAAACTTAACAATATAAACTATTTCAGTCCCTCTTGACGTTAAGACACTGACTCAAAATACTTTGTTAGACCGTCTCATTTATCAAGTATTGCACAATGTAGGTACAAAATTAATATACGATTACATTTTGTCCATTATATAGCAAAAATCTTTAAACTCTTAACAGAAAATACAACTCTTATGTTTTTTCAAAAAAGCAAATATTCTTAAATCCCACCACTACGGAATATTCTGTACACAATCTTCAGGGTAGTCCATGTTTTTTTTCTT…
P55859	4.36917	1.74046	0.00127551	sp|P55859|PNPH_BOVIN`P55859`Q:8-286,H:4-282`62.37%ID`E:6e-108`RecName: Full=Purine nucleoside phosphorylase; Short=PNP; EC=2.4.2.1; AltName: Full=Inosine phosphorylase; AltName: Full=Inosine-guanosine phosphorylase;`Eukaryota; Metazoa; Chordata; Craniata; Vertebrata; Euteleostomi; Mammalia; Eutheria; Laurasiatheria; Cetartiodactyla; Ruminantia; Pecora; Bovidae; Bovinae; Bos.	GO:0005737^cellular_component^cytoplasm`GO:0005856^cellular_component^cytoskeleton`GO:0004731^molecular_function^purine-nucleoside phosphorylase activity`GO:0009116^biological_process^nucleoside metabolic process	MFPEANKGYSYDDCKATADWLLAQTDIKPRVGIVCGSGLGGLADLLKDQVAFNYKDIPNFPQSTVHGHAGRLVFGTLKGRACVCMQGRFHLYEGYAVQRITLPIRIFKLLGVETVILTNAAGGLNEDFKVGDIMVIKDHINLPGFAGNNPLVGPNDERFGVRFPCMSDAYDRELQQLGMDVGQELGYGDFLKEGVYCALGGPSFETIAECRMLQKLGVDAVGMSTVHEVVVARHCGMRVFALSLITNQAVVDYDSEEKANHEEVLQAGKQRGLQMEHLVSTMVTRIEHNNNYI*	AAAAAAATCCTTTAAACAATTGAAATTCACAGTAAAATCTACATTTTTTTTCTTCTTGGAAACTCTGAGCGCATTTTTCATTTATTTTTTTATTTTTATTTATCCTAAAAGAAAGTTTGAGATTTGATCTCCAGCGATGTTTCCAGAGGCAAATAAAGGCTACAGCTACGACGACTGCAAAGCCACTGCTGATTGGCTGCTGGCACAGACGGACATTAAGCCCAGAGTTGGTATTGTTTGTGGGTCGGGGCTCGGAGGACTAGCCGACCTGTTAAAGGACCAGGTGGCCTTCAACTACAAGGACATCCCCAACTTTCCTCAGAGCACAGTGCACGGGCATGCAGGACGGCTGGTGTTTGGCACCCTGAAGGGAAGGGCGTGCGTTTGCATGCAGGGTCG…
Q02817	4.33227	2.55045	0.00229579	sp|Q02817|MUC2_HUMAN`Q02817`Q:3-178,H:4985-5162`42.22%ID`E:2e-28`RecName: Full=Mucin-2; Short=MUC-2; AltName: Full=Intestinal mucin-2; Flags: Precursor;`Eukaryota; Metazoa; Chordata; Craniata; Vertebrata; Euteleostomi; Mammalia; Eutheria; Euarchontoglires; Primates; Haplorrhini; Catarrhini; Hominidae; Homo.	GO:0005796^cellular_component^Golgi lumen`GO:0070702^cellular_component^inner mucus layer`GO:0070703^cellular_component^outer mucus layer`GO:0016266^biological_process^O-glycan processing`GO:0043687^biological_process^post-translational protein modification	SDECCGKCVQKDCVIKFNGTQHLLTEGQTWSPPGNKCDQYTCVKNDDILTAIMSHIICPMFQEDNCEPDSIQTAANGCCKICVEKEKACKVVSMKTRVTHNGCQTEEEVDMPYCEGSCNTFTKYSEAAAAMQHSCSCCKETSFTNRTVDLLCLTGDKIPFTYMHVEECGCGHTGCTKPA	ATTCTGATGAGTGCTGTGGAAAATGTGTACAGAAAGACTGTGTGATCAAATTCAACGGTACCCAACATCTATTGACGGAAGGACAAACCTGGTCGCCACCTGGCAATAAGTGTGATCAATACACCTGTGTTAAGAATGATGACATTTTGACAGCTATCATGTCACACATTATCTGCCCGATGTTCCAAGAGGACAACTGTGAACCCGACTCGATTCAGACAGCAGCAAACGGGTGTTGTAAAATCTGTGTGGAGAAAGAGAAGGCCTGCAAGGTGGTGTCTATGAAAACTCGAGTTACACACAATGGCTGTCAGACTGAAGAAGAGGTGGACATGCCATACTGTGAAGGATCCTGCAACACATTCACCAAGTATTCTGAAGCAGCTGCTGCTATGCAAC…
Q8SPS7	4.31544	1.38043	0.00127749	sp|Q8SPS7|HPT_PIG`Q8SPS7`Q:1-137,H:199-344`38%ID`E:7e-22`RecName: Full=Haptoglobin; AltName: Full=Zonulin; Contains: RecName: Full=Haptoglobin alpha chain; Contains: RecName: Full=Haptoglobin beta chain; Flags: Precursor;`Eukaryota; Metazoa; Chordata; Craniata; Vertebrata; Euteleostomi; Mammalia; Eutheria; Laurasiatheria; Cetartiodactyla; Suina; Suidae; Sus.	GO:0005576^cellular_component^extracellular region`GO:0003824^molecular_function^catalytic activity`GO:0008152^biological_process^metabolic process	MSNKVTPIPLPERGQDGDRASQGSGVIAGWGWGIFLTPAASLKHLVLPLANHSDCKAEYERDPLTPAVDENMFCTGATAFQENVCFGDAGGALAVLDPQTGDAYAAGILSYDKPCNRHKYAVYMRVSSYLPWIHSVIRGDTDKSPALRSDTMSTMYSWQS*	TGAATGTTTCAAGTCTTGAGTTTTTACAACTAACTTACAGTTGATTTCAGAATGACTGCTGTTTGTTAAAGCTAATTTAAGGTCACAGGGAGCAGATGTGAAGAAAGTGGAGAATTTTAGGTAATTAGAGTCAACAATCCAGAACAGCAGAGAGTTTAGGAGACATGTTGAAGCAGATTTGATTGGAAAGGTTTCAGGTGTGACAAAAGAGTCTCAGCAAGAATGAAAGGTGGTCATCCACCCCGGCTTCCAGAATCAGTCTGACTGGGACAACGACCTGGCTCTTATCAAACTCAAACACCCAGTGATCATGAGCAACAAGGTGACCCCCATCCCTCTGCCAGAGAGGGGTCAGGATGGGGACAGGGCCTCACAAGGGTCAGGGGTCATAGCAGGCTG…
Q96DN0	4.23336	2.0037	0.00643217	sp|Q96DN0|ERP27_HUMAN`Q96DN0`Q:26-254,H:43-273`36.8%ID`E:7e-37`RecName: Full=Endoplasmic reticulum resident protein 27; Short=ER protein 27; Short=ERp27; Flags: Precursor;`Eukaryota; Metazoa; Chordata; Craniata; Vertebrata; Euteleostomi; Mammalia; Eutheria; Euarchontoglires; Primates; Haplorrhini; Catarrhini; Hominidae; Homo.	GO:0005788^cellular_component^endoplasmic reticulum lumen	MLFTLLQVFLMTFAVAEGKDNSILKLDDTKAVEAFVDSGEVVIIGFLEGEESHGYKELVEASKKVDSVPAAVSTEKEVWAAYNISSDTITLFRKADDWKSNIVLSEVQKFDLDSLVNFIITNEIRYITEYNQVTAVGLFNAEVRTHLVIFANRGSEEYSELKEKLAALAPEFTGKFLFVLINGALKSNFKAINYFGLTTKDLPRVGIYDGDSDMKWLLPEGEISTERVRDFCQSFLQGDLKNVKQAGHDPKTEL*	GGTCTTAGCTGTTGGGAGGCTGAAGGAGGTGAAAAGAGGCAGCACAGTGCTAATAGCTTTTTTGTGTTTAAATTAGTACAAAAAAAGGAAAAAAAATGCTGTTCACACTCTTACAGGTCTTCTTGATGACTTTCGCTGTTGCCGAAGGGAAAGATAACTCAATTCTCAAGCTTGATGACACAAAAGCTGTTGAAGCCTTCGTGGATTCTGGTGAAGTGGTGATCATCGGCTTCCTTGAGGGAGAGGAGAGTCACGGATATAAGGAACTTGTGGAGGCTTCAAAAAAAGTCGACTCCGTTCCGGCAGCAGTTTCTACCGAGAAGGAGGTGTGGGCTGCATACAACATCTCTTCAGACACCATCACCCTCTTCAGAAAAGCTGATGACTGGAAGAGTAACA…
Q3UV31	4.18871	1.08953	0.00211151	sp|Q3UV31|RN223_MOUSE`Q3UV31`Q:109-201,H:65-161`44.44%ID`E:4e-15`RecName: Full=RING finger protein 223;`Eukaryota; Metazoa; Chordata; Craniata; Vertebrata; Euteleostomi; Mammalia; Eutheria; Euarchontoglires; Glires; Rodentia; Sciurognathi; Muroidea; Muridae; Murinae; Mus; Mus.	GO:0016021^cellular_component^integral to membrane`GO:0046872^molecular_function^metal ion binding`GO:0008270^molecular_function^zinc ion binding	IPSEDIDTQRSFSYSTPGSDQCVPPSPPPKISTGQSFPPASHHQSVSSQTSLGQNVQPPDASLPLPAFTPTPSWGLTQDSLSTPNPYLPVDDNPPHQVTVDVPSPDLQPSPFSPQCSEECPELECSVCFSQFNNVFRCPKMLHCKHTFCLECLARINVKSAEPNAILCPLCRGLTPLPTLGLPKLTTDSDVLSYLPAAMQRVYSIRFIRNKGKLQVKRAPERGRSSVTSLGPTNRTLNVGLPSSTAQGSEARGVDGMVLRMTGRPVCRALFLVFVVVIIVVLTAVVIHLLSKPN*	AATTGATGGATTTAAAAGTTTTAGAGTATCCAACAGGTAAATATGAAACATCATGTTAGTTGGGCTTGCTCAAAAGGTGAATGACAACTGCTGTGAGCACAACGATAATGACCACAACAAAGACCAGGAAAAGAGCTCGACACACAGGGCGACCCGTCATCCGCAGCACCATTCCATCCACGCCACGGGCCTCGCTGCCCTGCGCAGTTGAGCTGGGAAGACCCACGTTCAGCGTGCGGTTGGTCGGCCCTAGAGACGTCACTGAACTGCGTCCCCTTTCAGGAGCTCTCTTGACCTGCAGCTTCCCTTTGTTTCGGATGAAGCGGATGCTGTAGACCCTCTGCATGGCGGCCGGCAGGTAGGACAGCACGTCTGAGTCCGTGGTCAGCTTTGGGAGGC…
P50616	4.16811	4.29844	0.000428733	sp|P50616|TOB1_HUMAN`P50616`Q:1-343,H:1-345`75.14%ID`E:1e-138`RecName: Full=Protein Tob1; AltName: Full=Transducer of erbB-2 1;`Eukaryota; Metazoa; Chordata; Craniata; Vertebrata; Euteleostomi; Mammalia; Eutheria; Euarchontoglires; Primates; Haplorrhini; Catarrhini; Hominidae; Homo.	GO:0005737^cellular_component^cytoplasm`GO:0005070^molecular_function^SH3/SH2 adaptor activity`GO:0003714^molecular_function^transcription corepressor activity`GO:0030514^biological_process^negative regulation of BMP signaling pathway`GO:0008285^biological_process^negative regulation of cell proliferation`GO:0045668^biological_process^negative regulation of osteoblast differentiation`GO:0007184^b…	MQLEIQVALNFIISYLYNKLPRRRVNIFGEELERQLKQKYEGHWYPDKPYKGSGFRCIHVGEKVDPVVEKAAKESGLEIEDVRNNLPQDLSVWIDPYEVSYQIGEKGPIKVLYVDDSNESGANSGGLDLDKEIKNSFNPEAQVFMPISEPANGASPGSSSPSPPFGHSAAVSPTFMPRSTQPLTFTTATFAATKFGSTKMKSSGRSSNNNNNGGGSSAGNKAARTSPTNLGLNVNSLLKQKAISTSMHSLYGLGLGPQQHPKPSALSPNAKEFVFPPLQGQGSQSALFPGDSSLSLSPLQYSNAFDMFAAYGGLNDKSLMDGLNFSLSNMQYSNQQFQPVMAN*	CCGGTTCTACAGCTCATGAAGGGAAGCACAGCCCAGTTCAGCTGGAGTTTGTTTTATTAAAAAGATCAGGGTGCAAATATCAAATAAAAAAAAATAAAGACAAGCATATCATTTAGAAGCATTTAATACAAACTTAACAATATAAACTATTTCAGTCCCTCTTGACGTTAAGACACTGACTCAAAATACTTTGTTAGACCGTCTCATTTATCAAGTATTGCACAATGTAGGTACAAAATTAATATACGATTACATTTTGTCCATTATATAGCAAAAATCTTTAAACTCTTAACAGAAAATACAACTCTTATGTTTTTTCAAAAAAGCAAATATTCTTAAATCCCACCACTACGGAATATTCTGTACACAATCTTCAGGGTAGTCCATGTTTTTTTTCTT…
A2ARV4	4.11734	4.10655	0.000130971	sp|A2ARV4|LRP2_MOUSE`A2ARV4`Q:5-178,H:4401-4584`27.42%ID`E:7e-08`RecName: Full=Low-density lipoprotein receptor-related protein 2; Short=LRP-2; AltName: Full=Glycoprotein 330; Short=gp330; AltName: Full=Megalin; Flags: Precursor;`Eukaryota; Metazoa; Chordata; Craniata; Vertebrata; Euteleostomi; Mammalia; Eutheria; Euarchontoglires; Glires; Rodentia; Sciurognathi; Muroidea; Muridae; Murinae; Mus; …	GO:0016324^cellular_component^apical plasma membrane`GO:0031526^cellular_component^brush border membrane`GO:0005905^cellular_component^coated pit`GO:0030139^cellular_component^endocytic vesicle`GO:0005783^cellular_component^endoplasmic reticulum`GO:0005768^cellular_component^endosome`GO:0005615^cellular_component^extracellular space`GO:0005794^cellular_component^Golgi apparatus`GO:0016021^cellula…	NKALCKCTPEWQGEFCQTNVFNGVATSVGIAIGVTILVVALLVALVYAARQKSTIVERLRSNLPSMPSMPQMPKFSGFRNGFTGNGLETGGSETVENNEAVPCTSVWTVDPVTKSFENPAYEAGEPHAPNGIMGSSSAPPDTNQENINNPLYGEEAPPVTNSTLNEAKSSQPFQDTSEIQAHSLAFEDATLPTSPASQELKVVEGGKLGSFQNPLYKESEDAPTSDSDV*	AGGTCACATCAAAGAATACTGCATTTTCCTGTACTGCAAAGTGTCTCGGTTTATTTATGTTGTGTGTACCGGTCCAATTAAACGTCTGAATCAGAAGTGGGAGCATCTTCAGATTCCTTGTACAGCGGGTTTTGAAAAGATCCTAACTTTCCACCTTCAACAACTTTTAACTCCTGTGAGGCTGGCGATGTAGGTAGAGTAGCATCTTCAAAGGCTAAACTGTGTGCTTGGATCTCTGAAGTGTCCTGAAAAGGCTGGCTGGATTTTGCTTCATTTAGAGTGGAATTGGTCACAGGTGGAGCCTCTTCGCCATAAAGAGGATTGTTGATGTTCTCCTGGTTTGTGTCTGGAGGAGCTGAGCTGCTTCCCATGATGCCGTTGGGGGCATGCGGTTCTCCT…
Q7ZTS4	4.10103	3.64226	0.0191765	sp|Q7ZTS4|K1C18_DANRE`Q7ZTS4`Q:1-238,H:192-427`62.61%ID`E:7e-79`RecName: Full=Keratin, type I cytoskeletal 18; AltName: Full=Cytokeratin-18; Short=CK-18; AltName: Full=Dorsal aorta proneprin kinesin-1; AltName: Full=DreK18; AltName: Full=Keratin-18; Short=K18;`Eukaryota; Metazoa; Chordata; Craniata; Vertebrata; Euteleostomi; Actinopterygii; Neopterygii; Teleostei; Ostariophysi; Cypriniformes; Cyp…	GO:0005882^cellular_component^intermediate filament`GO:0005198^molecular_function^structural molecule activity	ILDETNVLRLHLEGDIESLKEELIVLKKNHEKDVTELRAQITQAGVFVDVDAPKGQDLAKIMEEMRAKYEKIALKNQQEVKAWHESQMTEVQVQVTENTVALKEATSLMSETRRKHQALDIELQSALNLIEALKASLQDVEMRYSMELERYNAIIMRLQEELTKIRSEIQHSGREYEQLLNIKVKLEAEIAEYRRLLEGGAELKLEDAVDKKKVQTKVVTITQTLVDGKLVSENKDVKSDEKIVMN*	AGATTCTGGATGAAACCAATGTCCTCCGTTTGCACCTGGAGGGTGATATCGAGTCTCTGAAGGAGGAGCTGATTGTCTTGAAGAAGAACCATGAGAAGGACGTCACTGAACTTCGCGCACAGATCACACAGGCCGGCGTTTTCGTGGATGTCGACGCACCTAAAGGTCAGGACCTTGCTAAGATCATGGAGGAAATGAGGGCAAAGTATGAGAAGATAGCACTGAAGAACCAGCAGGAAGTGAAAGCATGGCACGAATCTCAGATGACAGAGGTGCAGGTCCAGGTAACTGAGAACACAGTAGCCCTGAAGGAGGCCACAAGTCTGATGAGTGAAACTAGGAGGAAACATCAAGCCCTTGACATCGAACTTCAATCTGCACTCAATCTGATCGAAGCTC…
Q9JHW4	4.07688	3.71936	0.0268759	sp|Q9JHW4|SELB_MOUSE`Q9JHW4`Q:10-573,H:4-582`63.79%ID`E:0`RecName: Full=Selenocysteine-specific elongation factor; AltName: Full=Elongation factor sec; AltName: Full=Eukaryotic elongation factor, selenocysteine-tRNA-specific; Short=mSelB;`Eukaryota; Metazoa; Chordata; Craniata; Vertebrata; Euteleostomi; Mammalia; Eutheria; Euarchontoglires; Glires; Rodentia; Sciurognathi; Muroidea; Muridae; Murin…	GO:0005739^cellular_component^mitochondrion`GO:0005634^cellular_component^nucleus`GO:0005525^molecular_function^GTP binding`GO:0003924^molecular_function^GTPase activity`GO:0000049^molecular_function^tRNA binding`GO:0006184^biological_process^GTP catabolic process`GO:0001514^biological_process^selenocysteine incorporation	MSESPDSRTRTLNFNVGVLGHVDSGKTSLARALSSTASTAAFDKNPQSRERGITLDLGFSSFTVDCPDHLRDGGGLKPYDSLQFTLVDCPGHASLIRTIIGGAQIIDLMILVVDVVKGMQTQTAECLLIGELTCPSMVVVLNKIDLLPPNKRQNAVEKMTKRMHKTLESTRFKECPVIAVAARPGGPDAAEPEEPHGVQELIELLKKQTYLPKRDPAGDLLMAVDHCFSIRGQGTVMTGTILQGSLAVNDTVEIPVLKVTKKIKSVQMFRKPVSGAMQGDRVGVCVTQFDPKLLERGVVCTPGSLRTLFGAVISVRKIGYFKGSLATRAKLHITVGHETVMARVSFFGLPPSDAQSAPPELRSLEAPFDFDREYVYQDEYVSAQADGAGGGPDPEQWAL…	AAGCTTAAAGATTAGGAGCAAAAACTGAAGGACGCGTCTGGATGAAGATCAAAACGGCTCATTTCATAAATTTATGATGCTGGTCTTGGAGGATTTTGGCGGAGGACTTGGCGTCGTAAAACAACTCGTTGATTTCCTCCACCTGCTCTCTCTCCACCGTTTCTTTGCCTTGAACTCGGCCCAGCAGACTGCCTGGAGTCAGCAGCTGCACGGCGTACCTGAGGGTGGTCTTGGTGCCGATTTCTGCCAGGTGTGTCAGAGCTTCTTCGCTGATGCTGATCCCCTCCGTCTGCGCTCGGATCTTGATGATCTGCTTCATCTCCTGCGGCGTGTACAGCATGGTGCGGATGATCATGACTCTGTCCAGGAGGTCCAGAGGAATCCCATGTGGAGAGCTGA…
Q8CJB9	4.03875	3.22687	0.000410843	sp|Q8CJB9|BRE1B_RAT`Q8CJB9`Q:4-996,H:2-1002`62.35%ID`E:0`RecName: Full=E3 ubiquitin-protein ligase BRE1B; Short=BRE1-B; EC=6.3.2.-; AltName: Full=RING finger protein 40; AltName: Full=Syntaxin-1-interacting RING finger protein; Short=Protein staring;`Eukaryota; Metazoa; Chordata; Craniata; Vertebrata; Euteleostomi; Mammalia; Eutheria; Euarchontoglires; Glires; Rodentia; Sciurognathi; Muroidea; Mu…	GO:0005737^cellular_component^cytoplasm`GO:0033503^cellular_component^HULC complex`GO:0043005^cellular_component^neuron projection`GO:0005634^cellular_component^nucleus`GO:0005886^cellular_component^plasma membrane`GO:0046872^molecular_function^metal ion binding`GO:0032403^molecular_function^protein complex binding`GO:0004842^molecular_function^ubiquitin-protein ligase activity`GO:0008270^molecul…	MSGAGGGKRPSGGDSPPGPPEKKSKKEEKTTTTLIEPIRIAGVSSTEEMDMKVIQFKNKKLCERLEQRQAMEDELREKIEKLEKRQATDDTTLLIVNRYWSQLEESVRLLRKRIEPEQPAPAPPTAPVTDPGAVDDSGLRLSSPRSEGPAPPVPEIQSESEPMDQQQVEERQEKNQEEQQPPLPAGSEELVTPTEPAPESKTDSSPPPPPLSENAKGFLAVLEQSTEEELSLHLQDRMQFSKDAIAQLVCVFDRLHSRIDSMCRAAQAADENHPDIIQNRTFLEENTRLHELSTFLHGRHHKMSMEYNELVDKMTSAETKVSEMETTVEDLQWDIEKLRNREQKLNKHLAEAMEQLKSGYSSSGSSGALVGGQITLNIQKFESLNAELEHNQELANSRM…	AAAAGACGTAAGACCAATCTGGCTCTCCTATATTGGAAACACGTTTTCTTTTTTTAATTTAAGATCCTGCTGAAGAGAACAGTTGAAACACTTTTAGGAGCTTTCAAAGACGTAGCACTGTGTACACAAACATCTGTGTTTATTAGCTAGACTCAATTAGATAAAGCACTATGTTTGGTCAGCAAATGGCAATGATGTGGTAAAAAAAACAACATTAAAACACGGAGAAACACTTTGAATAAATTCAGTTCTTTTTTTGTGTCCTCGAATCGCTCCTTTGGTTCCGTCTATCCTTTAGGTGATGTAAATGCGGTGAAAGTCATTGGCTCCGAAGGCACAGTTGCACTTGGGGCACTTCCTCTGCCGGGTGTCGTAGCGCATCTTCAGACATTCGTAGCA…
Q9TU53	3.99738	2.23189	0.000438694	sp|Q9TU53|CUBN_CANFA`Q9TU53`Q:1-158,H:3455-3612`60.76%ID`E:1e-53`RecName: Full=Cubilin; Flags: Precursor;`Eukaryota; Metazoa; Chordata; Craniata; Vertebrata; Euteleostomi; Mammalia; Eutheria; Laurasiatheria; Carnivora; Caniformia; Canidae; Canis.	GO:0010008^cellular_component^endosome membrane`GO:0005765^cellular_component^lysosomal membrane`GO:0005509^molecular_function^calcium ion binding`GO:0031419^molecular_function^cobalamin binding`GO:0008203^biological_process^cholesterol metabolic process`GO:0015031^biological_process^protein transport	GSTANSPLIGRFCGSTLPNPIFPQSNTLYLHFRSDFSSVRDGFDVTWTSSPYGCGGMLYGDHGSLSSPNYPGTYPNQSHCEWNIMAPRGRVVTVTFGQMSIDDPGDCQNNFLKLYDGPDSSSLPVGPYCGVETNIAPFRASSHQVFIVFQSQYSILPS	ATGGAAGCACAGCTAACTCACCACTTATTGGTCGGTTCTGTGGAAGCACTCTGCCTAATCCCATCTTCCCACAATCCAACACGCTTTACCTCCACTTCAGAAGTGACTTCTCCAGTGTTCGGGATGGGTTTGATGTCACATGGACTTCTTCTCCTTATGGCTGCGGGGGAATGCTGTATGGAGATCATGGCTCTCTCTCAAGTCCTAACTACCCAGGAACATATCCTAATCAGAGTCACTGTGAGTGGAACATCATGGCACCGCGAGGCCGAGTGGTGACTGTCACCTTTGGCCAGATGAGTATTGACGACCCTGGAGACTGTCAGAACAACTTTTTGAAGCTGTACGATGGCCCAGACTCTTCCTCGCTTCCTGTTGGACCCTACTGTGGAGTGGAAA…
O57607	3.91937	3.01138	0.0260934	sp|O57607|K1C18_ONCMY`O57607`Q:7-175,H:24-203`52.17%ID`E:4e-41`RecName: Full=Keratin, type I cytoskeletal 18; AltName: Full=Cytokeratin-18; Short=CK-18; AltName: Full=Keratin-18; Short=K18; AltName: Full=Simple type I keratin;`Eukaryota; Metazoa; Chordata; Craniata; Vertebrata; Euteleostomi; Actinopterygii; Neopterygii; Teleostei; Euteleostei; Protacanthopterygii; Salmoniformes; Salmonidae; Salmo…	GO:0005882^cellular_component^intermediate filament`GO:0005198^molecular_function^structural molecule activity	SDRSLPTETTYAYSVTGGAGGHGTRISSTSMGSWSGRRFSSGGYDYHSANTSGNLAIANEKATMQHLNDRLASYLETVKKLEKENHTLEIKIREAIEKRGPLEGKDYSKYNATIKELRAKILDMCKGNAQLSIAVDNARLAAEDFKVKMEYELSMRQTVEADVIRLRKILDETNV	GACATTGGTTTCATCCAGAATCTTTCTCAGCCTGATAACATCCGCCTCCACTGTCTGTCTCATTGACAGCTCATACTCCATCTTGACTTTGAAGTCCTCTGCAGCCAGACGTGCGTTGTCAACAGCAATGGAGAGCTGGGCGTTGCCCTTGCACATGTCAAGGATCTTGGCTCTCAGCTCCTTGATGGTGGCATTGTACTTGCTGTAGTCCTTCCCCTCCAGCGGGCCTCTCTTCTCAATGGCCTCCCTGATCTTGATCTCCAGAGTGTGGTTTTCCTTCTCAAGTTTCTTCACCGTCTCCAGGTAGGATGCCAGACGGTCGTTCAGGTGTTGCATGGTGGCCTTTTCGTTGGCAATGGCCAGGTTGCCAGAGGTGTTAGCAGAGTGGTAGTCATACCC…
O15013	3.78558	0.169549	0.00675459	sp|O15013|ARHGA_HUMAN`O15013`Q:163-1432,H:112-1369`63.74%ID`E:0`RecName: Full=Rho guanine nucleotide exchange factor 10;`Eukaryota; Metazoa; Chordata; Craniata; Vertebrata; Euteleostomi; Mammalia; Eutheria; Euarchontoglires; Primates; Haplorrhini; Catarrhini; Hominidae; Homo.	GO:0005813^cellular_component^centrosome`GO:0005829^cellular_component^cytosol`GO:0005089^molecular_function^Rho guanyl-nucleotide exchange factor activity`GO:0051298^biological_process^centrosome duplication`GO:0022011^biological_process^myelination in peripheral nervous system`GO:0033126^biological_process^positive regulation of GTP catabolic process`GO:0051496^biological_process^positive regul…	MTLFVGGVAGMDVEDFPPPPPEMLADSVTFPEEDEGEPFDFDDDEVLEPPPASQNGSEDDSTAGPPAPSITPHTAPSPADGRVADSGGSSVGAAEETSAAGGNNEREKDLPPPPSPPPLLDDDLQTHPGTTGLQSEGDMESLNSSTKDLHSPQTTNGTSSQGKVNPYSVIDIAPIPLQNGSSSSTSSATTEPKEQEGEGHNSSPGITPGYSVPVPCGYATPSGVPLITPAYTTPVIIRHLSVDEDVTVLKTCNTSADSVFSEEYPPITEEDALAKWASDPANTAWMDSPDEVIYDDVPRENSDSNTDPDEMIYDDVEFGEEGGCSSSPDNGWSSSEFESYDETSDGEGGPENGLPNAFMRGKPPQRKNHLSQDLTRLKEHYEKKMKELMANTVGTVELQ…	TCTGCTTACATCGAAGAGTGCAAAGTGAAAAGGCGCTGTGAAAAGTGGAATGGTCTCAGTGTAACGAGTTGTATTTCAGTCAGAAAAGTGAACCGACTTCTCTAAAAACGATATTATGGCGGGAAGATGAACTTTTCATCTGTGGAACAGTCATTAAATGACCCTGTTTGTTGGAGGAGTAGCCGGCATGGACGTGGAAGACTTTCCTCCCCCTCCTCCTGAAATGTTGGCTGACAGTGTCACATTTCCAGAGGAAGATGAAGGAGAGCCCTTCGACTTCGATGACGACGAGGTGCTCGAACCACCTCCAGCCTCTCAAAATGGGAGCGAGGACGATAGTACGGCCGGCCCCCCGGCACCTTCCATCACCCCTCACACAGCTCCATCACCAGCCGACGG…
Q9DB00	3.75704	2.18855	0.0369993	sp|Q9DB00|GON4L_MOUSE`Q9DB00`Q:171-373,H:1584-1801`38.36%ID`E:1e-29`RecName: Full=GON-4-like protein; AltName: Full=GON-4 homolog;`Eukaryota; Metazoa; Chordata; Craniata; Vertebrata; Euteleostomi; Mammalia; Eutheria; Euarchontoglires; Glires; Rodentia; Sciurognathi; Muroidea; Muridae; Murinae; Mus; Mus.	GO:0005634^cellular_component^nucleus`GO:0003682^molecular_function^chromatin binding`GO:0003677^molecular_function^DNA binding`GO:0006355^biological_process^regulation of transcription, DNA-dependent	GKPRQSQLAVLRSASITYSFPPGSKYPPRLPANLDFKRMGFVLVQPPPPPPASNSCPPPNTLTSTAVSSPSPPRVLLHRLPLHKTDAFTVSTVTTEKIRGHIQTLAGLRRRLSPSWRGKPSLEARKGSPSFKKKSINILRTNLEGGVKERKMSESSPSSRGSLDSPRPKGAEPEREHEVTVTLSRSGKEEETCGDGETSSDESRSSVVHVQEKLSSEETEDDDDLRESEDVVFAQDYLHRVCEAVQGCPSLAEQLLQVLDEFSAAGAPDVLYGRLSHVLQPWPQLLKDFAGFLNHKQARKCGLLLEQQLFKRSRQFLRRLGRTLGESSSLYQEVVSVLQGCSAPSSEDMDKVASLLRHHADLQIEVREFFQQLHTSSGSTTGAVDSQNNSGGDGTEGDR…	TCTGGCTTTGGATTCTAAATAAAAATGTAAATAAACATTAATTTTAAGCATTTAATGAAGTTGCTCCACTGAACCAAAATCAGGATTTAACATTTCCAGGTGGTGAACTACAATCACTCATGATTGTAAACGCTCAATCTTGCACTGATGCAGTGATTCTGAAGGCTGTAAGACAGCTGTCGATCACACTCTGCTGGAGATGAATCCACCATTAGTGCTTTTAATGACCCTGTAGCTCAAATGCTGCAGCAGACCGATTCAAACGAGGCATTCACTTGGCGGTCGTCTGCGGGGGCTTGTCCGGGATCAGTCAGGAGCTGCTTTGGGTTTGTTGACTGGCTGTCCCTTTGAGGACGCAGTGTAAAATAGCTTCATTAAGTCCTGGAAACGAAGTTGTAC…
O57579	3.71814	3.69316	0.0484026	sp|O57579|AMPN_CHICK`O57579`Q:1-890,H:74-962`59.6%ID`E:0`RecName: Full=Aminopeptidase N; EC=3.4.11.2; AltName: Full=Aminopeptidase Ey; EC=3.4.11.20;`Eukaryota; Metazoa; Chordata; Craniata; Vertebrata; Euteleostomi; Archosauria; Dinosauria; Saurischia; Theropoda; Coelurosauria; Aves; Neognathae; Galliformes; Phasianidae; Phasianinae; Gallus.	GO:0016021^cellular_component^integral to membrane`GO:0005886^cellular_component^plasma membrane`GO:0004177^molecular_function^aminopeptidase activity`GO:0046872^molecular_function^metal ion binding`GO:0008237^molecular_function^metallopeptidase activity`GO:0008270^molecular_function^zinc ion binding`GO:0006508^biological_process^proteolysis	RLPTHLVPENYTVMLWPRLTPDPDTGLYIFTGESTVEFECVEETDLILIHSNKLNYTSLENGQLARLTSKSPQTAPSITQSWLQTVTQYLVLRLNSKLVKGQRYQLYTKFTGELADDLGGFYRSEYFEGTEKKVIATTQMQATDARKSFPCFDEPAMKAYFFITLRHDVDKVALSNGAAVETTTVTVDGVTVQQTVFERTEKMSTYLLAFIVCDYGYVNSTTGGVLIRIFARKPAIDAGQGDYALSITGPILKFFENYYNSSYPLPKSDQIAIPDFNAGAMENWGLITYRETALLYDPEFSSNSNRERIATIIAHELAHMWFGNLVTLRWWNDLWLNEGFASYVEYLGADDAEPTWNVKDLMVLNDVHRVFAVDALASSHPLSSKEEDIQKPEQISELF…	ATGCACAGATACAATTTTCTTGGTAGACGTTTATAAAAGATGCTCATACTGGTTTTAAAAAGTAGATTTCTTCATGTTTACTGTTGTCTGCTAAGGATTACAAGTTTAATGTGATGAGTTCATGGCGCTGGCCTTTTCTTCCTTTCAATACAATTACAGCATATACATTTTAATCAAGAAAAAAAACAAGAAAATAGGTTCCCTATTAAGGTGTATTTGCACCTTCGAACCAGTTCAGAACATTATTCTTGTTCTCCCCGACCCATTTTATGTTTGCTTGGGTCTTTTCAATAGCCTGGTCCACTGCGAGCGTTCCTGAGCCAAAACCAACAGCAGCATTGTCTTCCTTGAACTGCCTCAGCTGCTGAAGTTCAAATTCAGTGGAAAAGCGTTTGGTGA…
A2ARV4	3.7156	1.06384	0.00311106	sp|A2ARV4|LRP2_MOUSE`A2ARV4`Q:1-133,H:4194-4325`54.14%ID`E:1e-41`RecName: Full=Low-density lipoprotein receptor-related protein 2; Short=LRP-2; AltName: Full=Glycoprotein 330; Short=gp330; AltName: Full=Megalin; Flags: Precursor;`Eukaryota; Metazoa; Chordata; Craniata; Vertebrata; Euteleostomi; Mammalia; Eutheria; Euarchontoglires; Glires; Rodentia; Sciurognathi; Muroidea; Muridae; Murinae; Mus; …	GO:0016324^cellular_component^apical plasma membrane`GO:0031526^cellular_component^brush border membrane`GO:0005905^cellular_component^coated pit`GO:0030139^cellular_component^endocytic vesicle`GO:0005783^cellular_component^endoplasmic reticulum`GO:0005768^cellular_component^endosome`GO:0005615^cellular_component^extracellular space`GO:0005794^cellular_component^Golgi apparatus`GO:0016021^cellula…	VNPRLGMLYWADRGDTAKIECSWLDGQERKVLVADGLGWPTGLSIDFTNDDRIYWSDSKENRIESILPSGEQRRTAVYLDVRNPLSVSVFEDHVYWSTQEKGEVFRQDKFGRGTKTKLLTTGPWLSQVSVYQQ	TGTTGCTGGTACACAGACACTTGAGAGAGCCAGGGCCCCGTGGTCAGCAGCTTGGTTTTTGTACCACGGCCAAACTTGTCCTGCCGAAACACCTCGCCTTTCTCCTGAGTGCTCCAGTAGACGTGGTCCTCAAAGACGCTAACACTTAAGGGGTTTCTGACGTCTAAGTAAACAGCAGTTCTACGCTGCTCTCCGGAGGGCAGAATGGACTCTATTCTGTTTTCTTTGGAGTCGGACCAGTAAATTCTGTCATCATTGGTGAAGTCGATCGACAGACCAGTGGGCCAGCCCAACCCGTCGGCCACAAGTACTTTCCTCTCCTGACCATCCAGCCACGAACACTCAATCTTAGCCGTGTCTCCTCGATCTGCCCAATACAACATCCCAAGTCGAGGGTTG…
P16406	3.71309	0.362488	0.00787964	sp|P16406|AMPE_MOUSE`P16406`Q:3-105,H:603-705`50.49%ID`E:1e-24`RecName: Full=Glutamyl aminopeptidase; Short=EAP; EC=3.4.11.7; AltName: Full=Aminopeptidase A; Short=AP-A; AltName: Full=BP-1/6C3 antigen; AltName: CD_antigen=CD249;`Eukaryota; Metazoa; Chordata; Craniata; Vertebrata; Euteleostomi; Mammalia; Eutheria; Euarchontoglires; Glires; Rodentia; Sciurognathi; Muroidea; Muridae; Murinae; Mus; M…	GO:0016324^cellular_component^apical plasma membrane`GO:0005903^cellular_component^brush border`GO:0031410^cellular_component^cytoplasmic vesicle`GO:0009897^cellular_component^external side of plasma membrane`GO:0016021^cellular_component^integral to membrane`GO:0046872^molecular_function^metal ion binding`GO:0070006^molecular_function^metalloaminopeptidase activity`GO:0008270^molecular_function^…	SPSTDGLLKVNNDHIGFYRVNHDDHMWTDISQQLMTDLSEFDAADRASFIDDVFSLARADVVDYGNAFNLTLYLKNESDYIVWSRVSSSIAYLQDMLSFDLSLYAK	AACTTTGCGTAGAGACTGAGGTCGAAGGACAGCATGTCCTGAAGGTAGGCGATAGAGGAGGAAACGCGGCTCCACACAATGTAGTCAGACTCATTTTTCAGGTACAACGTCAGATTAAAGGCATTCCCATAATCAACGACGTCCGCCCTTGCTAGAGAAAAGACATCATCAATGAAGCTTGCACGGTCAGCTGCGTCAAACTCCGAGAGGTCGGTCATCAGCTGCTGGCTGATGTCAGTCCACATGTGGTCGTCGTGGTTGACTCTGTAGAACCCGATGTGGTCGTTGTTCACCTTGAGCAGGCCGTCGGTTGAGGGTGA
Q9UBG0	3.70949	3.29092	0.00129081	sp|Q9UBG0|MRC2_HUMAN`Q9UBG0`Q:1-222,H:247-472`31.76%ID`E:9e-27`RecName: Full=C-type mannose receptor 2; AltName: Full=C-type lectin domain family 13 member E; AltName: Full=Endocytic receptor 180; AltName: Full=Macrophage mannose receptor 2; AltName: Full=Urokinase-type plasminogen activator receptor-associated protein; Short=UPAR-associated protein; Short=Urokinase receptor-associated protein; A…	GO:0016021^cellular_component^integral to membrane`GO:0030246^molecular_function^carbohydrate binding`GO:0006897^biological_process^endocytosis	NCYKLVEELAIWSDAQDACKKEGGNLASIDMSYDQAFVAGVVLQGKADAWIGLRRMVDGSYSWSDGWPVFFTEWGPGEPTNHRQEGCVSMHASKWFHGTWNDTKCDQAKPYICKISSEKPPPTPSPGDGKCLPFWVPYGRYCYFVYNEKQGYSWPDSRHFCQSANTELVSIHSRAELEFIRNLNYTKNHHIWIGLTRDRNFGWGWTDSTPLGYVNWAPGEPNAA	AAAACTGCTACAAGCTGGTGGAGGAGCTGGCGATCTGGAGCGACGCTCAGGACGCCTGCAAGAAGGAGGGCGGCAACCTGGCCAGCATCGACATGAGCTACGACCAGGCCTTTGTCGCGGGCGTGGTCCTGCAGGGAAAAGCAGACGCCTGGATCGGGCTCCGGCGCATGGTGGACGGATCGTACTCGTGGTCAGATGGATGGCCTGTTTTCTTCACCGAGTGGGGACCAGGAGAGCCGACCAATCACAGGCAGGAGGGCTGTGTGAGCATGCACGCTTCCAAGTGGTTCCACGGGACGTGGAACGACACCAAATGTGACCAAGCAAAGCCCTACATCTGCAAGATCTCCTCAGAGAAACCTCCTCCCACTCCCAGCCCCGGCGACGGCAAATGTCTGC…
P31430	3.66659	2.8023	0.0487128	sp|P31430|DPEP1_RAT`P31430`Q:11-214,H:6-211`63.11%ID`E:9e-75`RecName: Full=Dipeptidase 1; EC=3.4.13.19; AltName: Full=Microsomal dipeptidase; AltName: Full=Renal dipeptidase; Flags: Precursor;`Eukaryota; Metazoa; Chordata; Craniata; Vertebrata; Euteleostomi; Mammalia; Eutheria; Euarchontoglires; Glires; Rodentia; Sciurognathi; Muroidea; Muridae; Murinae; Rattus.	GO:0031225^cellular_component^anchored to membrane`GO:0045177^cellular_component^apical part of cell`GO:0016324^cellular_component^apical plasma membrane`GO:0005615^cellular_component^extracellular space`GO:0031528^cellular_component^microvillus membrane`GO:0005886^cellular_component^plasma membrane`GO:0043027^molecular_function^cysteine-type endopeptidase inhibitor activity involved in apoptotic…	MLKQVIVASLWICSFDLGLTQDPHLNRAYQLMSETPLIDGHNDLPWQLRKLFNNQLNKVDLNKLETTHTNIPKIKQGRLGAQFWAAYVPCETQYKDAVRQTLEQIDVVHRMCEKYPDTFKFVTTSQGILDAFEENKTASLIGVEGGHSIDSSLGTLRTMYHLGVRYLTLTHSCNTPWADNWRVDAGSDPVQSNGLSPFGKQLIVEMNRLGMLID	GAGTGGGAGAAGGAGGGATCCAGCTGAGAAGATCTGAACTAGACGGGGAACAGCAGAAGTTCTGTCCAGTCTGTGGAACTCTCTATTAAGTTGAAGAGAAAAAAATAAAAAAATGTTGAAGCAGGTTATTGTAGCGTCACTGTGGATCTGTTCTTTTGACCTCGGCTTGACTCAGGACCCCCACTTGAACAGGGCTTACCAGCTGATGTCTGAGACCCCACTCATCGACGGCCATAATGATCTGCCTTGGCAGCTTCGAAAGCTGTTCAACAATCAGCTCAACAAAGTTGATCTTAACAAACTGGAAACAACGCACACCAACATTCCTAAGATAAAGCAGGGGCGGCTCGGTGCACAGTTCTGGGCGGCCTACGTTCCCTGTGAAACTCAGTACAAAGA…
Q9CWU0	3.66104	2.20314	0.039259	sp|Q9CWU0|TDR12_MOUSE`Q9CWU0`Q:10-399,H:852-1175`33.33%ID`E:2e-50`RecName: Full=Tudor domain-containing protein 12; AltName: Full=ES cell-associated transcript 8 protein;`Eukaryota; Metazoa; Chordata; Craniata; Vertebrata; Euteleostomi; Mammalia; Eutheria; Euarchontoglires; Glires; Rodentia; Sciurognathi; Muroidea; Muridae; Murinae; Mus; Mus.	GO:0005524^molecular_function^ATP binding`GO:0008026^molecular_function^ATP-dependent helicase activity`GO:0003676^molecular_function^nucleic acid binding	MKWSLAWLLTMLTRNQKPEIFRKEGCMLFFCVYVRFIDVGREKEVKSYQILKLPEHFHSLPEQAVEITVCGVKPADAEIDWHPKVIRTISQKIRGLQHRATAVLSLGNTIFVDPMVRVTQVPGMKTLINEYNVQLEILNTGMGFRNPDHLDLLKALCQDEKACSHKEDVHPSGFWDMLSCVNVRTTAENGESSEPRKSVESTNKSLVQIPPPPEVPLVSACGDKSPFDSRTVGLERSSVSAEQMKKFFSASISNGRENGRAGNPSLCKNDVFKGADRKSTGQIPNSGLTDCRNSAKSFHPQVCWYQTSQCVIVTVRLMNPENQFCDFFPDRVTYSGTVNGRIFRTCLDLQHRIAVDRCSWEMKSNQPVLKLVKQQQGHWDRLVRVKNIFVTFDTEHLDD…	GTTTGTTATTTGGTTCCATCTTTATTATTGTCTTAATTTGGGGGGTAACACATATCAAACTAATGAAAATTGTGTTTATTTTATTCATTAAAAGTAATGTCAAAGATAACTTATGTTTTTTATTTGAAATACAAACAATTAGGAGAAGAACCGATGCAAATAATAAATCTAAATTATTGTGAGCATTGAATTATAATTCTGTGGTGCATGGAAGCAGTGACGCTTCAGAACAGCTGGTGATGTAATGAAATGCAATGTGAAACAGTCATGACCTGGCTGGTCTGATCAGAGCCCAGAATGATGTTTCCAAACACAAGTCCTACTGAAACGTTCTGGAACATGAGATCAATCTGGCCTCAATGACAAACTCAGTGAAACCAAAACCAGCCTGTTTTAATT…
Q5YJC1	3.63042	2.8085	0.0154353	sp|Q5YJC1|SYPH_SPECI`Q5YJC1`Q:1-243,H:1-240`46.99%ID`E:2e-57`RecName: Full=Synaptophysin;`Eukaryota; Metazoa; Chordata; Craniata; Vertebrata; Euteleostomi; Mammalia; Eutheria; Euarchontoglires; Glires; Rodentia; Sciurognathi; Sciuridae; Xerinae; Marmotini; Spermophilus.	GO:0030054^cellular_component^cell junction`GO:0016021^cellular_component^integral to membrane`GO:0043005^cellular_component^neuron projection`GO:0030672^cellular_component^synaptic vesicle membrane`GO:0005215^molecular_function^transporter activity	MESVAQKVMASRFNLDFGPLKEPLAFIRLLEWLFSIFAFATTGGYSGSTFFNIQCSGRAFPEIEGTFSYPFRLMKHTYEVPDCKVNQTTTVVEHLTGNYSSSAEFFVAVGVLAFLYCTATLVIYLGYQHLYRESSHGPTVDLLVTGAFAFLWLTSSSAWAKGLTDVKRATSPAFIITLLDVCLNKANTCTPGAFPLMGRLNASVVFGFLNLILWGGNCWFIYKETPFHKTTSPPPVVEEGVVPS*	GAACTGTTAAACTTTTATTTTCATCAAACAACACTGAATGTTCACACAGATTTGGATGTAACAGGAACTTCACTCTCTGCATCAATACAGTAGTAAGTAAACGGTACATCATGCAAGGCCATACATAAAAGAACAAGTTGTGTAACAGCAAAAATAGAAATGTTGTGAAACAAGTTTCAATTCCTATGAATTTTTTTTTCTGGGTAACAACAGAAGCAACATTTAAAAACTGCTGTACTGAAGCAACTCAACGCTTGTCCCACATGTACCACAAAGTGCTGCACTTATTATTTTATCATTCGTTCCTTAAGGTAAATTTTAATAGTAACTTTCAGTTAAGCAACTGTGAATATGGAGCCATTTCCCCCACAAAAAAGTATATGGGTTTATTTATTATCT…
Q28689	3.63006	2.37711	0.0435434	sp|Q28689|MRP2_RABIT`Q28689`Q:6-705,H:2-674`50.99%ID`E:0`RecName: Full=Canalicular multispecific organic anion transporter 1; AltName: Full=ATP-binding cassette sub-family C member 2; AltName: Full=Canalicular multidrug resistance protein; AltName: Full=Epithelial basolateral chloride conductance regulator; AltName: Full=Multidrug resistance-associated protein 2;`Eukaryota; Metazoa; Chordata; Cra…	GO:0016324^cellular_component^apical plasma membrane`GO:0016021^cellular_component^integral to membrane`GO:0005524^molecular_function^ATP binding`GO:0042626^molecular_function^ATPase activity, coupled to transmembrane movement of substances`GO:0006200^biological_process^ATP catabolic process	MCAAALEEYCGSVFWNASFLDREDPDLPICVEQTVLVWIPLGFLWLFAPPHLMSLCRRTRVNTKHWTKLYLCKQFVVALLLLTAIAGLAVTLGEDFGPNSSTVKNAAVYYTNPVLFAVTWILVLLCQEGVRRKEGAVDSASLFIFWLLLVLCDVFPFQTLIRDALKVGEVSDVPRFCLFHISFGLELIALVLSAFADIPPEAREQAKKNPELGASFLSRITFNWFNSMVVTGYKRPLVQEDMWELNEKDSTSYLSSRFQHHMDSDLAAARVRYQNKLKKKPLKNKGRAQAEASENGISNGLGKGVSQDALMMEDKGKSTEKKKKKKEKKEEEDYPNSWLLSTMYKTFKWLLIESAFFKLLQDLLAFVSPQLLKLMISFTQDPDSYVWEGYVYAVLLLLV…	TTCCCTGAGCCGACTGCTCCCACTACTGCTACAAGACGGCCAGGTTTAATCTCTAGAGAGACATCTTTCAGGAGAGGCTCTGCGTCTCTTTCCCAAGAGAAGGAACCGTTTCGCACGCTGACAGCCGAGTCAAAGCTGGGGTCGTGTCGCACAATGTCAGCTTCAAGATCTTCACCTCCAAGAAACTTCTCCAGTCTCTTTTTAGACACTCCTGTTTGCACAATAGAAGCAATTAGCATGGGCAGCATGGCCAGAGGAAACCGAAGAATATTAAAGAGCGAGATGGAAGTGAACGCTTTCTCAGCCGTTAAAATATTGTCAGGGCTTACGAGAACATATACTGAAAAGGAAGCCAAAGAAACCAGAGCAGGAGCACAACTGAAGATGAAAATAGAAACT…
Q08DB5	3.62382	0.720784	0.00380027	sp|Q08DB5|STX5_BOVIN`Q08DB5`Q:41-154,H:225-338`76.32%ID`E:2e-43`RecName: Full=Syntaxin-5;`Eukaryota; Metazoa; Chordata; Craniata; Vertebrata; Euteleostomi; Mammalia; Eutheria; Laurasiatheria; Cetartiodactyla; Ruminantia; Pecora; Bovidae; Bovinae; Bos.	GO:0033116^cellular_component^endoplasmic reticulum-Golgi intermediate compartment membrane`GO:0000139^cellular_component^Golgi membrane`GO:0016021^cellular_component^integral to membrane`GO:0005634^cellular_component^nucleus`GO:0006886^biological_process^intracellular protein transport`GO:0042147^biological_process^retrograde transport, endosome to Golgi	MYLVLCNVRIKNILGSRKKGAQEPHADREPRYDYQGYTTTNLKESSVLMQDESRSLGDVAINMESQSNPLQLQLIDEQDSYIQSRADTMQNIESTIVELGSIFQQLAHMVKEQEETIQRIDANVEDTQLNVEAAHTEILKYFQSVSSNRWLMIKIFLVLVVFFIIFVVFFA*	TATAAACCAATAAATGATAAATATACCTAAAGAAAAATTCACATTGAGCATGTTGCTACATTTGTTCTCAAAGATAGTAGTAGAAGTAGTTTTTTCATTTTACTGCAAGTATAACAACTGCTGCTGCTGTCTTAGAGAACTGCTCAGACTCTTTGTGAATGATTATTCATGTATTTGGTCCTCTGTAATGTAAGAATTAAAAATATTTTAGGGAGCCGCAAAAAAGGGGCCCAGGAGCCGCACGCAGATCGTGAACCGCGCTATGACTACCAGGGCTATACAACCACAAATTTAAAAGAGAGTTCGGTCCTGATGCAGGATGAGTCGCGCAGTTTGGGAGACGTGGCCATAAATATGGAGTCTCAGAGCAACCCTCTGCAGCTCCAGCTCATTGATGAA…
Q08CH3	3.61446	2.941	0.0136596	sp|Q08CH3|MPND_DANRE`Q08CH3`Q:57-506,H:1-454`86.78%ID`E:0`RecName: Full=MPN domain-containing protein; EC=3.4.-.-;`Eukaryota; Metazoa; Chordata; Craniata; Vertebrata; Euteleostomi; Actinopterygii; Neopterygii; Teleostei; Ostariophysi; Cypriniformes; Cyprinidae; Danio.	GO:0008233^molecular_function^peptidase activity`GO:0006508^biological_process^proteolysis	TTRKLVRGAAAPPSLLPPSVSPPRAAGAAGARAPTAAPRAGKEWPRAELDPNAFREMGSEPPGSPQAVEDGGEEDEEELSGGEEGDLRSSSGRGSLLTRRGITLRVLLKDGLVEPGDGVLGIHYLGKNFVGDLLNDGKIRWVETGQIFNSPSAWATHCKRLVNPAKKSGCGWASVRYRGQKLVQYKTTWLHKYQPSADMSLVSEEDDDEDEEEGKTAVPADEKNKNIKPGLHDVVVSRRTDRERIPVRYCTLGTRDAAKDPHTLVELSAFSAINRFQPFNVAVSSNVLLLMDFHCHLTTSEVVGYLGGRWDTNTQLLTVLRAFPCRTRLGDRDAASAVEEEICQNLFMRGLSLVGWYHSHPRGPALPSLQDIDSQMDHQLRLQGSNNGFQPCLGIICGP…	GTTGTGTTTGATTTTCTTTATTTCCAAGTAAATCACATCATTAAAGCATTATTAAACTCTGTTAACTGAAATAAGTAACAATATTTTACACTGTGGGTTTTTTCTACAATGAACCCCACATATAGGCTACGCGTGCACTTTATTATTCAGTAAATTAAATTAATTTCCCTATTTTAGAATCAGCCTTGTCCTACTCACAAAAACAACCTTCAATTCACCACAGAAGTGAATACATAAATCTATTCCTTCAGTACTGAAACACAATGAAAACTTTTTTTTTTTCATTTTTCACCAAAGAACAAACAAACAAACAGATGCTTTAATGCAACAACAAACAAATGACAGTTTAAATAGTTCCAGTGTGTCTTTGAACGCCTCGTGGATCATCAGCAGGCGGGA…
Q9CU65	3.59902	0.788851	0.000927179	sp|Q9CU65|ZMYM2_MOUSE`Q9CU65`Q:31-264,H:1146-1376`44.3%ID`E:4e-52`RecName: Full=Zinc finger MYM-type protein 2; AltName: Full=Zinc finger protein 198;`Eukaryota; Metazoa; Chordata; Craniata; Vertebrata; Euteleostomi; Mammalia; Eutheria; Euarchontoglires; Glires; Rodentia; Sciurognathi; Muroidea; Muridae; Murinae; Mus; Mus.	GO:0016605^cellular_component^PML body`GO:0046872^molecular_function^metal ion binding`GO:0008270^molecular_function^zinc ion binding`GO:0006355^biological_process^regulation of transcription, DNA-dependent`GO:0006351^biological_process^transcription, DNA-dependent	AAALLFTSRVSASAAWLQRGRVWSKFLVVPLQLFQHLYAKGRRLDLFSDPSFQQFGEELNKVLKDWQPSVLPDGSLWGRVEEQSLWSSQHLGEQSPAALLRSLVYLNTKYFGLRTVEQHLRLSFANVYSPDTVHPVTKENTVCIRVPSISQDHNVETESGKRKRSLQDGEQEDEDSGGSSVRCPVKKHECRLYEIYRSKCPPSLWEHHGVFYMQPDAACGPETPLWFSSAPLERRILESLLTRVLLARDIYTDKEHLEEEEQGDQGEEVGAE*	AGCTGCTGCACTCCTTTTCACATCACGTGTGAGCGCGAGCGCAGCATGGCTGCAGAGAGGACGGGTTTGGTCGAAGTTTTTAGTCGTTCCGCTACAATTATTTCAGCACCTTTACGCCAAAGGACGCAGACTCGACCTGTTCAGTGATCCAAGCTTCCAGCAGTTCGGAGAGGAGCTGAACAAAGTCCTGAAAGACTGGCAGCCCAGCGTGCTTCCTGATGGCTCACTATGGGGTCGAGTGGAGGAGCAAAGTCTGTGGAGCAGTCAGCATCTGGGGGAGCAGAGTCCCGCCGCCCTGTTGCGCTCCCTGGTTTACCTGAACACCAAATACTTCGGCTTGCGCACGGTGGAACAGCATCTACGCCTCTCCTTCGCCAACGTCTACAGCCCTGACACGGT…
P46098	3.50548	0.30591	0.000347269	sp|P46098|5HT3A_HUMAN`P46098`Q:88-212,H:50-174`36%ID`E:7e-20`RecName: Full=5-hydroxytryptamine receptor 3A; Short=5-HT3-A; Short=5-HT3A; AltName: Full=5-hydroxytryptamine receptor 3; Short=5-HT-3; Short=5-HT3R; AltName: Full=Serotonin receptor 3A; AltName: Full=Serotonin-gated ion channel receptor; Flags: Precursor;`Eukaryota; Metazoa; Chordata; Craniata; Vertebrata; Euteleostomi; Mammalia; Euthe…	GO:0030054^cellular_component^cell junction`GO:0005887^cellular_component^integral to plasma membrane`GO:0045211^cellular_component^postsynaptic membrane`GO:0051378^molecular_function^serotonin binding`GO:0004993^molecular_function^serotonin receptor activity`GO:0005232^molecular_function^serotonin-activated cation-selective channel activity`GO:0007586^biological_process^digestion`GO:0007268^biol…	QDSNIVSSWTTDFSSGDSGMFEPDYPELGMAPLPPEAIDPIQIRPEYFHRIHETAQDVKVDASYECSYQSVLNMLHFKGNNDKYITSRPVLDYRHLTWIFIEMRIYAILDVREADQMFVSYIWVYLRWDNEHIHWDPDQFCGQDHILIPTKNLWMPDLTIEEMTEQDKASPSPNLNIGYHGWVEFRNDQVVVSTCKMEVYRFPFDIQSCKIS	GGAGATTTTGCAGCTCTGAATGTCAAATGGAAACCTGTAAACTTCCATCTTGCAGGTGCTGACCACCACTTGGTCGTTCCTGAATTCAACCCAGCCATGGTATCCGATGTTGAGATTAGGACTCGGTGAAGCTTTATCCTGCTCTGTCATCTCTTCAATTGTTAGATCTGGCATCCACAGATTTTTTGTGGGAATTAAAATATGATCTTGTCCACAAAACTGATCAGGATCCCAGTGAATGTGCTCGTTGTCCCACCTCAAATAAACCCAGATGTAAGAAACGAACATCTGGTCAGCTTCTCTCACATCCAGAATGGCGTAAATCCTCATTTCAATAAAAATCCACGTCAAATGCCGATAGTCCAAGACCGGACGGCTCGTAATGTACTTGTCATTGTT…
Q8VHR5	3.49575	0.376989	0.0301903	sp|Q8VHR5|P66B_MOUSE`Q8VHR5`Q:4-136,H:342-474`89.47%ID`E:4e-59`RecName: Full=Transcriptional repressor p66-beta; AltName: Full=GATA zinc finger domain-containing protein 2B; AltName: Full=p66/p68;`Eukaryota; Metazoa; Chordata; Craniata; Vertebrata; Euteleostomi; Mammalia; Eutheria; Euarchontoglires; Glires; Rodentia; Sciurognathi; Muroidea; Muridae; Murinae; Mus; Mus.	GO:0005634^cellular_component^nucleus`GO:0046872^molecular_function^metal ion binding`GO:0043565^molecular_function^sequence-specific DNA binding`GO:0003700^molecular_function^sequence-specific DNA binding transcription factor activity`GO:0008270^molecular_function^zinc ion binding`GO:0006351^biological_process^transcription, DNA-dependent	GVGSMADQASSQAAAKLALRKQLEKTLLEIPPPKPPAPLLHFLPSAANSEFIYMVGLEEVVQSVLDSQGKLRGALARMEPFFCAQCRTDFTPHWKQEKSGRILCEQCMTSNQKKALKAEHTNRLKNAFVKALQQEQVRAGSGFSQTFSILDPKARNAKCGCVFMSGNRTETSAANGSFSEHRVRWF*	AAAAAAAAAAAAAAAAAAAGCTGCTGATGAAGAGCTGTGGGACACGTGGCGTCCTCTGAACACACCATTGTTCCGGTCAGCGTCCTCCACCTCAACAGCTAGTGTCAAACTTTTTAAAACCGCAGAGGTCTTAAACGTCATGTTGCATAGCAACCAGAGTGCACCCTGTTAATTTTTTTTTAAGTGTGTGTGTGTGTGCGTGTGGGTAGCATTAGTCTAAATTTGGAGCTGAGAAAAAAGTAAAAGATCGACACAGCGAAGTCAGACGCAGAGAGGTGAAGCCAACACAGGAAAGAAATGGGTCACGCCGACTGGAGCAAACATGGCCGCCGCAGGGTTCGGGGAGGGGAGGGGAGGGGGGAGTGCCACCACCAGTGACAACCGAAGAAAAGTACATAA…
P20693	3.48394	1.89086	0.00809841	sp|P20693|FCER2_MOUSE`P20693`Q:8-129,H:207-322`39.02%ID`E:5e-15`RecName: Full=Low affinity immunoglobulin epsilon Fc receptor; AltName: Full=Fc-epsilon-RII; AltName: Full=Lymphocyte IgE receptor; AltName: CD_antigen=CD23;`Eukaryota; Metazoa; Chordata; Craniata; Vertebrata; Euteleostomi; Mammalia; Eutheria; Euarchontoglires; Glires; Rodentia; Sciurognathi; Muroidea; Muridae; Murinae; Mus; Mus.	GO:0009897^cellular_component^external side of plasma membrane`GO:0016021^cellular_component^integral to membrane`GO:0030246^molecular_function^carbohydrate binding`GO:0046872^molecular_function^metal ion binding`GO:0002925^biological_process^positive regulation of humoral immune response mediated by circulating immunoglobulin`GO:0051712^biological_process^positive regulation of killing of cells …	KNEIQGNWSFARSWCREQGGELAIIDSQYENDFVASYLKDLEHAAWIGLSDLLAENQYAWSDGVSPVLYTNWDTNEPNNVGGTEHCVSLSHSMVSSGKWNDDACHKNHSFVCYMKKSSSVQPPPPTKSPCPDGYISWYQNCYKL	AGAAAAACGAGATTCAAGGGAACTGGTCTTTTGCTCGGAGCTGGTGCAGAGAACAAGGAGGAGAGTTGGCCATCATCGATAGTCAATATGAAAATGACTTTGTAGCCAGTTATCTCAAAGATCTAGAGCACGCCGCCTGGATCGGTCTGTCTGATCTGCTGGCGGAGAACCAGTATGCCTGGAGCGACGGGGTCAGCCCGGTGCTGTACACAAACTGGGATACCAACGAGCCCAACAACGTGGGAGGAACGGAACATTGTGTGTCACTGAGTCACAGCATGGTGTCAAGCGGCAAATGGAACGACGACGCCTGTCATAAAAACCACAGCTTTGTCTGCTACATGAAGAAATCGAGCAGCGTCCAGCCGCCTCCTCCGACGAAGAGCCCGTGCCCAGACG…
P13731	3.46921	0.823299	0.00125104	sp|P13731|SERPH_CHICK`P13731`Q:1-405,H:1-405`71.36%ID`E:1e-176`RecName: Full=Serpin H1; AltName: Full=47 kDa heat shock protein; AltName: Full=Collagen-binding protein; Short=Colligin; Flags: Precursor;`Eukaryota; Metazoa; Chordata; Craniata; Vertebrata; Euteleostomi; Archosauria; Dinosauria; Saurischia; Theropoda; Coelurosauria; Aves; Neognathae; Galliformes; Phasianidae; Phasianinae; Gallus.	GO:0005737^cellular_component^cytoplasm`GO:0005788^cellular_component^endoplasmic reticulum lumen`GO:0005793^cellular_component^endoplasmic reticulum-Golgi intermediate compartment`GO:0004867^molecular_function^serine-type endopeptidase inhibitor activity`GO:0030199^biological_process^collagen fibril organization`GO:0051604^biological_process^protein maturation`GO:0030162^biological_process^regul…	MWMTSIVALFLLALGASAEDKKLSVHATTLADNSANLAFSLYHSMAKDKSTENIAISPVVVASSLGMVALGGKASTASQVKTVLSADKLKDEHLHSGLSELLSEVSDTKTRNTTWKINNRLYGPSTVSFADDFVKNSKKHYNYDHSKINLRDKRSAVNSINEWAAKSTGGKLPEVTKEVQNPDGAMIVNAMFFKPHWEERFHEKMVDTRGFLVTRSFTVGVSMMHRTGLYDFYEDTENKLFVLNMPLGQKQASMILIMPYHLEPLDRLEKLLTKKQVDTWLSKMENRAVAISLPKVSVEVSHNLQKYLAELGLTEAVDKSKADLSNISGKKDLYLSNVFHASALELDVDGNPYDTSIFGTDKLRNPKLFYVDHPFIFLVKDNKTNSILYIGRVVRPKGE…	ACAGCCATGGTATATTTTTTCTCACTTTTATTGAAAAAGAAAGATGAACGTGTTCTTACATTATCACATAAGTCCAACGGGTGCAACAAAATGACAGAGCATGAGTGAAATGTGAGAATCAATTAAGGAGCACCTTTCCACTGCAAGTTCAAGCTGACAGAACATGCAATGAACAATAGTTGGAAGGAGCTGTAAAACAAGCTTGTGCAAAGATCTCTTCTTTAAACATTAAAGATAATGCAAGAAAACGCACATGTATTGGTTTGAAGCCACAGTGACAAAAAGAGGATGTTCAAACATAGACATACTTAATATAAGTATGTCTTTATGCCAACTGCTGTTCATGAAAAGTCTCAAGAGATTCATTTTATAAAAAAAAAAAAATTAAATTAAGTTGTC…
Q95334	3.46257	0.847443	0.0259473	sp|Q95334|AMPE_PIG`Q95334`Q:4-114,H:732-841`58.56%ID`E:6e-32`RecName: Full=Glutamyl aminopeptidase; Short=EAP; EC=3.4.11.7; AltName: Full=Aminopeptidase A; Short=AP-A; AltName: CD_antigen=CD249;`Eukaryota; Metazoa; Chordata; Craniata; Vertebrata; Euteleostomi; Mammalia; Eutheria; Laurasiatheria; Cetartiodactyla; Suina; Suidae; Sus.	GO:0016021^cellular_component^integral to membrane`GO:0046872^molecular_function^metal ion binding`GO:0070006^molecular_function^metalloaminopeptidase activity`GO:0008270^molecular_function^zinc ion binding`GO:0016477^biological_process^cell migration`GO:0008283^biological_process^cell proliferation`GO:0006508^biological_process^proteolysis`GO:0003081^biological_process^regulation of systemic art…	QTERLLRETVLSIACKMGDQDALNEASNLFNQWIDGTLSSVAVNLRLLVYQYGMKNAGTPEKWDKMFQKYKDTTLAQEKDKLLYGLASVENVDLLYQLLEATKDEAVVRSQDLF	GAACAGATCCTGACTCCTCACCACGGCCTCGTCCTTCGTCGCCTCCAGGAGCTGATAGAGAAGGTCCACGTTCTCCACTGATGCCAGACCGTACAGCAGCTTGTCCTTCTCCTGAGCCAGCGTCGTGTCTTTGTACTTCTGGAACATTTTGTCCCATTTCTCCGGAGTGCCGGCGTTCTTCATGCCGTACTGATAAACCAGCAGCCGCAGGTTCACCGCCACGCTGCTCAGAGTCCCATCAATCCACTGGTTAAAAAGGTTCGAGGCTTCATTCAGAGCATCCTGATCTCCCATCTTACACGCGATGCTGAGCACCGTCTCCCTCAGCAGCCTCTCCGTCTGCG
O60494	3.46243	0.839847	0.00129452	sp|O60494|CUBN_HUMAN`O60494`Q:1-92,H:3200-3294`53.68%ID`E:4e-23`RecName: Full=Cubilin; AltName: Full=460 kDa receptor; AltName: Full=Intestinal intrinsic factor receptor; AltName: Full=Intrinsic factor-cobalamin receptor; AltName: Full=Intrinsic factor-vitamin B12 receptor; Flags: Precursor;`Eukaryota; Metazoa; Chordata; Craniata; Vertebrata; Euteleostomi; Mammalia; Eutheria; Euarchontoglires; Pr…	GO:0016324^cellular_component^apical plasma membrane`GO:0031526^cellular_component^brush border membrane`GO:0005905^cellular_component^coated pit`GO:0005829^cellular_component^cytosol`GO:0030666^cellular_component^endocytic vesicle membrane`GO:0005783^cellular_component^endoplasmic reticulum`GO:0010008^cellular_component^endosome membrane`GO:0031232^cellular_component^extrinsic to external side o…	TFSSFELESSVTCRYDYVKVYDGHSMDFPLVGTFCGTSIPAYFLSTGNFLTIQFVTDSSVQMQGFNATYRAVPLFCGGTLNATTTIQTLTSPFYPNTYPPHT	AGGTATGTGGAGGATATGTATTTGGGTAGAAGGGTGAAGTCAGGGTCTGGATGGTGGTGGTGGCATTCAGGGTCCCGCCACAAAACAATGGAACTGCTCTGTAGGTGGCGTTGAAGCCTTGCATCTGTACGGAGCTGTCAGTGACAAATTGAATTGTCAAGAAGTTTCCAGTGGATAGGAAGTAAGCAGGGATGGAAGTTCCACAAAATGTCCCAACCAGAGGGAAGTCCATGCTGTGGCCATCATAAACTTTGACGTAGTCGTAGCGGCACGTAACGGAACTCTCCAGCTCAAATGACGAGAAAGT
P02751	3.42828	3.94233	0.0170249	sp|P02751|FINC_HUMAN`P02751`Q:4-2351,H:6-2386`53.57%ID`E:0`RecName: Full=Fibronectin; Short=FN; AltName: Full=Cold-insoluble globulin; Short=CIG; Contains: RecName: Full=Anastellin; Contains: RecName: Full=Ugl-Y1; Contains: RecName: Full=Ugl-Y2; Contains: RecName: Full=Ugl-Y3; Flags: Precursor;`Eukaryota; Metazoa; Chordata; Craniata; Vertebrata; Euteleostomi; Mammalia; Eutheria; Euarchontoglires;…	GO:0016324^cellular_component^apical plasma membrane`GO:0005604^cellular_component^basement membrane`GO:0005793^cellular_component^endoplasmic reticulum-Golgi intermediate compartment`GO:0005577^cellular_component^fibrinogen complex`GO:0031093^cellular_component^platelet alpha granule lumen`GO:0005578^cellular_component^proteinaceous extracellular matrix`GO:0005518^molecular_function^collagen bin…	MTGGPLTGLLVALCLSSAAHGAPNKNKRQSQYQVYPDLYEPEAVSPVVCQDNGRSYSPNQQWEKSYHGSTLLCSCSAAGRVDCTTKPEVEETCHDKYNGQTYRIGETYERPREGMIWDCTCIGSGRGKISCTIANRCHDGGRSYKIGDTWKRPHDTADYMLECVCLGNGKGEWTCKPVAQSCFDNNAASSYVVGETWEKRYQGWMMLDCTCLGEGHGKIQCTSRNRCNDNDVKKSFRIGETWMKTDSSGHRVQCLCLGNGRGEWKCDRDSVAQSHGTVVYTPERSRVEFNREGTCRTDSGNSYHEGQRWLRTQGSKQMLCTCLGSGASCQEWEARNQVYGGNSNGQPCVFPFVFMGKTYYSCTSEGRTDGQLWCSTTSNYERDQQYSFCTEKNAIVATL…	TGGCTGCAAAAATATAAAAAGTTTATTAAAAAGATTCAGTCCACAGTAGTTCAGTTTTGGCTGCAAAAATATAAAAAGTTGATCAAAAAACAAAGTGTACACCCCCACATTAGCACTGAGCAAACACGTCTGAGTAAAAAGGGATAAATAAACGAAATGAAAACATTCAAACACAATCAAACACAGATCACATGGAAACAGTTTCCTTGTTGGTGGGTCAGTCTGCTTCACCTTCAGAGGTCTCAGCAGTTTATGAACCTCAATGGTTTATTTCAGAATCCGATGGGTAAAGAGGGCCGTTCATACAATCTCAAACGTTGGCAGTGCTTTTCCTTTAGAGGATGAAAGTGTGATTTCAGATCAACGACCTGCAGCTGCTGAGCTCGGGGACCAGAAAAA…
Q803C9	3.41692	3.56827	0.00112992	sp|Q803C9|PTSS1_DANRE`Q803C9`Q:32-486,H:12-465`76.81%ID`E:0`RecName: Full=Phosphatidylserine synthase 1; Short=PSS-1; Short=PtdSer synthase 1; EC=2.7.8.29; AltName: Full=Serine-exchange enzyme I;`Eukaryota; Metazoa; Chordata; Craniata; Vertebrata; Euteleostomi; Actinopterygii; Neopterygii; Teleostei; Ostariophysi; Cypriniformes; Cyprinidae; Danio.	GO:0005789^cellular_component^endoplasmic reticulum membrane`GO:0016021^cellular_component^integral to membrane`GO:0016740^molecular_function^transferase activity`GO:0006659^biological_process^phosphatidylserine biosynthetic process	MVPSTLKVPVCETPLSSFLDFLSFDFEANKMKDDDKYRLHFRMINEQQVEDIGLDFFYKPHTITLLTLTVLSLMYFAFARDDENYDNNLRVGLLVVVFFFLVISVLAFPNGPFTRPHPAIWRMVFGLSVLYFLFLVFILFLNWDQVKILMYWLDPNLRFEKREADIMEYAVNCTVITKERILSHLDIFAFGHFAGWAMKALLIRSYGLCWTISITWELTELFFMHLLPNFAECWWDQVILDILLCNGGGIWLGMTVCHFLEMRTYSWASIKEIHTTTGKIKRAVLQFTPASWTYVRWFDPKSSFQRLAGIYLFMILWQLTELNTFFLKHIFIFKASHPLSWCRILLVGIITAPTVRQYYAYLTDTQCKRVGTQCWVFGAIAFLEALACVKFGQDLFSNT…	GGCAACAACTTTTAGAAAAAAAAAAAAACATGGAACAATTTATTTCAAACTTTGATGATATACATGTATATACATAGTGTTGACAGCCCTATGTCTTTTTTATCTACTCTTGTGAAATTTAAAGTGTCTTTTGAAACAAGTAAAAATCTTCAACTGTAGCCAGAGCCAACTCGGTGCAGAAAGCCTCATCTGGCAGTGACACCAGGCGGTCCAGGGAGATGTAGTTGGGCAGGCTGGGGTCGTACTGGGCTTTTTGGAGGTACTCAAGAAACAGGTGACGCTCTCTGACACGCAAGTACTTTGTATTGAGGATCTGTGGGAACTTTGTGATGAGATAGTGAGGCACCTTCATGGTGTTGTGGATGTAGTCAAAGATCTGGGTAAGTTTTCTTTTATTTG…
P70699	3.3903	2.35533	0.020498	sp|P70699|LYAG_MOUSE`P70699`Q:76-968,H:53-953`51.04%ID`E:0`RecName: Full=Lysosomal alpha-glucosidase; EC=3.2.1.20; AltName: Full=Acid maltase; Flags: Precursor;`Eukaryota; Metazoa; Chordata; Craniata; Vertebrata; Euteleostomi; Mammalia; Eutheria; Euarchontoglires; Glires; Rodentia; Sciurognathi; Muroidea; Muridae; Murinae; Mus; Mus.	GO:0005765^cellular_component^lysosomal membrane`GO:0005764^cellular_component^lysosome`GO:0004558^molecular_function^alpha-glucosidase activity`GO:0030246^molecular_function^carbohydrate binding`GO:0032450^molecular_function^maltose alpha-glucosidase activity`GO:0060048^biological_process^cardiac muscle contraction`GO:0002086^biological_process^diaphragm contraction`GO:0005980^biological_process…	MVSYKRLNPEDVHFSSELLPEEPRGIQEDAAVSEPEGTFLLPHRPSCSITKVLLVVGCLLLLLMGGWLIGTMFWLHSPSNQQPHKPPPPAPKPTSSSPAELNDTSSAARREACSATPEPRRFDCYPERGVVVTKEMCEARNCCFIPASDAGQTRKNGVPWCFYPPDFPSYSLVSINDTLMGQKGILVKEVKTYYPGDILTVEVETRQETDTRLRVRMTDPSNSRFEVPISVPNPTEKAENPGYVVEFSKQPFGITVRRRSTGALLLNTSVAPLFYADQFLQFSTVLPTQFIYGLGEHRSTFLHDINWNTLTMWARDVPPTEKTNLYGVHPFYLAMEEDGNAHGFFLLNSNAMDVVLQPAPALTWRTIGGILDFYVFLGPDPGSVVSQYLEVIGNPAMPI…	CTAGTGGCAAAACATCACAAGTACATCACAACAAAACCCTTTATTCAAACATTCCTTCATCACACAAATCTTTCACATTTGATTGAAAATAAAAACAGAAAAAAAAAAAATTTTCTCAAGAAAATAAAAGCAAGAAAATTAGCATCTAACTTACAGCCAAAGATTAAAAAAAACCCTCAGACTGAAAGGAGTTTACTAAAATTTCTCAGTTGCTGCATTCATTAAAAAGAAGACAGTATTTTTGCATGAACCCACAAATGACTTGCAGAGATGAAGCGAAGACAGTTGGGGTCTGTTAAGACTACATTTGTAAAATTGTTTACATCGAGAAGCATGGCTTGTTACAGAAACCAGCTTTCAGTCTTCAGTGTTAAAAACAGGTCTACAGTGTGAAGCAGA…
A2ARV4	3.3154	1.00094	0.0100157	sp|A2ARV4|LRP2_MOUSE`A2ARV4`Q:3-155,H:4046-4198`56.86%ID`E:4e-53`RecName: Full=Low-density lipoprotein receptor-related protein 2; Short=LRP-2; AltName: Full=Glycoprotein 330; Short=gp330; AltName: Full=Megalin; Flags: Precursor;`Eukaryota; Metazoa; Chordata; Craniata; Vertebrata; Euteleostomi; Mammalia; Eutheria; Euarchontoglires; Glires; Rodentia; Sciurognathi; Muroidea; Muridae; Murinae; Mus; …	GO:0016324^cellular_component^apical plasma membrane`GO:0031526^cellular_component^brush border membrane`GO:0005905^cellular_component^coated pit`GO:0030139^cellular_component^endocytic vesicle`GO:0005783^cellular_component^endoplasmic reticulum`GO:0005768^cellular_component^endosome`GO:0005615^cellular_component^extracellular space`GO:0005794^cellular_component^Golgi apparatus`GO:0016021^cellula…	GNGYMCEAEGASPMLLLPENIRIRRFNLQTEAYHDFLEEEEHIMALDYDWDHNNTGYSMVYFTVASKDAAPGSIKRAYMPSVDDGSNNIVAAVGLDIKYITSPDGIAVDWVGRNLYWADSKLKRLEVALLDGRYRKHLVKTELGHPSAVAVNPRL	TCGGCAACGGCTACATGTGTGAAGCTGAGGGAGCTTCTCCCATGCTGCTTCTCCCAGAAAACATTCGCATCCGGAGGTTCAACCTGCAGACGGAGGCTTACCACGACTTCCTGGAAGAGGAGGAGCACATCATGGCTCTGGACTATGACTGGGACCACAACAACACTGGATACAGTATGGTTTATTTCACTGTTGCTAGCAAAGACGCTGCGCCAGGTTCTATTAAAAGAGCGTACATGCCTTCAGTGGACGATGGGAGTAACAACATTGTTGCTGCTGTTGGCCTTGATATCAAATACATCACTTCACCTGATGGAATCGCCGTGGACTGGGTTGGAAGAAATCTTTACTGGGCAGACTCCAAGCTGAAGAGATTAGAAGTGGCGCTTTTAGATGGAC…
Q8CIZ5	3.29727	1.47058	0.00469251	sp|Q8CIZ5|DMBT1_RAT`Q8CIZ5`Q:2-126,H:1213-1337`48.8%ID`E:2e-26`RecName: Full=Deleted in malignant brain tumors 1 protein; AltName: Full=Ebnerin; AltName: Full=Hensin; AltName: Full=Pancrin; Flags: Precursor;`Eukaryota; Metazoa; Chordata; Craniata; Vertebrata; Euteleostomi; Mammalia; Eutheria; Euarchontoglires; Glires; Rodentia; Sciurognathi; Muroidea; Muridae; Murinae; Rattus.	GO:0031012^cellular_component^extracellular matrix`GO:0019898^cellular_component^extrinsic to membrane`GO:0016021^cellular_component^integral to membrane`GO:0030670^cellular_component^phagocytic vesicle membrane`GO:0005578^cellular_component^proteinaceous extracellular matrix`GO:0030658^cellular_component^transport vesicle membrane`GO:0042589^cellular_component^zymogen granule membrane`GO:0051636…	RSGSFYDKVTTFPYVVTLNEYLYVQVNLRRGDSTLVLFIDTCVTSPSPFDFHSRPYFLVKDGCPVDSTYYSISSGSRPYARFRFKAFQFLRATDHVYMQCKVIICPASDYNSRCRRGCRRRSKRSL	TAGATCCGGAAGTTTCTATGATAAGGTGACCACATTTCCGTATGTAGTCACACTCAATGAATACCTGTACGTCCAAGTGAACTTGAGAAGAGGTGACAGCACTCTGGTACTCTTCATCGACACCTGTGTGACTTCTCCATCACCTTTTGACTTCCATTCCAGACCTTACTTCCTGGTTAAAGACGGATGTCCTGTTGATAGCACCTACTACTCTATTAGCAGTGGTTCTAGACCTTACGCCCGTTTCAGATTTAAGGCTTTCCAGTTCCTCCGAGCTACAGATCATGTGTACATGCAATGCAAAGTCATAATCTGTCCCGCCTCCGACTACAATTCCCGCTGCCGCCGTGGCTGCAGGAGGCGGAGCAAAAGAAGCCTG
P32918	3.29167	2.06215	0.0116815	sp|P32918|APOA1_COTJA`P32918`Q:7-162,H:101-262`29.63%ID`E:1e-16`RecName: Full=Apolipoprotein A-I; Short=Apo-AI; Short=ApoA-I; AltName: Full=Apolipoprotein A1; Flags: Precursor;`Eukaryota; Metazoa; Chordata; Craniata; Vertebrata; Euteleostomi; Archosauria; Dinosauria; Saurischia; Theropoda; Coelurosauria; Aves; Neognathae; Galliformes; Phasianidae; Perdicinae; Coturnix.	GO:0034364^cellular_component^high-density lipoprotein particle`GO:0008289^molecular_function^lipid binding`GO:0008203^biological_process^cholesterol metabolic process`GO:0006869^biological_process^lipid transport`GO:0042157^biological_process^lipoprotein metabolic process	ITKVTTEADVLRERVNQELTKARENLEPYAETLRSNIEQRVEQLKQELAPYTESLDSETLRATLMQKSEELKANLEQSVKDLQTQLGPYTEDLKQKVDQHLQDFKERVAPISVRVQSEIGQRAQQVKEMASPYVEQMRERLDPYAQDLQARLTSLYDSFVKSS*	GATCACCAAGGTCACCACCGAGGCCGACGTGTTGAGAGAGCGCGTGAACCAGGAGCTGACCAAAGCCAGGGAGAACCTGGAGCCCTATGCCGAGACCTTGAGATCTAACATCGAGCAGAGAGTGGAGCAGCTCAAACAGGAGCTGGCACCCTACACCGAATCCCTGGATTCCGAGACCCTGAGGGCCACCCTGATGCAGAAGAGCGAGGAGCTTAAGGCTAACCTGGAGCAGAGCGTGAAGGACCTGCAGACCCAGCTGGGACCTTACACCGAAGACCTGAAGCAGAAGGTGGACCAGCACCTGCAGGATTTCAAGGAGAGAGTGGCACCAATTAGCGTTAGAGTCCAGAGTGAGATCGGTCAGAGAGCCCAGCAAGTGAAGGAAATGGCAAGCCCCTA…
Q15648	3.28228	0.219794	0.0351618	sp|Q15648|MED1_HUMAN`Q15648`Q:2-491,H:15-541`27.98%ID`E:2e-42`RecName: Full=Mediator of RNA polymerase II transcription subunit 1; AltName: Full=Activator-recruited cofactor 205 kDa component; Short=ARC205; AltName: Full=Mediator complex subunit 1; AltName: Full=Peroxisome proliferator-activated receptor-binding protein; Short=PBP; Short=PPAR-binding protein; AltName: Full=Thyroid hormone recepto…	GO:0016592^cellular_component^mediator complex`GO:0005730^cellular_component^nucleolus`GO:0003682^molecular_function^chromatin binding`GO:0001047^molecular_function^core promoter binding`GO:0016922^molecular_function^ligand-dependent nuclear receptor binding`GO:0036033^molecular_function^mediator complex binding`GO:0004872^molecular_function^receptor activity`GO:0001104^molecular_function^RNA pol…	MKRNSLISNLQKKFAQRSWNDTLLLVQRCMDKSRDESKPCEPLIRSLERLQDVLHAPHTSVTRSRLEVIAKQQGMGFHFTEDTCYLTADLFYLEVLLLPCGGVQEVKVALHGEGPVPSESFLKTLSEMKLKLLESLRFVVRDLQKLSGEPENCDSQQQLLNNSRIGHLIAVKEDSPLMILFYESPNDGTTAPSVIQAAQVTVDASSVPHRLQMASVLPEPLQLDSQGCPVFAPLSEVPNETLPACFLLRLKPPVPMLTSFVEELSLITDVAVAQTDLQWAPLHRLLVAGSHRSSDLLTEKLLPDGEMHRYVFPGATWDVPGQKAALVEAVPFTHPAQVPALLQLLRHQCAVNTLLRSCSSPESAGPGGARCPLMCKASLTGIPSESQLFEVRPESATSF…	GGGGGGGAAAAAAAAAGGTAAGAAGTGCAGACTTTTATGTCGCCAAAAGGTTCGGACTATAACTCCGCCTGCTGAGCACACAGACCAACAGCAGAGCAGAGGTAAGAGTTCACAGAGGGGTTTATTTCAGTTTGGGAAACGCTGTCCTCCTGCAGAGGAGCATTCTGGGAAACCGTGGCCGGATCCTCGGCTGCTACTTCCACCAAAGCAGACGGATCTTTGTCTGCGGAGGTTGGAGGAGAGGCGCTCTGTAACCTGCTGAGCAGCATCTTCATGGTCCCAGGGATGGACAAAAAATTCTTCATGTGATCTTCCACAGAGGCATCAGGTGTTTCCACTCCAAATATTCTGCAGGTAATCTGCTGGGGACTACAGACGTTCACCAGCAAAACACAGAGG…
Q5PQQ6	3.27389	1.23924	0.0133012	sp|Q5PQQ6|IQCG_RAT`Q5PQQ6`Q:45-239,H:216-416`31.19%ID`E:3e-12`RecName: Full=IQ domain-containing protein G;`Eukaryota; Metazoa; Chordata; Craniata; Vertebrata; Euteleostomi; Mammalia; Eutheria; Euarchontoglires; Glires; Rodentia; Sciurognathi; Muroidea; Muridae; Murinae; Rattus.	.	MSQEISHLCLEVEQTQSFSSLQFFSEKILKKIELENRKLTLMRQQQQIQEKTQDIKRLKFQLKMLALKVSAKKTLSEEQNLKLQYEQIQEEALQTGSLQEEELEFVKKQLGEEERAHTESQTFLLHQNQEVQKELHMREEQTQQKLNEKKQQLYDVCRKKTLALDKLMEMRRQFREMEQLVTEDKKEQQRLQEEQERVTAATKLQAWWRGCTVRRGLGPFRKTEDSGKDKKKKKKGKKK*	GGTGAGCTCTCGACCCAAAATGAGACTGAAGAAGAATGCTGGGAATCTAAATCCTTGGTGTTCTGTAGGAGAGATCCAGTCTAATCAAGCTGGTGAAAGAGTGCAAACTGATGTCACAGGAGATTTCCCATCTGTGCCTGGAGGTGGAGCAGACACAAAGCTTCAGCTCTCTGCAGTTTTTCTCAGAGAAAATACTCAAGAAAATTGAACTGGAGAACAGAAAATTGACTTTAATGAGACAACAACAACAAATACAAGAAAAAACTCAAGACATTAAAAGACTGAAATTCCAGCTGAAAATGTTGGCATTAAAGGTCAGTGCGAAGAAGACTTTGAGTGAAGAGCAAAACCTCAAGTTACAGTATGAGCAGATCCAGGAGGAGGCGCTGCAGACGGGCT…
P16444	3.26532	2.03752	0.00659589	sp|P16444|DPEP1_HUMAN`P16444`Q:1-127,H:264-388`56.69%ID`E:7e-41`RecName: Full=Dipeptidase 1; EC=3.4.13.19; AltName: Full=Dehydropeptidase-I; AltName: Full=Microsomal dipeptidase; AltName: Full=Renal dipeptidase; Short=hRDP; Flags: Precursor;`Eukaryota; Metazoa; Chordata; Craniata; Vertebrata; Euteleostomi; Mammalia; Eutheria; Euarchontoglires; Primates; Haplorrhini; Catarrhini; Hominidae; Homo.	GO:0031225^cellular_component^anchored to membrane`GO:0045177^cellular_component^apical part of cell`GO:0016324^cellular_component^apical plasma membrane`GO:0005615^cellular_component^extracellular space`GO:0031528^cellular_component^microvillus membrane`GO:0005886^cellular_component^plasma membrane`GO:0043027^molecular_function^cysteine-type endopeptidase inhibitor activity involved in apoptotic…	MVNFYNDYVTCSQKANISDVADHFDHIKKVGGAKIIGFGGDYDGVTRVPDGLEDVSKVPNLVAELLRRGWTDEDVKDALGNNLLRVMSEVERVRDNMKNQVPDDVPIPYAEVENPCRTSFGYTDAGA	AAACTATTGACCTTCATCATGCTGGAAGACTGAATCTACACTAGAAAGAGAAGAACGGAATCGTCATGGTGAACTTCTACAACGATTACGTGACCTGCAGCCAGAAGGCCAATATCTCAGATGTTGCTGATCACTTTGACCACATTAAAAAAGTGGGCGGGGCTAAAATTATTGGCTTTGGCGGAGATTATGACGGAGTCACCAGAGTGCCAGACGGTCTAGAAGATGTGTCCAAAGTGCCAAATCTGGTGGCTGAGCTGCTGAGGAGAGGCTGGACGGACGAAGATGTCAAAGATGCTCTTGGAAACAACCTGCTCCGGGTCATGAGCGAGGTTGAGAGGGTCCGTGATAACATGAAGAACCAGGTGCCGGATGATGTTCCCATTCCGTACGCCGAGG…
A5X5Y0	3.25544	0.50205	0.00370393	sp|A5X5Y0|5HT3E_HUMAN`A5X5Y0`Q:1-162,H:174-333`34.57%ID`E:3e-20`RecName: Full=5-hydroxytryptamine receptor 3E; Short=5-HT3-E; Short=5-HT3E; AltName: Full=Serotonin receptor 3E; Flags: Precursor;`Eukaryota; Metazoa; Chordata; Craniata; Vertebrata; Euteleostomi; Mammalia; Eutheria; Euarchontoglires; Primates; Haplorrhini; Catarrhini; Hominidae; Homo.	GO:0016021^cellular_component^integral to membrane`GO:0005886^cellular_component^plasma membrane`GO:0045211^cellular_component^postsynaptic membrane`GO:0005230^molecular_function^extracellular ligand-gated ion channel activity`GO:0034220^biological_process^ion transmembrane transport	QSCKISFKSIMHSDNELRLFYHTNDSELTEQSRQTIQTQYEWIFLNMTVHEKTVNHFGFNQTVIVYTITMKRRSVLYIANFLLPVLFFLCLDFASFLLSDTGGEKVGFKITVLLAVTVMQLILNDILPPSSDKIPLIAIYCIGIFTLMLLSLLETILVMYLIGKDQKSTDKTEDNQKLNDNPEDKLQFCFSGIKKCIHSASAEDTAKEDQSFPKEDSSSPQTEVSLVMEKVYEELVEIRKSKSLLSS	TTCAGAGCTGCAAAATCTCCTTCAAATCTATCATGCATTCTGATAATGAACTGAGGTTGTTCTACCATACCAACGACTCAGAGCTGACAGAGCAGTCTCGTCAAACAATCCAGACGCAATATGAATGGATTTTTCTCAACATGACAGTACACGAAAAAACTGTCAATCATTTTGGCTTCAACCAAACTGTGATTGTTTACACTATCACCATGAAGAGACGGTCTGTCCTTTACATTGCAAACTTCCTGCTGCCTGTTCTCTTCTTCCTGTGTCTGGACTTTGCCTCCTTCCTCCTGTCAGACACTGGGGGTGAGAAGGTTGGCTTCAAGATCACTGTCCTACTTGCTGTGACTGTGATGCAGCTCATTCTCAATGACATTCTGCCCCCGTCTTCAGACA…
Q5RCF7	3.22313	3.01087	0.00717373	sp|Q5RCF7|NHRF3_PONAB`Q5RCF7`Q:1-320,H:169-480`46.46%ID`E:5e-76`RecName: Full=Na(+)/H(+) exchange regulatory cofactor NHE-RF3; Short=NHERF-3; AltName: Full=Na(+)/H(+) exchanger regulatory factor 3; AltName: Full=PDZ domain-containing protein 1; AltName: Full=Sodium-hydrogen exchanger regulatory factor 3;`Eukaryota; Metazoa; Chordata; Craniata; Vertebrata; Euteleostomi; Mammalia; Eutheria; Euarcho…	GO:0005737^cellular_component^cytoplasm`GO:0016020^cellular_component^membrane	AYKAGVRAKDRLLEVNGENVEDCTHEQVVAKIKQAGNAIVFLLFDDNADKVCRSQYAKVGSRSATVKHLPHKPRIANLTKGPEGYGFMLREEPQQAGHFIKDIDRDSPAGRAALKEMDRLVAVDGKEVDNCSHEQVVDMFRQSGGECCLLVVDKETDQMYKLGKVSPIIFWEEMKDSNSPPSYTEVMNTATPAQPDEEEEEDLKPKFCRMEKAPDGYGFHLNGIQGVFGQFIKEVVKGGAADRAGLEDDDMVVEVNGVNVETSSHHEVVEMIRRSGNSLEMLVARKSVYEKLKAKGVNITRMLLGEEPKSQEPTADSPETSKKEIERPESPAKPERQRTPSVSSSSSAESIDERL*	TGGAGCTAACGGCAGAATGAGATGTGGGCTGATCGGGGGGTGTGGGGGCTCTCAGAGTCTCTCATCAATGCTCTCTGCAGATGAAGATGATGAAACCGATGGAGTCCTCTGTCTTTCTGGTTTAGCTGGACTCTCTGGTCTTTCTATCTCTTTCTTGCTGGTTTCTGGACTGTCTGCGGTTGGTTCTTGACTCTTGGGTTCCTCTCCAAGCAGCATGCGTGTGATGTTTACTCCTTTGGCTTTGAGTTTTTCATAAACACTCTTTCTGGCCACCAGCATCTCCAGAGAGTTGCCACTTCTGCGGATCATTTCCACCACCTCGTGGTGGCTGCTTGTCTCCACATTCACTCCGTTGACCTCCACCACCATGTCATCGTCCTCCAGACCTGCTCGGTCAGC…
Q14973	3.21543	1.64812	0.00741477	sp|Q14973|NTCP_HUMAN`Q14973`Q:28-334,H:21-328`51.78%ID`E:8e-83`RecName: Full=Sodium/bile acid cotransporter; AltName: Full=Cell growth-inhibiting gene 29 protein; AltName: Full=Na(+)/bile acid cotransporter; AltName: Full=Na(+)/taurocholate transport protein; AltName: Full=Sodium/taurocholate cotransporting polypeptide; AltName: Full=Solute carrier family 10 member 1;`Eukaryota; Metazoa; Chordata…	GO:0016323^cellular_component^basolateral plasma membrane`GO:0005887^cellular_component^integral to plasma membrane`GO:0008508^molecular_function^bile acid:sodium symporter activity`GO:0008206^biological_process^bile acid metabolic process	MNVTNGVHIYNDGGLSGNSSMSDTPVFRAVNMVINFLSIAILFIAMISLGCTMEISKIKAHILKPKGVAIALLAQFFVMPLSAFSLAKVLQMDPIKAVTVLICGCCPGGTLSNIFALIVKGDMNLSIVMTTCSNFAALGLMPLLLCILCQGFPGLQNAVPYVGIVTTLLCTLVACTIGILINHYKPKYSPIVNKTGMWILLISSIGLLALSAYVVKDVLWMIVMVDVLTTAALMPLIGFTLGYVVSVICKLSPKCSRTVSMETGFQNIQLCTAILKVAFPPQVIGPMFLFPLIYVAFQCGEALLMALCFTLYQRLKPPAGDKDANMHADAKQEEEEEEKKHLQEHQEWSAEDDYRRD*	ATGTGACAAAGGAGTTTAAATTCAGGGGGGCAAGAGAAGAATTGGAAGCAATACTGGAACACTGTCTGGGAGAACACTATTTGAAGCTGCATTGACCTGAAGGCAAGAAAGTTCATTTTGTCACTTGGAGCAGGCGTTTCGCTTTTAAAAAAGTGAAGATTCAAACTAATGCAAATAGAAACTTGGAGAATCTGCCACAATGAATGTGACAAACGGAGTCCACATCTACAATGACGGAGGCCTCTCGGGCAATAGCAGCATGAGCGACACCCCCGTTTTCAGAGCCGTGAACATGGTCATAAACTTTCTGAGCATTGCCATTCTCTTCATCGCAATGATTTCGCTCGGCTGCACCATGGAGATCTCCAAAATCAAGGCGCACATCCTCAAACCCAAAGG…
Q5SNQ7	3.2139	0.39143	0.0276116	sp|Q5SNQ7|SRAC1_DANRE`Q5SNQ7`Q:50-454,H:248-652`79.51%ID`E:0`RecName: Full=Protein SERAC1; AltName: Full=Serine active site-containing protein 1;`Eukaryota; Metazoa; Chordata; Craniata; Vertebrata; Euteleostomi; Actinopterygii; Neopterygii; Teleostei; Ostariophysi; Cypriniformes; Cyprinidae; Danio.	GO:0016021^cellular_component^integral to membrane`GO:0031227^cellular_component^intrinsic to endoplasmic reticulum membrane`GO:0005739^cellular_component^mitochondrion`GO:0016788^molecular_function^hydrolase activity, acting on ester bonds`GO:0006505^biological_process^GPI anchor metabolic process`GO:0006886^biological_process^intracellular protein transport`GO:0008654^biological_process^phospho…	MRPVFYLTGPQREHAVHGGTKGNEGRKKCINTKRGLKKIWDYCKQLLMLQGGLWCFGGNGLPYAQSLTSVPSEKVESFCLQALVQHSKVQSHCDHIVAKGGLLLLQRIYQLRRDSPKIQRNIIRIIGNLALNESVHQDIVQSGWLSILAEMMQSPHVMQASYAARALANLDRETVVEKYQDGVYILHPQTRNGQPVKADVLFIHGILGAAFKTWRQKDSSLLQEETEVESRSDYTECWPKSWLAADCPNLRVLSVEYDSHLSDWMSKCPAENQRKSLAYRSRDLLKKLKQAGVGERPVVWVAHSMGGLLVKKMLLDASEDPEMKDLLKNTRGVLFYSVPHHGTFMAEYSVNVRYLLFPSIEVRELCKDSPALCSLNESFVNIAKENDFKVMSFAESQAT…	CGGCAAAGTGCCTAAAATTTTCTTTCCGCTAACAAAGAAGAAGAAGGTAATTAGCTTAGCAGTAAATGAACACCGGTTGTTTACAAAAACATTACCGTGTTTATTTAAAATACACGAGTTGACAAACAAGAGGTGGAGGATGTCGGTCGCAGCTTTACGTCTGATCCGCTGTCGGAGACTGAGCACAGCTGGGCCGCCGCGTGTCAACAGAATGCTCCAGTGGAAAGATTTAGGAAAAGTTGCCAAAGTTACTAGTGCTGTTATCTTGGGAGGCTGTCTTTTCATCACTTATGAGGTGGTGGCCTTGGATAAGGCTGTGACCATTGATACAAGTGCAATTCTCCAGGAGAAATATAAGTCATATATCTATCTCAGAGCCTCTCCTGCAGCGGAAAAGGA…
P46029	3.2111	2.64054	0.0064921	sp|P46029|S15A2_RABIT`P46029`Q:3-275,H:463-729`45.82%ID`E:1e-59`RecName: Full=Solute carrier family 15 member 2; AltName: Full=Kidney H(+)/peptide cotransporter; AltName: Full=Oligopeptide transporter, kidney isoform; AltName: Full=Peptide transporter 2;`Eukaryota; Metazoa; Chordata; Craniata; Vertebrata; Euteleostomi; Mammalia; Eutheria; Euarchontoglires; Glires; Lagomorpha; Leporidae; Oryctolag…	GO:0016021^cellular_component^integral to membrane`GO:0015198^molecular_function^oligopeptide transporter activity`GO:0015293^molecular_function^symporter activity`GO:0015031^biological_process^protein transport	RTDLNIEVSFSGSKVVCQETFEEQKAHSLIIYKVDTLLQCMVVEDNIQKNTDGKPFVRFFSTLQEAMNITIGEVNFYAPPGYRMSSNDTVDRREYPSVPCDLQSEDCPDLNLGLLDFGASYTFILMKESGKIVAEKMEDVKANSVHIAWQVPQYVLLTAGEVMFSITGLEFSYSQAPSNMKSVLQAGWLLTVAFGNVIVLIVAEGAGLEQWKEFVLFAGLLLGVCIIFSIMSIFYKYVDPEGMDKMNLEDSKEEDETDEKKSSMKLNKSAKSTRM*	TGGAAATGTGAACCAAACAGTTGCTAAAATCAGTTTCTCCAATTTCTCAAAGGAAACATTTTTTTTCACATCTTTAGATTTTCTTGTGCTTTTCTTTTACAAATCTGCTCTCAAACTGTTCATCCGGATGTTGCACCAAAACTTCATTAAAATATGCTTCAGATTTATTTAGTCAGATGCTGCTTCAATAGTCTGTGATTACAATTTTACCTCAGAAAAAGACAACATACAGCACATCGTCAAATATGAATGTTATTACTGTAAAATGATGAATCCAAAAACAATCTTTTAAACCTCTTTTGTGCGTGCTGTCCTTCAGACATTTGTTTAAATCTTAGCAAAAAAGAAAGAAATGTCACTGAATGCATTTCAGAGAGAAATACTGAATTTCAAACGACA…
Q28003	3.21012	1.71957	0.0214434	sp|Q28003|CXCR2_BOVIN`Q28003`Q:3-334,H:13-340`32.25%ID`E:2e-39`RecName: Full=C-X-C chemokine receptor type 2; Short=CXC-R2; Short=CXCR-2; AltName: Full=High affinity interleukin-8 receptor B; Short=IL-8R B; AltName: CD_antigen=CD182;`Eukaryota; Metazoa; Chordata; Craniata; Vertebrata; Euteleostomi; Mammalia; Eutheria; Laurasiatheria; Cetartiodactyla; Ruminantia; Pecora; Bovidae; Bovinae; Bos.	GO:0016021^cellular_component^integral to membrane`GO:0005886^cellular_component^plasma membrane`GO:0004918^molecular_function^interleukin-8 receptor activity`GO:0006935^biological_process^chemotaxis`GO:0038112^biological_process^interleukin-8-mediated signaling pathway	MDVLLDGILNTTFDYSDFSDYNYEDNEVARSVPTVLIPVVCSVVLILGLFGNTLLLAALALRMRSWSVSDVFILHLAVADLLLLLTLPIRAAEAAWSSESSGVFCKICGAVFHINFYCGVFGLLCISLDHYLCINHSDKWRPLRKPSLAGFCCLLVWISSVLLSIPDWMFLTANKNQEQKLLCDYSYSLTTTDSLLMSRLYHHTVGFSLPVVSLMLLCSYFLPSLLCKDTGHQRSRRRSVIVILSLVLGFLLFWLPYNITLICDTALRRISQTSPKKPYGDTKDSLLSALVITSIFGYIHACLRPLIYLLCCKNFKKQVKKLLMFSNDKIKESLWELSMEEPCLQTPQEMKPMTGAQSPDQTH*	TTTTTCCTTCAGGTTTAGATGTTTAATGTCCATTTTTATTTATTTTCACACTTTTTTTTTACATAGCAACATTTCCTGTTTATGCTTAAACATCTTTCTGGACTATATAATTAGCACAGAGGTGCGGAAACAACAGTCAAACTCATATGCAGTAAGTCATATACAGGGCGGGCCGTTTCCATGCGTAAGAAAAATAACCATTCTATGTTGAACTGATTTTTGTTTATATGTTTTTATCGGTAGACCAATGTCTAGGAAGATTTTGTGGTTGATTTGCAAAAGTTCCAGTTTTCTGATATTTGTAAATTAGGTTTTCCACAACGTCGTGTGTAATGCTCATTCCATGTTTTCTGTTCAAATTTCTGCTTACCGATCCAACCATCAGTTTAATTTCAATTT…
Q1L981	3.19542	0.203643	0.0239857	sp|Q1L981|TDRD5_DANRE`Q1L981`Q:1-606,H:1-588`42.28%ID`E:3e-127`RecName: Full=Tudor domain-containing protein 5;`Eukaryota; Metazoa; Chordata; Craniata; Vertebrata; Euteleostomi; Actinopterygii; Neopterygii; Teleostei; Ostariophysi; Cypriniformes; Cyprinidae; Danio.	GO:0033391^cellular_component^chromatoid body`GO:0071546^cellular_component^pi-body`GO:0043046^biological_process^DNA methylation involved in gamete generation`GO:0030719^biological_process^P granule organization`GO:0007286^biological_process^spermatid development	MSAEDALDKLKSHIRSLLVSSKLGLNPLQLRRDYETMLGQPMPLKELGFRSVMDMAREMPDVVSVHHRPDGTTYFTAVCDESTREIADLVAKQRLTKSYKKIKNPGYQFSLSSSYKATPQAPPRRGRAPPALPAQLRAQLRILLSQGPVRLSDLQSCYCRCFGHPLNIHNYGFYSTGEMLEAVADLVCIQQSRFGSVLVLTEHLRHSQNWKPSGKPSTGPKTSGLSPTMKAFSRVPDSQVIVPTKPAAPVQQSPPPSKTPAEPAHSSSVVADEAEVEGRVDQTQPVPSLTTFEKRVLKLEEELRQQIIENSVSGVVSQDLKDKLLKVVSQANGELSVHDLPAHYKKLFDEELPLLENGFVSVTELVGVLTDIFLVKPANDDDKNHLVVMDVNNVDNKQP…	ACAGATGAACGTGGTGTTTCCAGCGGAACAGTCCGTCAAAGATTAAACTTCTACAATGCGCTACACAATGAGTTACAGCCTGCCCTGCTCGCCGGGAACCTCTCCGCCCCGGTCGGTAGTGTCTTACAGAGCGCGGTACCACAGTGCATCAGGAGCCAGCGTGGTTGCAATCGATAACAAGATTGAGCAGGCCATGGATCTGGTGAAGAGCCACCTGATGTATGCTGTCCGTGAGGAGGTAGAGGTGCTGAAGGAGCAGATCAAGGAGTTGTATGAGAGGAACTCGATGCTGGAGCGCGAGAACGCCGTGCTGAAGTCTTTGGCGAACACGGAGCAGCTCAGCCAGCTGACGGGTCAGAGCAGCACCACGTCAACGCCGGTGCAGCAGCTCCACCACCT…
Q8N3H0	3.18115	3.14916	0.0283955	sp|Q8N3H0|F19A2_HUMAN`Q8N3H0`Q:22-127,H:27-130`79.25%ID`E:4e-44`RecName: Full=Protein FAM19A2; AltName: Full=Chemokine-like protein TAFA-2; Flags: Precursor;`Eukaryota; Metazoa; Chordata; Craniata; Vertebrata; Euteleostomi; Mammalia; Eutheria; Euarchontoglires; Primates; Haplorrhini; Catarrhini; Hominidae; Homo.	GO:0005737^cellular_component^cytoplasm	MRERGPRICGVGVWSLLLSLCLASLTHAHRSHTVHVKAGTCEVIAAHRCCNKNKIEERSQTVKCSCFPGQVAGTTRAMPSCVDASIVAQKWWCQMEPCMEGEECKVLPDLTGWSCSTGNKVKTTKVTR*	GTTTTCATTTGAAATTTTTAATTCATTTCATATAATACTGACACATGTACTCAATAGAGGTTAACAGGCGTTTTAAAAACACAGATATTAAAACCATTAGAGCATCAGTTTACCTTTAGCCCAGGTGATTCCACGACCCCGTTCTGTTACGGGTTTTAAATGTTGCAGTGCACCGTTACATCTACTTGGTATTAGTCTAACCTCAACTTTGAAAGGACTTTGAAAAACATAAGAGAAAAAAAAGTAGACTGATAAACTGTAGGCATCAGAAAAATGGCATGTGGTAAACCACAAAGGGAAAATATTTTCATCTTCTCCTGGAATAAGAAAAATAAAATGGGGTCAGGAAAGAAAAAGATTCATTTGCAGATCCGGGATACATTATGAGAAAAGTGGGAG…
Q5R613	3.18098	0.432018	0.00508454	sp|Q5R613|SNX6_PONAB`Q5R613`Q:9-221,H:177-389`26.48%ID`E:2e-10`RecName: Full=Sorting nexin-6;`Eukaryota; Metazoa; Chordata; Craniata; Vertebrata; Euteleostomi; Mammalia; Eutheria; Euarchontoglires; Primates; Haplorrhini; Catarrhini; Hominidae; Pongo.	GO:0030659^cellular_component^cytoplasmic vesicle membrane`GO:0031901^cellular_component^early endosome membrane`GO:0005634^cellular_component^nucleus`GO:0035091^molecular_function^phosphatidylinositol binding`GO:0007154^biological_process^cell communication`GO:0006886^biological_process^intracellular protein transport`GO:0042147^biological_process^retrograde transport, endosome to Golgi	FLTSSDPPGRQKVKKNIFNRLSQAVEEMRKEGHKDVDDFFQTKRDHNFLLTGYTKMAAEKFLDVVLTEQKIAVACGHFSTALHLCMEQGENPEKQDFSQVCVKLSEVFNSIKKSMTSTAMNDMNTLGLGLDLETRYQEAEKEMLFRRTCKLVELQNATKNAEKAKPVKKAVMEEAKKATETEFRQICEVAKKDIIQLESKHVETLQQALVQWCEKQLLTAKETAEVYSQHLQTFKRMQ*	TTCCTGACCAGCTCAGATCCTCCAGGAAGACAGAAAGTAAAGAAAAACATTTTCAACCGGCTGAGTCAAGCTGTGGAGGAGATGAGGAAAGAAGGCCATAAGGACGTGGACGACTTCTTCCAAACCAAGCGAGATCACAACTTTTTGCTAACTGGCTACACCAAGATGGCCGCTGAGAAATTCCTGGATGTGGTGCTTACAGAGCAAAAAATCGCAGTTGCCTGCGGCCACTTTTCAACCGCTCTTCACCTCTGCATGGAACAAGGGGAGAACCCGGAAAAGCAGGATTTTTCTCAGGTTTGTGTGAAACTATCAGAAGTCTTCAATTCTATAAAGAAAAGCATGACGAGCACCGCCATGAATGACATGAACACTCTCGGACTGGGTCTGGACCTGGAG…
Q4TU93	3.17261	0.670382	0.0182055	sp|Q4TU93|MRC2_RAT`Q4TU93`Q:22-122,H:211-301`37.86%ID`E:1e-08`RecName: Full=C-type mannose receptor 2; AltName: Full=Endocytic receptor 180; AltName: Full=Macrophage mannose receptor 2; AltName: CD_antigen=CD280; Flags: Precursor;`Eukaryota; Metazoa; Chordata; Craniata; Vertebrata; Euteleostomi; Mammalia; Eutheria; Euarchontoglires; Glires; Rodentia; Sciurognathi; Muroidea; Muridae; Murinae; Ratt…	GO:0016021^cellular_component^integral to membrane`GO:0005886^cellular_component^plasma membrane`GO:0030246^molecular_function^carbohydrate binding`GO:0006897^biological_process^endocytosis	NEDCIHLRGHNHAEPGLFNDDFCTSTREYICKKAKGLGPPPQPPTSGPGWNDKCGSWMFDPFNDFCYLFNFLSMRTWSEARADCLNQGGDLVSITDPFEQAFIQGVIQQSPTGISLWMGGHDS	ACAACGAGGACTGCATCCACCTGAGGGGACACAATCACGCGGAGCCCGGATTGTTCAACGATGACTTCTGCACCTCCACTCGGGAATATATCTGCAAAAAAGCTAAAGGACTTGGACCTCCTCCTCAGCCTCCCACATCTGGACCAGGATGGAACGATAAATGCGGATCGTGGATGTTCGACCCCTTTAACGACTTCTGCTACCTTTTCAACTTCCTGTCCATGAGAACTTGGTCTGAGGCTCGAGCTGACTGCCTCAACCAAGGAGGAGATCTGGTCAGCATCACAGACCCGTTCGAGCAAGCCTTCATTCAGGGTGTGATCCAGCAGTCTCCCACCGGCATCTCTTTGTGGATGGGGGGCCACGACTCGG
Q86YI8	3.16709	2.8749	0.00936503	sp|Q86YI8|PHF13_HUMAN`Q86YI8`Q:7-326,H:5-300`47.56%ID`E:2e-67`RecName: Full=PHD finger protein 13; AltName: Full=Survival time-associated PHD finger protein in ovarian cancer 1; Short=SPOC1;`Eukaryota; Metazoa; Chordata; Craniata; Vertebrata; Euteleostomi; Mammalia; Eutheria; Euarchontoglires; Primates; Haplorrhini; Catarrhini; Hominidae; Homo.	GO:0005654^cellular_component^nucleoplasm`GO:0005634^cellular_component^nucleus`GO:0003682^molecular_function^chromatin binding`GO:0046872^molecular_function^metal ion binding`GO:0035064^molecular_function^methylated histone residue binding`GO:0008270^molecular_function^zinc ion binding`GO:0051301^biological_process^cell division`GO:0016568^biological_process^chromatin modification`GO:0007076^bio…	MGDINPSTSNAFQSEGFSPPYRKRRTVEDFNKFCTFVLAYAGYIPYPQEESQLRSSSSPPNSTGSTADSDGWTPGLPASCPQRPTKVPQDRNRKRPQAGLALSGHTRRDHTITSLHPDDHGKADKLKKKKRRKERDHHSFEESRAQQAHSALPEAHPSLSFGGRMIKEEPEDDISIPLHPTCLPSPSSCKEEPKEEHHSWDGRDLEEGVIKVQKVEGFAGNRTVFRQGKQVVFRDEDGSGEDEDIMVDSDDDSWDLVTCFCMKPFAGRAMIECNKCNTWIHLSCAKIRKSHVPETYVCQSCRDADGTPDARRSHRSRVGSRKHLLD*	CAAGGTAAAATGGTAACTCTTTATTTACAATACTGTACAATAGTTTCACAGAAACAGTTTGCAACACAGTACAGACGAGGCTTCCTCAGCAAGGGGATCCAGAAGTGGAATAAACCATCCCAATAACCATCGGTAAGAATGCTCCCGGCTTCAGGACACAAACCAAAACGTAGATTTTCTAGTCTGCCTTCAGCCAAAAAAACTGTAACCTCTGAGAAGTCTTCCCATCTCAGTGACTGCTGGTTCAAACTCGTAAACGAAGGTTGGTAAAAACCAGAGAACAAGAAAAACTACAAAACTCTGGAAGCTTTTTTCTACAAACTCCATTCCATGTGTCAGATGTTTCCCGGTAAAGTCATGGATTCTGGACCATCACCTGGGGGTTGTTTGCACCAAAAA…
P98164	3.16382	1.60709	0.0116835	sp|P98164|LRP2_HUMAN`P98164`Q:1-265,H:3204-3468`54.89%ID`E:5e-93`RecName: Full=Low-density lipoprotein receptor-related protein 2; Short=LRP-2; AltName: Full=Glycoprotein 330; Short=gp330; AltName: Full=Megalin; Flags: Precursor;`Eukaryota; Metazoa; Chordata; Craniata; Vertebrata; Euteleostomi; Mammalia; Eutheria; Euarchontoglires; Primates; Haplorrhini; Catarrhini; Hominidae; Homo.	GO:0016324^cellular_component^apical plasma membrane`GO:0031526^cellular_component^brush border membrane`GO:0005905^cellular_component^coated pit`GO:0030139^cellular_component^endocytic vesicle`GO:0005783^cellular_component^endoplasmic reticulum`GO:0005768^cellular_component^endosome`GO:0005615^cellular_component^extracellular space`GO:0005794^cellular_component^Golgi apparatus`GO:0016021^cellula…	SNRYYIRNLTIDGSQLSIVLQGLSNVVALDYDHSEKRLYWLDSGTAKIERMRFDGSDRELVVENVVGAQGLAVDWVGRKAYWADGFYGSIHVVELDGRYKKKLLSGHFKNGNDTFIISRPRALALNPKYGWLYWTDWGADAYIGRAGMDGSNISAIITTKLEWPNALTIDYTTNKIFFADAHLNFLDFADMDGQNRHRAIAGALPHVFAVSLFEDWVYWTDWNTHTVEKAHKYTGEQRTIMGNNTHRPYDIHVYHPYRQPKSENP	AGGGGTTTTCACTTTTGGGTTGTCTGTATGGATGGTAGACGTGAATGTCATAGGGTCGATGTGTGTTGTTGCCCATGATGGTGCGCTGCTCTCCAGTGTACTTGTGGGCTTTTTCTACTGTATGTGTGTTCCAGTCCGTCCAGTAGACCCAGTCTTCAAACAGGGACACGGCAAAAACGTGGGGAAGTGCGCCAGCGATGGCCCGGTGCCGGTTCTGACCATCCATATCTGCAAAGTCTAAAAAGTTCAGATGTGCATCAGCAAAAAAGATCTTGTTGGTTGTGTAGTCAATGGTCAGAGCGTTGGGCCACTCCAGCTTGGTTGTGATGATGGCACTGATATTGCTTCCATCCATGCCAGCTCTGCCAATGTAAGCGTCAGCGCCCCAGTCAGTCCAAT…
Q8C129	3.15836	4.84145	0.028035	sp|Q8C129|LCAP_MOUSE`Q8C129`Q:8-1032,H:5-1025`52.42%ID`E:0`RecName: Full=Leucyl-cystinyl aminopeptidase; Short=Cystinyl aminopeptidase; EC=3.4.11.3; AltName: Full=Oxytocinase; Short=OTase;`Eukaryota; Metazoa; Chordata; Craniata; Vertebrata; Euteleostomi; Mammalia; Eutheria; Euarchontoglires; Glires; Rodentia; Sciurognathi; Muroidea; Muridae; Murinae; Mus; Mus.	GO:0012505^cellular_component^endomembrane system`GO:0016021^cellular_component^integral to membrane`GO:0048471^cellular_component^perinuclear region of cytoplasm`GO:0005886^cellular_component^plasma membrane`GO:0004177^molecular_function^aminopeptidase activity`GO:0046872^molecular_function^metal ion binding`GO:0008237^molecular_function^metallopeptidase activity`GO:0008270^molecular_function^zi…	MDLFGGNSSESANLPRNMIENSMFEEEPDVVDLAKDSATFPTFPALDPDEITYEPRSSRLLVRGLGENDMDEDEEDCESSARLLGMSFMNRSSSHRPSSSPYTRQSPSRSCSRPSARTLIVCVLILVIVASMTMVLYFLPGCTFTKDGCPKPNKTAPLELIYPVSTSGELFPWTQLRLPQSIHPLSYELTLTPDLDNMTFTGIAVINMSVLHKTNRIVLHGANLNISKATFKIGDGQARNVTVLEYKPKQQIAVKFTEDLKADQFCVLTLTYSANLSSTYDGFYSSSYTDKSGKKHILAATQFEPLSARKAFPCFDEPAFKATFLIKINRKENYTTLSNMPQTQSRLLPSGLFQDEFERTSVNMSTYLVAFVVANFSPVNTSVSGTLVSVYSVPEKKEH…	GCATTCTAATTTGATGAGAGGCTGTCAACAGCAGCTTTGGAGAGGGGAAAAGTGCAATTTTCTCACATTACTTCAGTTTCGATTAAACAAATTGTAACGTTTAAGGCTTAAATGTTTTTCTGTACTATTAGGATGTGTCCTCATACCATTTTAAAACGCATCTATTTGCATTGAAGTTATGGGAATCGGCTAAGTCATAATTGTCAGAAGTTAGCTAGTCCTAAGATAGCTTCTACGTAGTTAGCTAACGGTTGTACAGTGGAGCTGCTGTTTACTGTGTGCGGTAGACCGAGCCGGGCGGTGAGGCGCTGTAACACCACCCCGTCTGTTGAAGGTCCTTAAACCAACACGTTTTCCAGCGTTTTGGACTCGTGGAGGCCTTTGACGCGGTTTCGACAT…
O75157	3.1524	1.07843	0.0179385	sp|O75157|T22D2_HUMAN`O75157`Q:25-111,H:672-759`75%ID`E:3e-30`RecName: Full=TSC22 domain family protein 2; AltName: Full=TSC22-related-inducible leucine zipper protein 4;`Eukaryota; Metazoa; Chordata; Craniata; Vertebrata; Euteleostomi; Mammalia; Eutheria; Euarchontoglires; Primates; Haplorrhini; Catarrhini; Hominidae; Homo.	GO:0003700^molecular_function^sequence-specific DNA binding transcription factor activity`GO:0006970^biological_process^response to osmotic stress	MRYTMSYSLPCSPGTSPPRSVVSYRARYHSASGASVVAIDNKIEQAMDLVKSHLMYAVREEVEVLKEQIKELYERNSMLERENAVLKSLANTEQLSQLTGQSSTTSTPVQQLHHLPLVANSTASLLHLDGSPSIPHQPNISSA*	ACAGATGAACGTGGTGTTTCCAGCGGAACAGTCCGTCAAAGATTAAACTTCTACAATGCGCTACACAATGAGTTACAGCCTGCCCTGCTCGCCGGGAACCTCTCCGCCCCGGTCGGTAGTGTCTTACAGAGCGCGGTACCACAGTGCATCAGGAGCCAGCGTGGTTGCAATCGATAACAAGATTGAGCAGGCCATGGATCTGGTGAAGAGCCACCTGATGTATGCTGTCCGTGAGGAGGTAGAGGTGCTGAAGGAGCAGATCAAGGAGTTGTATGAGAGGAACTCGATGCTGGAGCGCGAGAACGCCGTGCTGAAGTCTTTGGCGAACACGGAGCAGCTCAGCCAGCTGACGGGTCAGAGCAGCACCACGTCAACGCCGGTGCAGCAGCTCCACCACCT…
Q90953	3.11465	1.271	0.0445523	sp|Q90953|CSPG2_CHICK`Q90953`Q:1-72,H:3391-3465`40%ID`E:2e-10`RecName: Full=Versican core protein; AltName: Full=Chondroitin sulfate proteoglycan core protein 2; Short=Chondroitin sulfate proteoglycan 2; AltName: Full=Large fibroblast proteoglycan; AltName: Full=PG-M; Flags: Precursor;`Eukaryota; Metazoa; Chordata; Craniata; Vertebrata; Euteleostomi; Archosauria; Dinosauria; Saurischia; Theropoda…	GO:0005578^cellular_component^proteinaceous extracellular matrix`GO:0005509^molecular_function^calcium ion binding`GO:0030246^molecular_function^carbohydrate binding`GO:0005540^molecular_function^hyaluronic acid binding`GO:0007155^biological_process^cell adhesion	MGGHDSVTEGGWEWTDGSPFRYIRWNAGNPDDYYGEDCLSILINNGYWNDDNCQYNRGYICKRRGNTPKPPPPHDGFLTAVVCEGSSAVLHCPHDSVINIQSAFFGRKSNDICPHFEGSEGSCTVQGVFPQYRKQCDNRPFCFAYAHVEQDPCPTISKYLE	GGATGGGGGGCCACGACTCGGTCACGGAGGGCGGCTGGGAGTGGACAGACGGCTCTCCCTTCAGATACATCCGCTGGAACGCAGGCAACCCAGATGACTATTATGGCGAGGACTGTCTGTCTATTCTTATCAACAATGGCTACTGGAATGACGACAACTGTCAGTACAACAGAGGCTACATCTGCAAGCGTAGAGGAAACACCCCTAAACCTCCTCCACCCCACGACGGTTTTCTGACGGCTGTGGTCTGCGAGGGCTCCAGTGCCGTCCTTCACTGTCCACACGACAGCGTCATCAACATCCAGTCGGCCTTCTTCGGACGGAAGAGCAACGACATCTGTCCTCACTTTGAGGGGTCCGAAGGCAGCTGCACCGTTCAGGGTGTCTTCCCTCAGTACA…
P53670	3.11212	3.08628	0.0177605	sp|P53670|LIMK2_RAT`P53670`Q:8-624,H:12-630`69.45%ID`E:0`RecName: Full=LIM domain kinase 2; Short=LIMK-2; EC=2.7.11.1;`Eukaryota; Metazoa; Chordata; Craniata; Vertebrata; Euteleostomi; Mammalia; Eutheria; Euarchontoglires; Glires; Rodentia; Sciurognathi; Muroidea; Muridae; Murinae; Rattus.	GO:0005801^cellular_component^cis-Golgi network`GO:0005829^cellular_component^cytosol`GO:0005739^cellular_component^mitochondrion`GO:0005634^cellular_component^nucleus`GO:0005524^molecular_function^ATP binding`GO:0046872^molecular_function^metal ion binding`GO:0004674^molecular_function^protein serine/threonine kinase activity`GO:0008270^molecular_function^zinc ion binding`GO:0007286^biological_p…	MEEPESYCAGCGGKTQDSFHMKVLQDTWHNACFQCSVCSDHLTNWYYENDGKLYCRKHYLEKFGEFCHGCSLLMTGPAMVAEEHKYHPECFVCLSCKVVIEDRDTYALVERSKLYCGRCYKQEVLKPMLEKHSQDSVIHSLPHTVTLISMPSAANGKRGFSVSVLRDVAGSANVQVKEVRGMLISPEVRNAIHVGDRILEINGLPVDTLMEQQVDNLIHCTSHTLQLLIEHDPVRLRLGSPRNQLGVPATSRMRLSSPSDAILERTDVADEGTLKRRSLRRSNSICKSPGPNSPKESPLIGKDIGRSESLRSPSSCSHRIFRPCDLIHDEVLGKGFFGQAIKVIHKATGEVMVMKELIRCDEETQKTFLKEVKVMRSLDHPHVLKFIGVLYKDKRLNLI…	TTCGTGATTTCAAATGAAACTTTAATTGTTTTTTTTCAAAATTTGTGATATGGACAAAAACTTAAACATCAAAGGCCTTCTGTAAACTGATTGCTTATAAAACAAATGAAGTGTTCTTCTAATTTGGTAAAAAATAAAAAATAAAAATAAGGGGTTCCAAAAACATTCAGCAGTAATCCCAGAAAAAAACCAGTCTCAAGCAACTGCTTCACCGTCACGAAAACAAATCAAATAAAAAAATAAATAAAAATAGATCAACTAATTTTAATCAGGTAACACTACAGCAACATAAATAAAAGTGGTTACAACTAGTCATTTTCGCATTATTGTAGCAATATGCTGCAGAAATATCAAAATAAGAGTACAAACTCCCCATCTAAAAAACAAAAGGAACTTCTA…
P97881	3.10172	5.08482	0.025085	sp|P97881|MUC13_RAT`P97881`Q:56-400,H:136-528`25.81%ID`E:2e-20`RecName: Full=Mucin-13; Short=MUC-13; Flags: Precursor;`Eukaryota; Metazoa; Chordata; Craniata; Vertebrata; Euteleostomi; Mammalia; Eutheria; Euarchontoglires; Glires; Rodentia; Sciurognathi; Muroidea; Muridae; Murinae; Rattus.	GO:0005576^cellular_component^extracellular region`GO:0016021^cellular_component^integral to membrane`GO:0005886^cellular_component^plasma membrane	LKRGLSFICASIFFLPKMAQKFFFYCVFGIVVALCGVTTTTVNSITTATGSSITTTTESTTTTTTGSTTTTTPGSTTTPGNTTTPGNSTASEETSPVTSAPPVTTKPDPCGSNPCGGGSTCEARAVNFTCLCLPGDSYNEDAKVCQKAKVFPGQVSVPGLTYVEELKDKTSTAFKTQSEKIIAAMDKVFGSDLTYIGCVVLEFRQKQKRMTRAGEAEAEAIVDLSFKSESEVTGNKVVDSIKNCEGCDVTFVATNLCERNSCDVNTTNCTASDGSFSCACQDGYIKSGYTERLCLACPSGQKAVNSESCDACDFGYSGFNCSENWQLILVIVGAVLGGLALIFLISLIVVSLKSPKKKFNKSDEAEDVKPYISHFSTKAPLGGNSMKNDYTSQTSAPTG…	GGAGGTAAAATAAGACGTCAAGTTTCAGCCTCACTTTTCATACCAAACGCGATGACATGAAATATCACAGACTTGATTTATGACAGATCATAGCTGGTGAACTAATGAGTCAAAGTGATGATCAAATATGATGAAATTAGTGCTCATTTTTACACTTCTGCTCTAATTAAACCTGTCACTGGAGTAGTAAGGGTTGGAGTGGCCTTGGTTCTGAGCGTACGGGTTGTACTGGGCTTGATTCTGGCTGTAGGGGTTGTTCTGCGGTCGAGTCTGAGTGAAGGAGTTGTTGGGTCGAGAGTATGGGCTGTCGTGATCTTCACTGAGCCACGAGTTTCTGTTTGAAGGGATCAGGTTTTGCCGGCTGTTGCCTGGCATCATCTCCATGTTGCTCCTGTTGTC…
P43005	3.09551	1.4717	0.0159148	sp|P43005|EAA3_HUMAN`P43005`Q:1-121,H:402-524`76.42%ID`E:3e-48`RecName: Full=Excitatory amino acid transporter 3; AltName: Full=Excitatory amino-acid carrier 1; AltName: Full=Neuronal and epithelial glutamate transporter; AltName: Full=Sodium-dependent glutamate/aspartate transporter 3; AltName: Full=Solute carrier family 1 member 1;`Eukaryota; Metazoa; Chordata; Craniata; Vertebrata; Euteleostom…	GO:0005887^cellular_component^integral to plasma membrane`GO:0016595^molecular_function^glutamate binding`GO:0015501^molecular_function^glutamate:sodium symporter activity`GO:0005313^molecular_function^L-glutamate transmembrane transporter activity`GO:0017153^molecular_function^sodium:dicarboxylate symporter activity`GO:0070779^biological_process^D-aspartate import`GO:0051938^biological_process^L…	TVASIGAAGVPNAGLVTMVIVLTAVGLPANDVTLIVAVDWLLDRFRTMINVLGDAYGAGIVQKLSKMELERMDLISDVDVANPFAMEATLDDEECEKKSYVNGGFTVDKTDAISFTETSQF*	GGGAGTCAGACCCCAGGCCTGGAGGGCCGACATCCTGCTGGCCCCCCAGAAACCACGCCCCGCCTGCTGTTGATCACCTGGATCCCCTTTGAAAACTTCAATATCAGGTTAGTGGTAAAACAAATGGATCACTGGTCCTCCAGGCATGGAGTTTGACACCTCCTGTGCTTTCAAATATTGCTTCATGCAACTTTGAGAAAAAATGCAAAGTGTTTGGCACAATTTAATTCTGCATATATTTATAGAACAATATTAGTATCCAAGCAGTGCATTTAAGGACAAATAAATGTGTAACTTCTGACACAAAGGAGTTAGATTATATCTAATGTCTTGCTAAGTGATGTTCAGTACTGTGCAGACAGTCAACTTTTCTAGGCAGAGATTTACTTTGGGCTAGCC…
Q99LL3	3.0899	2.69135	0.0284251	sp|Q99LL3|CHSTC_MOUSE`Q99LL3`Q:60-334,H:124-417`49.66%ID`E:1e-75`RecName: Full=Carbohydrate sulfotransferase 12; EC=2.8.2.5; AltName: Full=Chondroitin 4-O-sulfotransferase 2; AltName: Full=Chondroitin 4-sulfotransferase 2; Short=C4ST-2; Short=C4ST2;`Eukaryota; Metazoa; Chordata; Craniata; Vertebrata; Euteleostomi; Mammalia; Eutheria; Euarchontoglires; Glires; Rodentia; Sciurognathi; Muroidea; Mur…	GO:0000139^cellular_component^Golgi membrane`GO:0016021^cellular_component^integral to membrane`GO:0047756^molecular_function^chondroitin 4-sulfotransferase activity`GO:0016051^biological_process^carbohydrate biosynthetic process`GO:0030206^biological_process^chondroitin sulfate biosynthetic process`GO:0030208^biological_process^dermatan sulfate biosynthetic process	MGSKKGFLAVISLLGFMIFIILTTRGLDFYQQKTAPISIIKQSPRKDVLKQHSAALRSTKQQRLRQDLLRRNCAAVNLSLEDLNSTYLNNFIVDDKHGIIYCYIPKVACTNWKRTLIALNSSKPFPDPMSFEQRWVHNFDRFKHLKDFPQAERKEKLQHYFKFLFVRDPFVRLISAYRDKMQHYDQYFYKGYVRVILQLYKNQTNLTYSHEVAKKKGLQPSFYDFIQYLLDPRTERYAPFEPHWRQMHRLCHPCLVEYDFVGHQETLQEDAQELLKMLKLEDDIKFPPSYENMTSTDSVKDWFQNVPLEDRRKLYKIYEKDFQLFGYRRPTELLDE*	TGATTCTCATGATGTTAATTAGAGGTGGAATGTAAAGTAAACCATCATGGGATCAAAAAAAGGATTCCTGGCTGTCATTTCCTTGTTGGGATTCATGATTTTTATTATTTTGACAACTCGTGGTTTGGATTTTTACCAGCAAAAAACAGCACCAATATCTATAATAAAGCAAAGTCCAAGAAAGGATGTTCTGAAGCAACACAGTGCTGCGCTGAGATCTACAAAACAGCAAAGACTACGACAGGATCTTCTGAGGAGAAACTGTGCTGCTGTGAACCTGAGTTTGGAGGATTTGAACAGTACATACTTGAATAACTTTATTGTGGATGACAAACATGGCATCATCTACTGCTACATTCCCAAGGTGGCCTGTACCAACTGGAAGAGAACCTTGATCGC…
P48167	3.07269	1.20956	0.00252319	sp|P48167|GLRB_HUMAN`P48167`Q:6-493,H:9-497`83.67%ID`E:0`RecName: Full=Glycine receptor subunit beta; AltName: Full=Glycine receptor 58 kDa subunit; Flags: Precursor;`Eukaryota; Metazoa; Chordata; Craniata; Vertebrata; Euteleostomi; Mammalia; Eutheria; Euarchontoglires; Primates; Haplorrhini; Catarrhini; Hominidae; Homo.	GO:0030054^cellular_component^cell junction`GO:0034707^cellular_component^chloride channel complex`GO:0005887^cellular_component^integral to plasma membrane`GO:0045211^cellular_component^postsynaptic membrane`GO:0016934^molecular_function^extracellular-glycine-gated chloride channel activity`GO:0016594^molecular_function^glycine binding`GO:0007340^biological_process^acrosome reaction`GO:0007628^b…	RKIAIFLLVLCLCLDGGSAKEKGAKKGKKKGKQVYCPSQLSSEDLARVPANSTSNILNRLLITYDPRIRPNFKGIPVEDRVNIFINSFGSIQETTMDYRVNIFLRQRWNDPRLKLPDDFKSDSLTVDPKMFKCLWKPDLFFANEKSANFHDVTQENILLFIFRNGDVLISMRLSVTLSCPLDLTLFPMDTQRCKMQLESFGYTTDDLQFMWQTGDPVQMDAIALPQFDIRQEDIDYGNCTKFYEGTGYYTCVEVIFTLRRQVGFYMMGVYAPTLLIVVLSWLSFWINPDASAARVPLGILSVLSLSSECTSLASELPKVSYVKAIDIWLIACLLFGFASLVEYAVVQVMLNSPKRIEAEKAKIASKEKAAGKSPAARNNTVNGTGGTPLHASTLHVAET…	GTGTTCATTTTTATTTACGTCAAATGGTGAAAAGTCATTTGATCATTTACTTTGCTTGTAAGTTTCACAAAAACACATCACAGCTCACTGAAGAGCCATTTTACACAGTAACAACGAGGACATACATTTGTTAAGGGAGTGGCAGTGTCACGTGACCATCTGGACAGGAACAGGAGTGTATCAGGTATCCATACAACTTCTCTACAATAGGAATCATAAAATTTAGTAAACATCTGATATATGCATATGTGTTTCTATTTGTATTTTTATATACATGCAATATTTTAACATGCAATGTAATTACAATATCACACCTTGCATTAATAAATATGAAAGGTTGATTTTATCTGCACCTTCAGTTCAGTTCTTACACTCTGCTTTGTTTCTGCAATCCTGTCC…
P48774	3.05697	4.46657	0.00119481	sp|P48774|GSTM5_MOUSE`P48774`Q:2-217,H:5-221`65.9%ID`E:3e-85`RecName: Full=Glutathione S-transferase Mu 5; EC=2.5.1.18; AltName: Full=Fibrous sheath component 2; Short=Fsc2; AltName: Full=GST class-mu 5;`Eukaryota; Metazoa; Chordata; Craniata; Vertebrata; Euteleostomi; Mammalia; Eutheria; Euarchontoglires; Glires; Rodentia; Sciurognathi; Muroidea; Muridae; Murinae; Mus; Mus.	GO:0005737^cellular_component^cytoplasm`GO:0004364^molecular_function^glutathione transferase activity`GO:0042803^molecular_function^protein homodimerization activity`GO:0006749^biological_process^glutathione metabolic process`GO:0043627^biological_process^response to estrogen stimulus	MSMTLGYWDIRGLAHPTRLLLEYTGTKYEEKTYVCGEAPNYDKSGWFNVKFKLGLDFPNLPYLVDGDKKIVQSNAIQRYLARKNKLCGETEEEKIRLDMLENVVVDFRMSFIRMCYTDYDNLKPEYLKTLPDVLKQFSDFLGNRKWFAGDRLTFGDFIMYDVLDQQRIFLPTCLDAFKNLKDFLDRFESLERISAFMKSGRYIRTPIHNRMAKWGNKKI*	AGAGAGCATCCAAAAGGCATATAGCTCCGATCATCTCTGCAGCTCCACTAACCAGCGCCGTCTGCAGAAGTTTCCTCAGAAGTGTCTGATCCAGCAACTCGATCAACATGTCTATGACTCTGGGATACTGGGATATTCGTGGGCTCGCCCACCCCACCCGCCTTCTGCTGGAGTACACCGGCACCAAGTATGAGGAGAAGACCTACGTGTGTGGAGAAGCACCAAACTATGACAAAAGCGGCTGGTTCAATGTGAAATTCAAGCTCGGACTGGACTTCCCCAATCTGCCCTACTTAGTGGATGGTGACAAAAAGATCGTGCAGAGCAATGCTATCCAGAGGTACCTGGCCAGGAAGAACAAGCTTTGTGGAGAAACTGAAGAGGAGAAGATTCGACTGG…
Q9DBX3	3.02387	0.541933	0.0207108	sp|Q9DBX3|SUSD2_MOUSE`Q9DBX3`Q:1-352,H:452-803`41.69%ID`E:3e-79`RecName: Full=Sushi domain-containing protein 2; Flags: Precursor;`Eukaryota; Metazoa; Chordata; Craniata; Vertebrata; Euteleostomi; Mammalia; Eutheria; Euarchontoglires; Glires; Rodentia; Sciurognathi; Muroidea; Muridae; Murinae; Mus; Mus.	GO:0016021^cellular_component^integral to membrane`GO:0030247^molecular_function^polysaccharide binding`GO:0005044^molecular_function^scavenger receptor activity`GO:0006955^biological_process^immune response	FITFDGVRYSFNGKGEYTLVTSADKQLTIQGRTEPVDGSAIKATKMSAVAMREASSDIIEVRLASGQNRLEVLHNQKSLYFAEQTWMDLQGVFVFSPTPSNVTVMFPSGAGVEVRQRGETLTTTVLLPEEFKDSTQGLLGKMNGDAKDDLALSNGQLVKNQSDPEELFDFGASWAVPNASALFTYDSDYLRETYYLVPRHDPTFIPAFSIPENPEDPLSDQAAEICSGESSPFCRYDILVGRSPSMGNETRRSFQSHITLVEDLKPVITCGWLPPPIDGKKLGTTYLQGARVQFSCNDGYTLKGSAERVCQENAQWSGEEASCVVPSKLPGILAGSIVGAATLILIVTIIVLQ	ATTGGAGCACAATAATTGTTACGATCAAAATCAGTGTTGCAGCTCCAACAATTGAACCAGCCAAAATTCCTGGGAGTTTACTCGGAACAACGCAGCTGGCTTCCTCTCCAGACCACTGAGCGTTTTCCTGGCAGACTCTTTCTGCTGATCCTTTCAGCGTGTAGCCGTCGTTGCACGAAAACTGCACCCTGGCTCCCTGTAGGTAGGTGGTCCCGAGCTTTTTCCCATCAATTGGAGGTGGAAGCCATCCACAAGTTATTACTGGTTTTAAATCCTCAACAAGAGTTATGTGACTCTGGAAAGACCTTCTGGTTTCATTTCCCATGCTTGGACTTCGACCTACCAGGATGTCATACCTGCAGAACGGAGAGCTTTCTCCAGAGCAGATCTCAGCTGCCT…
O70247	3.02364	1.43094	0.00626372	sp|O70247|SC5A6_RAT`O70247`Q:9-600,H:23-620`65.45%ID`E:0`RecName: Full=Sodium-dependent multivitamin transporter; Short=Na(+)-dependent multivitamin transporter; AltName: Full=Solute carrier family 5 member 6;`Eukaryota; Metazoa; Chordata; Craniata; Vertebrata; Euteleostomi; Mammalia; Eutheria; Euarchontoglires; Glires; Rodentia; Sciurognathi; Muroidea; Muridae; Murinae; Rattus.	GO:0031526^cellular_component^brush border membrane`GO:0016021^cellular_component^integral to membrane`GO:0012506^cellular_component^vesicle membrane`GO:0008523^molecular_function^sodium-dependent multivitamin transmembrane transporter activity`GO:0015878^biological_process^biotin transport`GO:0015887^biological_process^pantothenate transmembrane transport	MATAAPMQFTTVDYVIFALLLVASTGIGLFYAFSGGRQRTTQEFLMADRSMSCLPVSLSLLATFQSAVAILGAPSEVYAFGTQYWFLGCSYFLGLLIPAHVFIPVFYRLRLSSAYEYLELRFNKTVRVCGTVTFIFQMVIYMGVVLYAPALALNAVTGFDLWGAVLAMGLVCTLYTALGGLKAVIWTDVFQTVVMFAGQLAVIVVGASQAGGMAEVWRKAVNGSRISGLDLNPDPLQRHTFWTLGVGGVFLMLALYGVNQAQVQRYLSSRSEKEAIMSCYVVFPCQQIVLSLGCLMGLVMFARYGEDSPLEQGYVQSNDQMVLYFVMDVFRDLPGLPGLFVACLFSGALSTISSAFNSLATVTMEDLIKPHFPAMTEARATLLSKGLALVYGLVCLAMA…	GGAGACACCATGGAGACACGATGAGGAGGAGAGGAAGAATTCTGATCCTGATCCAGATCCTGATCCAGATGAGCCTCATCCCGTCATGACAGCACGGTTCCTGCAGCCATGAAGACGAGCTCATGGCTGAACCTCCGCCGCTCTAGACCCTAACTCCACCCATCTGACCCCATACTGGGGGCTGGATCACCTGGATTAACTTGATCTAATCTAATCTAATCCTTTGAATCTCCTCTGATTGGTTTGTGCGGCTCAAATCAGCTGCATGCATGTGGCTGAGCGTGCACGAGAAAGTGCTGGCAGAATCTAACATGGAGTGGGCGTGGTCACAGGGCCGTCTCCACCACGGCATGCGCGCTCAGCTGGCAGGAAAGCTCCTCGGAGCTGCTGAGCGCCGCC…
P35227	2.99289	3.74804	0.0370736	sp|P35227|PCGF2_HUMAN`P35227`Q:8-312,H:6-337`56.29%ID`E:1e-95`RecName: Full=Polycomb group RING finger protein 2; AltName: Full=DNA-binding protein Mel-18; AltName: Full=RING finger protein 110; AltName: Full=Zinc finger protein 144;`Eukaryota; Metazoa; Chordata; Craniata; Vertebrata; Euteleostomi; Mammalia; Eutheria; Euarchontoglires; Primates; Haplorrhini; Catarrhini; Hominidae; Homo.	GO:0016604^cellular_component^nuclear body`GO:0000790^cellular_component^nuclear chromatin`GO:0035102^cellular_component^PRC1 complex`GO:0001739^cellular_component^sex chromatin`GO:0003682^molecular_function^chromatin binding`GO:0003677^molecular_function^DNA binding`GO:0046872^molecular_function^metal ion binding`GO:0003700^molecular_function^sequence-specific DNA binding transcription factor ac…	MDKMQPNRVKITELNPHLTCPLCAGYLIDATTIVECLHSFCKTCIVTFLETNKFCPRCDIQVQKSCPQLSIRADKTLQDIVYKLVPGLFKDEMKRRRDFYAENRVLEPGEVVETFNIAEDEIISLSIQFYERNKNNERQRSETEGDKANGKRFLQCPAAMSVMHLAKFLRSKMDIPNNYRVEVLYGDEPLKDYYTLMDIAYFYEWRRTGPIPLQYLVKPARKRRRPSQTTTQGHSDGINTSPTSESDSHSDKVHSPAAAAQTPRASTQSSPASHTPSPAIQSPNGTTVPNNTQRHTHTSKQGSGSRKVTVNGTSSGAGKEEARGGDKSGLLPAT*	AAAGAAAACAAAACAAAAAAAAAGCTTCTCCTGCTGGAAAATACTTGTTGGTTTCCGTGTCGGGGCCTTAAAAAAAGTGCATCAATGGTTTTAATAACAAAACATGTCACCTGATGAGTTGTTGCTTAAATCAGACACTTAAACAGCATTTTGGAAAGGGACTGTTTAAAGGCAAAGACTACTTCCTGGTTTCCTTTACATTCAGCCAGCGTAGTGAGCCACGCTATGAAGCCTTTAGGATATTTTGGTTTTCAAGTGAAGCTGTGAGAAGTACGTCTGAGGAGTCTGAAACCAAAAAAATCTCAGCATTTTTACTTTATAAACCAAAACAGACTTACTCTGACAAAATCTACTTTTGGTAATGTGGTTAGTGCTACATTTTCTACAACAGTTACAGCT…
Q61830	2.98996	1.76856	0.0208879	sp|Q61830|MRC1_MOUSE`Q61830`Q:5-123,H:725-840`35.2%ID`E:5e-13`RecName: Full=Macrophage mannose receptor 1; Short=MMR; AltName: CD_antigen=CD206; Flags: Precursor;`Eukaryota; Metazoa; Chordata; Craniata; Vertebrata; Euteleostomi; Mammalia; Eutheria; Euarchontoglires; Glires; Rodentia; Sciurognathi; Muroidea; Muridae; Murinae; Mus; Mus.	GO:0009986^cellular_component^cell surface`GO:0010008^cellular_component^endosome membrane`GO:0016021^cellular_component^integral to membrane`GO:0005886^cellular_component^plasma membrane`GO:0005537^molecular_function^mannose binding`GO:0004888^molecular_function^transmembrane signaling receptor activity`GO:0006898^biological_process^receptor-mediated endocytosis	PIEGGYSWTDGTPLSHTNWGPGEPNNHEGREECVEMVSSTNGTFSWWNDLNCDAHQDWICEISKGKNPINPPEPPPPVPAPDCGSNPGWRKNNNICYYYNDTDIVDFPTAMRRCFHEKATLVSI	GATGGAGACGAGCGTGGCCTTCTCGTGGAAGCAGCGCCTCATCGCTGTGGGGAAGTCCACGATGTCCGTGTCGTTGTAGTAGTAGCAGATGTTGTTGTTCTTTCTCCAGCCGGGGTTGGAGCCACAGTCGGGAGCTGGCACTGGGGGCGGGGGCTCTGGGGGGTTGATGGGGTTCTTTCCTTTGGAGATCTCGCAGATCCAGTCCTGATGAGCGTCGCAGTTCAGGTCGTTCCACCAGGAGAAGGTCCCATTGGTGCTGCTCACCATCTCCACGCATTCCTCGCGGCCCTCGTGGTTATTGGGCTCCCCGGGGCCCCAGTTGGTGTGAGATAGAGGCGTGCCGTCAGTCCAGGAGTATCCTCCTTCTATCGG
Q9ULY5	2.98559	0.956913	0.0361461	sp|Q9ULY5|CLC4E_HUMAN`Q9ULY5`Q:38-176,H:76-209`35.21%ID`E:6e-16`RecName: Full=C-type lectin domain family 4 member E; AltName: Full=C-type lectin superfamily member 9; AltName: Full=Macrophage-inducible C-type lectin;`Eukaryota; Metazoa; Chordata; Craniata; Vertebrata; Euteleostomi; Mammalia; Eutheria; Euarchontoglires; Primates; Haplorrhini; Catarrhini; Hominidae; Homo.	GO:0016021^cellular_component^integral to membrane`GO:0030246^molecular_function^carbohydrate binding`GO:0004872^molecular_function^receptor activity`GO:0006955^biological_process^immune response`GO:0050715^biological_process^positive regulation of cytokine secretion	DTQAGSCAAVIKDQTNEFGEWRSHACRYERPYMCKRPVNTTCPLGWKTFAGNCYWMVTNNRLLTSWHEALTRCSHMGAHLLIINSEEEQFFINGNLPDFHNVDIPDIWIGLSDMIQDGVFKWVDKTDTTFSNYGPSWPQNTEGSWDCGQIFTGNYQGKWETTNCFKSLGFVCELTGGESLKPTAAP	GACACACAGGCCGGCTCGTGCGCTGCAGTCATCAAGGATCAAACCAACGAATTTGGGGAGTGGAGGTCCCACGCATGCAGATACGAGCGCCCGTATATGTGCAAACGCCCCGTCAACACCACCTGCCCTCTCGGATGGAAAACCTTTGCAGGGAACTGCTACTGGATGGTCACTAATAATAGGCTCCTGACCTCCTGGCATGAGGCGCTCACCAGGTGCTCTCATATGGGGGCTCACCTGCTGATCATAAACAGTGAAGAAGAACAGTTCTTCATCAACGGAAACCTTCCGGACTTTCACAACGTGGACATCCCTGACATCTGGATCGGCTTATCAGATATGATCCAGGATGGGGTTTTCAAATGGGTGGATAAAACAGACACCACCTTTTCAAACTAC…
Q5SXJ3	2.97917	0.148452	0.0101143	sp|Q5SXJ3|FANCJ_MOUSE`Q5SXJ3`Q:21-340,H:1-309`44.55%ID`E:2e-62`RecName: Full=Fanconi anemia group J protein homolog; Short=Protein FACJ; EC=3.6.4.13; AltName: Full=ATP-dependent RNA helicase BRIP1; AltName: Full=BRCA1-associated C-terminal helicase 1; AltName: Full=BRCA1-interacting protein C-terminal helicase 1; Short=BRCA1-interacting protein 1;`Eukaryota; Metazoa; Chordata; Craniata; Vertebrat…	GO:0005737^cellular_component^cytoplasm`GO:0005634^cellular_component^nucleus`GO:0051539^molecular_function^4 iron, 4 sulfur cluster binding`GO:0005524^molecular_function^ATP binding`GO:0004003^molecular_function^ATP-dependent DNA helicase activity`GO:0003677^molecular_function^DNA binding`GO:0046872^molecular_function^metal ion binding`GO:0006281^biological_process^DNA repair`GO:0006357^biologic…	LPDSCRCSLFLKCCVLVNRNMASSAVEYTIGGVKIRFPCKAYPSQLAMMNSIIRGLNNGQHCLLESPTGSGKSLALLCSTLAWQRAQFDKMQDGGCAGNKSPSEKSSGDCKKPETPTPCLCECHRRTSQASAAAPNGVMDLMVSPCKASPQPSHAVPKHEPSPAETQARKASIASCLSGKLQASLNSNGNREDDFKPDRKRIRSAEHRSQKRPRLQNGVIFIDDEPELEVEPSGFQADTPNNQGASSCCVSEPCSCCPCASTKDAAKKQDKDNRKRIPKIFFGTRTHKQITQIAHELKRTVYSSVHMTILSSRDHTCVNPEVVPHFNRNERCKDLLEAKNVRMDNTNTLAI*	AGCTTCCGGACTCGTGTCGGTGCAGCTTGTTTCTAAAGTGTTGTGTTTTGGTGAACAGGAACATGGCTTCGTCTGCGGTGGAATATACCATCGGGGGAGTCAAGATCCGCTTTCCCTGCAAGGCCTATCCCTCCCAGCTGGCCATGATGAATTCCATCATCCGGGGCTTGAACAATGGGCAGCACTGTCTCCTGGAGAGTCCGACTGGCAGTGGAAAGAGTTTGGCCCTCCTCTGCTCCACTCTGGCCTGGCAACGGGCTCAGTTTGACAAAATGCAGGATGGAGGCTGCGCGGGGAACAAAAGTCCGTCAGAAAAATCCTCAGGAGACTGTAAGAAGCCAGAGACCCCCACCCCATGTCTGTGTGAGTGTCACAGAAGGACCAGCCAGGCTTCAGCTG…
Q3ZMH1	2.97414	1.00161	0.0438221	sp|Q3ZMH1|SC5A8_DANRE`Q3ZMH1`Q:1-488,H:119-610`68.56%ID`E:0`RecName: Full=Sodium-coupled monocarboxylate transporter 1; AltName: Full=Electrogenic sodium monocarboxylate cotransporter; Short=zSMCTe; AltName: Full=Sodium solute symporter family 5 member 8 protein; AltName: Full=Solute carrier family 5 member 8;`Eukaryota; Metazoa; Chordata; Craniata; Vertebrata; Euteleostomi; Actinopterygii; Neopt…	GO:0016021^cellular_component^integral to membrane`GO:0015355^molecular_function^secondary active monocarboxylate transmembrane transporter activity`GO:0015293^molecular_function^symporter activity`GO:0006814^biological_process^sodium ion transport	YLELRFSRPIRLIGTSMYIVQTVLYTGLVIYAPALALNQITGLDLWGVLVATGLVCIVYCSLGGLKAVIWTDVLQMGIMLAGFVAVIARGAVIRGGLGQIWEDARQGGRLKAFDFDPDPLKRHTFWSIVIGGSIMWASIYSINQSQVQRYISCKTLGHAKMSLYVNMVGLWVTVSLAVFSGLTMYSIYKNCDPLSNGDVSAADQLLPYLVMDILADFPGIPGLFVAAAYSGTLSTVSSSINALVAVTVEDFIFPVWKNLTQRQISWLNMGLSVFFGGVCIGMAGVASLMGGVLQAALSIFGMISGPLLGLYLLGMLFRTPNSTGGLVGMVTGLVLTLWVGIGGQVYPPTADKTNPLPLTTAGCNNTMSQNYTTATPWATSASLTTQSSFRPDIADSWYS…	TATCTTGAGCTGCGCTTCAGTCGACCCATTCGATTAATTGGAACATCTATGTACATCGTACAAACGGTTTTGTACACAGGCTTAGTCATCTATGCTCCAGCTCTTGCCCTGAATCAAATCACTGGATTGGATCTGTGGGGTGTGCTGGTCGCGACTGGACTCGTTTGCATAGTCTACTGTTCTTTGGGTGGCCTCAAAGCAGTCATCTGGACAGATGTGCTGCAGATGGGGATCATGCTGGCAGGATTTGTTGCTGTCATCGCTAGAGGAGCTGTAATAAGAGGAGGCCTGGGCCAAATCTGGGAAGATGCTAGACAAGGAGGCCGACTGAAAGCTTTTGACTTTGACCCTGACCCCCTGAAGCGCCACACCTTTTGGAGCATAGTGATTGGTGGCAGC…
P53453	2.97152	2.69001	0.00208638	sp|P53453|DRD2L_TAKRU`P53453`Q:1-375,H:93-463`86.77%ID`E:0`RecName: Full=D(2)-like dopamine receptor;`Eukaryota; Metazoa; Chordata; Craniata; Vertebrata; Euteleostomi; Actinopterygii; Neopterygii; Teleostei; Euteleostei; Neoteleostei; Acanthomorpha; Acanthopterygii; Percomorpha; Tetraodontiformes; Tetradontoidea; Tetraodontidae; Takifugu.	GO:0016021^cellular_component^integral to membrane`GO:0005886^cellular_component^plasma membrane`GO:0004952^molecular_function^dopamine neurotransmitter receptor activity`GO:0007212^biological_process^dopamine receptor signaling pathway	EVVGEWRFSKIHCDIFVTLDVMMCTASILNLCAISIDRYTAVAMPMLYNTRYSSRRRVTVMISVVWVMSFAISCPLLFGLNNTATRDESLCVIANPAFVVYSSIVSFYVPFIITLLVYVQIYVVLRKRRKRVNTKPKQRICQAVDTDGATSLKDKCTHPEDVRLCTMIVKSNGSFPVNKKKVIFIKDVANDGEDLELDELNNSGSSQKQKQLTQSVLGDTPATSHQQLMPSKANASPTSTPPTPPEEGQKAEKNEDTTDVLTDPAPIVAKAFQTQALPNGKTQTSVKTLSKRKISQQKEKKATQMLAIVLGVFIICWLPFFITHILNTHCTKCKVPAEMYNAFTWLGYVNSAVNPIIYTTFNVEFRKAFIKILHC*	GTAGTGTAGCATGCATCACATTGTCATTGCAGGCATATTATCACAGTCGATGTAAGAAAAACTATGTACAGTACAGTAAAGTATATAAATAATAATAATGATGATGGTATAGATTTATTATTTTTATAAAATTGAAAAATGTACATATTGGCGTTGCTGCACTGTACAGCAAATGAATCTTCCCTTTGACACACATTCCTGTCAGTGATATAGATTTCAATATAAGAGCTGACTCGTCCTTTATAACACTGTATGAAACACTGATGTCTGTAAGATTTGCAGAAAGTCTCCATCATCAAAACATGAAATGCACACACTTTTAAATATCCGTTTGCATGTGTGTGATATACACAGATGGCTCCTTACGTAACAAGCACAATGATTTTAAAGAACAAGGTT…
P98164	2.96364	1.18628	0.0271222	sp|P98164|LRP2_HUMAN`P98164`Q:1-184,H:3491-3674`60.33%ID`E:2e-61`RecName: Full=Low-density lipoprotein receptor-related protein 2; Short=LRP-2; AltName: Full=Glycoprotein 330; Short=gp330; AltName: Full=Megalin; Flags: Precursor;`Eukaryota; Metazoa; Chordata; Craniata; Vertebrata; Euteleostomi; Mammalia; Eutheria; Euarchontoglires; Primates; Haplorrhini; Catarrhini; Hominidae; Homo.	GO:0016324^cellular_component^apical plasma membrane`GO:0031526^cellular_component^brush border membrane`GO:0005905^cellular_component^coated pit`GO:0030139^cellular_component^endocytic vesicle`GO:0005783^cellular_component^endoplasmic reticulum`GO:0005768^cellular_component^endosome`GO:0005615^cellular_component^extracellular space`GO:0005794^cellular_component^Golgi apparatus`GO:0016021^cellula…	CECPDNFIGLAVGFKIQCVADCSSTQFRCGDNERCVPIWWKCDGHSDCGDGSDEPQTCPPRLCPVGQFQCQDGNCTYPGFICDGNANCPDGSDEDAALCSDHRCDSNQFQCKNKKCIPVSWHCDGVNDCADGSDEDPETCAQKTCSPGQFQCANGRCILSSYVCDAQDDCGDGSDEPYETCSKTYIN*	GTCTGTTCCATCAGTTAATGTATGTCTTACTACAGGTTTCATATGGTTCATCAGATCCATCTCCACAGTCATCCTGGGCATCACACACGTAGCTTGAAAGTATACAGCGGCCATTCGCGCACTGAAACTGTCCCGGGCTGCACGTCTTCTGGGCACAGGTCTCTGGATCTTCATCGCTGCCGTCAGCACAGTCATTCACTCCATCACAGTGCCAGGAAACAGGGATACACTTTTTGTTTTTACACTGGAACTGGTTGGAGTCACATCGGTGATCACTGCAGAGAGCAGCATCCTCGTCTGAGCCGTCGGGGCAGTTTGCGTTGCCGTCACAAATAAAACCGGGGTAGGTGCAGTTCCCATCTTGGCACTGGAACTGACCCACAGGGCATAAGCGAGGTG…
P35463	2.9577	0.375014	0.00600958	sp|P35463|EDNRB_PIG`P35463`Q:28-411,H:56-443`70.41%ID`E:4e-161`RecName: Full=Endothelin B receptor; Short=ET-B; Short=ET-BR; AltName: Full=Endothelin receptor non-selective type; Flags: Precursor;`Eukaryota; Metazoa; Chordata; Craniata; Vertebrata; Euteleostomi; Mammalia; Eutheria; Laurasiatheria; Cetartiodactyla; Suina; Suidae; Sus.	GO:0016021^cellular_component^integral to membrane`GO:0005886^cellular_component^plasma membrane`GO:0004962^molecular_function^endothelin receptor activity`GO:0017046^molecular_function^peptide hormone binding`GO:0048484^biological_process^enteric nervous system development`GO:0035645^biological_process^enteric smooth muscle cell differentiation`GO:0048246^biological_process^macrophage chemotaxis…	MRASVLLCVFMVMEVGASRLVRDSQSGPEALEVSETNSSVQLPLPQPGRPRGPFPPMCVKPTEIKDAFKYVNTIISCLIFVVGIIGNSTLLRIIYRNKCMRNGPNVLIGSLALGDLLYIIIAIPINVYKLIAEDWPFGVYICKLMPFIQKASVGITVLSLCALSIDRYHAVTSWSRVKGMGIPLWKAVEVTLIWLVAVVLAVPEALAFDMMEMPYRGNKLRICLLHPEQPTSFMKFYREAKDWWLFGFYFCLPLACTGIFYTLMTCEMLSRKKGMRIALNDHMKQRREVAKTVFCLVLIFAFCWLPLHLSRILKKTVYDENDPNRCELLSFLLMMDYIGINMASLNSCINPIALYFVSQKFKNCFQSCLCCWCYRTSPLDERGSGGRWKGSCQVNGLDR…	GAGCCGCTGCTACGCGCCCCGTCCAATTTACCCGCGGGAGCGCGCATAAATCAACAGCGAAGAAATAAATAAACAAATAATCAAAAAAAAGAAAAACGCGTGGGATTGGAGGAATTTTACTGGATTATTTCTAATTTATCTTGAAAACGCATTTCCACATCGCAGCTCGGACTGATAAACATACCCTCCAATTCAGACCAGAGGCAACACCATCCTGTAAGCGTGAGGATGAGGGCCAGTGTGCTGCTGTGCGTCTTCATGGTCATGGAGGTCGGAGCCTCCCGCTTAGTCCGCGACTCCCAGAGTGGGCCCGAAGCTTTAGAAGTCTCAGAGACCAATTCCTCAGTCCAGCTTCCGCTCCCCCAGCCTGGTCGCCCGAGGGGCCCCTTCCCCCCCATG…
Q99LL3	2.92683	2.05063	0.0322015	sp|Q99LL3|CHSTC_MOUSE`Q99LL3`Q:8-349,H:85-417`44.32%ID`E:6e-77`RecName: Full=Carbohydrate sulfotransferase 12; EC=2.8.2.5; AltName: Full=Chondroitin 4-O-sulfotransferase 2; AltName: Full=Chondroitin 4-sulfotransferase 2; Short=C4ST-2; Short=C4ST2;`Eukaryota; Metazoa; Chordata; Craniata; Vertebrata; Euteleostomi; Mammalia; Eutheria; Euarchontoglires; Glires; Rodentia; Sciurognathi; Muroidea; Murid…	GO:0000139^cellular_component^Golgi membrane`GO:0016021^cellular_component^integral to membrane`GO:0047756^molecular_function^chondroitin 4-sulfotransferase activity`GO:0016051^biological_process^carbohydrate biosynthetic process`GO:0030206^biological_process^chondroitin sulfate biosynthetic process`GO:0030208^biological_process^dermatan sulfate biosynthetic process	ESLECCSRSESGLCPSPTSAQTSSAFVLSSLRGSISPRRLDYSSNDSHDAPISIIKQSPRKDVLKQHSAALRSTKQQRLRQDLLRRNCAAVNLSLEDLNSTYLNNFIVDDKHGIIYCYIPKVACTNWKRTLIALNSSKPFPDPMSFEQRWVHNFDRFKHLKDFPQAERKEKLQHYFKFLFVRDPFVRLISAYRDKMQHYDQYFYKGYVRVILQLYKNQTNLTYSHEVAKKKGLQPSFYDFIQYLLDPRTERYAPFEPHWRQMHRLCHPCLVEYDFVGHQETLQEDAQELLKMLKLEDDIKFPPSYENMTSTDSVKDWFQNVPLEDRRKLYKIYEKDFQLFGYRRPTELLDE*	GAATCTCTGGAGTGCTGCAGTCGGTCCGAGTCTGGACTCTGCCCCTCCCCCACATCGGCACAGACCAGCTCAGCCTTTGTTTTATCCAGCCTGCGAGGGTCCATCTCACCTCGGCGTCTGGATTACTCCTCTAATGATTCTCATGATGCACCAATATCTATAATAAAGCAAAGTCCAAGAAAGGATGTTCTGAAGCAACACAGTGCTGCGCTGAGATCTACAAAACAGCAAAGACTACGACAGGATCTTCTGAGGAGAAACTGTGCTGCTGTGAACCTGAGTTTGGAGGATTTGAACAGTACATACTTGAATAACTTTATTGTGGATGACAAACATGGCATCATCTACTGCTACATTCCCAAGGTGGCCTGTACCAACTGGAAGAGAACCTTGATCGCT…
Q9ES07	2.92215	2.45597	0.0124826	sp|Q9ES07|S15A2_MOUSE`Q9ES07`Q:54-481,H:37-467`62.12%ID`E:1e-160`RecName: Full=Solute carrier family 15 member 2; AltName: Full=Kidney H(+)/peptide cotransporter; AltName: Full=Oligopeptide transporter, kidney isoform; AltName: Full=Peptide transporter 2;`Eukaryota; Metazoa; Chordata; Craniata; Vertebrata; Euteleostomi; Mammalia; Eutheria; Euarchontoglires; Glires; Rodentia; Sciurognathi; Muroide…	GO:0016021^cellular_component^integral to membrane`GO:0015198^molecular_function^oligopeptide transporter activity`GO:0015293^molecular_function^symporter activity`GO:0015031^biological_process^protein transport	GTFTGELPSASINDRALTRASSQLNAGGRAWTAGTSFRCCSRDPEKQDNMSKKLCGTNYPLSICFIVVNEFCERFSYYGMKALLTLYFVTYLKWDKDLSTAIYHAFSSLCYFTPILGALIADSWLGKFKTIIYLSIVYVIGHVVKSVGAIPTVGNTDVHIALSMVGLILIAIGTGGIKPCVAAFGGDQFDEEHVSERQKFFSIFYMSINAGSLLSTLITPVLRGDVQCFGGDCYALAFGVPAALMIVALVVFIAGSSLYKRNPPQGNILLQVCKCIGFAIKNRWRNSKQEPKRKHWLDWAEEKYSKRLIQEIKMVLRVLILYIPLPMFWALFDQQGSRWTLQATRMNMAFGDSFNIKPDQMQMLNALLILLFVPIFDLIIYPLVGLCKIKITPLRKMAT…	CTTCAATGTTTAGATCGGTCCTGGAGGTCTCCAGTTCAAGCATCTCATATTTAGGAGGGTCCTGAAGGTATGCGAAGGTGTCTGGAAATATGTCATTATTAGGGATTTTCACGCTGATGTCTCCTTGTACTAAGTTGACGACCTGCAGGAGACATTTTCCTGCAGGTGCGGGATCCACCACTGTTTTCACAACATTTATCTCCACCAGCGTGGCTGCTACAAAAGCGAGCGCTGCAAAAATCATCCCGGTGGCCATTTTCCTCAGAGGCGTGATTTTGATTTTGCAAAGCCCAACGAGTGGATATATGATGAGGTCAAAGATGGGCACAAAGAGAAGAATCAGCAGAGCATTCAGCATCTGCATTTGGTCAGGCTTAATATTGAAGGAATCTCCAAATG…
Q96RG2	2.92048	0.171128	0.0492827	sp|Q96RG2|PASK_HUMAN`Q96RG2`Q:594-1087,H:793-1290`43.63%ID`E:2e-116`RecName: Full=PAS domain-containing serine/threonine-protein kinase; Short=PAS-kinase; Short=PASKIN; Short=hPASK; EC=2.7.11.1;`Eukaryota; Metazoa; Chordata; Craniata; Vertebrata; Euteleostomi; Mammalia; Eutheria; Euarchontoglires; Primates; Haplorrhini; Catarrhini; Hominidae; Homo.	GO:0005794^cellular_component^Golgi apparatus`GO:0005634^cellular_component^nucleus`GO:0005524^molecular_function^ATP binding`GO:0035091^molecular_function^phosphatidylinositol binding`GO:0004674^molecular_function^protein serine/threonine kinase activity`GO:0004871^molecular_function^signal transducer activity`GO:0045719^biological_process^negative regulation of glycogen biosynthetic process`GO:…	MATRNHQLSSFLPGSLPHPSTSPETEESLFSLLISGGFDLPEYPSTLNPNKAILTVSSKTGEILSANEQANKLFEAPSVELVGKKISSLLKRTNQVLEEALEENDVLADGTIAAVHGKVVDAVTLSGEVPVSLCTYREPESEDRLLVITETVERVSAHFSFSQDGRILTCDGAFAHLHGYLNPEDLKGAAIKNLIPSLQIPLYSHALPKLLRAQRVFGESRDGTSVPLCVKLQSTVLCGKPPSQNDEHSSTRDGRELSDDECNQWGPHQDERNVPNPPKQSRDKSSDDKVDDITASLSPLLEYCGTVWVFVPRSSLLLLHPDGSIFSIHNHLALGLFGYSKEELLGKSVSFLMPGFYRWMSDENKKAGSLCESHIELPKSPTSSRISDPSSLVAGDMAM…	TTGTGGTAAAATATTTATTAACGCAAAAATAAATATATAAAGTATTTTAAATATGCACACACATTTTAATTAAAAGCTTAAAAAAGGTTAAGAAACCTTTAGGTCATACAGCATTTCAAAGGTCTGGAGTTGGGCCCGTTTTTAATGGAAAAACGAGATTATTGTCAGTTATTTTACCACCAACTATCTTTAAAAAGAATTTAAAAAATAGTATTATTAAAATATTCAACAAAAATATAAAACATCAAGATGTATGACATCTCTAGGATTATAAAGACTTAAAAACAAGTTTCTCAGATGTACTAAAGCGAGCTTCCCTTTATCTTTTGCTTCTCGTTTCTTCAGAATGTTGGAATTCACTCCCTTTAAACTCAGTCCTCACAGAGGTACTTCTGAAGC…
Q2TBN3	2.91315	0.0350128	0.0199573	sp|Q2TBN3|CETN2_BOVIN`Q2TBN3`Q:1-174,H:1-172`78.16%ID`E:6e-73`RecName: Full=Centrin-2;`Eukaryota; Metazoa; Chordata; Craniata; Vertebrata; Euteleostomi; Mammalia; Eutheria; Laurasiatheria; Cetartiodactyla; Ruminantia; Pecora; Bovidae; Bovinae; Bos.	GO:0005814^cellular_component^centriole`GO:0005932^cellular_component^microtubule basal body`GO:0032391^cellular_component^photoreceptor connecting cilium`GO:0071942^cellular_component^XPC complex`GO:0005524^molecular_function^ATP binding`GO:0008026^molecular_function^ATP-dependent helicase activity`GO:0005509^molecular_function^calcium ion binding`GO:0003676^molecular_function^nucleic acid bindi…	MATTAKRPSLQGPVPPPRKKTTPKAELTEEQKQEIREAFELFDTDGSGFIDVKDLKVAMRALGFEPKKEEIKKMISEVDKDATGKISFADFLTVMTQKMAEKDSKEEILKAFRLFDDDETGKISFRNLKRVAKELGENLTDEELQEMIEEADRDGDGEVNQEEFLRIMKKTCLY*	AACTGCTTCAATATATTTTATCTGTTCAGCTCCACTCACAAAATACAAACCATTCAGCGATAGAGAAGAAAAACTTTGCACGACAGAAGGTTAGATATGCAAAAAATACAACATTCATACTTCAAAGATGGAAGGGGGCGTGTGAGAAGGGCGTGCGGGTCAGAGGGGGGCCTGTGGGGCCACTTCCCTGATTGTGGTGGTCGGACCATTCAGAGGCACAAAAGGGAGACCCTCACCGGTGTCCAAGAAACATCAATGGAAAACAAAATACTTGGAGAGGGGAAGAAACACAATTTTCAGGCACTGTAAAGTTCTGAAGAATAAATAAGCTACCTGGAATCATAAACATAGATTTATATTCTTCATAAAAAGTCTGCAGCATTCCAAACAGGACACTTT…
Q3UV31	2.89896	1.74378	0.0336566	sp|Q3UV31|RN223_MOUSE`Q3UV31`Q:109-201,H:65-161`44.44%ID`E:4e-15`RecName: Full=RING finger protein 223;`Eukaryota; Metazoa; Chordata; Craniata; Vertebrata; Euteleostomi; Mammalia; Eutheria; Euarchontoglires; Glires; Rodentia; Sciurognathi; Muroidea; Muridae; Murinae; Mus; Mus.	GO:0016021^cellular_component^integral to membrane`GO:0046872^molecular_function^metal ion binding`GO:0008270^molecular_function^zinc ion binding	IPSEDIDTQRSFSYSTPGSDQCVPPSPPPKISTGQSFPPASHHQSVSSQTSLGQNVQPPDASLPLPAFTPTPSWGLTQDSLSTPNPYLPVDDNPPHQVTVDVPSPDLQPSPFSPQCSEECPELECSVCFSQFNNVFRCPKMLHCKHTFCLECLARINVKSAEPNAILCPLCRGLTPLPTLGLPKLTTDSDVLSYLPAAMQRVYSIRFIRNKGKLQVKRAPERGRSSVTSLGPTNRTLN	ACGTTCAGCGTGCGGTTGGTCGGGCCTAGAGACGTCACTGAACTGCGTCCCCTTTCAGGAGCTCTCTTGACCTGCAGCTTCCCTTTGTTTCGGATGAAGCGGATGCTGTAGACCCTCTGCATGGCGGCCGGCAGGTAGGACAGCACGTCTGAGTCCGTGGTCAGCTTTGGGAGGCCAAGGGTGGGCAGGGGTGTGAGTCCGCGACATAGCGGGCACAGGATGGCATTGGGCTCGGCTGACTTGACATTAATGCGTGCCAGGCACTCCAGGCAGAAGGTGTGCTTGCAGTGGAGCATCTTCGGGCAACGGAACACATTGTTGAACTGACTGAAGCAGACGGAGCACTCCAGCTCCGGACACTCCTCGGAGCACTGAGGTGAGAAGGGAGAGGGCTGCAGG…
O15013	2.86913	0.00629239	0.0171846	sp|O15013|ARHGA_HUMAN`O15013`Q:157-1426,H:112-1369`63.74%ID`E:0`RecName: Full=Rho guanine nucleotide exchange factor 10;`Eukaryota; Metazoa; Chordata; Craniata; Vertebrata; Euteleostomi; Mammalia; Eutheria; Euarchontoglires; Primates; Haplorrhini; Catarrhini; Hominidae; Homo.	GO:0005813^cellular_component^centrosome`GO:0005829^cellular_component^cytosol`GO:0005089^molecular_function^Rho guanyl-nucleotide exchange factor activity`GO:0051298^biological_process^centrosome duplication`GO:0022011^biological_process^myelination in peripheral nervous system`GO:0033126^biological_process^positive regulation of GTP catabolic process`GO:0051496^biological_process^positive regul…	MTLFVGGVAGMDVEDFPPPPPEMLADSVTFPEEDEGEPFDFDDDEVLEPPPASQNGSEDDSTAGPPAPSITPHTAPSPADGRVADSGGSSVGAAEETSAAGGNNEREKDLPPPPSPPPLLDDDLQTHPGTTDMESLNSSTKDLHSPQTTNGTSSQGKVNPYSVIDIAPIPLQNGSSSSTSSATTEPKEQEGEGHNSSPGITPGYSVPVPCGYATPSGVPLITPAYTTPVIIRHLSVDEDVTVLKTCNTSADSVFSEEYPPITEEDALAKWASDPANTAWMDSPDEVIYDDVPRENSDSNTDPDEMIYDDVEFGEEGGCSSSPDNGWSSSEFESYDETSDGEGGPENGLPNAFMRGKPPQRKNHLSQDLTRLKEHYEKKMKELMANTVGTVELQQLKQKH…	TCTGCTTACATCGAAGAGTGCAAAGTGAAAAGGCGCTGTGAAAAGTGGAATGGTCTCAGTGTAACGAGTTGTATTTCAGTCAGAAAAGTGAACCGACTTCTCTAAAAACGATATTATGGCGGGAAGATGAACTTTTCATCTGTGGAACAGTCATTAAATGACCCTGTTTGTTGGAGGAGTAGCCGGCATGGACGTGGAAGACTTTCCTCCCCCTCCTCCTGAAATGTTGGCTGACAGTGTCACATTTCCAGAGGAAGATGAAGGAGAGCCCTTCGACTTCGATGACGACGAGGTGCTCGAACCACCTCCAGCCTCTCAAAATGGGAGCGAGGACGATAGTACGGCCGGCCCCCCGGCACCTTCCATCACCCCTCACACAGCTCCATCACCAGCCGACGG…
A3KPR5	2.86312	2.09979	0.0448831	sp|A3KPR5|CYAC3_DANRE`A3KPR5`Q:1-246,H:1-247`66.4%ID`E:2e-89`RecName: Full=Cytochrome b ascorbate-dependent protein 3; EC=1.-.-.-;`Eukaryota; Metazoa; Chordata; Craniata; Vertebrata; Euteleostomi; Actinopterygii; Neopterygii; Teleostei; Ostariophysi; Cypriniformes; Cyprinidae; Danio.	GO:0016021^cellular_component^integral to membrane`GO:0031902^cellular_component^late endosome membrane`GO:0005765^cellular_component^lysosomal membrane`GO:0046872^molecular_function^metal ion binding`GO:0016491^molecular_function^oxidoreductase activity`GO:0022900^biological_process^electron transport chain	MRSMMIFYLFYFLCLCLSVACVVCVCVWNSQWRGGFAWDGSSREFNWHPVLMVTGLVVLYGNGAVLYRIPLTWAHSKLPWKILHAALMFLSLILSIVGLCAVFNVHNAGNIPNLYSLHSWIGIAATALFAFQWVAGFAGFLLPWTPLSMRKLLKPVHVWLGGSILILSIAASISGINEKLFFVLKGTTNGTQPYSSLPPEAVVANSLGVLIVAFGLIVLKILSTSEWQRPDGSEDRTYAPLLRDESD*	GGGGGGGGGGAAAGTATTTTTATTCACAGTGAAAACAAGTCATTTTAAATATATTAACATCTCACACAGACTTTTTACTTAAGACCACCAGCTGCTTGTAGGGTTAGAAAGGTGGATGACTTTTGGCGAGCAGCTGTTCTTCAATCACTTTCATCACGTAGTAAAGGCGCGTACGTCCTGTCCTCAGAGCCGTCTGGTCTCTGCCATTCACTGGTGGACAGAATCTTCAGGACGATCAAACCGAAGGCGACGATCAAAACCCCCAATGAGTTCGCCACCACAGCTTCAGGCGGCAGGCTGGAGTACGGCTGAGTCCCGTTGGTTGTTCCTTTTAGAACGAAGAAGAGTTTCTCGTTGATGCCAGAGATGCTGGCGGCGATGCTGAGTATCAGGATGCTT…
P22897	2.84457	0.83886	0.0353277	sp|P22897|MRC1_HUMAN`P22897`Q:1-101,H:912-1012`31.73%ID`E:5e-09`RecName: Full=Macrophage mannose receptor 1; Short=MMR; AltName: Full=C-type lectin domain family 13 member D; AltName: Full=C-type lectin domain family 13 member D-like; AltName: Full=Macrophage mannose receptor 1-like protein 1; AltName: CD_antigen=CD206; Flags: Precursor;`Eukaryota; Metazoa; Chordata; Craniata; Vertebrata; Euteleo…	GO:0010008^cellular_component^endosome membrane`GO:0005887^cellular_component^integral to plasma membrane`GO:0005537^molecular_function^mannose binding`GO:0004872^molecular_function^receptor activity`GO:0006898^biological_process^receptor-mediated endocytosis	MQCLETHSFVCEKPRPDISPPTKAPTPPPSQGCADGWTAKPHFRHCYKLFHKVDWSMKKSWGAALEDCISRGADLASIHNQEEEEFLSLYTKGTSKWIGLKHNP	ATGCAGTGCCTGGAGACGCACTCCTTTGTGTGTGAGAAGCCCAGACCGGACATCTCCCCACCCACTAAGGCGCCAACTCCACCGCCTTCACAGGGCTGCGCCGACGGCTGGACGGCCAAGCCGCACTTCAGACACTGCTACAAGCTCTTCCACAAAGTGGACTGGTCCATGAAGAAGAGCTGGGGGGCAGCATTGGAAGACTGCATCTCCAGAGGAGCCGATCTGGCGAGCATCCACAACCAGGAGGAGGAGGAGTTTCTGTCGCTGTACACAAAAGGCACCAGCAAGTGGATCGGTCTGAAGCACAACCCGA
Q02817	2.83986	1.03574	0.0458437	sp|Q02817|MUC2_HUMAN`Q02817`Q:2-132,H:4675-4800`48.48%ID`E:3e-29`RecName: Full=Mucin-2; Short=MUC-2; AltName: Full=Intestinal mucin-2; Flags: Precursor;`Eukaryota; Metazoa; Chordata; Craniata; Vertebrata; Euteleostomi; Mammalia; Eutheria; Euarchontoglires; Primates; Haplorrhini; Catarrhini; Hominidae; Homo.	GO:0005796^cellular_component^Golgi lumen`GO:0070702^cellular_component^inner mucus layer`GO:0070703^cellular_component^outer mucus layer`GO:0016266^biological_process^O-glycan processing`GO:0043687^biological_process^post-translational protein modification	EVPSVLPTNPPKPPPEPTPCNPDSICDLMKSSVFAECHPLVSPDNFYRGCVFDSCHVSNPAVECTSLQTYAAACAQAGVCLHWRNHTKLCDYSCPSDKIYKPCGPAEQPTCEDNLSEPSLNFTIEGCFCPDGM	GAAGTACCATCTGTGCTACCCACTAATCCACCCAAACCTCCACCTGAGCCAACTCCCTGCAACCCCGATTCTATATGTGATTTGATGAAAAGCAGTGTTTTTGCAGAGTGTCATCCTTTAGTGTCTCCTGACAACTTCTACAGAGGCTGTGTTTTTGACAGCTGCCACGTTTCCAACCCAGCAGTGGAGTGCACAAGTTTGCAAACTTATGCTGCTGCCTGTGCTCAAGCTGGTGTTTGCCTCCACTGGAGGAATCATACAAAACTTTGTGATTATAGCTGCCCCTCAGACAAGATTTATAAGCCTTGTGGTCCTGCAGAACAGCCAACTTGTGAAGACAATCTCAGTGAACCGAGCTTAAACTTCACCATTGAAGGATGCTTTTGCCCTGATGGAATG…
O14746	2.83131	2.31758	0.0181682	sp|O14746|TERT_HUMAN`O14746`Q:9-1052,H:10-1096`34.75%ID`E:3e-162`RecName: Full=Telomerase reverse transcriptase; EC=2.7.7.49; AltName: Full=HEST2; AltName: Full=Telomerase catalytic subunit; AltName: Full=Telomerase-associated protein 2; Short=TP2;`Eukaryota; Metazoa; Chordata; Craniata; Vertebrata; Euteleostomi; Mammalia; Eutheria; Euarchontoglires; Primates; Haplorrhini; Catarrhini; Hominidae; …	GO:0005737^cellular_component^cytoplasm`GO:0000783^cellular_component^nuclear telomere cap complex`GO:0005730^cellular_component^nucleolus`GO:0005654^cellular_component^nucleoplasm`GO:0016605^cellular_component^PML body`GO:0005697^cellular_component^telomerase holoenzyme complex`GO:0046872^molecular_function^metal ion binding`GO:0042803^molecular_function^protein homodimerization activity`GO:0042…	MTSEDVSRVLELLRSLYKRTQTLQEFADGVVFRDGRRATLLQPSDSIVFQTFVRAVFVCSDEELREVRSSKQICTFSELLAFVLNNLKRSKSNNVLAQGYNWKTAQENKDVNLFRFQGDLSQSANYIHSSEQWKKVMAHLGPDFLLHLLGSFSVFVVAPPSCVFQICGAPAYDRVSVTTASSRFLLKHPSRRHTSSRLGKNRCSVKFKMRDSAEDEEKRRKKRRVESTNSSRKRKREPEEEESSKRRCDTHHEESSQHACSEAVLVESTVSENDKSSLKMPPETSAASLPLEGEPSWRSGTFPPLPSSQCFIRTMGLLYGGQGMQGFCLNRKKQTAAGLRRLQGQDLVRLVFFQGLPYLDKQTRDPKKLRLRFFRMVPVFGELLQRHRKCPYTRVLQRM…	TGATGGCCTGCTTTCTGCATGAAAACCAATAAAATCTGAGCTCCTGACTCAAAGCTGCAGCTGTCCTGCCAGGGTCACAGAGGACAGGAGGCTGCTGCGATCTGACATCTTTTGGATGAAACCACCCCAGAGATCATATATTCAAGAAGGGGAGCTCAAGGCCTGATCAAACAAACTGACTCAAATAAATGATAGGACTGAGGAAGTCATCTTTGCAAGAGAACTGGGATTGTGCTGAGCCGTTTTACTAGTTGAGGATGGGTAAAAGTCAAGACTCACAGGTGGAGGAGAGACCCAAATGGGACAACAAGGTCCAATACCTGCTAACATGCATCGGTTTTGCAGTGGGGATTGGAAATGTGTGGCGTTTTCCCTACCTATGTCAGATCTATGGAGGAG…
Q9UBG0	2.8085	0.440356	0.0315095	sp|Q9UBG0|MRC2_HUMAN`Q9UBG0`Q:1-136,H:401-534`40.44%ID`E:2e-22`RecName: Full=C-type mannose receptor 2; AltName: Full=C-type lectin domain family 13 member E; AltName: Full=Endocytic receptor 180; AltName: Full=Macrophage mannose receptor 2; AltName: Full=Urokinase-type plasminogen activator receptor-associated protein; Short=UPAR-associated protein; Short=Urokinase receptor-associated protein; A…	GO:0016021^cellular_component^integral to membrane`GO:0030246^molecular_function^carbohydrate binding`GO:0006897^biological_process^endocytosis	RTWQDAQSKCRDLGAELVSIMSMKEQSWVESYLYMATNNLWTGLNDLLVPGMFTWSDDFEVTFTYWAPGEPNNHNGFSEDCVEMLYQSGRWNDKSCSELNNYICKKPKAHYPAPSVQPTQYGCPQGWDAYGYSCYW	AGAGGACATGGCAGGATGCTCAGAGTAAATGCAGAGATCTGGGTGCTGAACTTGTGTCCATCATGTCCATGAAGGAGCAGAGCTGGGTGGAAAGCTACTTGTACATGGCCACTAACAATCTGTGGACGGGTCTGAATGACCTCCTTGTGCCTGGTATGTTTACCTGGTCGGATGACTTTGAGGTGACCTTCACCTACTGGGCTCCAGGAGAACCCAACAACCATAACGGCTTCAGTGAGGACTGTGTGGAGATGCTATACCAGAGCGGCCGGTGGAATGATAAATCCTGCTCTGAACTCAACAACTACATCTGTAAAAAGCCTAAAGCTCACTACCCGGCGCCTTCTGTCCAGCCCACTCAGTATGGGTGTCCTCAGGGTTGGGATGCTTATGGATACT…
Q9TU53	2.79977	0.0357187	0.0144197	sp|Q9TU53|CUBN_CANFA`Q9TU53`Q:1-152,H:2794-2945`51.97%ID`E:2e-44`RecName: Full=Cubilin; Flags: Precursor;`Eukaryota; Metazoa; Chordata; Craniata; Vertebrata; Euteleostomi; Mammalia; Eutheria; Laurasiatheria; Carnivora; Caniformia; Canidae; Canis.	GO:0010008^cellular_component^endosome membrane`GO:0005765^cellular_component^lysosomal membrane`GO:0005509^molecular_function^calcium ion binding`GO:0031419^molecular_function^cobalamin binding`GO:0008203^biological_process^cholesterol metabolic process`GO:0015031^biological_process^protein transport	SWSIDSSGCGGIIHGDAGTIKSPNFPQNFPAHVECSWQIIAHEGNHLEMTFNPDFQIPDSSGTCQESYVKVWSGQTQTPEDLLASHCGSVAPGPIVAPYNVITTRFQSSGDTGKGFSYSFSTRCGANFSAPSGRVVSPNYPADYPDNSNCNY	GTGTAGTTACAGTTGGAGTTATCAGGGTAGTCTGCTGGATAATTTGGAGAAACCACACGCCCACTGGGAGCTGAGAAGTTTGCACCACACCTGGTGCTGAAGGAGTAGGAAAATCCTTTGCCGGTGTCTCCAGATGACTGGAATCGAGTTGTGATTACATTGTAGGGAGCCACAATGGGCCCTGGGGCCACAGAACCACAGTGAGATGCCAACAGATCCTCAGGAGTTTGGGTCTGGCCTGACCAAACCTTGACATAGCTTTCCTGGCATGTTCCACTACTGTCTGGAATCTGGAAATCAGGGTTGAACGTCATTTCCAAATGGTTGCCCTCATGGGCAATGATCTGCCAGGAGCACTCCACATGGGCTGGGAAGTTTTGGGGAAAGTTTGGTGACTTG…
P53670	2.79303	0.987603	0.0316294	sp|P53670|LIMK2_RAT`P53670`Q:2-604,H:27-630`70.35%ID`E:0`RecName: Full=LIM domain kinase 2; Short=LIMK-2; EC=2.7.11.1;`Eukaryota; Metazoa; Chordata; Craniata; Vertebrata; Euteleostomi; Mammalia; Eutheria; Euarchontoglires; Glires; Rodentia; Sciurognathi; Muroidea; Muridae; Murinae; Rattus.	GO:0005801^cellular_component^cis-Golgi network`GO:0005829^cellular_component^cytosol`GO:0005739^cellular_component^mitochondrion`GO:0005634^cellular_component^nucleus`GO:0005524^molecular_function^ATP binding`GO:0046872^molecular_function^metal ion binding`GO:0004674^molecular_function^protein serine/threonine kinase activity`GO:0008270^molecular_function^zinc ion binding`GO:0007286^biological_p…	MKVLQDTWHNACFQCSVCSDHLTNWYYENDGKLYCRKHYLEKFGEFCHGCSLLMTGPAMVAEEHKYHPECFVCLSCKVVIEDRDTYALVERSKLYCGRCYKQEVLKPMLEKHSQDSVIHSLPHTVTLISMPSAANGKRGFSVSVLRDVAGSANVQVKEVRGMLISPEVRNAIHVGDRILEINGLPVDTLMEQQVDNLIHCTSHTLQLLIEHDPVRLRLGSPRNQLGVPATSRMRLSSPSDAILERTDVADEGTLKRRSLRRSNSICKSPGPNSPKESPLIGKDIGRSESLRSPSSCSHRIFRPCDLIHDEVLGKGFFGQAIKVIHKATGEVMVMKELIRCDEETQKTFLKEVKVMRSLDHPHVLKFIGVLYKDKRLNLITEFIEGGTLKDVIRDKDPFP…	TTCGTGATTTCAAATGAAACTTTAATTGTTTTTTTTCAAAATTTGTGATATGGACAAAAACTTAAACATCAAAGGCCTTCTGTAAACTGATTGCTTATAAAACAAATGAAGTGTTCTTCTAATTTGGTAAAAAATAAAAAATAAAAATAAGGGGTTCCAAAAACATTCAGCAGTAATCCCAGAAAAAAACCAGTCTCAAGCAACTGCTTCACCGTCACGAAAACAAATCAAATAAAAAAATAAATAAAAATAGATCAACTAATTTTAATCAGGTAACACTACAGCAACATAAATAAAAGTGGTTACAACTAGTCATTTTCGCATTATTGTAGCAATATGCTGCAGAAATATCAAAATAAGAGTACAAACTCCCCATCTAAAAAACAAAAGGAACTTCTA…
Q8C6L5	2.79201	0.347612	0.0310863	sp|Q8C6L5|CGAS_MOUSE`Q8C6L5`Q:217-571,H:150-504`43.09%ID`E:2e-74`.`.	.	KLVTERAHSVLFIMSARRGSCKTRSPDSSEPATRTRQKQVPQPRSVAADKSNGTRRGANKQDQEKEKQSEKPCVEQREKTDKCFKERAGNSTEGTVASIAPTTTKSTKKSEKKTKKEDHNSVEGAVNSPESTTRVKTPEEAEQKTLKAKSKRKEETSSDMKEVSLEICTVESGKGNNERKAPKTKAERSNKEEPKEDPKRGKKTVAASEEDKVALILKETLNKIKLKMKEKVNVSKVINDIKKDIIKHLKEKTQLFKEVQEPLNTGSYYENTKISNPDEFDVMLPLLVERVHIKPFKEDGAFYKVALKRGNNPLKALQEEFLPANKILTEFRKEVTKFLKEFTGWEMTPIKPGCPAVTLTTKVESIEVSLDLVLCLQVKSSWPDFTKDGFKIEKWLGGK…	AAACTGGTGACTGAGCGCGCTCATTCAGTTCTGTTCATCATGAGTGCTAGACGTGGATCGTGTAAGACCAGGAGTCCTGACTCTTCAGAACCTGCGACGAGGACCCGGCAGAAGCAAGTACCTCAGCCAAGAAGCGTAGCAGCAGATAAGAGCAATGGAACCAGAAGAGGAGCAAACAAACAGGATCAGGAAAAAGAGAAGCAGAGTGAGAAGCCATGTGTGGAGCAGAGGGAAAAGACTGACAAATGCTTCAAAGAAAGGGCGGGAAACTCTACTGAAGGTACCGTGGCTTCAATTGCTCCAACCACAACTAAATCCACTAAAAAGTCTGAAAAGAAGACTAAGAAGGAGGACCATAACTCTGTTGAAGGTGCAGTGAATAGCCCAGAAAGTACTACT…
P98158	2.777	1.07309	0.0393588	sp|P98158|LRP2_RAT`P98158`Q:2-331,H:2565-2895`56.5%ID`E:4e-108`RecName: Full=Low-density lipoprotein receptor-related protein 2; Short=LRP-2; AltName: Full=Glycoprotein 330; Short=gp330; AltName: Full=Megalin; Flags: Precursor;`Eukaryota; Metazoa; Chordata; Craniata; Vertebrata; Euteleostomi; Mammalia; Eutheria; Euarchontoglires; Glires; Rodentia; Sciurognathi; Muroidea; Muridae; Murinae; Rattus.	GO:0016324^cellular_component^apical plasma membrane`GO:0031526^cellular_component^brush border membrane`GO:0005905^cellular_component^coated pit`GO:0030139^cellular_component^endocytic vesicle`GO:0005783^cellular_component^endoplasmic reticulum`GO:0005768^cellular_component^endosome`GO:0005615^cellular_component^extracellular space`GO:0005794^cellular_component^Golgi apparatus`GO:0016021^cellula…	RMLYWTDATLDKIERATLTGENRQVIIQGVIYPFALAVFQQDIFWTDWTERAVFRAGKEDGSSFATLAQDLQYRPNDIHVYAASKQENCSSFCQQFNGGCSHICVSGPVGPECQCPHEGDWYLANNGKDCIVDTGKRCKPEQFTCMNGNCISLRWKCDGHNDCQDNSDELERVCAFHTCSAFDFTCDNGRCIPLSYICDYTNDCGDNSDELSCPFPTCNPETEFTCANGRCISASFVCDGHNDCRDNTTSDEINCPDRICPTGQVKCENTNICIYPETMCDGYNNCGDNSDENPLFCAGRTCAPDKFQCDVGKCIPQAWICDSIKDCADGT	AGAATGCTCTACTGGACTGATGCAACACTAGACAAAATTGAACGCGCCACACTCACTGGCGAGAACCGGCAAGTGATCATACAGGGAGTCATCTACCCTTTTGCCTTGGCCGTCTTCCAGCAGGACATCTTCTGGACTGACTGGACTGAAAGAGCTGTTTTCAGGGCTGGAAAAGAAGATGGGTCTAGCTTTGCAACGTTAGCCCAGGACTTGCAGTATCGACCAAATGACATTCATGTTTATGCTGCATCCAAGCAAGAGAATTGCTCCAGCTTCTGCCAACAGTTCAATGGAGGTTGCAGTCATATCTGTGTATCTGGTCCAGTGGGCCCAGAATGTCAGTGTCCTCATGAGGGGGATTGGTACTTGGCTAATAATGGCAAAGACTGCATCGTAGAC…
O70244	2.77335	0.406477	0.00998787	sp|O70244|CUBN_RAT`O70244`Q:1-146,H:2945-3095`43.05%ID`E:3e-28`RecName: Full=Cubilin; AltName: Full=460 kDa receptor; AltName: Full=Glycoprotein 280; Short=gp280; AltName: Full=Intrinsic factor-cobalamin receptor; AltName: Full=Intrinsic factor-vitamin B12 receptor; Flags: Precursor;`Eukaryota; Metazoa; Chordata; Craniata; Vertebrata; Euteleostomi; Mammalia; Eutheria; Euarchontoglires; Glires; Ro…	GO:0016324^cellular_component^apical plasma membrane`GO:0031526^cellular_component^brush border membrane`GO:0005905^cellular_component^coated pit`GO:0030666^cellular_component^endocytic vesicle membrane`GO:0005783^cellular_component^endoplasmic reticulum`GO:0010008^cellular_component^endosome membrane`GO:0005794^cellular_component^Golgi apparatus`GO:0043202^cellular_component^lysosomal lumen`GO:0…	NCNYTIDAGEQTVIVLTFRVFQLEAHSTCLYDGLKIYNLPVSSAAVATLCGSSIPAPISTFGPMLVHFYSDSISTDTGFMAEYTAIPCGGFFNSTSGTVSSPALSIINYHHNTNCTFHIKVRADRVVNLRFNTFHLEASSSCRYDY	CAACTGTAACTACACGATAGATGCAGGAGAACAAACTGTGATCGTCCTCACTTTTCGGGTCTTCCAGCTGGAAGCACACTCCACCTGTTTGTATGATGGACTGAAGATCTACAACCTTCCTGTGAGCAGTGCTGCTGTTGCTACTCTATGTGGCTCGAGCATACCGGCTCCCATCTCCACCTTTGGTCCCATGCTTGTCCATTTCTACTCTGACTCTATTTCAACTGACACTGGCTTCATGGCAGAATATACAGCCATCCCTTGTGGTGGTTTTTTTAATAGCACCTCGGGTACAGTGAGCAGCCCAGCTTTGTCCATAATCAACTATCATCACAACACTAACTGTACCTTCCACATCAAGGTCCGGGCAGACAGAGTGGTGAATCTAAGGTTTAACAC…
Q8VIJ5	2.75939	3.74908	0.000903551	sp|Q8VIJ5|NCOAT_RAT`Q8VIJ5`Q:13-281,H:59-327`76.95%ID`E:7e-128`RecName: Full=Bifunctional protein NCOAT; AltName: Full=Meningioma-expressed antigen 5; AltName: Full=Nuclear cytoplasmic O-GlcNAcase and acetyltransferase; Includes: RecName: Full=Beta-hexosaminidase; EC=3.2.1.52; AltName: Full=Beta-N-acetylhexosaminidase; AltName: Full=Hexosaminidase C; AltName: Full=N-acetyl-beta-D-glucosaminidase;…	GO:0005737^cellular_component^cytoplasm`GO:0005634^cellular_component^nucleus`GO:0004563^molecular_function^beta-N-acetylhexosaminidase activity`GO:0004402^molecular_function^histone acetyltransferase activity`GO:0007568^biological_process^aging`GO:0046060^biological_process^dATP metabolic process`GO:0006044^biological_process^N-acetylglucosamine metabolic process`GO:0070265^biological_process^ne…	MSADGARAGGTPRFISGVVEGFYGRPWTMEQRTELFKREQQWGLNTYLYAPKDDYKHRMYWRELYSPEEADQLKALISAAKQHQVEFIYAISPGLDITFSNPKEVAALKRKLDQVKQFGCRSFSLLFDDIETEMCAADKKAFSSFADAQVSITNQVYEHLRSPETFLFCPTDYCAAFCTPTVSQSSYLQTVGEKLLPGIDILWTGPKVVSHTISVESIVEVTSVLKRAPVIWDNIHANDYDPQRLFLGPYKDRPTELISKLRGVLTNPNCEFYPNFVAIHT	GAGTGTGAATGGCCACAAAGTTGGGGTAAAACTCACAGTTGGGGTTGGTGAGGACTCCTCTCAGTTTGGAAATCAGCTCAGTGGGCCGATCCTTATAGGGTCCCAGGAAAAGCCTCTGTGGGTCGTAGTCGTTGGCGTGAATGTTGTCCCAGATGACTGGCGCCCTCTTCAGGACAGAGGTGACCTCTACTATGGACTCCACAGAGATCGTGTGGGACACCACCTTTGGACCCGTCCACAGGATGTCGATGCCGGGCAGCAGCTTCTCCCCCACAGTCTGCAGGTAGGAGGACTGGGACACGGTTGGGGTGCAGAACGCAGCGCAGTAGTCTGTGGGGCAGAACAGGAAGGTCTCGGGACTTCTCAGGTGCTCGTACACCTGGTTGGTGATGGACACCT…
Q0V9J0	2.75072	0.0679481	0.0440258	sp|Q0V9J0|TMM69_XENTR`Q0V9J0`Q:89-235,H:92-238`70.75%ID`E:1e-53`RecName: Full=Transmembrane protein 69;`Eukaryota; Metazoa; Chordata; Craniata; Vertebrata; Euteleostomi; Amphibia; Batrachia; Anura; Pipoidea; Pipidae; Xenopodinae; Xenopus; Silurana.	GO:0016021^cellular_component^integral to membrane	MIRILSGRWVTYGVPVWRHFSQTLKVPSYTAKPQLQFNFPGSSVLIAGRAASTNRLLSIKPVTWHASRLCQNDSGAASSQGRSKSQDSFSMKALTQAPKPALYLGFSGLIPFLSAPLVMAATQSFYPEVAFAQMVYGASIVSFLGGARWGFAIPPGSPAQPDWMNLGNSVVPSLVAWLALLCKDNFTEGALLVIMGLGLSLHYDLTLLPGYPAWFKAMRTVLTLVATFSIVASLVLKHFCTEKKIEEVWK*	GGTCAGATTCCACTTTTCTGGAAGTTTTTACAAGCTTTTAATTGAATGAAAATCGTTGGGAATATTACATTTTTAAACTGAGCTTAGGTTGCATCTGTTGTGCTTTCTTTTCTCGAGGGCTGATAAAGGAGTGGTGTAAAATTCCACCTCTCCAATGACATATTTAGGTTTACCCAGAACAGAATAACTGGAAATAAAACAAAGTGTTTAATTAGAGGGACAACAGGTTGATTTCAGTCAAACTTAGGTGTAAAAATACAGGATTTATTTAAATGCTTCAAAAATACTTGCATTTATAACAGTTTACATTGTAAATTTATTTCACAGACTAAACATTGAATCGGTAGTTCCAATTTAAATGTACTTTTTGTAGCATTTTTTACAAAAACTTTCTCGCAC…
O95294	2.74138	0.58723	0.009994	sp|O95294|RASL1_HUMAN`O95294`Q:1-540,H:277-804`60.93%ID`E:0`RecName: Full=RasGAP-activating-like protein 1;`Eukaryota; Metazoa; Chordata; Craniata; Vertebrata; Euteleostomi; Mammalia; Eutheria; Euarchontoglires; Primates; Haplorrhini; Catarrhini; Hominidae; Homo.	GO:0005737^cellular_component^cytoplasm`GO:0031235^cellular_component^intrinsic to internal side of plasma membrane`GO:0046872^molecular_function^metal ion binding`GO:0005543^molecular_function^phospholipid binding`GO:0005099^molecular_function^Ras GTPase activator activity`GO:0035556^biological_process^intracellular signal transduction`GO:0046580^biological_process^negative regulation of Ras pro…	SVISPAEVEDSSALTMLEEVTTVESRQDVAMTLVKIYLGQGLVVPFLDYLNTREVNHTTDPNTLFRSNSLASKAMEQFMKAVGMLYLHEVLKPIINRIFDERKYIELDPCKIDLNRSRRISFKGAVSEAEVRDNSAEMLQGYLTSIIESIVSSVDQCPSVMRVAFKQLHKRVEEQFTEPENEDVKYLAISGFFFLRFFAPAILTPKLFHLRDQHADTRTSRTLLLLAKALQSVGNLGLQLGHGKEQWMAPLHPIILRSVACVKDFLDKLIDIDHDTVSEVPQRAILLPSVIVKEGYLHKHKAEGTQLLSRFAFKKRYFWLTSETLSYAKTSEWQVRSSIPVRCLCAVERVDENAFQQQNVMQVISQNNDGQLQTMYIQCKNVNELNQWLSAIRKASIYN…	CACCTGGAATAAATCATTGTTATAAATTTGATATAAATAGGCAGGAAGGGGGCTGTTATCGTATAACGGGATAAAAACAATTAAAAGTTTCAAGTAAATATTAAGCCTGCAAACACACACAACATATTGCAATGAAATAATTGGTCACTGAGATTAGTGAGAAGAAGGTCAATTGAAAAATAGTTGATGATTAACCCACTTTATAGTGTTTTTTGTTTAGTTTGGTCCTCTTTAGGGGAGGAACAGAATTTCTGTAGTGCTCAAATAAAATGTAAGAAGGTTTCCTATTTTAATTTGAGTGGCCTAATTCAGGAAAGGCCAGGAGGTGCAAATTTCACCAAAGAGTTTCCCTGAAAAAAAATCCCAGAATTGTGCAAGTTCACATTCAGGGCCTTTTTT…
Q9NQB0	2.72979	0.0382432	0.0128858	sp|Q9NQB0|TF7L2_HUMAN`Q9NQB0`Q:1-421,H:107-545`82.43%ID`E:0`RecName: Full=Transcription factor 7-like 2; AltName: Full=HMG box transcription factor 4; AltName: Full=T-cell-specific transcription factor 4; Short=T-cell factor 4; Short=TCF-4; Short=hTCF-4;`Eukaryota; Metazoa; Chordata; Craniata; Vertebrata; Euteleostomi; Mammalia; Eutheria; Euarchontoglires; Primates; Haplorrhini; Catarrhini; Homin…	GO:0070369^cellular_component^beta-catenin-TCF7L2 complex`GO:0000790^cellular_component^nuclear chromatin`GO:0016605^cellular_component^PML body`GO:0032993^cellular_component^protein-DNA complex`GO:0005667^cellular_component^transcription factor complex`GO:0008013^molecular_function^beta-catenin binding`GO:0003682^molecular_function^chromatin binding`GO:0000978^molecular_function^RNA polymerase I…	MIPDLTSPYLPNGSLSPTARTYLQMKWPLLDVQPGGLQSRQALKDARSPSPAHIVSNKVPVVQHPHHVHPLTPLITYSNEHFTPGNPPPHLQTDVDPKTGIPRPPHPPDISPYYPLSPGTVGQIPHPLGWLVPQQGQPVYPITTGGFRHPYPTALTVNASMSRFPPHMVPPHHSLHTTGIPHPAIVTPNVKQESSHSDISSLNSSKQSDAKKEEEKKKQVHIKKPLNAFMLYMKEMRAKVVAECTLKESAAINQILGRRWHALSREEQAKYYELARKERQLHMQLYPGWSARDNYGKRKKRKREKQQAESNEHREYFPNPCLSLPPITDANTPKKCRALFGLDQLSLWCKPCRRKKKCIRYIQGEGSCASPPSTDGSLLDSPPSSPSSVVPSPSSKESK…	GCGGGTGGTGGAGTGGCTGGTGGGCCGGTTTCATAGTCAGTGAGAGAGGTTGCATTTGTTCAGTCTGAGGTTTGGACTCTTTTGAGGAGGGGGAGGGAACCACTGAGGAAGGAGAGGATGGGGGGGAGTCTAGTAAGCTTCCGTCCGTAGAGGGAGGACTGGCACAGCTGCCTTCACCTTGGATGTAGCGAATGCACTTTTTTTTTCTCCTGCATGGTTTGCACCATAAACTCAGCTGGTCAAGCCCGAACAAGGCACGACACTTCTTTGGGGTATTTGCATCTGTAATCGGAGGAAGTGAAAGGCAAGGGTTTGGAAAATATTCTCTGTGTTCATTGCTCTCTGCTTGCTGCTTTTCCCTTTTTCTCTTCTTCCTTTTCCCATAGTTGTCTCGTGCTG…
O55012	2.7229	4.15586	0.0271504	sp|O55012|PICA_RAT`O55012`Q:1-579,H:1-640`61.8%ID`E:0`RecName: Full=Phosphatidylinositol-binding clathrin assembly protein; AltName: Full=Clathrin assembly lymphoid myeloid leukemia protein; Short=rCALM;`Eukaryota; Metazoa; Chordata; Craniata; Vertebrata; Euteleostomi; Mammalia; Eutheria; Euarchontoglires; Glires; Rodentia; Sciurognathi; Muroidea; Muridae; Murinae; Rattus.	GO:0030118^cellular_component^clathrin coat`GO:0005905^cellular_component^coated pit`GO:0005768^cellular_component^endosome`GO:0005794^cellular_component^Golgi apparatus`GO:0005886^cellular_component^plasma membrane`GO:0014069^cellular_component^postsynaptic density`GO:0045211^cellular_component^postsynaptic membrane`GO:0042734^cellular_component^presynaptic membrane`GO:0008021^cellular_component…	MSGQSITDRITAAQHSMTGSAISKAVCKATTHEISGPKKKHLDYLIHCTNEMNVNIPQLADTLFERTANSSWVVVFKALITTHHLMMYGNERFIQYLASRNTLFNLNNFLDKGALQGYDMSTFIRRYSRYLNEKAMSYRLVAVDFTKMKRGIDGVMRTMNTEKLIKTLPIIQNQLDALLDFQANPNELTNGVINSAFMLLFKDSIRLFAAYNEGVINLLEKYFDMKKNQCKDALDIYKKFLYRMTKLSEFLKVAEQVGIDQGDIPDLSQAPSSLLEALEQHLASLEGKKTKEMNADTRASTLSSAVSSLSSTGMSFSRMDEKEKQQALEEEQARLQALKDQRLKEISMQTPPAASPVSQSAGSASNNNHITQTPELFSSTLPANSLNSDLFDLQPAFIP…	GACCAGGAGAGAGAAAACAATTTTTATCCATAATAAACAAATATACTGCTGTAAAATAAAAGCCTGTAACTTCTGTCAGCTGTAACATTTGTTTGCCTTTCCATGCTTGATACAATCCATATATTTTCTGCATTAAATAAATAGAAAAAAATGTACAAAGAGAGACAGAAGAGAAAGACAGATCAACAGGTGGGGGGGGTTCTGCTTTGAAAACATTTGGCATCACACGACGGATCCGGATGTATGAATCTGCATTAACCCGCTGACCCCCCCGTAACCTACACACTGCTATGCTAACATATCGTCCAGAAGAAATGGAAAGAAATTGAAAGAAAGCAGCATTTGTTTTGAAGCCGTGTTGCACGTGGATTTCTTTATATACAGAAAAACGAGGCAGCA…
O42154	2.72207	0.788225	0.0260973	sp|O42154|G6PC_HAPXE`O42154`Q:1-177,H:5-176`62.71%ID`E:7e-63`RecName: Full=Glucose-6-phosphatase; Short=G-6-Pase; Short=G6Pase; EC=3.1.3.9; Flags: Fragment;`Eukaryota; Metazoa; Chordata; Craniata; Vertebrata; Euteleostomi; Actinopterygii; Neopterygii; Teleostei; Euteleostei; Neoteleostei; Acanthomorpha; Acanthopterygii; Percomorpha; Perciformes; Labroidei; Cichlidae; African cichlids; Pseudocreni…	GO:0005789^cellular_component^endoplasmic reticulum membrane`GO:0016021^cellular_component^integral to membrane`GO:0004346^molecular_function^glucose-6-phosphatase activity`GO:0006094^biological_process^gluconeogenesis	PYWWVHETAHYTDDARPHIEQYPMTCETGPGSPSGHAMGAAGVYYTLVTSILAILSSTTQQNSKPSSNKHWYLKVGLWSLFWGVQVCVCLSRVFIAAHFPHQVVAGVITGMIVAEAFNRTQWIYSASMKKYFYTTLFLTSFAVGFYLLLKALGVDLLWTLDKAQKWCVRPEWVHLDTT	GGCGTGGTGTCCAGATGGACCCACTCGGGCCTGACGCACCACTTCTGGGCTTTGTCCAGGGTCCACAGCAGGTCCACACCCAGAGCTTTGAGCAGGAGGTAGAAGCCAACGGCGAAGGAGGTGAGGAAGAGCGTGGTGTAGAAGTATTTCTTCATGCTGGCGCTGTAGATCCACTGGGTTCTGTTGAAGGCCTCGGCCACAATCATGCCTGTGATGACGCCAGCGACAACCTGGTGAGGGAAGTGAGCCGCGATGAAGACCCGCGAGAGGCAGACGCACACCTGGACGCCCCAAAACAAGGACCAGAGGCCGACCTTCAGGTACCAGTGTTTGTTTGAGGACGGCTTGCTGTTCTGTTGAGTCGTGCTGCTGAGGATGGCGAGGATGGAGGTCACCAGG…
P79385	2.71342	1.43597	0.0329986	sp|P79385|MFGM_PIG`P79385`Q:3-152,H:244-409`36.75%ID`E:8e-25`RecName: Full=Lactadherin; AltName: Full=MFGM; AltName: Full=Milk fat globule-EGF factor 8; Short=MFG-E8; AltName: Full=SED1; AltName: Full=Sperm surface protein SP47; Short=PP47;`Eukaryota; Metazoa; Chordata; Craniata; Vertebrata; Euteleostomi; Mammalia; Eutheria; Laurasiatheria; Cetartiodactyla; Suina; Suidae; Sus.	GO:0002080^cellular_component^acrosomal membrane`GO:0005576^cellular_component^extracellular region`GO:0001525^biological_process^angiogenesis`GO:0007155^biological_process^cell adhesion`GO:0007338^biological_process^single fertilization	EIVYSCEQKVCLHGLGVEDGSIPDEQLSASSSIGSYTPSKARLNGDFCWKPSGSATSSWIQVNLGQTRKVTGIVIQGCSDGENWITKYKLQHSTDGISWKDYTADGDFFLGSVDKNTPETQLLGTPVSTQFIRIIPLEFKNQAGLRFEVLGCTPDYAITCADKPNFSSAL	CGAGATCGTCTATAGTTGTGAGCAGAAAGTGTGTCTGCATGGTCTGGGCGTGGAAGACGGAAGCATCCCCGACGAACAGCTCTCTGCGTCCTCCTCCATCGGGTCTTACACTCCCAGCAAGGCTCGGCTGAATGGAGATTTTTGCTGGAAGCCTTCAGGAAGTGCAACCTCAAGCTGGATTCAAGTGAACCTGGGTCAGACCAGGAAAGTAACAGGGATTGTAATCCAGGGTTGTTCTGATGGTGAAAACTGGATTACTAAATATAAACTCCAACACAGCACAGATGGGATAAGTTGGAAAGACTACACAGCTGACGGGGATTTTTTCCTGGGTTCAGTGGACAAAAACACCCCAGAGACCCAGCTGCTCGGCACGCCAGTGTCCACCCAGTTCATCCG…
O42364	2.6933	0.712264	0.0265242	sp|O42364|APOEB_DANRE`O42364`Q:15-103,H:1-91`37.36%ID`E:8e-11`RecName: Full=Apolipoprotein Eb; Short=Apo-Eb; Flags: Precursor;`Eukaryota; Metazoa; Chordata; Craniata; Vertebrata; Euteleostomi; Actinopterygii; Neopterygii; Teleostei; Ostariophysi; Cypriniformes; Cyprinidae; Danio.	GO:0005576^cellular_component^extracellular region`GO:0008289^molecular_function^lipid binding`GO:0006869^biological_process^lipid transport`GO:0042157^biological_process^lipoprotein metabolic process	VDLQTHLQSKGVGVMKVLAVLVLAVFTGCNANLFYADAPKPQLEVLTDAFWDYVSKATQTADDTLEMIKKTQFGQEVSARLTESATLANEYATSIHEQLPPEAKQLITKVTTE	AAGTGGATTTACAGACACACTTGCAGTCCAAGGGTGTAGGAGTCATGAAGGTCCTTGCTGTGCTTGTCCTTGCCGTTTTTACTGGCTGCAATGCCAACCTCTTCTATGCTGATGCCCCAAAGCCTCAGCTGGAAGTGCTGACTGATGCTTTCTGGGACTATGTTAGCAAAGCCACCCAGACTGCTGATGACACACTGGAGATGATCAAGAAGACCCAGTTTGGGCAGGAAGTCAGTGCCCGATTGACAGAAAGTGCAACCCTGGCAAACGAATATGCAACCTCCATTCACGAGCAGCTTCCCCCTGAAGCCAAGCAGCTGATCACCAAGGTCACCACCGAG
Q86U86	2.68358	0.450543	0.00991211	sp|Q86U86|PB1_HUMAN`Q86U86`Q:5-497,H:3-527`64.03%ID`E:0`RecName: Full=Protein polybromo-1; Short=hPB1; AltName: Full=BRG1-associated factor 180; Short=BAF180; AltName: Full=Polybromo-1D;`Eukaryota; Metazoa; Chordata; Craniata; Vertebrata; Euteleostomi; Mammalia; Eutheria; Euarchontoglires; Primates; Haplorrhini; Catarrhini; Hominidae; Homo.	GO:0000776^cellular_component^kinetochore`GO:0000228^cellular_component^nuclear chromosome`GO:0003682^molecular_function^chromatin binding`GO:0003677^molecular_function^DNA binding`GO:0006338^biological_process^chromatin remodeling`GO:0007507^biological_process^heart development`GO:0007067^biological_process^mitosis`GO:0008285^biological_process^negative regulation of cell proliferation`GO:000189…	MSASSKRRRATSPSSSVSGGADFDDGSSSTPGSGRKRKRTSNIPPVDTIAVCHELFNAVRDYKDDQGRQLCEVFLRVPKRRNQPDYYEAVSQPIDMTKIQYKLKSEEYNDVEQLTADFQLMFNNARSFYKRDSEEYQTACKLWEVYLQSRNEFVQPGDGDEDDEDGDDMGDNPGLSAEEETSGSNLKEVLEQLLEAIVSQADTSGRLVSELFQKLPSKVQYPDYYAIIKEPIDLRMIAQRIQIGHYKTVSAMAKDIDLMTKNAKTYNEPGSQIFKDANTIKKVFIQRKTELEHAEPTKSSLRIRNRRSGQGDRLSGVSVALQYGSESEDDPVLSGSVCYDEEESEAESQSSSMEMSNPIFQLYEAVRGARNSQGQVFAEPFQQLPSRREYPDYFQQIKQ…	GCAGCGTACAAGGCCTTCATTCGGTTCTTTTTGACATTTTTTTTGTGGCTTTTCTTTTTGATGCTTCCTGTATCAGACGACAAAATGCTGTCTCCATCTTCATCGTCTCTCCTCAGGAGTTCCTTCTTTTTAGCCTGCATGATCTGCTGGAGCCTGAAAGCTCGTTTGTAAATGCTCGAGTTGGGCATGTTGTATCGCTTTGCATTTTCAAACATCAAAGTGAGGTCCGCCTCGATCTGCTCTACGCTCTCATACTCGCCGCTCTTCATCTTCGCCCTGATTTGCTGCAGACAAATGGGTTGTTTGATCTGCTGAAAGTAATCCGGATACTCTCTGCGAGACGGCAGCTGCTGAAAGGGTTCGGCGAACACCTGGCCCTGGCTGTTCCTGGCCCCCCTC…
P09848	2.68004	2.6543	0.0451826	sp|P09848|LPH_HUMAN`P09848`Q:1-343,H:1579-1916`53.04%ID`E:2e-104`RecName: Full=Lactase-phlorizin hydrolase; AltName: Full=Lactase-glycosylceramidase; Includes: RecName: Full=Lactase; EC=3.2.1.108; Includes: RecName: Full=Phlorizin hydrolase; EC=3.2.1.62; Flags: Precursor;`Eukaryota; Metazoa; Chordata; Craniata; Vertebrata; Euteleostomi; Mammalia; Eutheria; Euarchontoglires; Primates; Haplorrhini;…	GO:0016324^cellular_component^apical plasma membrane`GO:0005903^cellular_component^brush border`GO:0005887^cellular_component^integral to plasma membrane`GO:0043169^molecular_function^cation binding`GO:0017042^molecular_function^glycosylceramidase activity`GO:0000016^molecular_function^lactase activity`GO:0016740^molecular_function^transferase activity`GO:0005975^biological_process^carbohydrate m…	WHVYNDKYRAEQKGRISITLNSDWAEPRNPYKQEDIDAAKRYMDFFLGWFANPIFVGDYNEPMKRIIRERSLANGLDKSRLPEFTPAEIERIRGTHDFFGLNHYTSVLAFSVDYGETLNYDADRGTVVISDRTWLESGSNWLKIAPLGFRKLLKYIKDEYGDPPILVTENGVSENGPVDLNDEHRSYFYENYINEMLKANMTDGANVIGYTAWSLMDNLEWASGYGERFGLFYVNHTNADRPRTPKTSVPFYTTIVRCNGFPNPADGPHDCTNPLFSTSGPISDVTTEPVQGNIVKFLGMELSIDEAVTGLNTTFALLIVSVVAVVGVTALLIVSKKRSKKRRDD*	AGCATGTCAAGAAATATTTTATTGGATTAGATACAACACATTTTACATGGCAACATTCTATACAATGGCATATCAAGTAAACAGAAAAACACAAGATTCAAACAGGACTTAATCCAAATATATACATCATCATTACAAAATAGTAAATAATACAACTTTGGTGTCACAAAATATTTTGTTACTGACTTTAAAATGGCAAATGTTTCACAACAACAACATAAAACGTGTCAATTAAAGCCGCAAAAAAGAAGAAAAAGGCACTAATTGGAAATTCTATCAATGTGAAAAGATGTTAAAATAAAATTTTACGTTTAAGATGCGTTTGAATAGTTCTTGGTTTCTATTATGAAAGTGGGCAGAAATTCCAGTAAACCTTGCAAAAGATGAATTTGCAATTAC…
P48833	2.67143	9.20911	0.0499789	sp|P48833|ZP3_RABIT`P48833`Q:31-255,H:166-376`24.27%ID`E:5e-12`RecName: Full=Zona pellucida sperm-binding protein 3; AltName: Full=Sperm receptor; AltName: Full=Zona pellucida glycoprotein 3; Short=Zp-3; AltName: Full=Zona pellucida protein C; Contains: RecName: Full=Processed zona pellucida sperm-binding protein 3; Flags: Precursor; Fragment;`Eukaryota; Metazoa; Chordata; Craniata; Vertebrata; E…	GO:0005783^cellular_component^endoplasmic reticulum`GO:0031012^cellular_component^extracellular matrix`GO:0005615^cellular_component^extracellular space`GO:0005794^cellular_component^Golgi apparatus`GO:0016021^cellular_component^integral to membrane`GO:0005771^cellular_component^multivesicular body`GO:0002081^cellular_component^outer acrosomal membrane`GO:0048471^cellular_component^perinuclear re…	APLTVHVSCFPRRFYSEPSVTLAPPVPMKNFNIQVMDSSWAKPVESNSYKRGQVMNLQVSAETRPNQQLFIHSCFSSASPEPQTKPRHAVILNKGCSSSLGSPHPVAWFTGSNAANVVNFALNTSHLTSELYIHCSAIISDQGVTSISKSCNYDAPQSKWVELNGDVDVCACCSSKCKSSSVKIHSGNKEIVSTGLILVDDDVKTNAPMDSEPQASSTLLARSNSPVEADSTVSDSLFLQRELPSSQQGVVVVSQDPTSRLTLWLPGQADAEYGKDMTTWSEDGFSVRLSPNGNYLDMKPPTASPMLPSQSEDADPTMRGSQGGKSWDMNIHTMDVWPIPRPETTEGLQEGFEKSTSSEVKTDLPNEISINLLLLEHPKTIPKILEDVAEEPLKKQLPD…	GCTCCCCTCACAGTCCATGTCTCCTGCTTCCCCAGAAGGTTTTATAGTGAACCAAGTGTTACCCTAGCACCACCTGTTCCTATGAAGAACTTCAACATTCAAGTCATGGATTCATCTTGGGCTAAACCAGTGGAGTCAAACTCTTACAAAAGAGGCCAGGTCATGAACCTCCAAGTATCTGCAGAAACGAGGCCCAATCAGCAACTCTTCATCCACTCCTGCTTCTCGTCTGCATCCCCTGAGCCCCAGACAAAACCCAGACATGCTGTCATATTGAACAAAGGGTGCTCATCCTCATTGGGTTCTCCGCACCCTGTTGCATGGTTTACAGGTTCTAACGCAGCAAATGTGGTCAACTTTGCACTCAATACGTCTCATCTTACTTCAGAGCTGTACATC…
P15979	2.66945	0.869688	0.0430405	sp|P15979|HA1F_CHICK`P15979`Q:19-308,H:23-299`33.56%ID`E:3e-43`RecName: Full=Class I histocompatibility antigen, F10 alpha chain; AltName: Full=B-F histocompatibility F10 antigen; AltName: Full=B-F-beta-IV; AltName: Full=B12; Flags: Precursor;`Eukaryota; Metazoa; Chordata; Craniata; Vertebrata; Euteleostomi; Archosauria; Dinosauria; Saurischia; Theropoda; Coelurosauria; Aves; Neognathae; Gallifor…	GO:0016021^cellular_component^integral to membrane`GO:0042612^cellular_component^MHC class I protein complex`GO:0002474^biological_process^antigen processing and presentation of peptide antigen via MHC class I`GO:0006955^biological_process^immune response	MNILQLCALFGTLITINGEKHSLTYIYTAFSKPVKLPGIHEFTAMGLLDNRMIDYYDSTVQKKIPKQKWMEEQLQQEYWDKGTQSRQSKQQWFKVNIDILINRMRQTSNETHVLQWMHGCTAKEDENGNLTFVRGVDKYNYDGDDFLSFDDGHQVWVAAADEAVPTKRKWDEVTALKDYTKGYLEKECMEWMKKFLEYSKSQLGNASRPDVFVFATRAKEKTNAVLTCLATGFDTKDVILNIKRNSRILTADDGVKSSRVRPNDDNTFQRRDYVEFLRTDSASYSCEVVHQASNMRVVKAWDNRLPPLEEMSIALYVLPLVLVLVLVVLVTAAVLIFLQKRGKLNFKRPSPSINGSSDSSSNSSSNGSSNGSSDSTPNSSEPLMNGSSNGSSNGSSNDS…	TTCCTTTCCGGTTTGAGGAAGACGCTTTTTGCATCTGTCGCGTGGGAAGGAAAGACCGAATATTTTGAAACTAAAGCCCGAATTCGACCCAAATAGCATGTAAAAATGAACATTTTACAATTGTGCGCGCTTTTTGGGACACTAATAACCATAAACGGTGAGAAACACTCCCTGACCTACATCTACACGGCCTTCTCCAAACCTGTGAAGCTCCCAGGCATCCATGAATTCACTGCTATGGGTCTGCTGGACAACAGAATGATCGACTACTATGACAGCACTGTGCAAAAGAAAATTCCCAAACAGAAGTGGATGGAGGAGCAACTCCAGCAGGAATACTGGGATAAAGGAACTCAGTCCCGGCAGAGCAAGCAGCAGTGGTTCAAGGTTAACATCGAC…
Q63244	2.63741	0.371322	0.041704	sp|Q63244|FOXQ1_RAT`Q63244`Q:1-150,H:1-199`54.27%ID`E:5e-49`RecName: Full=Forkhead box protein Q1; AltName: Full=HNF-3/forkhead-like protein 1; Short=HFH-1; AltName: Full=Hepatocyte nuclear factor 3 forkhead homolog 1;`Eukaryota; Metazoa; Chordata; Craniata; Vertebrata; Euteleostomi; Mammalia; Eutheria; Euarchontoglires; Glires; Rodentia; Sciurognathi; Muroidea; Muridae; Murinae; Rattus.	GO:0005667^cellular_component^transcription factor complex`GO:0043028^molecular_function^cysteine-type endopeptidase regulator activity involved in apoptotic process`GO:0008301^molecular_function^DNA binding, bending`GO:0003690^molecular_function^double-stranded DNA binding`GO:0030331^molecular_function^estrogen receptor binding`GO:0003705^molecular_function^RNA polymerase II distal enhancer sequ…	MKLEVLCGNYYDAKHLEMSCEAEGAAARSPVCAEEELGSDGDVAHSPSPVTPCGNSKTKPYTRRPKPPLSYIALIAMAIRDSPSGRLTLADINDYLMKKFPFFRGSYTGWKNSVRHNLSLNDCFLKVLRDPSRPWGKDNYWMLNPQSEYT	GAGACTTTTACGCACAGAGTTGAAGACTGAACAGCGCAGCGAGGATGAAGCTGGAGGTGTTGTGTGGAAACTATTATGATGCCAAACACCTGGAGATGTCTTGTGAGGCGGAGGGGGCTGCGGCGCGATCTCCTGTCTGCGCGGAGGAGGAGCTGGGATCCGATGGAGACGTGGCCCACAGCCCCTCACCTGTCACTCCGTGTGGGAACAGCAAGACCAAGCCGTACACGCGGAGACCCAAACCTCCTCTTTCATACATCGCACTGATCGCCATGGCCATCCGGGACTCCCCCTCTGGACGTCTGACCCTGGCGGACATAAACGACTATCTGATGAAGAAGTTCCCGTTCTTCAGGGGGAGCTACACCGGCTGGAAGAACTCTGTCCGACACAACCTGT…
P12958	2.56912	1.43828	0.0352407	sp|P12958|EPD2_CARAU`P12958`Q:5-209,H:4-213`29.38%ID`E:6e-24`RecName: Full=Ependymin-2; AltName: Full=Ependymin II; Short=EPD-II; Flags: Precursor;`Eukaryota; Metazoa; Chordata; Craniata; Vertebrata; Euteleostomi; Actinopterygii; Neopterygii; Teleostei; Ostariophysi; Cypriniformes; Cyprinidae; Carassius.	GO:0005576^cellular_component^extracellular region`GO:0005509^molecular_function^calcium ion binding`GO:0007160^biological_process^cell-matrix adhesion	MKVAVVLACLVVSCLAEKPRPCTSPPLLTGELSVYSQDERIGILGKYLYDALGQRVRLFEIGTYENRSFTADVLLHFREAALYVIDDNKRTCSKSPLKADFQPLRIPQNATLLGQAVVGSSSAPGQGLLVNTWVGDLPDKSGQFMSVITEFGCIPVTTNYKTKEFGWVGTNYFNNVIGITNPDLLEPPTFCADAVMDVEAEPRDYLGLLVKKN*	AACAAGTTGTTTTTCTTCAGTTGGATGAATCAAACCCAGAACTGGGGTTTCCTGAATGTGGAAATCGTGTCAGTCACATGATCAGAGGAGGGGAAACCCTGAAACATGAAGGTGGCAGTGGTGTTGGCGTGCTTGGTGGTCAGCTGTCTGGCAGAGAAGCCTCGTCCCTGCACGAGCCCGCCTCTTTTGACCGGAGAGCTCTCTGTGTACTCCCAGGATGAGAGAATTGGAATACTCGGCAAATATCTGTACGATGCTCTGGGACAGCGAGTGAGGCTGTTTGAGATAGGCACCTATGAGAACCGGTCGTTCACCGCAGATGTCCTGCTGCACTTCAGAGAGGCGGCCCTCTATGTCATTGATGACAACAAGCGCACATGCAGCAAGAGCCCACTGAAG…
Q15262	2.56789	1.56628	0.0151176	sp|Q15262|PTPRK_HUMAN`Q15262`Q:19-1433,H:25-1439`82.84%ID`E:0`RecName: Full=Receptor-type tyrosine-protein phosphatase kappa; Short=Protein-tyrosine phosphatase kappa; Short=R-PTP-kappa; EC=3.1.3.48; Flags: Precursor;`Eukaryota; Metazoa; Chordata; Craniata; Vertebrata; Euteleostomi; Mammalia; Eutheria; Euarchontoglires; Primates; Haplorrhini; Catarrhini; Hominidae; Homo.	GO:0005912^cellular_component^adherens junction`GO:0030424^cellular_component^axon`GO:0009986^cellular_component^cell surface`GO:0005911^cellular_component^cell-cell junction`GO:0030425^cellular_component^dendrite`GO:0005887^cellular_component^integral to plasma membrane`GO:0031256^cellular_component^leading edge membrane`GO:0043025^cellular_component^neuronal cell body`GO:0001750^cellular_compon…	MDSLLSVFLGLLFLFSSAGRVSGQLPTGSCTFDEGFSQCDYQQDPHDDFDWTHINTQEVPYISPDLPKGSYMYVDVSQHDVGQKAKFQLPVMKENDTHCIDFNYLLTSADGSSPGTLNVLVKVNKGPLANPIWNVTTYTGKDWLKAELAVSTFWPNEYQVIFEAEVSDGKTGFIAIDDIQVLSYPCDKSPHFLRLGDVEVNAGQNATFQCIATGRDTSSNKLWLQRRNGEDIPVALTKAINHRRFAASFHLKEVNGQDQDLYRCVTQSERGSGVSNFAGLIVKEPPHPIAPPQLLGVGPTYLLIQLNANSIFGDGPIILKEVEYRMTSGSWTETHAVNSPNYKLWHLDPDTEYEIRVLLTRPGEGGTGKPGPPLITRTKCAEPMRTPKRLKIAETRSRL…	AAACTAGTATTTTTTTTTTTACTGGTGAACCTGAGATTGTAAAAATATACCATCTGATAGTAACTGATGCGCCCCTGTTACTATCTCACACCACATAGTAACTTAGCAACTGATGAACATTAATTATTATCTCGTGTTCACCAGTTACAAAAAAACATATAGTTTGTCATTCGCACGAGATAATAACTGGTCAGCACAAGGTAGTAACTGGTGCGCAGCAGTTACTATCTGGTGCGTACCATACAATAACCTCACAACTGGTGAGCATTAGTTACTATCTCTTGCTCTCCAGTTTGAAAAAAAAAGTTTGTCGTGCACACCAGATAGTAATTGGTGCGCACCAGCTACTATGTTTTGCTCACAAGAAAAAAAAAGTTTCTCATGTGCACTTGCACCTCC…
O95398	2.55771	0.164403	0.0231633	sp|O95398|RPGF3_HUMAN`O95398`Q:1-810,H:48-865`57.4%ID`E:0`RecName: Full=Rap guanine nucleotide exchange factor 3; AltName: Full=Exchange factor directly activated by cAMP 1; AltName: Full=Exchange protein directly activated by cAMP 1; Short=EPAC 1; AltName: Full=Rap1 guanine-nucleotide-exchange factor directly activated by cAMP; AltName: Full=cAMP-regulated guanine nucleotide exchange factor I; S…	GO:0005952^cellular_component^cAMP-dependent protein kinase complex`GO:0012505^cellular_component^endomembrane system`GO:0005886^cellular_component^plasma membrane`GO:0030552^molecular_function^cAMP binding`GO:0008603^molecular_function^cAMP-dependent protein kinase regulator activity`GO:0005085^molecular_function^guanyl-nucleotide exchange factor activity`GO:0001525^biological_process^angiogenes…	MHLFRSHYYQVFPNRNSVETPTIQGISWTPLPEALDSKDTMKQFLSDRVVKAARSVYTVMNEKNPGLIRDRKHHLKTYRQCCSGKELVDWLMKQNECLQSRSQAVGMWQVLVDEGILVHVKHELNFQDKEAQFYRFQDSEFGLSHVPNEKESEDELQEALSLLSQLGPDALLTMILRKTPSQRTAEDIEVIYEELLHVKAAAHLSTSVRKELAAVLVFESHAKAGTVLFSQGDKGTSWYIIWKGSVNVITHGKGIVTTLHEGEDFGQLALLNDAPRAATIILREDNCHFLRVDKQDFIRILKDVEANTVRLEEHGKTVLVLEQSAQSAGQGSAGTNSKYTVMSGTPEKILEHLLETIKLDSNGNDPIDPCVIDFLLTHKVFMPTSQLCPALQHHYQAEL…	GAGAAGACGAGAAAAAAAAATGCGCAGCTTGGAATTGACGCAAAGATAGATTGACGCGCCGGGAGCCATGCGCGGGCACGCCGGGATCCGAACCTTCAACCGGGAGGCTGTTCTGATCTGATCTGATCTGATCTGAGGCGACATGCATCTGTTTCGGAGTCACTATTACCAAGTGTTCCCCAACCGCAACTCAGTGGAGACGCCGACGATCCAGGGCATCAGCTGGACTCCACTGCCAGAGGCCTTGGATTCGAAGGACACAATGAAGCAGTTTCTATCAGATCGGGTCGTGAAGGCTGCCAGGTCGGTGTACACCGTGATGAACGAGAAGAATCCGGGCCTTATCCGAGACAGGAAGCATCACCTGAAAACCTACAGACAATGCTGCTCTGGTAAGGA…
Q3TLP5	2.54361	3.15008	0.039186	sp|Q3TLP5|ECHD2_MOUSE`Q3TLP5`Q:34-320,H:8-296`61.64%ID`E:6e-94`RecName: Full=Enoyl-CoA hydratase domain-containing protein 2, mitochondrial; Flags: Precursor;`Eukaryota; Metazoa; Chordata; Craniata; Vertebrata; Euteleostomi; Mammalia; Eutheria; Euarchontoglires; Glires; Rodentia; Sciurognathi; Muroidea; Muridae; Murinae; Mus; Mus.	GO:0005739^cellular_component^mitochondrion`GO:0016829^molecular_function^lyase activity`GO:0006631^biological_process^fatty acid metabolic process	MAVLVAKRTVSGFSWWRSSALSLRGTLGRSARDAARLPCLGLVCVGHRRLHTEEPVEVDFKRLEGKDEGIIEVLMCRHKARNALGHVFVSQMRELMTALSCDSAVRVVILRSLVPGVFCAGADLKERALMNHTESDLFVHSLRSLMTQIAMLPSPTIAAIDGVALGGGLEVALACDLRTAAYSAQMGLIETTRGLLPGAGGSQRLPRTVGITLAKELIFTGRRVGGQAALDMGLVNRAVGQNQAGDAAYREALSLAREILPQAPIAVRMAKEAMNRGMEVDIGSAMAIERMCYARVIPTRDRQEGMAAFIEKRPPRYTGE*	TACTATTATACATCACCTTTTAACAAAAGTTTTTTAAATGCATTTTTTTAAAGTGCTTTTTATTTTTTTCCTCCACTGAGCCCAACTTTCCTGTCATTTCTTTCCTTAGCCTTTTCTTTAAAAATTAAACATTTTAAATATCCTTTTTAACATTTTTTTTGTTTGCCTTTTCCATGATCCTGTTTGAATTGGTAAAAAATGCAACCATTTGATTTCTGGCATTTATCTTTACCTATGAACCATATCCTCTATAAGTCAGTGTTAGAGGACTTAAAAATTAAAACTATGAACTCAATTTATGTGATATTCTTATGCCATAAATAACAAATAAAACCCCAATTTAAATAGATTTATGCTCTACACAGTAATGATGAACAAAGATTCCACAATCTTGACTTT…
O55012	2.53567	3.49386	0.0175769	sp|O55012|PICA_RAT`O55012`Q:1-579,H:1-640`61.8%ID`E:0`RecName: Full=Phosphatidylinositol-binding clathrin assembly protein; AltName: Full=Clathrin assembly lymphoid myeloid leukemia protein; Short=rCALM;`Eukaryota; Metazoa; Chordata; Craniata; Vertebrata; Euteleostomi; Mammalia; Eutheria; Euarchontoglires; Glires; Rodentia; Sciurognathi; Muroidea; Muridae; Murinae; Rattus.	GO:0030118^cellular_component^clathrin coat`GO:0005905^cellular_component^coated pit`GO:0005768^cellular_component^endosome`GO:0005794^cellular_component^Golgi apparatus`GO:0005886^cellular_component^plasma membrane`GO:0014069^cellular_component^postsynaptic density`GO:0045211^cellular_component^postsynaptic membrane`GO:0042734^cellular_component^presynaptic membrane`GO:0008021^cellular_component…	MSGQSITDRITAAQHSMTGSAISKAVCKATTHEISGPKKKHLDYLIHCTNEMNVNIPQLADTLFERTANSSWVVVFKALITTHHLMMYGNERFIQYLASRNTLFNLNNFLDKGALQGYDMSTFIRRYSRYLNEKAMSYRLVAVDFTKMKRGIDGVMRTMNTEKLIKTLPIIQNQLDALLDFQANPNELTNGVINSAFMLLFKDSIRLFAAYNEGVINLLEKYFDMKKNQCKDALDIYKKFLYRMTKLSEFLKVAEQVGIDQGDIPDLSQAPSSLLEALEQHLASLEGKKTKEMNADTRASTLSSAVSSLSSTGMSFSRMDEKEKQQALEEEQARLQALKDQRLKEISMQTPPAASPVSQSAGSASNNNHITQTPELFSSTLPANSLNSDLFDLQPAFIP…	GACCAGGAGAGAGAAAACAATTTTTATCCATAATAAACAAATATACTGCTGTAAAATAAAAGCCTGTAACTTCTGTCAGCTGTAACATTTGTTTGCCTTTCCATGCTTGATACAATCCATATATTTTCTGCATTAAATAAATAGAAAAAAATGTACAAAGAGAGACAGAAGAGAAAGACAGATCAACAGGTGGGGGGGGTTCTGCTTTGAAAACATTTGGCATCACACGACGGATCCGGATGTATGAATCTGCATTAACCCGCTGACCCCCCCGTAACCTACACACTGCTATGCTAACATATCGTCCAGAAGAAATGGAAAGAAATTGAAAGAAAGCAGCATTTGTTTTGAAGCCGTGTTGCACGTGGATTTCTTTATATACAGAAAAACGAGGCAGCA…
Q9UF33	2.52941	0.448118	0.0382225	sp|Q9UF33|EPHA6_HUMAN`Q9UF33`Q:1-120,H:582-701`85%ID`E:6e-56`RecName: Full=Ephrin type-A receptor 6; EC=2.7.10.1; AltName: Full=EPH homology kinase 2; Short=EHK-2; AltName: Full=EPH-like kinase 12; Short=EK12; Flags: Precursor;`Eukaryota; Metazoa; Chordata; Craniata; Vertebrata; Euteleostomi; Mammalia; Eutheria; Euarchontoglires; Primates; Haplorrhini; Catarrhini; Hominidae; Homo.	GO:0005887^cellular_component^integral to plasma membrane`GO:0005524^molecular_function^ATP binding`GO:0005003^molecular_function^ephrin receptor activity	MTSEEKRRTNYQNGSVPFPGIKTYVDPDTYEDPTQAVHEFTKEIDPSRIHIERVIGAGEFGEVCSGRLRTPGKKEIAVAIKTLKGGYVERQRRDFLREASIMGQFDHPNIIRLEGVVTKSRP	CAGGCCGACTTTTTGTAACAACGCCCTCCAGCCGGATGATGTTTGGGTGGTCAAACTGGCCCATTATGGATGCTTCGCGCAGGAAGTCCCGCCGCTGACGCTCAACATAACCTCCTTTAAGAGTCTTTATTGCCACGGCGATTTCCTTCTTCCCCGGCGTCCTCAGGCGTCCACTGCACACCTCCCCGAATTCACCGGCTCCAATCACTCTCTCAATGTGGATCCTGGATGGGTCAATCTCCTTGGTGAATTCATGCACGGCCTGTGTGGGGTCCTCATAGGTGTCGGGGTCCACATATGTCTTTATTCCTGGAAAAGGGACACTTCCATTTTGATAATTAGTCCGTCGTTTTTCTTCTGAGGTCATCTTGGCCTTAAAGTACCACTGACATTTGAGAT…
P08183	2.51936	4.65049	0.0151612	sp|P08183|MDR1_HUMAN`P08183`Q:39-1286,H:32-1276`64.76%ID`E:0`RecName: Full=Multidrug resistance protein 1; EC=3.6.3.44; AltName: Full=ATP-binding cassette sub-family B member 1; AltName: Full=P-glycoprotein 1; AltName: CD_antigen=CD243;`Eukaryota; Metazoa; Chordata; Craniata; Vertebrata; Euteleostomi; Mammalia; Eutheria; Euarchontoglires; Primates; Haplorrhini; Catarrhini; Hominidae; Homo.	GO:0016324^cellular_component^apical plasma membrane`GO:0009986^cellular_component^cell surface`GO:0000139^cellular_component^Golgi membrane`GO:0016021^cellular_component^integral to membrane`GO:0046581^cellular_component^intercellular canaliculus`GO:0005524^molecular_function^ATP binding`GO:0042626^molecular_function^ATPase activity, coupled to transmembrane movement of substances`GO:0008559^mol…	MESTERKMSSAKQEQNGYLGKEKDEKKKGKKKEKAPKEPMVSPIAVFRFADGWDILMLITGTVMAIANGAVLPLMCIVFGDMTDSLINGVPPNMTEEYYNLTLINMTANIEEEMTVFAVYYSIMGAVVLVAAYLQVSLWTIAAGRQVKRIRKLFFHKIMQQDIGWFDINETGELNTRLTDDVYKIQEGIGDKVGMLIQSVSSFITAFVIGFTKGWKLTLVILAVSPALGISGALFSKVLTSFTSKEQSAYAKAGAVAEEVLSSIRTVFAFSGQNKEIERYHKNLEQAKKMGMKKAVSANIAMGFTFLMIYFSYALAFWYGSTLILSGEYTIGSVLTVFFVVIIGVFTMGQTSPNIQTFASARGAAHKVYHIIDNKPIIDSYSEDGFKPDFIKGDIEFSN…	CAAAACTTTAATAGATACATATCAGGACTTTCTACAAAAGATAAGTTATTAATAAACACGATTAGGACATTCATGTACATTAGCATAAACTCAAGATTTTTCTTTTTAATATACAGTATTTTTGGTTAAGCCGATCAGGCACTTTGGTTCTACCAATATTTTTGGTCTGATCATCCAAAGCTGTGATAAGGTGCCCGATACCCAAACACATTTCCTAAAGAACACGTAATAATATGCAGCGACGGTCCCAGTGTTAGTCAAACTTGGTGGTACACTATTGCACTTTTAGCATGAATTAAAGTGCATGAATCACTATTAAGTGCACTTAAGAAAAGTCATTTAAAATTAAGCGTGCTTCAAGTTGCTTTATCTTAACAAAAAAATTGTTTTTTTCTTTAG…
Q8IYK4	2.48325	5.24518	0.00472063	sp|Q8IYK4|GT252_HUMAN`Q8IYK4`Q:15-611,H:27-626`66.11%ID`E:0`RecName: Full=Procollagen galactosyltransferase 2; EC=2.4.1.50; AltName: Full=Glycosyltransferase 25 family member 2; AltName: Full=Hydroxylysine galactosyltransferase 2; Flags: Precursor;`Eukaryota; Metazoa; Chordata; Craniata; Vertebrata; Euteleostomi; Mammalia; Eutheria; Euarchontoglires; Primates; Haplorrhini; Catarrhini; Hominidae; …	GO:0005788^cellular_component^endoplasmic reticulum lumen`GO:0050211^molecular_function^procollagen galactosyltransferase activity`GO:0030198^biological_process^extracellular matrix organization`GO:0009103^biological_process^lipopolysaccharide biosynthetic process	LDAEMRARGALWLLAALLAARAPVSAGTAPLQPESPLQRPKVMIAVLARNAAHSLPFYLGCIDRLQYPKERIAVWAATDHNVDNTTAMLREWLRKAQQVYHFVEWRPMEEPRSFTDEWGPKHWPPSRFNHVMKLRQAALRTARERWADYILFADTDNLLTNPRVLDLLIAENLTLVAPMLESRSLYSNFWCGITPQGYYRRTPDYQPIREWKRVGCFPVPMVHSTFLVDLRRESSKDLTFYPPHPDYSWAFDDIMVFAFSARQADVQMFVCNREHYGFLPVPLKAQQTVEDEGESFIHTITEALIDHDMAPSEHVYVQPPPQTKMGFEEIFLINLKRRLDRRTRMLKTMASLGLQATSVDAVDGKALNTSQLQMLGIEMLPGYKDPYSGRVLTRGEIGC…	AAAATGAACTGAATTGCTGCATAAATAAGAATGAAATACATCTGAATAAGAATTGGATACATTTTATTTCAATATTTTTCAAAAATCTTTGAAGTCCCACCGTGATAATCTTCTGATCTGTTTTCAAATCGGTCCCAGTCGTCTTTTCATAATATCGCTGTAGCCAAAATCCAAAAACTTGTGTAATTTTCTAGGACATAGTTTCTGTAGAGCAGCAGGAGTTCTCTATGGATTCAACTTTGAGTTGTGGGTGGGAATCCCGGCGCGATTCCTCTCCCCACTGCGTAGGGAACTCGTTTGTCCGCCGCCTAACAGCATTTTTTTTCTGCTCTTGATTCACAAAATCAAGAAATGCTCAGAAATGGAATTTTGAGCTGAATTTTCTTTATTCTTGTTAGA…
Q62640	2.47345	0.230298	0.0157621	sp|Q62640|GRID1_RAT`Q62640`Q:1-496,H:83-577`79.03%ID`E:0`RecName: Full=Glutamate receptor ionotropic, delta-1; Short=GluD1; Short=GluR delta-1 subunit; Flags: Precursor;`Eukaryota; Metazoa; Chordata; Craniata; Vertebrata; Euteleostomi; Mammalia; Eutheria; Euarchontoglires; Glires; Rodentia; Sciurognathi; Muroidea; Muridae; Murinae; Rattus.	GO:0030054^cellular_component^cell junction`GO:0016021^cellular_component^integral to membrane`GO:0030288^cellular_component^outer membrane-bounded periplasmic space`GO:0005886^cellular_component^plasma membrane`GO:0045211^cellular_component^postsynaptic membrane`GO:0005234^molecular_function^extracellular-glutamate-gated ion channel activity`GO:0004970^molecular_function^ionotropic glutamate rec…	MNQGILALVTSTGCAAASALQSLTDAMHIPHLFIQRKGDGVPRTACTLNPSPDGESYTLAARPPVRINDVLLTLVSELHWQKFIIFYESDYDIRGLQTFMDQSSRLGLDVSLQRVDRNISRVFTDLFNTMRTEELNRYRDTLRRAVLLMSPRGAQVFIHQAVETNLASKDSHWVYANEEVSDSDIVELVHGSLGRMTIIRQIFPMWRDTNVRCMRNNHRISSLLCDPQEGYLQSLEVSNLYLYDSVLMLANAFYRKLEDRKWHSMASLNCMRKSTKPWNGGWSMLDTIQKGRISGLTGMMDFRAEGSNSHVQFEVLGTSYSETFGKDVKKLATWDSIRGLNGSLRENRIDSSMQGVTLKIVTLLEEPFVMAAENILGQPKRYKGFSIDVLDALAKILGF…	GCCCACCACGGGGATGGCGGCGGCGATGCACGCCCACACAGCCAGGTCGAACGGCGCCAGTAAGGAAAAAATGTTGATCTTTTCCTCAGACTTGCGCATCAAGATTCCCACAGAGTAGTCCAGGTAGCGCTTGCTAAAGTCAACCACGCTTTCACGCTCCGGTGTGATGGTGATGGCCGATATGGCCAAGTCGGCTCGTTTGCCTATGAGTTCTCCAATCATGCCATTCCAGGATCCATTGGGTTGTATTGAGCCATATTTCCCATCGGCAACTTGGTAGATGTCATACTTGAACCCCAGGATCTTAGCCAAGGCATCAAGGACATCGATTGAGAAACCCTTGTACCTTTTGGGTTGACCAAGAATGTTTTCTGCTGCCATCACAAACGGTTCCTCCAG…
A0JMA9	2.47182	2.08484	0.00458113	sp|A0JMA9|KATL2_XENTR`A0JMA9`Q:26-288,H:279-542`79.55%ID`E:1e-123`RecName: Full=Katanin p60 ATPase-containing subunit A-like 2; Short=Katanin p60 subunit A-like 2; EC=3.6.4.3; AltName: Full=p60 katanin-like 2;`Eukaryota; Metazoa; Chordata; Craniata; Vertebrata; Euteleostomi; Amphibia; Batrachia; Anura; Pipoidea; Pipidae; Xenopodinae; Xenopus; Silurana.	GO:0005737^cellular_component^cytoplasm`GO:0005874^cellular_component^microtubule`GO:0005524^molecular_function^ATP binding`GO:0008568^molecular_function^microtubule-severing ATPase activity	MAKTKELSKDTRDTIVDLHKAGKGNRYPQLFTGILSPWKGLLLYGPPGTGKTLLAKAVATECRTTFFNISASSIVSKWRGDSEKLVRVLFELARYHAPSTIFLDELESVMSQRGSSFGGEHEGSRRMKTELLVQMDGLSRSEDLVFVLAASNLPWELDHAMLRRLEKRILVGLPSSPARQAMISHWLPPLSCTGGVELKTSLDYKMLAEQMEGYSGSDIRLVCKEAAMRLVRTVFDSLESHQNCSDISAIQLGAVTTADFVEVIAHTKPSARSLMERYTAFEREYQSV*	TCTCACAAAATGTTTTTTCATCAGTTTTTATTACTTTCACAGCTTAAATGTCAAAGATAAAATCTTAAAAAATATCAAAAGCTAACAAAGCAATGACAGTGAATTTACAGTATGTCTTTGAAATGTTCTAAAGTGAAACCAGAGATATGTTTATCCCGTCAAAAAGAGAAGAAGCTGAGTCTCAGACAGACTGGTACTCTCTCTCAAAGGCCGTGTAGCGCTCCATCAGGCTCCGGGCTGATGGTTTGGTGTGTGCGATCACCTCCACAAAGTCCGCTGTAGTCACAGCTCCCAGCTGGATGGCGGAAATGTCAGAACAATTCTGATGAGACTCCAGAGAGTCAAACACTGTCCGGACGAGTCTCATGGCAGCCTCTTTACACACCAGTCTGATATCAG…
A5PF10	2.46609	2.48027	0.0067649	sp|A5PF10|NEUR1_PIG`A5PF10`Q:13-421,H:1-414`55.74%ID`E:6e-130`RecName: Full=Sialidase-1; EC=3.2.1.18; AltName: Full=Acetylneuraminyl hydrolase; AltName: Full=Lysosomal sialidase; AltName: Full=N-acetyl-alpha-neuraminidase 1; Flags: Precursor;`Eukaryota; Metazoa; Chordata; Craniata; Vertebrata; Euteleostomi; Mammalia; Eutheria; Laurasiatheria; Cetartiodactyla; Suina; Suidae; Sus.	GO:0016023^cellular_component^cytoplasmic membrane-bounded vesicle`GO:0043202^cellular_component^lysosomal lumen`GO:0005765^cellular_component^lysosomal membrane`GO:0005886^cellular_component^plasma membrane`GO:0052794^molecular_function^exo-alpha-(2->3)-sialidase activity`GO:0052795^molecular_function^exo-alpha-(2->6)-sialidase activity`GO:0052796^molecular_function^exo-alpha-(2->8)-sialidase ac…	MCRTASGFVLSVLGSSRAAPVRLGFVDRSKMRVVGRSSGVFVGPVLVSLLCALLHRCVCYNTSAQIDPVVFEEQLLWVSGGSGHVDTYRIPVLTFTPKGSLLAFAEGRKSTSSDIGAKFLAMRRSTDRGNTWSPTVFIVDDVKNPDGLNLGSVVVDQEVGSIFLIYSLCFHLYHCRPPSTMMVESRDDGLSWSSPRNLSVELGVKAFAPGPGFGIQKRYSPAKGRLVVCGHGSLEGDGVFCILSDDHGKSWRNGAALKSIPYNQKKSAQDFNPDECQPVEMRDGSILINVRNQNNYHCRCRVMARSLDGGESLPIDELYFDSELVDPAVAAGALQKNGILYFTNPSNDRNRVNLTLRWSLTNGSSWEKTAVQIWAGPSGYSCMSSLDTGSVEDQKFVFV…	GGAGGAAACAAACATAGAGCAGTTTATAAAATAAATAATAATCAAAGAAAAAAATTCATGTGGTTTTAATTGATTTGGGTGATTAAAATATATATTATAATCAGTCTTCTGTGTTCTGCTGAGTTTTTATAGTTTTCCCTCTTCTTTACACTCGACACCAGCAGCTTTTTTCTGGCTGTAAAAGTGTTAACTTATTTTTAGGAGGAAAAAAATACACATTTTTTTGTGATAATCAGAATTCTGATTTAATTTATTTTAAAGAAACTTTGAAAAATATCATCAATGTAGAACAGTATGAAAAAAAAAAACATTTTCATGCATCATAAGAGCTTTTAAAGTACAGATTTACAGATTTGAATCAAGCTGGCTCATTTTTTTTAAAACCATCACAGAAATTAA…
Q92887	2.4488	4.63194	0.0369858	sp|Q92887|MRP2_HUMAN`Q92887`Q:1-861,H:670-1537`63.17%ID`E:0`RecName: Full=Canalicular multispecific organic anion transporter 1; AltName: Full=ATP-binding cassette sub-family C member 2; AltName: Full=Canalicular multidrug resistance protein; AltName: Full=Multidrug resistance-associated protein 2;`Eukaryota; Metazoa; Chordata; Craniata; Vertebrata; Euteleostomi; Mammalia; Eutheria; Euarchontogli…	GO:0016324^cellular_component^apical plasma membrane`GO:0005887^cellular_component^integral to plasma membrane`GO:0046581^cellular_component^intercellular canaliculus`GO:0005524^molecular_function^ATP binding`GO:0042626^molecular_function^ATPase activity, coupled to transmembrane movement of substances`GO:0008514^molecular_function^organic anion transmembrane transporter activity	VGAVGSGKSSLMSALLGEMHSTEGFINIKGSLAFVPQQAWIQNATLRDNILFGSSHEEKRFQEVIQACALGPDLKLLAAGELTEIGEKGINLSGGQKQRVSLARAAYSQADIYLLDDPLSAVDSHVGKHLFDKVIGPNGLLKNKTRILVTHGVSFLPYVDEVVVLVDGKISEIGSYSSLRASKGAFSEFLDTYAKEQNDQSNSNKDGCQDTEDLDIIPEREDTQPDSPLEDTVSFTLKRENSIRRSQRGSSVRVRKNSTLKKSEDADETKAGQRLIEKEAMETGQVKFSVYLQYLRALGWGYTAMVFLIYFIQNIAFIGQNLWLSDWTNDAVDYFNQTYPNWKRDTRVGVFGALGVAQGFLVFLGTLLLANASVNASRILHSRLLNNMLRVPMIFFDTT…	GTACAGTTACATTTCTAAATGTTTCTTCTTATATACATACATATCATCTTATCACAATGTTAATATTCTGAACATGAAACAAAAACACATTTAAGCGATCAAATCATCTTCAGGAGGGAAAATGCAAGAACAAAATTACAGAGCTGAGAATTCTTCCTGTGCTATCCCAGCATCCTTTGCCATGGAGTAGAAATAGCCCCGATTCTCAAGAAGGTTGCTTGGTGAGTCAAATTCAACAATTTTACCAGCATCAAGGACCATCACTCTGGAGCTGTCCATGATGCTGTGCAGCCGATGAGCGATGGTGAGGACAGTGCAGTGTGCAAACTCTTTGCGGATGGTGTTCTGTATCAGGTCGTCGGTCTCGAGGTCAACAGCTGCAGTGGCCTCGTCCAGGAT…
O60341	2.44006	0.635492	0.0164866	sp|O60341|KDM1A_HUMAN`O60341`Q:22-769,H:117-851`91.44%ID`E:0`RecName: Full=Lysine-specific histone demethylase 1A; EC=1.-.-.-; AltName: Full=BRAF35-HDAC complex protein BHC110; AltName: Full=Flavin-containing amine oxidase domain-containing protein 2;`Eukaryota; Metazoa; Chordata; Craniata; Vertebrata; Euteleostomi; Mammalia; Eutheria; Euarchontoglires; Primates; Haplorrhini; Catarrhini; Hominida…	GO:0000790^cellular_component^nuclear chromatin`GO:0005667^cellular_component^transcription factor complex`GO:0050681^molecular_function^androgen receptor binding`GO:0003682^molecular_function^chromatin binding`GO:0050660^molecular_function^flavin adenine dinucleotide binding`GO:0034648^molecular_function^histone demethylase activity (H3-dimethyl-K4 specific)`GO:0032454^molecular_function^histone…	IMKGMMSWMSVLMMLLLCLLLQVEYREMDESLANLSEDEYYSEEERNAKAEKERKQVVPPPAPPPEEENESEPEEPSVYPLGLEGAAFQSRLPHDRMTSQEAACFPDIIGGPQQTQKVFLYIRNRTLQLWLDNPKIQLTFEATVQQLEAPYNSDAVLVHRIHSYLERHGLINFGIYKRVKPLPAKKTGKVIVIGGGVSGLAAARQLQSFGMDVTVLEARDRVGGRVATFRKGNYVADLGAMVVTGLGGNPMAVVSKQVNMELAKIKQKCPLYEANGQAGERCTSVPKEKDEMVEQEFNRLLEATSYLSHQLDFNFLNNKPVSLGQALEVVIQLQEKHVKDEQIEHWKKIVKTQEELRDLLNKMVSTKERVKELHQQYKEACEVKPPRDITAEFLVKSKH…	TCTGTCATGGCAGCATGCCACTCACATTAAACCAACAGCTTTTCTGTCCGTCAGCTGAAGCTTCTTCACTTAAATATTCTGCCTCAAACAGTAGAAATGAAATCTGAAAGACAAACGGCTAAAAGAAACAGGAAACGCTTTTGTGACAACTTCCTTTGAAATGTAAACGCTGTAGTGGGAGGGGCTCTGCTGGCTCCAGAGTTGAACTTTTGTGTGTTTGTGGACGGGTTTTCAACCGTTATTTCTAGTTTGTACAACAGTTCATAAATAGAAAAATTCCACGTTTGACTCTAGCGAAGAGAATTTCCTAAATGTGACTGAAGGGAGGTGAAATGAGAGCTAGTGGTGTGTTTATAATGGGTTTCTTAATTACGCTTTTTCTGAAACTAGAAGTGTAAT…
Q6ZQ88	2.43361	1.35204	0.021033	sp|Q6ZQ88|KDM1A_MOUSE`Q6ZQ88`Q:35-838,H:46-852`87.09%ID`E:0`RecName: Full=Lysine-specific histone demethylase 1A; EC=1.-.-.-; AltName: Full=BRAF35-HDAC complex protein BHC110; AltName: Full=Flavin-containing amine oxidase domain-containing protein 2;`Eukaryota; Metazoa; Chordata; Craniata; Vertebrata; Euteleostomi; Mammalia; Eutheria; Euarchontoglires; Glires; Rodentia; Sciurognathi; Muroidea; Mu…	GO:0000790^cellular_component^nuclear chromatin`GO:0005667^cellular_component^transcription factor complex`GO:0050681^molecular_function^androgen receptor binding`GO:0003682^molecular_function^chromatin binding`GO:0050660^molecular_function^flavin adenine dinucleotide binding`GO:0034648^molecular_function^histone demethylase activity (H3-dimethyl-K4 specific)`GO:0032454^molecular_function^histone…	MLSSKKSDPASSSSSSSSSAGAGGGERVLGSDAQTGPSASAAGALDSKKKERSSPSGEAGGTSFPHQSGAGGADQDLAEVRRTSRRKRAKQVEYREMDESLANLSEDEYYSEEERNAKAEKERKQVVPPPAPPPEEENESEPEEPSVYPLGLEGAAFQSRLPHDRMTSQEAACFPDIIGGPQQTQKVFLYIRNRTLQLWLDNPKIQLTFEATVQQLEAPYNSDAVLVHRIHSYLERHGLINFGIYKRVKPLPAKKTGKVIVIGGGVSGLAAARQLQSFGMDVTVLEARDRVGGRVATFRKGNYVADLGAMVVTGLGGNPMAVVSKQVNMELAKIKQKCPLYEANGQAGERCTSVPKEKDEMVEQEFNRLLEATSYLSHQLDFNFLNNKPVSLGQALEVV…	TCTGTCATGGCAGCATGCCACTCACATTAAACCAACAGCTTTTCTGTCCGTCAGCTGAAGCTTCTTCACTTAAATATTCTGCCTCAAACAGTAGAAATGAAATCTGAAAGACAAACGGCTAAAAGAAACAGGAAACGCTTTTGTGACAACTTCCTTTGAAATGTAAACGCTGTAGTGGGAGGGGCTCTGCTGGCTCCAGAGTTGAACTTTTGTGTGTTTGTGGACGGGTTTTCAACCGTTATTTCTAGTTTGTACAACAGTTCATAAATAGAAAAATTCCACGTTTGACTCTAGCGAAGAGAATTTCCTAAATGTGACTGAAGGGAGGTGAAATGAGAGCTAGTGGTGTGTTTATAATGGGTTTCTTAATTACGCTTTTTCTGAAACTAGAAGTGTAAT…
Q5DU56	2.42107	1.3675	0.0026852	sp|Q5DU56|NLRC3_MOUSE`Q5DU56`Q:302-733,H:114-533`25.93%ID`E:4e-27`RecName: Full=Protein NLRC3;`Eukaryota; Metazoa; Chordata; Craniata; Vertebrata; Euteleostomi; Mammalia; Eutheria; Euarchontoglires; Glires; Rodentia; Sciurognathi; Muroidea; Muridae; Murinae; Mus; Mus.	GO:0005737^cellular_component^cytoplasm`GO:0005524^molecular_function^ATP binding`GO:0007249^biological_process^I-kappaB kinase/NF-kappaB cascade`GO:0032088^biological_process^negative regulation of NF-kappaB transcription factor activity`GO:0042110^biological_process^T cell activation	MDEGAGANTFSHGGNYDEEKEKWERPPSSYGSMKSESEESEDLERDKDGAEQEGAVLPERPAPVVMGSQIYQSPETLYTMNTEQTKPPGALVIETGSGDLDMAVDDYEDDEDEEDEDLYVTNSPEPPEPAVFEGLMQSDEGEQPGRLPTEQDMPFVFTNILKTLTPLKFEEMYKFRSWLKLTARDLKDTDFMEGDLLNFVDKMIEVLGHFKTLHFTISCLDSSGMKAEAAQLQKVCMKALIRYRLTEEINRKKKFVFEGLVESRSQNSLNQIFVEPKISTRICGAIDPSHEFRSKPITPLEVPDPESFTLLKNLFRLTKDDGTPVRTVATTGIPGSGMTLHTSKFCLDWAETTANRDLECIIRLPFHRFWSLKKSDSEDVSLLGMINNCTSAFKNLECY…	CTTCCCTTTGAAAAAAAGGCTGCGTTTTATTGAAATACAGCAGACATCAACAGGTTGTTTCGCTGACCTGGGCCACAGAAAACGCGCCTGAACACTCTTCGACTGATGCAAAAATTTTATGGCTATCATTTTTAAACGATTTTATTCGCTCCAGACACTCCCAAATTTCAGCTTTTCCCAAAAGCTGAAGAAGCAGAAGTGTTGGAAACTCAGCAAGAACAAGCTGGTGCTGCTCAATACAAACATGCTGGTACAGTAAAGGCGGCGGGAACAAGGTGGGAAAGAGGATCGGAAATCGGTGTTCAGGCCCGTTTCTGCGCCCAGGGGTGGAGGGTTGATAGTAGCAGAAGAAGCAGAATCTGTTAAAAAAAAACAAAAAAAAAAATGCAGGGATGGCCT…
Q6P6T4	2.41769	3.57096	0.0230686	sp|Q6P6T4|EMAL2_RAT`Q6P6T4`Q:7-647,H:8-648`68.64%ID`E:0`RecName: Full=Echinoderm microtubule-associated protein-like 2; Short=EMAP-2;`Eukaryota; Metazoa; Chordata; Craniata; Vertebrata; Euteleostomi; Mammalia; Eutheria; Euarchontoglires; Glires; Rodentia; Sciurognathi; Muroidea; Muridae; Murinae; Rattus.	GO:0005737^cellular_component^cytoplasm`GO:0005874^cellular_component^microtubule`GO:0003824^molecular_function^catalytic activity`GO:0008022^molecular_function^protein C-terminus binding`GO:0005102^molecular_function^receptor binding`GO:0008152^biological_process^metabolic process	MKKSLSKSKDYSFNAEDGFVRMFLRGRPVTMHISDQQKSSYSLDQKGALPDQKLKLQWVYGYRGRDCRSNLYLLPTGEIVYFIASVVVLYNTEEQQQRHYLGHTDDVKCLSVHPDMVTIATGQVAGNSKEGKLLAPHVRIWDSVSLNTIHVIGMGVFDRAVTCVSFSKSNGGAFLCAVDDANDHILSVWDWQKEKNLAEVKCSNDSVLGAVFHPMDNNLIVTCGKSHINFWTMEGKTLSKRQGLFEKHDKPKYVLCVAFAENGDTITGDSSGNIYVWAKGGNRITHAVSGAHEGGIFSICVLKDGTMVSGGGKDRRVVLWDHDYRKKAEMEVSDSLGPVRALAEGKPEELFVGTTKNAIIRAAFPDTLTPIVQGHTDELWGLDVHPSMEQFVTCAQDKL…	GGGCTGCTGGAGCTCTGTGTGTGTCGGCGCTGGTGACTGCAACGGAAACCTGCAGACATGAAGAAGTCTCTCAGTAAATCCAAAGACTACAGCTTCAATGCAGAGGATGGCTTTGTGAGGATGTTCCTGCGTGGTCGACCCGTCACCATGCACATCTCCGACCAGCAGAAGAGCAGTTACAGCCTGGACCAGAAGGGGGCGCTGCCGGACCAGAAGCTCAAGCTGCAGTGGGTGTACGGCTACCGCGGCCGCGACTGCCGCTCCAACCTGTACCTGCTGCCCACCGGCGAGATCGTGTACTTCATCGCCTCGGTGGTGGTCCTGTACAACACCGAGGAGCAGCAGCAGAGACACTACCTCGGCCACACGGACGACGTCAAATGCTTGAGCGTGCATCCT…
Q9QZH2	2.4088	3.50852	0.0291758	sp|Q9QZH2|BARD1_RAT`Q9QZH2`Q:12-778,H:28-766`36.21%ID`E:5e-128`RecName: Full=BRCA1-associated RING domain protein 1; Short=BARD-1; EC=6.3.2.-;`Eukaryota; Metazoa; Chordata; Craniata; Vertebrata; Euteleostomi; Mammalia; Eutheria; Euarchontoglires; Glires; Rodentia; Sciurognathi; Muroidea; Muridae; Murinae; Rattus.	GO:0070531^cellular_component^BRCA1-A complex`GO:0031436^cellular_component^BRCA1-BARD1 complex`GO:0005737^cellular_component^cytoplasm`GO:0046872^molecular_function^metal ion binding`GO:0042803^molecular_function^protein homodimerization activity`GO:0003723^molecular_function^RNA binding`GO:0004842^molecular_function^ubiquitin-protein ligase activity`GO:0008270^molecular_function^zinc ion bindin…	MEDHVVEQTQDWKSTKEALASFRQLLLCSKWSCAGPQAGDGCAVCLSPAWVKDIQINRQLSSIIQLFCGLESLLNPTKPDSVDDTQTEGEAAVFKHKKNFKIWFSPRSRKVRCKVEKPSDVPVPENSGETVAPQLDAPAAQAQDLSVFNFTSSSQDSSSSQRCNSKNQKKKKKQQRSSKRNANSSQSQVQRTSRTTREQTKQNIKKKRLEAINQQWGITDAEHASSELEQQCDNMSRRSSKRVSFSSSAVTCEEPPAKALKGNTELGPTQSTAGENVAESCSSPPRSQTQLALSMSGSVGKLKIACANEPSLDEDVVNQSNISTPDKCSKRVEKKNSVLESTPRRPRSSTTPRRKSLVEISPTVNNPRSLATPRKEKSTKNGKQRDATGLTLPERLSKS…	CTGGGCGGAAATAGTATTACGTTATCCTATGTCACTTCCGTAAATCTTTGGCGGGACATGAGAAACAAACAGGAAGTTGGGTTTGTTTTTAGAAACATTCTTACAGCCTTCAAAAAAAGTCATCTTTTCTTTTCAAAGTATGGAAGATCACGTTGTCGAGCAGACGCAGGACTGGAAAAGTACTAAAGAGGCACTTGCCAGCTTCCGGCAGCTTTTGCTTTGTTCCAAATGGTCCTGTGCCGGCCCTCAAGCAGGGGATGGCTGCGCGGTGTGCCTCAGCCCTGCGTGGGTGAAGGACATCCAAATCAACAGGCAGCTCAGCAGCATTATACAGCTCTTTTGTGGTTTGGAGTCCCTGCTCAATCCCACAAAACCAGACTCTGTTGATGACACCCAAAC…
A3KP37	2.39944	2.07262	0.0241953	sp|A3KP37|NDUF5_DANRE`A3KP37`Q:5-313,H:10-320`76.85%ID`E:2e-145`RecName: Full=NADH dehydrogenase [ubiquinone] 1 alpha subcomplex assembly factor 5; AltName: Full=Probable methyltransferase C20orf7 homolog, mitochondrial; EC=2.1.1.-; Flags: Precursor;`Eukaryota; Metazoa; Chordata; Craniata; Vertebrata; Euteleostomi; Actinopterygii; Neopterygii; Teleostei; Ostariophysi; Cypriniformes; Cyprinidae; D…	GO:0005743^cellular_component^mitochondrial inner membrane`GO:0008168^molecular_function^methyltransferase activity	GPGPGGPRACRGMSGSMNVFNRQMKRRQKNWAASLQDGQQYDYLRDEVGSRVADRVYDIARTFPLALDIGAGKSHISRHLSEEVVERLLLTDVSQQALKRRCQTPIPTRCVLADEEFLPFQENSFDLVVSSLSLHWINDLPGTLKQIHQVLKPDGVFIGAMVGGETLYELRCSLQLAETEREGGFSPHVSPFTAVTDLGNLLGQAGFNMLTVDIDDVQVLYPGIMEVMMDLQGMGESNCAWNRRTLLHRDTMLAAAAVYKEMYGSEDGAVPATFEILYMIGWKPHESQAKPAKRGSATASFGDLSRISRPTRDNNP*	AGACCACACACGAGTTTATTCACTGAAGCAAATCACAGAATGATGTTTGTGGAAGACGTTCAGACGGCTCCAGAACCTTCATCCAGTCCAGACCTGGTTCCAGCAGAACCTGCGGGTCCTGAAAACCAGAACTCCTCTGATACCAGGAGAACATCTGACAGAAACCAGAGAGCTGATGGAGGATCGGCCCGGATCGGCCCGGTCCAGATTTTCCAACATCTCCTTTGGTTCACTAAGAACGCTGAAGGATTCTGGTTTATTGTGTTTTTTCAGAACAAATCAGTGAACTGAGTTGAGATGAACTTGTTCAGAGCGTGGTCTTCACTCTGACCGTCAGTCAGTCTCTACACGAGTCTCTACGGGTCGCCTCTGGTTCTATGGGTTGTTGTCCCGGGTCGG…
O14746	2.38964	3.34443	0.0114281	sp|O14746|TERT_HUMAN`O14746`Q:9-1052,H:10-1096`34.75%ID`E:3e-162`RecName: Full=Telomerase reverse transcriptase; EC=2.7.7.49; AltName: Full=HEST2; AltName: Full=Telomerase catalytic subunit; AltName: Full=Telomerase-associated protein 2; Short=TP2;`Eukaryota; Metazoa; Chordata; Craniata; Vertebrata; Euteleostomi; Mammalia; Eutheria; Euarchontoglires; Primates; Haplorrhini; Catarrhini; Hominidae; …	GO:0005737^cellular_component^cytoplasm`GO:0000783^cellular_component^nuclear telomere cap complex`GO:0005730^cellular_component^nucleolus`GO:0005654^cellular_component^nucleoplasm`GO:0016605^cellular_component^PML body`GO:0005697^cellular_component^telomerase holoenzyme complex`GO:0046872^molecular_function^metal ion binding`GO:0042803^molecular_function^protein homodimerization activity`GO:0042…	MTSEDVSRVLELLRSLYKRTQTLQEFADGVVFRDGRRATLLQPSDSIVFQTFVRAVFVCSDEELREVRSSKQICTFSELLAFVLNNLKRSKSNNVLAQGYNWKTAQENKDVNLFRFQGDLSQSANYIHSSEQWKKVMAHLGPDFLLHLLGSFSVFVVAPPSCVFQICGAPAYDRVSVTTASSRFLLKHPSRRHTSSRLGKNRCSVKFKMRDSAEDEEKRRKKRRVESTNSSRKRKREPEEEESSKRRCDTHHEESSQHACSEAVLVESTVSENDKSSLKMPPETSAASLPLEGEPSWRSGTFPPLPSSQCFIRTMGLLYGGQGMQGFCLNRKKQTAAGLRRLQGQDLVRLVFFQGLPYLDKQTRDPKKLRLRFFRMVPVFGELLQRHRKCPYTRVLQRM…	CCATCATTTAAATAGTGCAACATTTCACACCAACAACATAAATTTCATAAAAACAAACCATAAATCGTCCCAGTTCCTCACAGAAAAATACTTAACACATAGTATAACATTCTTGAACTACATGAGGAACGTGGCTTCTAAAATTAGAATAACGAGAAGCTTGAAATCTGTCCGGATGTCTGCGCCTCTTCGTGTTTCCCTGTAACCTCATCGGGCCAGGACTGAATGTTATGTCCCACACCAGTTTCAGGTGGCAGCGTTTACACTTAAACAGAGAAGTCGCACTCACACAGCTGATATCCATCAGCAAACATGTTCTCAAATTCTGATTTTTATTGGTTCGTAACATCCTGTTTCTTGTCTTTAGGAACTGTTCCCTCAAACTGAGGTGAAGAACTA…
A7E300	2.38218	3.04124	0.0436433	sp|A7E300|RHG07_BOVIN`A7E300`Q:17-1154,H:39-1100`58.07%ID`E:0`RecName: Full=Rho GTPase-activating protein 7; AltName: Full=Deleted in liver cancer 1 protein homolog; Short=DLC-1; AltName: Full=Rho-type GTPase-activating protein 7; AltName: Full=START domain-containing protein 12; Short=StARD12; AltName: Full=StAR-related lipid transfer protein 12;`Eukaryota; Metazoa; Chordata; Craniata; Vertebrat…	GO:0005737^cellular_component^cytoplasm`GO:0005925^cellular_component^focal adhesion`GO:0016020^cellular_component^membrane`GO:0005096^molecular_function^GTPase activator activity`GO:0043547^biological_process^positive regulation of GTPase activity`GO:0007165^biological_process^signal transduction	MCHFILLDRGLWTQKTEIEAKEACTWLRAAGFPQYAQLYEDALFPIDISSVTRDHDFLDRDAIEALCRRLNTLNKCALMSLDLSPQRKRSEDSDEDEPCAISGRWTFQRDSKRWSRMEDLEVFSELPADATQPSFPKDQVSQKGKLGLREGNSSESVLTDLSEQPEVGSIHSSGSGGRGEEKGHAAALLNEAIPDGAIRANSVASMCSSSGTGGSGGANEDSLSDGLPPSPLESLRQFTFDVSTGMVGGSLDRGGDSGKSTRSRAKSFLKRMESLRLRSSATSKRKKKASPTGGKIEISGPVIKEGLDDDKLRKLNCVDISSINLNNQRNPTQTMTLNRNRSVSYSTQTSNGSTGSTGSSQSEASSGSAVSTPSPVTRARSHSTAAGFSKRGGMYLEGF…	TGCCTTTGACCGGCAAGAAAAAAAGGACAATCTGAAATGTGCCATTTTATTTTATTGGACAGGGGGTTGTGGACTCAGAAAACCGAGATTGAAGCCAAAGAGGCCTGTACTTGGCTCCGAGCTGCAGGGTTCCCACAGTACGCCCAACTTTATGAAGATGCCCTGTTTCCCATCGACATTTCTTCAGTCACCAGAGACCACGACTTCCTCGATCGTGATGCCATTGAGGCTCTTTGCAGGCGGCTAAATACCCTCAACAAGTGTGCTCTAATGAGTCTGGATCTGTCCCCACAAAGAAAAAGAAGTGAGGATTCAGATGAGGACGAACCTTGTGCCATTAGCGGCCGCTGGACCTTCCAGAGGGACAGCAAGCGCTGGTCACGGATGGAGGATTTGGAG…
Q4R6W9	2.33671	4.0403	2.52543e-05	sp|Q4R6W9|SNPC1_MACFA`Q4R6W9`Q:8-297,H:7-301`41.47%ID`E:8e-64`RecName: Full=snRNA-activating protein complex subunit 1; Short=SNAPc subunit 1; AltName: Full=Small nuclear RNA-activating complex polypeptide 1; AltName: Full=snRNA-activating protein complex 43 kDa subunit; Short=SNAPc 43 kDa subunit;`Eukaryota; Metazoa; Chordata; Craniata; Vertebrata; Euteleostomi; Mammalia; Eutheria; Euarchontogli…	GO:0005634^cellular_component^nucleus`GO:0003677^molecular_function^DNA binding`GO:0006355^biological_process^regulation of transcription, DNA-dependent`GO:0006351^biological_process^transcription, DNA-dependent	MDFCRRHVKADCEELLSRFRRTQSVRFEIFSGIWRDMKFASIFYGTLFHEKRPFARLVLDTASCYFMPPFSFQIRVGGLYLLYSLYYSQGAVPLEQIRLALKDWEDVTKFEKDAVDAQHFDVVFILHKLMSSKAILFTAMPITLVFTKKRKVETSALCEDFVERAARPQELVNADLLEELSNIHELYEDMKSAVTPQAECSMSLIRKDLASQLRSSVMDFHNWQQTKLSGVDEEEDSAEGTSSQMEASKRAELLASIKSKAFGEAAEMCKSRRHRQVEVDVPVSEAESQHASGSSRIIKPSLRSRTTENILISGELWNEALTGTTAISRNLSTLDSMSEEKPKKLKNFKWR*	GTGGCGTTTGGCTCTGTGAGACGTTACTGAGACGTTGGCAGCTCTCTGCTTCAATATGACTGAAGCACGGCAAAGAGGAACATCGCTGTCGTCTCATTTCATTTGTCCCTTGTGTTTCACAGTTCGTGAAGTCCTCTCGTGACGTCATTAAGGCTCGACTGTCTGCTGGGATTCCTGTCTGTTGCAGAGGCTGAGGCGGGAGACAGAGTGATGGATTTCTGCAGGCGGCACGTGAAGGCGGACTGCGAGGAGCTGCTGAGCCGCTTCAGGCGGACTCAGTCGGTCCGCTTCGAGATCTTCTCCGGGATCTGGAGGGACATGAAGTTCGCCTCCATCTTTTACGGCACCTTGTTCCACGAGAAGCGTCCCTTCGCTCGCCTGGTTCTGGACACCGCCTCC…
Q96DT6	2.30047	2.15704	0.0326373	sp|Q96DT6|ATG4C_HUMAN`Q96DT6`Q:1-482,H:1-458`57.87%ID`E:2e-162`RecName: Full=Cysteine protease ATG4C; EC=3.4.22.-; AltName: Full=AUT-like 3 cysteine endopeptidase; AltName: Full=Autophagin-3; AltName: Full=Autophagy-related cysteine endopeptidase 3; AltName: Full=Autophagy-related protein 4 homolog C;`Eukaryota; Metazoa; Chordata; Craniata; Vertebrata; Euteleostomi; Mammalia; Eutheria; Euarchonto…	GO:0005829^cellular_component^cytosol`GO:0005576^cellular_component^extracellular region`GO:0004197^molecular_function^cysteine-type endopeptidase activity`GO:0000045^biological_process^autophagic vacuole assembly`GO:0006612^biological_process^protein targeting to membrane`GO:0006508^biological_process^proteolysis	MENKGSDEVEKLKTKFYSGWNNVKYSWVLKSKTSFSRNSPVLLLGKCYHFKADDDDSPDEASCREPEDGFSMGNVEAFRKDFTSRVWLTYREEFPPLPGSTLTTDCGWGCLLRAGQMMLAQALVLHFLGRDWTWSEALTLQPLDTETWTTTAAKRLITSLKASLQGSPKISSRQSSEPQSSSHGSAEEAEAHLKEMYHRTIISWFGDTSSALLGLHRLVRLGLTFGKNAGNWYGPAVVAHILKKAVEEAMDSGLAGITAYVSQDCTVYSADVADCHKPPRARQESVSPPVAEGGPSKEDQAGSAPILPDSQAVIILIPVRLGGEKINPEYFEFVKNILSVEYCIGIIGGKPKQACYFVGFQDDSLIYMDPHYCQSFVDVSTGDFPLQSFHCPSPKKIPF…	ACCGCGAGATCATGTGATACGACCGCCTTACTTCCTCAAAGTGTAAACATTGGAGCTGGCAGACGAGTGTGAACTTACACAGTAGGTCATGAAGGAAGAAACACACCTAAAGCAGCGCGTCTGAAGCTGAAAAATTGCCGGTCGGAATCAGCTTTAAGGATCTGTTTGCGTTGTGGGAATGGGTTCCCTTCCTCGGTTTTCCAAATGGAGAATAAAGGGAGCGACGAGGTGGAAAAATTGAAGACGAAGTTCTATTCAGGGTGGAACAATGTGAAATACAGTTGGGTTCTCAAATCGAAGACTTCATTCAGTAGGAATTCCCCGGTGCTTCTGCTTGGAAAGTGCTACCACTTTAAGGCTGACGATGATGACAGTCCAGATGAAGCCAGCTGCAGAGAA…
Q7Z429	2.25046	0.88211	0.00831261	sp|Q7Z429|LFG1_HUMAN`Q7Z429`Q:26-344,H:43-371`63.44%ID`E:1e-110`RecName: Full=Protein lifeguard 1; AltName: Full=Glutamate [NMDA] receptor-associated protein 1; AltName: Full=NMDA receptor glutamate-binding subunit; AltName: Full=Putative MAPK-activating protein PM02; AltName: Full=Transmembrane BAX inhibitor motif-containing protein 3;`Eukaryota; Metazoa; Chordata; Craniata; Vertebrata; Euteleos…	GO:0016021^cellular_component^integral to membrane	MSHDKSGYPVMGDGNQPPNPNYYGPPQPGFAMPPPNYSQATGGPYPPAGGYGQPGFPQAGPGFAPGPYPPMGFPQMPYAQGPYQQGFGQAGFPGDPMGVPADSPAYHDDGPPSYGDNDEFKTGGFEDKMVRRAFIRKVFLVLTVQLLVTFSFVAIFTFSDNAKIFVRHNPWVYYTSYASFLVCLIALSCCGDFRRKYPGNMIALSILTLSLSYMVGMIASFYDTETVIIAVGMTAGVCFTVVLFSLQTKYDFTSCRGVLFVCLIVLMIFSILCIFIRNKIMHLVYASLGALLFTCFLAVDTQLLLGNKNLALSPEEYIFAALNLYTDIINIFLYILAIVGRSRE*	AAAAAAAAAAAAAACCCAAAAAAAGTGATCAAAACTTTTGCATAGAATACCAAATAAAGTTAGCAGTATTTTTGAAAGTCCATAGCTACTGTTATGTTAAAAAAAAGAAAATGGCCAACAAAATCCTGGAGGGACTGGCAGAGTGGTCAAACCTGAAGACAGATGATCACAGCCTGTCACTGCAACAGAGTAAAGAAAGGGTGTCCCCCTGCAGCTATATTTAACAACATGCTGCCCTCGTTTCCAAGTACGACTGGTAACCACGAGAGGGAATGAGGGGAGACGCTAAACTTGAGTGGAGGGAAATAACGCAACACATAAACAGGAAGCTCCTCATGAAGTCTTGACGGCGGGGAGCTCATTCGCGGGAGCGGCCCACGATGGCCAGGATGTAGAGGA…
O60218	2.24337	0.678544	0.0440215	sp|O60218|AK1BA_HUMAN`O60218`Q:1-117,H:200-316`64.1%ID`E:2e-41`RecName: Full=Aldo-keto reductase family 1 member B10; EC=1.1.1.-; AltName: Full=ARL-1; AltName: Full=Aldose reductase-like; AltName: Full=Aldose reductase-related protein; Short=ARP; Short=hARP; AltName: Full=Small intestine reductase; Short=SI reductase;`Eukaryota; Metazoa; Chordata; Craniata; Vertebrata; Euteleostomi; Mammalia; Eut…	GO:0005576^cellular_component^extracellular region`GO:0005764^cellular_component^lysosome`GO:0004033^molecular_function^aldo-keto reductase (NADP) activity`GO:0045550^molecular_function^geranylgeranyl reductase activity`GO:0047718^molecular_function^indanol dehydrogenase activity`GO:0001758^molecular_function^retinal dehydrogenase activity`GO:0006081^biological_process^cellular aldehyde metabolic…	CHSKGISVTAYAPLGSPERPWATSDDPSLLENATIKAIAAKYKKTAAQVLMRFHTQRNVIVLAKSITPSRIIENIQLFDFELSEDDMKKILGLNKNWRGFPAEWATKHKDYPFGTEF*	GCTTCCTAAAAAACATGTTTACTTGTTTATTGAATGTTTAAATGCAGAAAATATAAAAATATCAGTGAATAAGTGCAAGAGTTACTGGAGCTCCGTTTACAAAAGTGTGCCATTTTGATAACTGTTTGATAACAATGTAGACTTAAGCAGTTAAAGAAGTCCACAGGAAAGCTTGTGATTGAAGAAGAGCTAAAATTCAGTGCCAAAGGGGTAATCTTTGTGTTTTGTAGCCCACTCTGCTGGAAATCCTCTCCAGTTTTTGTTCAGGCCCAGGATCTTCTTCATGTCGTCTTCACTCAACTCAAAGTCAAACAACTGGATGTTTTCAATGATACGGCTGGGTGTGATGGACTTGGCGAGGACGATCACATTTCTCTGGGTGTGGAACCTCATGAGAAC…
Q2YDK1	2.24182	2.40595	0.0492007	sp|Q2YDK1|I20L2_BOVIN`Q2YDK1`Q:17-321,H:12-345`47.95%ID`E:4e-67`RecName: Full=Interferon-stimulated 20 kDa exonuclease-like 2; EC=3.1.-.-;`Eukaryota; Metazoa; Chordata; Craniata; Vertebrata; Euteleostomi; Mammalia; Eutheria; Laurasiatheria; Cetartiodactyla; Ruminantia; Pecora; Bovidae; Bovinae; Bos.	GO:0005730^cellular_component^nucleolus`GO:0004527^molecular_function^exonuclease activity`GO:0003676^molecular_function^nucleic acid binding`GO:0090305^biological_process^nucleic acid phosphodiester bond hydrolysis`GO:0042254^biological_process^ribosome biogenesis	MSNITINMCSDVTTQREHPPKKQNLKSKNFHKKMRHLEAKGYLRGKQNRNHNPRDVQGGQTLRQNGSYQKASTLPPPSASHNRTLPHPHGAYSFKSQLFGSTHSLPSTTSTVNKSDDHKKPKELLSTKAQTSGPSTSSHKPCTKATGNPNKYLAIDCEMVGTGPKGSISQLARCSIVSYEGDVIYDKYINPAMPVTDYRTRWSGIRPRDLIKATPYSEARKEILKLLMGKVIIGHAIHNDFKALSYFHPTVLTRDTSKIPLLNVKAGFGAKECVSLKRLTKALLNRDIQNKKGHSSVEDAKATMELYKVVEGEWEKTLLSNSVAS*	CAACCATACAAACAAAAAGCATATTTCAATAACATGTAACACCAGAACTGAAGGGTGAATAAAAAATGTTTAATTCTCAACCTTTCACGACTCTTCCACTCTGTTACAATAATCCCAGTGTTGTCAATGTAATAAAGTCATTTTAAGACCTCAAAAATATTTTGACAATAATGTGTTAGTAAACAAGCAGAGAAAAAAGAGGAAATTATTGTAAAAACCACAGGAACATAAACAACCTCAAAAAAGCTCTGGAACACAACAGAGTTTACAAACTGAAAATACATTAAACTTGCAAGCCATAAAAACACAAATATTCACTCAAATCTACGACTATTATTTTATTTCAACATTAAAGATTGAAAATAATTTGAGCTGGTTTTGCTACTGTCTTTTCCCACA…
Q9ULU8	2.23562	1.27701	0.0130601	sp|Q9ULU8|CAPS1_HUMAN`Q9ULU8`Q:1-460,H:196-655`89.37%ID`E:0`RecName: Full=Calcium-dependent secretion activator 1; AltName: Full=Calcium-dependent activator protein for secretion 1; Short=CAPS-1;`Eukaryota; Metazoa; Chordata; Craniata; Vertebrata; Euteleostomi; Mammalia; Eutheria; Euarchontoglires; Primates; Haplorrhini; Catarrhini; Hominidae; Homo.	GO:0030054^cellular_component^cell junction`GO:0030659^cellular_component^cytoplasmic vesicle membrane`GO:0005829^cellular_component^cytosol`GO:0045202^cellular_component^synapse`GO:0005509^molecular_function^calcium ion binding`GO:0005543^molecular_function^phospholipid binding`GO:0050432^biological_process^catecholamine secretion`GO:0006887^biological_process^exocytosis`GO:0045956^biological_pr…	MVQSGGCSASDSREVFKKHIEKRVRSLPEIDGLSKETVLSSWMAKFDTIYRGEEDPRKLQQRLTASAASELILSKDQLYEMFQGILGIKKFEHQLLYNACQLDNPDEQAAQIRRELDGRLQMADQIARLGGRFPRFASREMEAMFIEELRSSVNLLMANLESMPVSKGGEFKLQKLKRGHNTSIMDMGQEDESTLSKSDVVLSFTLEVVIMEVQGLRSLAPNRIVYCTMEVEGGHKLQTDQAEASKPTWGTQGDFTTTQPLPAVKVKLFTESTGVLALEDKELGRVVLHPTPNSAKQCELHKMSVSKGCSDELKIKLAIRMDKPQNMKHCGYLWAIGKNVWKRWKRRFFVLVQVSQYTFAMCSYREKKAEPVELLQLDGYTVDYTDPQPGLDGGRTFFN…	GCGCGTGCACGCGGCATGCTCAGGTGATCACAGCCTTAAACACCTGAAGGCAGAGGCCGGGAAACCCCGCACATTCACTCGCGCGCTTCTTTAAACTTAAGCTGAAGTCAGATCAGTAAACTGCAGCTGCAGACCATCAAGGATCGTTTTCAGGCTTTCCTCAACGGAGACACTCAGATTGTGGCTGACGAGGCCTTCATCAATGCAGTCCAGAGCTACTATGAGATCTTCCTGAAGAGCGACCGCGTGTCCCGGATGGTGCAAAGCGGCGGCTGCTCGGCCAGCGACTCCCGGGAGGTGTTCAAGAAGCACATAGAGAAGCGCGTGCGCAGTTTGCCCGAGATCGACGGCCTCAGTAAGGAGACGGTGCTGAGCTCTTGGATGGCCAAGTTCGACACC…
P23763	2.22704	1.52651	0.0375596	sp|P23763|VAMP1_HUMAN`P23763`Q:7-88,H:6-105`44%ID`E:9e-19`RecName: Full=Vesicle-associated membrane protein 1; Short=VAMP-1; AltName: Full=Synaptobrevin-1;`Eukaryota; Metazoa; Chordata; Craniata; Vertebrata; Euteleostomi; Mammalia; Eutheria; Euarchontoglires; Primates; Haplorrhini; Catarrhini; Hominidae; Homo.	GO:0030054^cellular_component^cell junction`GO:0030666^cellular_component^endocytic vesicle membrane`GO:0005887^cellular_component^integral to plasma membrane`GO:0005741^cellular_component^mitochondrial outer membrane`GO:0043005^cellular_component^neuron projection`GO:0030672^cellular_component^synaptic vesicle membrane`GO:0007269^biological_process^neurotransmitter secretion`GO:0016192^biologica…	MAEQNPQPPASGSSGKLDQVQSQVNEVKDILKDNIDKVLERGDRLNDLIDKTDDLQASADSFQRTSTRVARKYWWKNIKMMIVIGVIVLVVVILIILAATKVI*	AAAACACAGGGGATTCCTATATTTCTTAGTATTTCTTCTAGCGAGTTTGTTTTTCCCGCATGACTGACGGGTTTCGTTTCTTTTGTTTCGCAGGTTTGAGTGATGAAAGTCTGCCGAGTGCTGGAGGAGCGTTGACCAGAGCCACGATCCAGCAGCAGTCATTACGTAGAGATAGACCGTCTAAAAACAAAAACAGAGGCCTACATTTCCTCTATATTTACATAAATATTTCAGTGTTCTGCATTTGTTTAGATGGCTTTAAAGTTTTAGCATTTCTTTGTTCCTCCTTTTCTGTTAAGTTCTCAACTGTTGCTTCATTTCGTCCGTTACTAAAGTGTATTGTTGGTTGCTACAAATCACACAAACAGAACATGTGTACGCGAAGTTTCAGCATTTTTT…
P97615	2.18646	4.26338	0.0317738	sp|P97615|THIOM_RAT`P97615`Q:27-197,H:1-166`58.48%ID`E:2e-50`RecName: Full=Thioredoxin, mitochondrial; Short=MTRX; Short=Mt-Trx; AltName: Full=Thioredoxin-2; Flags: Precursor;`Eukaryota; Metazoa; Chordata; Craniata; Vertebrata; Euteleostomi; Mammalia; Eutheria; Euarchontoglires; Glires; Rodentia; Sciurognathi; Muroidea; Muridae; Murinae; Rattus.	GO:0030425^cellular_component^dendrite`GO:0005739^cellular_component^mitochondrion`GO:0043025^cellular_component^neuronal cell body`GO:0005730^cellular_component^nucleolus`GO:0009055^molecular_function^electron carrier activity`GO:0015035^molecular_function^protein disulfide oxidoreductase activity`GO:0045454^biological_process^cell redox homeostasis`GO:0031669^biological_process^cellular respons…	KKKKKKKSEVLPWSARPSSRELQHEKMAHRLLIRRVWTLSVKDIRCLPSSAATISSSSFSTSLQSPPSRVSLLSPPRTLPRTLHQISRREVSFNVQDNEDFTERVINSQLPVLVDFHAQWCGPCKILGPRLEKAIAKQKGRVAMAKVDIDEHTDLAIEYGVSAVPTVIAMRGGDVVDHFVGIKDDDELDSFVSKVIGQ*	AGGGTGAACATCTTGACGTCTTTATTACTTCATCTGGTCATGATTCCGGTACACAGATCTCATTTAAGTCATAAACTGAAATCAAACTCACATCTGTAATTTCCAACAGACCTCAGTTTCCCAAACACACACACAGTCAAACATCCTCCTCACATTGATAGGCATAAATGGTGTAAAAGTGACCCCGTGTGGCGTAGTCGTGTTTGACAGACGCCACGCCATCGTGTGGGCTAAAGTATCATTCAGTAAAGTCAGGTTTCCCAGAAGCTCAGTTTCTTCCTCACAGTACACACAACAGCTTTTATTTAGCTTTTACGTACATTAGTTACCGATTCACAGAGCTGCTTCTGAATGCAGCAAAAGCCTAAAGTAAAACGCAGCCGGAGGCTCACACCCATC…
Q5DU56	2.18052	0.891148	0.00830341	sp|Q5DU56|NLRC3_MOUSE`Q5DU56`Q:302-733,H:114-533`25.93%ID`E:4e-27`RecName: Full=Protein NLRC3;`Eukaryota; Metazoa; Chordata; Craniata; Vertebrata; Euteleostomi; Mammalia; Eutheria; Euarchontoglires; Glires; Rodentia; Sciurognathi; Muroidea; Muridae; Murinae; Mus; Mus.	GO:0005737^cellular_component^cytoplasm`GO:0005524^molecular_function^ATP binding`GO:0007249^biological_process^I-kappaB kinase/NF-kappaB cascade`GO:0032088^biological_process^negative regulation of NF-kappaB transcription factor activity`GO:0042110^biological_process^T cell activation	MDEGAGANTFSHGGNYDEEKEKWERPPSSYGSMKSESEESEDLERDKDGAEQEGAVLPERPAPVVMGSQIYQSPETLYTMNTEQTKPPGALVIETGSGDLDMAVDDYEDDEDEEDEDLYVTNSPEPPEPAVFEGLMQSDEGEQPGRLPTEQDMPFVFTNILKTLTPLKFEEMYKFRSWLKLTARDLKDTDFMEGDLLNFVDKMIEVLGHFKTLHFTISCLDSSGMKAEAAQLQKVCMKALIRYRLTEEINRKKKFVFEGLVESRSQNSLNQIFVEPKISTRICGAIDPSHEFRSKPITPLEVPDPESFTLLKNLFRLTKDDGTPVRTVATTGIPGSGMTLHTSKFCLDWAETTANRDLECIIRLPFHRFWSLKKSDSEDVSLLGMINNCTSAFKNLECY…	AACTCTTTATTCCCCCTATAAAATCCACATCCTTTAGGCACAAATAAGGCAAACGAATGTGACAGACATTTAGTAATTTAGATTAAATAGAATTAACCAAGTAGTATAACAATACACTGACTAATCATTTTGTACATTCAAAGAGTGTGCAACTACATAAAAAATATGTAATTCTGAAAAAGCATGCAGAAATAATCCCTTTTTTCATTAAAAAAAAAAAAAAAACATTCTATCTTTGCAATCATCCACATTGTTTTCAGGACTTTCCACTTTAACATCGTGCTCTGGTTTTTAATTACAAGCATAGAATAAAGAACTGAGATTTTAAACCTGGATCTGTTCCCTTTCTTTTTTCGTGGTGTTAGGATAATAATGATGGGGAGAGAACACAAATTGCTC…
Q8NG04	2.17719	1.58607	0.0498189	sp|Q8NG04|S2610_HUMAN`Q8NG04`Q:1-585,H:42-540`43.97%ID`E:3e-121`RecName: Full=Solute carrier family 26 member 10;`Eukaryota; Metazoa; Chordata; Craniata; Vertebrata; Euteleostomi; Mammalia; Eutheria; Euarchontoglires; Primates; Haplorrhini; Catarrhini; Hominidae; Homo.	GO:0016021^cellular_component^integral to membrane`GO:0015297^molecular_function^antiporter activity`GO:0015116^molecular_function^sulfate transmembrane transporter activity`GO:0008272^biological_process^sulfate transport	MAFALLTSVAPIFGLYTSFFPVVLYMIFGTGHHVSTGTFAVVSLMTGSVVEQLVPTPLEMNSSSPEAASFEAERIGVASAVALLSGIFMICMFALHLGFLSTYLSEPIVKAFISAAAFHVTISQLQSMLGLRLPRHTGNFSFFKTLVSVMENLPHTNTAELIISLVSLAVLVPVKEINVRFRHRLRTPIPVEILTVIIATCVVYASSLDSIYNIEIVGDIPAGFPRPQLPAINTFPAIAGDTLAITFVGYALSVSLAMIYADKHGYSIQPNQELLAHGISNAVSAFFTCFPSSATLATTNILESAGGHTQLCGLFTSLVVLIVLLLIGPLFYFLPKAVLACINVTSLRQMLLQFQDLPELWRISRIDFMVWIVTWTSVVVLNVDLGLAIGVVFSMMTII…	TAGTTTCTATTAATTATATTGTACTTTTTGAAGAAAAATATTGCAATCCTTTTTTAATAGATACAGGGACACATCCACTCTGCTTTCAAATGATATAAATATCAGCAACACCAGCATACATATTTATTGTAACATAAAAAGAAATGCAATAAATATTACAGTGGAAACATTTCACAAGTGACAATAGTATTTTTTTATGCAAGAAAGCATAAACAGCAACAGGGAAAGTATTGTATTGTTCCCTGGGCTGCAACATGACAAAATGTGTGTCTTGTGCAATAATACATCTTGCTTATCAAGAGTGTGTCCAGCATCTGTAAATAAAGTGGTAACACTGTATTGCTTCTCTAGAATCAGAACAGGTTTAAGCAAGTGCTAGAATGCTCCTGCACAGTTGAC…
O46419	2.16636	0.893837	0.0462372	sp|O46419|LIPT_BOVIN`O46419`Q:34-316,H:28-308`51.59%ID`E:4e-88`RecName: Full=Lipoyltransferase 1, mitochondrial; EC=2.3.1.-; AltName: Full=Lipoate biosynthesis protein; AltName: Full=Lipoate-protein ligase; AltName: Full=Lipoyl ligase; Flags: Precursor;`Eukaryota; Metazoa; Chordata; Craniata; Vertebrata; Euteleostomi; Mammalia; Eutheria; Laurasiatheria; Cetartiodactyla; Ruminantia; Pecora; Bovida…	GO:0005739^cellular_component^mitochondrion`GO:0016746^molecular_function^transferase activity, transferring acyl groups`GO:0009249^biological_process^protein lipoylation	MLQLRRTLALLRGETGNQRARTGSTFPFLDSTDASSGLVLQSQSTDVYQNLALEDWIDAHVDLQQRGILLLWRNRPAVVIGRHQNPWSECNLPAMREMGIALARRRSGGGTVFHDHGNLNMTFFASKKAYDRKRNLKVVTEALRRLRPNLDIQATDRFDILLKGHYKISGTASRLSRKSSYHHCTLLHSADRSALSTVLRPSCPGIQSNATPSVPSPVANLIDHAPSLALEELLEALVQQYNTEFGFSSACTLVDPSDESAFPGVGTMAAELRSWDWTFGRTPKFRVETLLELRDEQPPARCSAQLQVEVKAGQVES	GCTCTCCACCTGTCCGGCCTTCACCTCCACCTGCAGCTGAGCGGAGCAGCGGGCGGGCGGCTGCTCATCCCTCAGCTCCAGCAGCGTTTCCACTCTGAATTTAGGCGTCCTGCCGAACGTCCAGTCCCAGCTTCGCAGCTCTGCCGCCATGGTGCCCACGCCGGGGAACGCGGACTCGTCGGACGGGTCGACGAGAGTGCACGCCGAGCTGAAGCCGAACTCTGTGTTGTACTGCTGCACTAGTGCTTCCAGGAGCTCCTCTAAAGCCAGAGAAGGTGCATGGTCTATCAGGTTGGCGACAGGTGACGGGACGCTTGGTGTGGCGTTACTTTGGATGCCGGGACACGAAGGGCGGAGCACCGTGGAGAGGGCGGAGCGATCGGCAGAGTGGAGGAGGGT…
Q99MZ6	2.15537	0.0596198	0.0497065	sp|Q99MZ6|MYO7B_MOUSE`Q99MZ6`Q:1-120,H:1803-1921`60%ID`E:1e-38`RecName: Full=Unconventional myosin-VIIb;`Eukaryota; Metazoa; Chordata; Craniata; Vertebrata; Euteleostomi; Mammalia; Eutheria; Euarchontoglires; Glires; Rodentia; Sciurognathi; Muroidea; Muridae; Murinae; Mus; Mus.	GO:0016324^cellular_component^apical plasma membrane`GO:0016459^cellular_component^myosin complex`GO:0005524^molecular_function^ATP binding`GO:0003774^molecular_function^motor activity	PNDTTETVEVATGTKVRDLIKSISKKLNLISADGYSLFVKAQDKVISLNETDYFFDSLRQITDWSKKSKQMKDAGGPVNIPYLVFFMRKLWFNVIPGKDSQADLIFHFPQELPKYLRGYH	CAGTGGTAGCCTCGCAGGTATTTTGGTAATTCCTGAGGGAAATGGAAGATCAGATCAGCCTGAGAGTCTTTGCCAGGAATCACATTAAACCACAGCTTCCTCATGAAGAACACAAGGTAGGGTATGTTGACCGGTCCGCCTGCATCTTTCATCTGTTTGGATTTCTTGGACCAGTCAGTGATCTGTCTCAGGCTGTCAAAGAAATAGTCTGTTTCGTTCAAGCTGATGACCTTGTCCTGTGCTTTGACAAAAAGGCTGTAGCCATCAGCTGAAATCAGGTTGAGCTTTTTGGAAATGCTTTTGATGAGATCTCTGACCTTGGTGCCGGTTGCCACCTCAACTGTCTCTGTTGTGTCGTTAGG
Q5VWN6	2.15471	0.070495	0.0462228	sp|Q5VWN6|F208B_HUMAN`Q5VWN6`Q:2220-2476,H:2163-2415`40.53%ID`E:1e-52`RecName: Full=Protein FAM208B;`Eukaryota; Metazoa; Chordata; Craniata; Vertebrata; Euteleostomi; Mammalia; Eutheria; Euarchontoglires; Primates; Haplorrhini; Catarrhini; Hominidae; Homo.	.	FDDASKAYALGETGVLAGNSTCTILGDPTKGIYISMYSDCLDQNRWYHGKSGYIAIIKLTKGKVKKVLENYTEKFTEPTVGFDCHVSEQLASVSAKTSSFLAFERTQYYIYELLDDGSNRTELSPAASCPFAVVSFSYTDTKATPFVQQEKSELGKQVCHHIPWRGKLQIGSKFYNVDLRSTARAFLPTTLPPVVKVDVASMSDVQRLLPRAVFETSFTDEAFFDNLYCTLCDLVLSEAEDSSSFDQLLLEIKERDLALTISLKEKGFLILLHSSHFLRYEDTEFTNAGLLQGVFVFPESLAIRPDTKPVVKGPAVSSEILQILPVLSYAESELEKTLMNQDQKLCDVLLEHMQSYATLINPGLATSPSRDVSMFPDQYDVAEAHRHIYSKPEWTCNAW…	GCAAGTTTTAAAAGTCAAAATTCTCAGGAAAACATTTAAATACTCAAGAATGTTACCAAATAATTTACAATATATACATAAAACAAGAGAATTAAAACAGCATAGCTGCCAACATATTGGCAAATCTGCCACACCTTCAATTAATTCCAGTTTTGCGATAAATTGACACTGAAACTAGAAAAAGATTAAATAAAAATACAATAAAAATCTACAAGCAGTACTGTTGTTTAACGAAAGTTTTTCGTTGAAATATAACTAAAGCAATAAAAAATAGGTGAATAAATTCATTCCACAACAACCACACTTAGAATTGTTGTTTGGTCACGTAGTCAAACTTTTGTCAGTTTGACACCTCTGATTTTAAAGGCAGTCACTTGAAAACTTTGTCAGGAAAGTGTT…
B5XAM2	2.15368	0.675442	0.048206	sp|B5XAM2|ICT1_SALSA`B5XAM2`Q:24-182,H:32-191`66.88%ID`E:1e-58`RecName: Full=Peptidyl-tRNA hydrolase ICT1, mitochondrial; EC=3.1.1.29; AltName: Full=Immature colon carcinoma transcript 1 protein homolog; Flags: Precursor;`Eukaryota; Metazoa; Chordata; Craniata; Vertebrata; Euteleostomi; Actinopterygii; Neopterygii; Teleostei; Euteleostei; Protacanthopterygii; Salmoniformes; Salmonidae; Salmoninae…	GO:0005762^cellular_component^mitochondrial large ribosomal subunit`GO:0004045^molecular_function^aminoacyl-tRNA hydrolase activity`GO:0016150^molecular_function^translation release factor activity, codon nonspecific`GO:0070126^biological_process^mitochondrial translational termination	MAACLTRRVCLLCISSRVHVSRGVKTTQIRDFSGSKGTPSSEDTKVHVPTERLTVTYSRSSGPGGQHVNKVNTKAEVRFHVHTADWIPEDIRQKVIEQNRNRMNKAGELLVSSELSRSQHRNLSDCLQKISAIIAEASEKPPEPTEEDIALRAARLKKRKEERLKQKKIHSQTKLSRRVDFD*	TTATCGATCTTGAATCTTGATATAATCTTATTCTTTATTTAGCAGAACATAAATACAATATTGTAAATTCACAAAATGAAAAATAAATACATTCTCAATCAAAGTCCACTCTTCTGCTGAGCTTGGTTTGAGAATGGATCTTCTTCTGCTTGAGGCGTTCTTCTTTCCTCTTCTTCAACCTGGCTGCTCGCAGAGCGATGTCTTCTTCTGTGGGTTCAGGGGGTTTCTCACTGGCTTCTGCTATGATGGCTGAGATCTTCTGCAGGCAGTCGGACAGATTTCGGTGCTGACTTCTGCTGAGCTCCGAGCTGACCAGCAGCTCTCCGGCTTTATTCATGCGGTTTCTGTTCTGTTCTATGACCTTTTGTCGAATGTCCTCAGGTATCCAGTCTGCTGTGT…
P11181	2.13653	5.36988	3.47084e-05	sp|P11181|ODB2_BOVIN`P11181`Q:13-498,H:11-482`71.31%ID`E:0`RecName: Full=Lipoamide acyltransferase component of branched-chain alpha-keto acid dehydrogenase complex, mitochondrial; EC=2.3.1.168; AltName: Full=Branched-chain alpha-keto acid dehydrogenase complex component E2; Short=BCKAD-E2; Short=BCKADE2; AltName: Full=Dihydrolipoamide acetyltransferase component of branched-chain alpha-keto acid…	GO:0015630^cellular_component^microtubule cytoskeleton`GO:0042645^cellular_component^mitochondrial nucleoid`GO:0048037^molecular_function^cofactor binding`GO:0043754^molecular_function^dihydrolipoyllysine-residue (2-methylpropanoyl)transferase activity`GO:0046949^biological_process^fatty-acyl-CoA biosynthetic process	MAAVTRSSYIFVSRLLSQHLCRRSFRLQNFRSSRTLQQITFRCSREPQVFSRRALHAASACCGPVVQFKLSDIGEGIMEVTVKEWYVKEGDKVSQFDSICEVQSDKASVTITSRYDGVIKKLYYDVDATALVGKPLVDIETESSSEVIQEEDVVETPAMAREEHTHQEIKGHKTQATPAVRRLAMENNIKLSEVVGTGKDGRILKEDILNFLAKQTGAILPPAPVQEIQTPPPSPPSTAAPVGRPVSTSTVAKAPPPRATPVFTGKDVTEPVKGFHKAMVKTMTAALKIPHFGYCDEVDLSRLVALRTELKPIAESRGVKLSYMPFFIKAASLGLLHFPILNASVDEDCQNITYRASHNIGLAMDTSQGLLVPNVKNVQLLSVFEIAQELNRLQALGTA…	GTTCACTATTTTAATGGAAACAAGTTATGTGAAAACTTTGTTCTCCACAATAAAACCCAAAAGTTGCTTTATAAATGCATTTTATTACATTTATTGAAACACAAATAAACAAAAACTAATACCCATAGAAATATATTCCTGTGCAGATGGTTCTTGTCAGTGACTGAGGAGAACTGGACTTTCTATTTCAAGGGTTGTAGAATTAAAGGTGTAATCTTCCTTCTATTACTCAGACGTTAGTATTTCATAAACCAGATCAAATAAAAATTACTTTATGAAAAAACAACAATACAAACAAACAAGTCAGCTCCACTGGGGCAGCAGTGAGGTTGTAATAGACAGCATTTTGTTTGTTTCAGGTCCAGTGACTGAGCTGGTGCACAAGAGCGAGATTTTACC…
Q9JJ09	2.10424	3.15712	0.0424856	sp|Q9JJ09|NPT2B_RAT`Q9JJ09`Q:10-582,H:35-611`68.98%ID`E:0`RecName: Full=Sodium-dependent phosphate transport protein 2B; Short=Sodium-phosphate transport protein 2B; AltName: Full=Na(+)-dependent phosphate cotransporter 2B; AltName: Full=Sodium/phosphate cotransporter 2B; Short=Na(+)/Pi cotransporter 2B; Short=NaPi-2b; AltName: Full=Solute carrier family 34 member 2; Short=rNaPi IIb;`Eukaryota; M…	GO:0016324^cellular_component^apical plasma membrane`GO:0031526^cellular_component^brush border membrane`GO:0016021^cellular_component^integral to membrane`GO:0042301^molecular_function^phosphate ion binding`GO:0031402^molecular_function^sodium ion binding`GO:0015321^molecular_function^sodium-dependent phosphate transmembrane transporter activity`GO:0005436^molecular_function^sodium:phosphate sym…	PRPQVETDSSSASKDDKSKFKDKELPPAYSTLELVNEPKEEDPWDLPELKDTGIKWSELDTKGKVMRVLSAIVKLALLLGLLYLFICSLDVLSSAFQLVGGKAAGDIFQDNAVLSNPVAGLVIGVLVTVLVQSSSTSSSIVVSMVSSGLLDVKSAVPIIMGANIGTSVTNTIVAMMQAGDRNEFRRAFAGATVHDFFNWLSVLILLPLEAATGMLFKLTLLIIDSFNLESGEDAPDLLKVITDPLTKSIIQLDKSVIADIATGVPEARNKSLIKRWCKTEMNTTFWNETVGVCPAGSVCWEEGNQTVTQMNQTWTNNLERCKHIFANIQWSDLAVGLLLLALSLLVLCMCLILIVKLLNSMLKGQVAVVIKKVLNTDFPFPFGWVTGYIAILVGAGMTF…	AAACATTAAAATGAACTTAAATACAGAGAAATACATTATGTAAATAACATTACATTTTACATGCTACATTGGTGGAAATGTATAGAATTGGACATAAACCCAAAGTGCCTTCCACACATGATATCCTATAAAAATACAAGTTTTCAGTCACCCAAATGTGCAGCAGCAGTCAGAATGTGCACCTCGTGTCCACACCTCCCAGCTGAGAATGTCAGCATAAAATCAAGAGCAACCACAAAGCCCATAATTACAGTTACGTTACAGATCGCTGTACTCTGCACACACAGCTAACTCAGCATCGTTAGAAATTTGTGTTCTCTTCTTTCTTGTCTCCATCCATGGACAGAGCAGGATTGTCGTGCCCCTCTAGACTCTTGCTGCTCCTCCTGGAGACCTCGC…
Q5R514	2.09496	5.56564	0.0283581	sp|Q5R514|UMPS_PONAB`Q5R514`Q:3-479,H:5-475`61.25%ID`E:2e-174`RecName: Full=Uridine 5'-monophosphate synthase; Short=UMP synthase; Includes: RecName: Full=Orotate phosphoribosyltransferase; Short=OPRTase; EC=2.4.2.10; Includes: RecName: Full=Orotidine 5'-phosphate decarboxylase; EC=4.1.1.23; AltName: Full=OMPdecase;`Eukaryota; Metazoa; Chordata; Craniata; Vertebrata; Euteleostomi; Mammalia; Euthe…	GO:0004588^molecular_function^orotate phosphoribosyltransferase activity`GO:0004590^molecular_function^orotidine-5'-phosphate decarboxylase activity`GO:0006207^biological_process^'de novo' pyrimidine nucleobase biosynthetic process`GO:0044205^biological_process^'de novo' UMP biosynthetic process	MDGVSVESLILKLHDVNAVKFGEYKLKSGLMTPIYIDLRVLVSHPGLMNQVSSLIYQRVKEEGLQFGLVCGVPYTALPLATIICSTHELPMLIRRKEAKDYGTKKMVEGSFCEGDTCLIIEDTVTSGSSILETADVLLKEGLKVTDAVVLMDREQGGTEMLASRGIRLLPVISMFKLLDVLLAAGRIDGPTAQSVRRFIQDNNTFRPKKENGGAVPAPKKACLDLNREQSYAERAQLPNVHPLACKLLKIMEEKQSNLCVSADVTSGEELLRLAESLGPKICVLKTHVDILKDFTLDFSQKLQAVADQHNFLIFEDRKFADIGNTVKHQYEGGVYQISSWSHIVNAHAVPGPGVVRGLSAVGKPLGRGCLLIAQMSSSGSLATGGYTTAAVQMAEEHSD…	GTCAGAAAAAGTACAGAAAAGAGTTTATTCAACAGCTTGTTTTCAGTTTTTCATGAAGAACACGGACGGCACTCTGACAGTCTGGATGTCATCATCTGAGGGAGAGGACATCACACGCATGAATCCTGGGACACATGCACTCACGCCTTCCATGACCTTCCATGACCTTCCTTTGACCCCGACAGATGACCAGGAGGAGGAGCAGACATGCACCAAAGACCTGCTGATCCAACACGGATGATCAAAGAAGAATCAAACATTCACACACGAAAGAGGCGGAGAAAACACTGATTGCATCTTTTTAACGGAGGAAGGAAATGTCTGGACCCTGAGGAGAAACGGAGCAGGAAATTCACACAACTCCACAAAAATATCACTAGATTGAGTGATCACAGTCTG…
O94915	2.07628	3.29502	0.0184484	sp|O94915|FRYL_HUMAN`O94915`Q:1-1720,H:1333-3013`69.23%ID`E:0`RecName: Full=Protein furry homolog-like; AltName: Full=ALL1-fused gene from chromosome 4p12 protein;`Eukaryota; Metazoa; Chordata; Craniata; Vertebrata; Euteleostomi; Mammalia; Eutheria; Euarchontoglires; Primates; Haplorrhini; Catarrhini; Hominidae; Homo.	GO:0006355^biological_process^regulation of transcription, DNA-dependent`GO:0006351^biological_process^transcription, DNA-dependent	DEEEEEEDREVVMVNSRRWLRGEGWGSPRATTMVLNNLMFMTAKYGDEFAWSEIENVWTTLADSWPKNLKIILQFLISMSGVSSDPSLLPYVKRVVVYLGRDKTMQLLEELMCELEMTDPVSSAITHMDNPPYYRITSSYKIPSVTSGTTSSSNTMVPGNDGHHDSKLKDPNMEESYTHLDIYSGLNSNLNRQHHRLESRYSSSSGGSYEDEKSDSMPLYANWRLKVMEHNQPEALPFPPSGGCWSPLVDYLPETNTPAVPLHRCNIAVILLTDLIVDHGVKVEWSAYLHLLLHAVFIGFDHHHPEVYEHCKRLLLHLLVVQASSSSVQSVAMVLLGNRDCNDPKVLTVKPAPRELKLTVSTGTREILTDFQPSPMTDSGLSSSSTSSSISLGGGGGAL…	GGATGAGGAGGAGGAGGAGGAGGACCGGGAAGTGGTGATGGTCAACAGTCGCAGGTGGCTCCGAGGAGAGGGCTGGGGGTCTCCTCGTGCAACCACCATGGTGCTAAACAATCTCATGTTCATGACTGCAAAGTACGGAGATGAGTTTGCCTGGTCAGAAATCGAGAATGTTTGGACAACTTTAGCAGACAGCTGGCCAAAGAACCTCAAAATCATCCTGCAGTTCCTCATCAGCATGTCCGGAGTCAGCAGTGACCCCAGCCTTTTGCCCTATGTGAAACGCGTGGTGGTTTACCTGGGCAGAGATAAGACTATGCAGCTGTTGGAGGAGTTGATGTGTGAGCTGGAGATGACGGATCCGGTCAGCTCAGCCATCACACACATGGACAACCCTCCTTA…
Q9YGC1	2.07598	1.98792	0.0189362	sp|Q9YGC1|BLNK_CHICK`Q9YGC1`Q:217-328,H:440-550`53.57%ID`E:6e-29`RecName: Full=B-cell linker protein; AltName: Full=B-cell adapter SH2 domain-containing protein; AltName: Full=Cytoplasmic adapter protein; AltName: Full=Src homology 2 domain-containing leukocyte protein of 65 kDa; Short=SLP-65;`Eukaryota; Metazoa; Chordata; Craniata; Vertebrata; Euteleostomi; Archosauria; Dinosauria; Saurischia; T…	GO:0005829^cellular_component^cytosol`GO:0005886^cellular_component^plasma membrane`GO:0042113^biological_process^B cell activation`GO:0035556^biological_process^intracellular signal transduction	MKMTFFGKLKNLNAGPPAPPRRPGNSGFDWPQDEFTDDEEGDMYEAPPCERPAVKVPQTQVQDNIYLERTTNPGIPKREAAPLPPQAPKNMKRQQRQDLINDMKKPPEVDRNDKPGRKKMMPPPPPPVSESNEEDVYLDPNQEPEENDDLYLEPEAACSPGPRAPMRKPPSPSTAAVPMPMAKPPIPGGKSSSMFPPVIDRKTGGMRVNKPLRDEDKEWFAGDCTRKTAEDFLERVNKDGAFLIRHSSDQRTSQPFTLAVLYQQKVYNIPIRFLEDVQGYALGKEGKTNEETFSSLDEMISHHKKNKLLLIDSKSQAKHSVHLTYPGRP*	CGGGTCGTTTCTGATGTGCGTTTCATTTAGAGGAAGACAGTGTGACAGCAGGTGTGGTTGTCGGTCTGTCTGCTGTTTCAGGACCCGAGCAAAGACTTCCTCATGGCTTAATCGCTGGTCAGGCTGGACCTCAAATCATGAAAATGACCTTTTTTGGAAAACTGAAGAACCTGAACGCTGGACCTCCAGCTCCTCCCAGACGGCCAGGCAACTCTGGATTTGATTGGCCACAAGATGAGTTTACGGATGATGAGGAAGGGGACATGTATGAAGCCCCTCCCTGTGAGCGTCCGGCAGTCAAAGTGCCACAGACCCAAGTACAGGACAACATTTATTTGGAGAGGACGACCAACCCAGGTATTCCCAAGAGGGAGGCTGCTCCTCTACCTCCCCAAGCAC…
Q9Y2T3	2.05707	0.102258	0.0388013	sp|Q9Y2T3|GUAD_HUMAN`Q9Y2T3`Q:14-339,H:8-333`61.04%ID`E:2e-122`RecName: Full=Guanine deaminase; Short=Guanase; Short=Guanine aminase; EC=3.5.4.3; AltName: Full=Guanine aminohydrolase; Short=GAH; AltName: Full=p51-nedasin;`Eukaryota; Metazoa; Chordata; Craniata; Vertebrata; Euteleostomi; Mammalia; Eutheria; Euarchontoglires; Primates; Haplorrhini; Catarrhini; Hominidae; Homo.	GO:0005829^cellular_component^cytosol`GO:0008892^molecular_function^guanine deaminase activity`GO:0046872^molecular_function^metal ion binding`GO:0008270^molecular_function^zinc ion binding`GO:0006147^biological_process^guanine catabolic process`GO:0007399^biological_process^nervous system development`GO:0006144^biological_process^purine nucleobase metabolic process`GO:0006195^biological_process^…	SGARMINSEGSSGPVAQVFRGTFIHSTPQTALQVLEDALLGVDSAGKIAFIGKGENVLELSQKFGFNPSEVIKLAQHEFFMPGLIDTHIHASQYSYAGTALDMPLLKWLNTYTFPVESHFKDLEFARKVYTQVVKRTLRNGTTTACYFATIHTDASLLLGQIANDFGQRALVGKVCMDRNDSVEHYRETLQESVDETHRFIKELLNKKYPLVKPVVTPRFAPSCTEALLKQLGTIAKNNNLHIQSHISENIDELELVKNLFPDSETYTDVYHKFNLLTDKTIMAHGCHLSDKELTVFRETGTSLSHCPNSNFSLCSGILDARNVLNHKVKLGLGTDVAG	TCCGGAGCGAGAATGATAAACTCGGAGGGTTCCAGCGGCCCAGTGGCGCAGGTTTTCAGGGGGACATTTATCCACTCGACCCCACAAACAGCGCTGCAGGTCCTGGAGGATGCGCTCCTGGGAGTGGATTCTGCTGGGAAGATTGCTTTCATTGGAAAAGGTGAAAACGTACTGGAACTGTCTCAGAAGTTTGGGTTCAACCCATCAGAGGTCATTAAACTGGCACAACATGAATTCTTCATGCCAGGATTGATTGACACCCACATCCATGCGTCCCAGTACAGCTACGCCGGCACAGCCTTGGACATGCCTTTACTGAAGTGGCTCAATACTTACACATTCCCTGTAGAATCACACTTCAAGGACTTGGAATTTGCTCGGAAAGTCTACACTCAAGTC…
Q91684	2.0339	0.0102225	0.0289767	sp|Q91684|DPOG1_XENLA`Q91684`Q:1-308,H:894-1200`78.57%ID`E:1e-143`RecName: Full=DNA polymerase subunit gamma-1; EC=2.7.7.7; AltName: Full=Mitochondrial DNA polymerase catalytic subunit;`Eukaryota; Metazoa; Chordata; Craniata; Vertebrata; Euteleostomi; Amphibia; Batrachia; Anura; Pipoidea; Pipidae; Xenopodinae; Xenopus; Xenopus.	GO:0005760^cellular_component^gamma DNA polymerase complex`GO:0042645^cellular_component^mitochondrial nucleoid`GO:0003682^molecular_function^chromatin binding`GO:0003677^molecular_function^DNA binding`GO:0003887^molecular_function^DNA-directed DNA polymerase activity`GO:0006261^biological_process^DNA-dependent DNA replication	KKSQGTDLHSRTAEAVGISREHAKVFNYGRIYGAGQPFAERLLMQFNHRLNQTEAASKAKQMYALTKGIRRYHLSEEGEWLVNELGFDVQREEDGSVSLQELRRISKVASQSSRRKKWDIVGKRVWAGGTESDMFNKLESIAHSAQPATPVLRCRISRALEPKAVRNEFITSRVNWVVQSSAVDYLHLMLVAMKWLFEEHDIDGRFCISIHDEVRYLVRSEDRYRAALALQITNLLTRSVFAHALGLQDLPQSVAFFSAVDIDQCLRKEVVMDCVTPSNPTGVERRYGLPSGEALDIYQIINITGGSLDKGR*	GAAGAAGAGTCAGGGCACAGACCTTCACAGCCGCACTGCTGAGGCTGTGGGCATCAGCAGGGAGCATGCGAAGGTCTTCAATTACGGGCGCATCTATGGTGCAGGACAGCCCTTTGCTGAGAGATTGCTGATGCAGTTCAACCATCGCCTTAATCAGACGGAAGCTGCCAGTAAGGCCAAGCAGATGTACGCCTTAACCAAGGGTATACGGAGATACCATCTGTCAGAGGAGGGTGAATGGCTGGTGAACGAACTGGGTTTTGACGTGCAGAGGGAGGAGGATGGAAGCGTCTCTCTGCAGGAGCTGAGGAGGATTTCTAAAGTGGCTTCACAGTCCTCTCGGCGGAAGAAGTGGGATATTGTTGGTAAGCGCGTCTGGGCTGGAGGCACAGAGTCAGA…
P19493	2.02665	1.99324	0.0096168	sp|P19493|GRIA4_RAT`P19493`Q:1-628,H:171-797`90.61%ID`E:0`RecName: Full=Glutamate receptor 4; Short=GluR-4; Short=GluR4; AltName: Full=AMPA-selective glutamate receptor 4; AltName: Full=GluR-D; AltName: Full=Glutamate receptor ionotropic, AMPA 4; Short=GluA4; Flags: Precursor;`Eukaryota; Metazoa; Chordata; Craniata; Vertebrata; Euteleostomi; Mammalia; Eutheria; Euarchontoglires; Glires; Rodentia;…	GO:0032281^cellular_component^alpha-amino-3-hydroxy-5-methyl-4-isoxazolepropionic acid selective glutamate receptor complex`GO:0030054^cellular_component^cell junction`GO:0032983^cellular_component^kainate selective glutamate receptor complex`GO:0043025^cellular_component^neuronal cell body`GO:0014069^cellular_component^postsynaptic density`GO:0045211^cellular_component^postsynaptic membrane`GO:0…	MEKAGQNNWQVSAICVENFNDANYRRLLEDLDRRQEKKFVIDLEAERLQNMLEQIVSVGKHVKGYHYIMANLGFKDINLERFMHGGANVTGFQLVDFSNPMVIKLMQRWNKLDQREYPGSDAPPKYTSALTYDGVMVMAEAFRNLRRQKVDISRRGNAGDCLANPAAPWNQGIDMERTLKQVRLQGLTGNVQFDHYGRRVNYTMDVFELKNNGPRRIGYWNDADKLVLIQDSPLLPNDTTGMENRTVIVTTIMEGPYVMLKKNWEMYEGNDQYEGYCVDLASEIAKHIGIKYKISIVPDGKYGARDPETKIWNGMVGELVYGKAEIAVAPLTITLVREEVIDFSKPFMSLGISIMIKKPQKSKPGVFSFLDPLAYEIWMCIVFAYIGVSVVLFLVSRFS…	GGAGAGGGGATGTTACTTAGAGAGGCACGCGGAAGAGACGTTGGCGACGTACCGCGCTTTTCAAGTAAACGCGGGAGAGCCTGGACTGACAGAGCGCTGCAAGGTTTCTCCATCCTCCAAGTTCTGCGGACAGCAGTTCCTGTAGATCCATGACCAGAAGATTGTAGATGAAGACGCAGCAGCACCTCAGTCAACATTCACGGTCCTTTCAGGCGGTCTGTTCATCAGAAACACGGATCAGGAGTACACGGCCTTTCGGCTGGCCATCTTCCTGCACAACACCAGCCCCAACGCTTCGGAAGCCCCGTTCAACCTGGTGCCTCACGTGGACAACATCGAGACAGCCAACAGCTTCGCCGTCACCAACGCCTTTTGCTCGCAGTACTCCCGCGGCGTCTT…
Q9D2Y4	2.01815	0.31217	0.0242318	sp|Q9D2Y4|MLKL_MOUSE`Q9D2Y4`Q:23-466,H:1-446`35.84%ID`E:1e-66`RecName: Full=Mixed lineage kinase domain-like protein;`Eukaryota; Metazoa; Chordata; Craniata; Vertebrata; Euteleostomi; Mammalia; Eutheria; Euarchontoglires; Glires; Rodentia; Sciurognathi; Muroidea; Muridae; Murinae; Mus; Mus.	GO:0005524^molecular_function^ATP binding`GO:0004672^molecular_function^protein kinase activity	SHLTLIEIPAYSDCPRSCKTIAMDFIEPILSVVKCIYDLVEEVQANKKRSQRICDRVKALEKIIRSIQTEKKVVETENVKSIIKDLSITLDSTRNLLAKHASSNWMKRAIKKGYYEEEFNHVNERLNDAFQALTLALNVQHDAAVCEVFDIVVQQKQDEEDRRKDEEELLEMMTSMQSDVTEILALLKMQKMPYEEIRKIKLSELKFIPDFPKKPFMMTESAENYKGEFQGFPVVIKKYLNTGPVSSSEVETIFKKETDTMNRFQSPNILRLFGICINNENSPQAEFLVVMEYCEKGSLREVLGSDCQLSWTRKAHMCLDVAQGIYRLHQAEQNFKVHGSISSSKFLVDEAYRVKLGGFELSKTETSLQKSVIKSTQESTLCYAAPEMLDNLNNKFTKE…	CTGAACGCAGCTCTAGGCTGCACGTCTGATTCCTCTGTCTCACTGCTCCAGCTGGGCCACCACCAAGCGCAGTTTATCCATGAGCACACCAGCTGATGGTCGGTCAAAGCTGCTGTAAGCCCGGCAGGCGTTGATTATCTGCTGGAGATTTTCAGGACAATCAGGTGGAAGTGGCTCTTGATATTTTTCCATGCAGACTTTTTTATAAAATGTCTTGTTATCTAAACCATCAAATGGTTTCTTCCGAGTTGCAATTTCCCACAGAACAATCCCGACGCTGTAGATCTCACACTCTTTGGTGAATTTGTTGTTGAGGTTATCCAGCATTTCAGGAGCGGCGTAGCACAGAGTTGACTCCTGCGTGCTTTTTATCACAGACTTTTGAAGCGATGTCTCCGT…
Q10570	2.01325	0.534443	0.0499204	sp|Q10570|CPSF1_HUMAN`Q10570`Q:12-184,H:1271-1443`84.39%ID`E:9e-87`RecName: Full=Cleavage and polyadenylation specificity factor subunit 1; AltName: Full=Cleavage and polyadenylation specificity factor 160 kDa subunit; Short=CPSF 160 kDa subunit;`Eukaryota; Metazoa; Chordata; Craniata; Vertebrata; Euteleostomi; Mammalia; Eutheria; Euarchontoglires; Primates; Haplorrhini; Catarrhini; Hominidae; Ho…	GO:0005847^cellular_component^mRNA cleavage and polyadenylation specificity factor complex`GO:0003730^molecular_function^mRNA 3'-UTR binding`GO:0006379^biological_process^mRNA cleavage`GO:0006406^biological_process^mRNA export from nucleus`GO:0006378^biological_process^mRNA polyadenylation`GO:0000398^biological_process^mRNA splicing, via spliceosome`GO:0006369^biological_process^termination of RN…	PTQLTFPLFVSVSDRDKNLFVYMYLPEAKESFGGMRLLRRADFNAGAHINSLWRMPCRGALDAGSKKALTWDNKHITWFATLDGGIGLLLPMQEKTYRRLLMLQNALTTMLPHHAGLNPKAFRMMHSNRRSLQNAVKNILDGELLTKYLYLSTMERSELAKKIGTTQDIILDDLLEMDRVTAHF*	CCTACTCAGCTCACATTTCCTCTCTTTGTTTCAGTTTCGGATCGAGACAAGAACCTCTTTGTCTACATGTATTTACCTGAAGCTAAAGAGAGTTTCGGGGGCATGAGGCTGCTGAGGCGCGCTGATTTTAACGCCGGAGCGCACATCAACTCTCTGTGGAGGATGCCGTGCAGAGGAGCGCTGGACGCCGGCAGCAAGAAGGCACTCACCTGGGACAACAAGCACATCACCTGGTTTGCGACGCTGGACGGAGGTATCGGGCTGCTCCTCCCCATGCAGGAGAAGACGTACCGTCGTCTGCTGATGCTGCAGAACGCTCTGACCACTATGCTGCCTCATCACGCTGGCCTCAACCCCAAAGCCTTCAGAATGATGCACAGCAACAGGCGAAGCCTGCAG…
P98082	2.00555	3.49399	0.0200843	sp|P98082|DAB2_HUMAN`P98082`Q:51-256,H:35-239`73.91%ID`E:2e-82`RecName: Full=Disabled homolog 2; AltName: Full=DOC-2; AltName: Full=Differentially-expressed protein 2;`Eukaryota; Metazoa; Chordata; Craniata; Vertebrata; Euteleostomi; Mammalia; Eutheria; Euarchontoglires; Primates; Haplorrhini; Catarrhini; Hominidae; Homo.	GO:0016324^cellular_component^apical plasma membrane`GO:0030665^cellular_component^clathrin-coated vesicle membrane`GO:0005905^cellular_component^coated pit`GO:0005634^cellular_component^nucleus`GO:0038024^molecular_function^cargo receptor activity`GO:0035615^molecular_function^clathrin adaptor activity`GO:0046332^molecular_function^SMAD binding`GO:0006915^biological_process^apoptotic process`GO:…	MSAEVETSAPAPVEPSSQTVDSTSSTPPTSPSTATSRVPFKREKKKIPEKTDEYLLSRFQGDGVRYKAKLIGIDDVPEARGDKMCQDSMMKLKGMAVAARSQGKHKQRIWVNISMSGIKIVDEKSGVIEHEHAVNKISFIARDVTDNRAFGYVCGAEGQHQFFAIKTAQQAEPLVIDLKDLFQVIFNVRKKEAESSQKGENGSSVVENGGDALLGVDGGVKTAQPVEQLDLFGDMSTPPDVQVPSSGSNDLFGAELFTTPAPSESSSVPPDLFNNTPVNSTPSTIAALGNLQLGLPATTTVHPAGMWGAPAAAPAMFPMPGVGAPGPRPGFMPQPAFGPPMAAPAWPQQIQPQFNPPPLSPPHLSWGQPAASNPFQQGAFPDQGGPSRPPPRAPVKQAP…	GAAATCAGCAACAAGTCTGCCGTCCTGTCAGTGACGGAGGGGTTAACGGGAGCGCGCAGACGTCTCTCTCCTCTCATTTTCTCTGCTGCGGCTGATTCCAAAGCTGCTTCTGATTTGACTGATTTTTGCAGCTGAAGGCACCGCGGGGCAGAAGAACACACCGCTGAGGGCTGCGGGAATCGAACGTCCTACTGCGCGCTTTCACACAGTTGGAGAAGCATGCGTGGGTGTTGAAGGCCGCATTCTCACGTCATCGCCTTCTCGCCTCCAGCCCGGAGCGTCTGTCTGCTTTACCCCAGGTTGTCACTCGTTCGGTGAGGCTGAGCCCACGCCATGTCTGCAGAGGTGGAAACCAGCGCGCCCGCACCTGTCGAGCCCAGCTCCCAGACTGTGGACTCG…
Q8C3J5	2.00254	2.91755	0.0236514	sp|Q8C3J5|DOCK2_MOUSE`Q8C3J5`Q:1-1166,H:655-1818`70.22%ID`E:0`RecName: Full=Dedicator of cytokinesis protein 2; AltName: Full=Protein Hch;`Eukaryota; Metazoa; Chordata; Craniata; Vertebrata; Euteleostomi; Mammalia; Eutheria; Euarchontoglires; Glires; Rodentia; Sciurognathi; Muroidea; Muridae; Murinae; Mus; Mus.	GO:0005737^cellular_component^cytoplasm`GO:0005856^cellular_component^cytoskeleton`GO:0012505^cellular_component^endomembrane system`GO:0005634^cellular_component^nucleus`GO:0005886^cellular_component^plasma membrane`GO:0030675^molecular_function^Rac GTPase activator activity`GO:0030676^molecular_function^Rac guanyl-nucleotide exchange factor activity`GO:0042608^molecular_function^T cell receptor…	ALFNIMMEHSQTDDYDILVFDALIYIIGLIADRKFQHFNTVLEAYIKQHFSATLAYKKLMSVLKRYLDVSSRGEQCEPILRTLKALEYIFKFIVRSRMLYSQLYEGKEQTEFEESLKRLFESINNLMRTDYTTTLLLRVAALKYLPTVLHDVEKVFDGKLLSQLLHDFYSCIPPEKLQKQKVASMTEIVSSQLFQRKECRDVLLPMMLRELGKALASMADGPHDERRNSLELLNNILEVLSRNTVGETFQHIQDIVVSLLRIINRTVITMGREHALISRVVACMTAILSQMDDRHYAKYIETFTGSTDLVDFLMESFLLFKDLIGKHVYPSDWMAMIMVQNRVFLRAINTYAVTMNQKFLNNDDFEVQLWNNYFHLAVAFITQESLQLQHFSPTKRNKI…	GCGTCACTTCACAAAAATAGGCTTTATTGATGAGCAAAATCAATTCCACTAAGGAAACAGCAATACTGAAACTAACAGAAAGATTGAGTGACTGAATCCATTATTGTGGTCGTATCAACAGTTGTAGCAAAATAAGGCTAAAGAAACAAGTAAAAAAAAACATGGATGCAAACCAGACATGAAATTTAAAAGTGATTGCTGCTGTCTTTGGCTGCTTCACTGGCCTTTGCATCTTCTGACTTGGAGCTCTTGGATTTGAAGAGCAGGTTAATGACACCCTTTGAGCGTCTGTCTGCTGTCCGATCAGAGGTCACAAAGGCCGACATGCTTTTACTGTCCCTCTGCGCTCTGGATGAATCTGCTTCCTCTGCCCCACCAGCCACAGACAAGGCCATCCCT…
O75970	2.00067	1.51587	0.0225549	sp|O75970|MPDZ_HUMAN`O75970`Q:61-786,H:1325-2070`66.53%ID`E:0`RecName: Full=Multiple PDZ domain protein; AltName: Full=Multi-PDZ domain protein 1;`Eukaryota; Metazoa; Chordata; Craniata; Vertebrata; Euteleostomi; Mammalia; Eutheria; Euarchontoglires; Primates; Haplorrhini; Catarrhini; Hominidae; Homo.	GO:0016324^cellular_component^apical plasma membrane`GO:0016327^cellular_component^apicolateral plasma membrane`GO:0005737^cellular_component^cytoplasm`GO:0031410^cellular_component^cytoplasmic vesicle`GO:0014069^cellular_component^postsynaptic density`GO:0045211^cellular_component^postsynaptic membrane`GO:0043220^cellular_component^Schmidt-Lanterman incisure`GO:0005923^cellular_component^tight j…	EERAAAATARDVKDKPLKRETAKISPTGTLLALPVVPHAGESDTDALTEAPAVTGEEGEEEKVDEFGYTWKSVIQRYGSLPGVLHMIELEKGKTGLGLSLAGNRDRSRMSVFVVGIDPNGAAGRDGRILVGDELLEINGQILYGQSHQNASSIIKSALSKVKIIFIRNTEALNQMAVGPVRGETQESHAESETNTADDDSSKQLHHIIKLKGDGGLGITFVDGDTESGVEVQSISEVTGHSGHEGCMKPGDKLLAVNGVSVLGYTIEKVNSLLRKAKGPVRLTFSTAETPSFSFSQSEGQDSKHSEEVLASLPSMPSSSPTPETEAVASFSRSSTPSTLACDPTTCPIIPGCETTIEISKGRTGLGLSIVGGCDTLLGAIIIHEVYEEGAASKDGRLWA…	TTGGGAATTCAAAGGTCACTTTTATTAAATTCAGTGTTAACAGACACAATACTGTCCAAGTGGCAGCACTAGAGAGGTGATAATACAGAAGACGTCTTACTTTGCCCCTAAACCACACAACTCCTGCCTGACTAGCTGACAGTCCAGCTGAGCTCGGGTCACAGTTTTTGAACATCAATTCTTTAAAAAAATACTGACTTTATGTTCTTAAATGAGCTTTAGCAGCGCTATATTTCTGAAACTCCACAAACACACTTTCTCCTTCAGATCAGTGATAACAAGCTGTGCAATAACAACACTTCAGTCCAGTGTCATGGAATGCTTCACAGTGACCTTCATCAGTGACCTTCTACCTCTAGTAGGCTTTCCTCCATCAGTGACGGCGTCTATGACAGCACG…
P28799	2.00046	4.14793	0.0104127	sp|P28799|GRN_HUMAN`P28799`Q:21-273,H:205-410`34.9%ID`E:5e-30`RecName: Full=Granulins; AltName: Full=Proepithelin; Short=PEPI; Contains: RecName: Full=Acrogranin; Contains: RecName: Full=Paragranulin; Contains: RecName: Full=Granulin-1; AltName: Full=Granulin G; Contains: RecName: Full=Granulin-2; AltName: Full=Granulin F; Contains: RecName: Full=Granulin-3; AltName: Full=Granulin B; Contains: Re…	GO:0005615^cellular_component^extracellular space`GO:0043231^cellular_component^intracellular membrane-bounded organelle`GO:0005739^cellular_component^mitochondrion`GO:0008083^molecular_function^growth factor activity`GO:0001835^biological_process^blastocyst hatching`GO:0008219^biological_process^cell death`GO:0007566^biological_process^embryo implantation`GO:0050679^biological_process^positive r…	MLRTSLWLCVGVLVCGSALCSIKCPDGRQCPDLSTCCQTGHGFSCCPLPDAVCCSDKAHCCPSGYRCNLATMMCEKADQPWMSIPMLKKEAAEEPAALDPSSNLVEELRNDDGPVQKSTAIHCDSYYMCPDRTTCCRHPKGAWFCCPYYPGRCCLDGYHCCPYGYDCDLTYTHCIRDGSKYPFYYKQTQTSVPAALISQPEDNSIGQEKPLTALTEASDAPPDHGVIRCDDKFFCDQGSSCCKGPKGQWNCCPYPLGKCCADGRHCCQYGYTCDPTSATCRSLWTI*	ATGTGAGGCATGTGACAGGAAGACACCGACTTACACTTCTTGAAGATGTTGCGAACCTCCTTGTGGCTCTGTGTGGGAGTGTTAGTGTGTGGGTCTGCATTATGCTCCATCAAATGTCCCGATGGAAGGCAGTGCCCTGATCTATCCACCTGCTGCCAGACTGGACATGGATTCAGCTGCTGCCCCCTCCCAGATGCCGTGTGCTGCTCTGACAAGGCCCACTGCTGCCCCTCGGGGTATCGCTGCAACCTGGCCACGATGATGTGTGAGAAAGCAGACCAGCCGTGGATGAGCATCCCCATGTTGAAGAAGGAGGCTGCAGAGGAACCGGCCGCTCTTGATCCGTCCTCAAACCTTGTTGAGGAGCTCAGAAACGACGACGGCCCGGTACAGAAGAGT…
Q6DFR2	1.98543	4.17891	0.00565384	sp|Q6DFR2|CBLB_XENTR`Q6DFR2`Q:1-523,H:33-552`84.51%ID`E:0`RecName: Full=E3 ubiquitin-protein ligase CBL-B; EC=6.3.2.-; AltName: Full=SH3-binding protein CBL-B; AltName: Full=Signal transduction protein CBL-B;`Eukaryota; Metazoa; Chordata; Craniata; Vertebrata; Euteleostomi; Amphibia; Batrachia; Anura; Pipoidea; Pipidae; Xenopodinae; Xenopus; Silurana.	GO:0005737^cellular_component^cytoplasm`GO:0005634^cellular_component^nucleus`GO:0005509^molecular_function^calcium ion binding`GO:0004871^molecular_function^signal transducer activity`GO:0004842^molecular_function^ubiquitin-protein ligase activity`GO:0008270^molecular_function^zinc ion binding`GO:0007166^biological_process^cell surface receptor signaling pathway`GO:0023051^biological_process^reg…	ILGIFDAIQDAVGPPKQAAADRKTVEKTWKLMDKVVRLCQNPRLQLKNSPPYILDILPDAYQHLRLILGKYEENQRLTQLSENEYFKIYIDGLMSKSKRAIRLFKEGKERMYEEQSQDRRNLTKLSLIFSHMLAEIKAIFPGGQFQGDTFRITKADAADFWRTYFGEKTVVPWKVFRQCLHEVHPISSGLEAMALKSTIDLTCNDYISVFEFDIFTRLFQPWGSILRNWNFLAVTHPGYMAFLTYDEVKARLQKFISKPGSYIFRLSCTRLGQWAIGYVTGDGNILQTIPHNKPLFQALIDGFREGFYLFPDGRSYNPDLTDLCDPMPHDHIKVTQEQYELYCEMGSTFQLCKICAENDKDIKIEPCGHLMCTLCLTAWQESDGQGCPFCRCEIKGTAP…	TTTTTTTTTTTTTTTTTTTAACACAGTCCTGAGTCTGACAGGAGTGTTTAAAACCAGAGGCCAGCACTGGCAAAGCTTGTTGTAAACAAAAAGCCTCTTTTCTTTCCAAGTCTGAATCCCTCACATCCACTGTTGACTCCTCCTCAGTCGTTTGGTTTCAGCCACTTTGTGCATGGACATCTCTGTTTGGCAACGCAAGGCAAATCTCTCTTAAAACGCTTCTGTTCCCGTGAAGCTCTGATTTCTCCAACACTCAGAGAAAAGAAGCCCTTTTATCAGGCACAGCTTCATGGAGGAGCCCCTCCGCCCCATTTAACCGTTAGGACTAGAGGTTCAGTCTGGGGCTCACTAAGGCAAACTCTCTCAGGATGTTGCGGGCCACGTCGACTTTGTAATCGG…
Q96MK3	1.96442	0.285745	0.0427048	sp|Q96MK3|FA20A_HUMAN`Q96MK3`Q:1-125,H:399-523`75.2%ID`E:6e-47`RecName: Full=Protein FAM20A; Flags: Precursor;`Eukaryota; Metazoa; Chordata; Craniata; Vertebrata; Euteleostomi; Mammalia; Eutheria; Euarchontoglires; Primates; Haplorrhini; Catarrhini; Hominidae; Homo.	GO:0005576^cellular_component^extracellular region	MSIFDFLIGNMDRHHYEIFTKFGDEGFLLHLDNARGFGRHSKDEMSILAPLSQCCMIKRSTLLRLQLLAQPEFRLSEVMTESLKTDLLQPVLTEPHLLALDRRLQKVLRTVQRCVRRFGKEEVITSDFIKPTAETQTVTQKSEPR*	AATTTCGCCAGTTGCAATCAAAAAATCGTGCTTCATACCGCATAATATTATTGATTTTATGACAGGATATTTTTTCCTTCAGGTGGGAAGTGAATCCTTTCTTCTGCGACGCCATAAAGCAGCTGTATCCTTATAACTCAGGGAACCGGCTGCTCAACATCATCGACATGTCCATCTTCGACTTCCTGATCGGAAACATGGACAGACACCACTACGAAATTTTTACCAAATTTGGAGACGAAGGTTTTCTCCTCCACTTGGACAATGCCAGAGGGTTCGGGAGGCATTCGAAGGATGAGATGTCCATCCTGGCTCCTTTATCCCAGTGCTGCATGATTAAACGCTCCACGCTGCTCAGACTGCAGCTCCTGGCCCAACCAGAGTTCAGACTGAGCGAGG…
Q5RCW2	1.95043	2.1376	0.0337532	sp|Q5RCW2|PNPT1_PONAB`Q5RCW2`Q:31-766,H:45-779`78.8%ID`E:0`RecName: Full=Polyribonucleotide nucleotidyltransferase 1, mitochondrial; EC=2.7.7.8; AltName: Full=Polynucleotide phosphorylase 1; Short=PNPase 1; Flags: Precursor;`Eukaryota; Metazoa; Chordata; Craniata; Vertebrata; Euteleostomi; Mammalia; Eutheria; Euarchontoglires; Primates; Haplorrhini; Catarrhini; Hominidae; Pongo.	GO:0016020^cellular_component^membrane`GO:0045025^cellular_component^mitochondrial degradosome`GO:0005758^cellular_component^mitochondrial intermembrane space`GO:0000175^molecular_function^3'-5'-exoribonuclease activity`GO:0035198^molecular_function^miRNA binding`GO:0034046^molecular_function^poly(G) RNA binding`GO:0008266^molecular_function^poly(U) RNA binding`GO:0004654^molecular_function^polyr…	MKYLFGLSRFFSRRHVRFCHQSVYNRHSDPRRIGVELGEKKLEISSGRFARFADGSAVAQLGETSVMVTAVSKTKPTSSQFMPLVVDYRQKAAAAGRIPTNYLRRELGTTDNEILTSRLIDRSIRPLFPPGYFYDTQVLCNLLAVDGVNDPDVLAINAASAALALSDIPWHGPIGAVRVGMVDGELLINPTRAEMASSTLNLIVAGAPSSQVVMIEASAENVLQQDFCHAVKVGVKHTQQIILAIQQLAREQKVTKRTPVKMFFPPTEMVEHVRKFASEKIYTVFTDYSHDKISRDEAINKVRLEAEEDLKAAFPQAEPFDFIESFNIVSKEIFRNLVLNEYRRCDGRELTALRNISCEVDLFRPLHGSALFQRGQTQVLCSVTFDSLESSIKTDIITT…	AGAGTGAATTTATTTCCAAAAATGACCTTTATGTTTAGAAATGCCATGTACTTGTCTATTTACATAGACTATAAATAAAAAAGAAAAGTACTGTGAACTTCTCCCACTTTGTTTTTTTCTATATCACCATATTAGAGAACAAACTGCCACAATAGATATAAAATTCATAAACCAGAATAGTTGACTTTTGCAAACTTGTAAGAATACAACCACATAAGGCACAGATATGTGGGAGTATAAGAAGCATTGTTGTTGATACATGACATAATAAAGTCTACACATTTTTATATATAAAAAAAGCATCGTCTGTTCTCATCGGCTGGATGCCTCATTTGTCCAATAGTGCCATGGTTCAGATGTCTTTCTTGGAATCACTTCTTCAGAAAGTTCCATTCAAAT…
Q6DBU1	1.92532	1.04231	0.0353734	sp|Q6DBU1|P15LA_DANRE`Q6DBU1`Q:5-104,H:9-107`67.33%ID`E:3e-32`RecName: Full=Proline-rich protein 15-like protein A; AltName: Full=Protein ATAD4-A;`Eukaryota; Metazoa; Chordata; Craniata; Vertebrata; Euteleostomi; Actinopterygii; Neopterygii; Teleostei; Ostariophysi; Cypriniformes; Cyprinidae; Danio.	.	MAESSWWKLTFSRKKKSESKVLYEIPAEYGSNNGNKEHPGAAPDSMDSQLNARLEKIVDKSASKGRHVKVSHSGRYKEKKRVRATLVENPNLFPEKDPADENHKKKTDK*	GCACCTTAATTTTTTCTTTGCAAAACATCAAAAGAACAAAGTTTTCTTTGAATAAAGTTCATAATAAAAGTTTTAAAAAAAACTAAATGACAGTTTTGTGGTTCACAAGCTGAGCCTGGACCTTTCCTTCATGATGGGATTCATTTGTGAAAATACAGAACAAGCAGAGGAAAACTGTATAAACTTTTAAAATCAGCAGAACTGGTACCAGTTCTGATGTGTGGACGTCTAAGATTTGTTTGTTAAGGTGTGAGTGCAGCGGTTTCCCAGTAACACTCTGGGGTGTGTTAAAGCTCTCAGAAGTGACTCCCAATTCCACATCCATGATCAAGCTACTTGTCCGTCTTCTTTTTGTGATTCTCATCCGCGGGGTCCTTCTCTGGAAACAGATTTGGGTTT…
Q9YGC1	1.92403	2.08277	0.0359801	sp|Q9YGC1|BLNK_CHICK`Q9YGC1`Q:258-369,H:440-550`53.57%ID`E:8e-29`RecName: Full=B-cell linker protein; AltName: Full=B-cell adapter SH2 domain-containing protein; AltName: Full=Cytoplasmic adapter protein; AltName: Full=Src homology 2 domain-containing leukocyte protein of 65 kDa; Short=SLP-65;`Eukaryota; Metazoa; Chordata; Craniata; Vertebrata; Euteleostomi; Archosauria; Dinosauria; Saurischia; T…	GO:0005829^cellular_component^cytosol`GO:0005886^cellular_component^plasma membrane`GO:0042113^biological_process^B cell activation`GO:0035556^biological_process^intracellular signal transduction	MKMTFFGKLKNLNAGPPAPPRRPGNSGFDWPQDEFTDDEEGDMYEAPPCERPAVKVPQTQVQDNIYLERTTNPGIPKREAAPLPPQAPKNMKRQQRQDLINDMKKPPEVDRNDKPGRKKMMPPPPPPVSESNEEDVYLDPNQEPEENDDLYLEPEAACSPGPRAPMRKPPSPSTAAVPMPMAKPPIPGGKSSSMFPPVIDRKTGQESSSVLTQNVSQPAKYKHPTCRTEFATLTPGVSYLLKPQGGMRVNKPLRDEDKEWFAGDCTRKTAEDFLERVNKDGAFLIRHSSDQRTSQPFTLAVLYQQKVYNIPIRFLEDVQGYALGKEGKTNEETFSSLDEMISHHKKNKLLLIDSKSQAKHSVHLTYPGRP*	CGGGTCGTTTCTGATGTGCGTTTCATTTAGAGGAAGACAGTGTGACAGCAGGTGTGGTTGTCGGTCTGTCTGCTGTTTCAGGACCCGAGCAAAGACTTCCTCATGGCTTAATCGCTGGTCAGGCTGGACCTCAAATCATGAAAATGACCTTTTTTGGAAAACTGAAGAACCTGAACGCTGGACCTCCAGCTCCTCCCAGACGGCCAGGCAACTCTGGATTTGATTGGCCACAAGATGAGTTTACGGATGATGAGGAAGGGGACATGTATGAAGCCCCTCCCTGTGAGCGTCCGGCAGTCAAAGTGCCACAGACCCAAGTACAGGACAACATTTATTTGGAGAGGACGACCAACCCAGGTATTCCCAAGAGGGAGGCTGCTCCTCTACCTCCCCAAGCAC…
A2AAY5	1.92029	2.07703	0.0284751	sp|A2AAY5|SPD2B_MOUSE`A2AAY5`Q:2-642,H:247-908`45.91%ID`E:8e-125`RecName: Full=SH3 and PX domain-containing protein 2B; AltName: Full=Factor for adipocyte differentiation 49; AltName: Full=Tyrosine kinase substrate with four SH3 domains;`Eukaryota; Metazoa; Chordata; Craniata; Vertebrata; Euteleostomi; Mammalia; Eutheria; Euarchontoglires; Glires; Rodentia; Sciurognathi; Muroidea; Muridae; Murina…	GO:0030054^cellular_component^cell junction`GO:0042995^cellular_component^cell projection`GO:0005737^cellular_component^cytoplasm`GO:0002102^cellular_component^podosome`GO:0080025^molecular_function^phosphatidylinositol-3,5-bisphosphate binding`GO:0032266^molecular_function^phosphatidylinositol-3-phosphate binding`GO:0070273^molecular_function^phosphatidylinositol-4-phosphate binding`GO:0010314^m…	MVVEVIQKNLEGWWKIRYQGREGWAPASYLKKSDIQSQRQSAGAAAHASANDLEGFSKQSPQNNAKDNKENRLSLFSENIKSKVGSRHRPPPRRDLTIPRGTNLPKPPVPPLVEEEFYTIADFQTTIPDGISFQAGVKVEVIEKNGSGWWYIQIDEKEGWAPATFIDKYKKTSNALRPNFLAPLPNEMEKLRLEDGGSSNATGTDDTWSKPLPDEPTAVQDTHTRPKLRDWKSGATKGNPAFSGPLPPAPAAPPVEEKPALPPRRESINKSFEFEGVEKPRSDHSKPLPPKPPAPGVIVPLVTPKTAPFKPDKPPEAKKEDKSKALHLKNEMGLECGHKVSAKEVKKFNLKPVPKQPPKPKAEVPEEKPEVAGPAVLMKPKPVIRPKPAPAAKPEALAE…	GTAATTTAAATATTACACTTTGCATTCTGCATTACTTTTTCTGAAATGTTACAGTAACTAACCTTTATTAACTCAATAGTGTCGGTTTGTAAAAGGATGTTTTAAAAATTTGCTTTTAAATGCATGGTTATCAATTAAGAGCCATTTATGATTTTCAAGGATCGCTTGTTGTGAGTCTTGAGCAAATTGTATTTTCTAACTAAACTGCAAATGTTGCTGCCACCTGTTGACCTATGGAGTCTGGAAAGAGCCAAAATGAAATAAATATATAAGACGCATGACATGTGGAAAATCTAATTTATTGACTCAAAAAGGAGGCTGGAAATGACAATTACATATAGAAAAAAAAATTAAAATCAATACTGAAATGACATTGCATTCACGTTTATTGTCTTTTGG…
A1DWM3	1.90724	3.8428	0.00537105	sp|A1DWM3|MFSD6_PIG`A1DWM3`Q:1-750,H:1-790`55.8%ID`E:0`RecName: Full=Major facilitator superfamily domain-containing protein 6; AltName: Full=Macrophage MHC class I receptor 2 homolog;`Eukaryota; Metazoa; Chordata; Craniata; Vertebrata; Euteleostomi; Mammalia; Eutheria; Laurasiatheria; Cetartiodactyla; Suina; Suidae; Sus.	GO:0016021^cellular_component^integral to membrane`GO:0055085^biological_process^transmembrane transport	MAADDKVAILPEDEEDAKKKYVLSEPFNYLSMEQQGEQQGPDPEPQPEPVQDLQPVPMDCCERLCLRINSHLLISKVFYFFFYAAYGSLHPLLAVYYKQLGMSASRSGLLVGIRYFIEFCSAPFWGIVADRFKKGKAVLLFSVMCWLMFNCGIGFVNPADMQCVEVVGSSTTTAAPTAPNATVPINSTNPTRSRRSVLDLTLGLNVTSTPYNVTETATVHSTTTSTRPPTTSQKEYQIVFNQDQVETIFLIILLVIIVGEFFSAPAVTIVDTVTLQYLGKARDRYGLQRMWGSLGWGLAMLLVGIWIDHTHVAIQTHIEGCVPPDYRLHNYRIAFIVFGVLMGVAFIVATQFYFERGGDYTQEVPEVVEESSNPQTDPSPSSQTPSGSEAPQEFHYSDL…	TTGTTTTTCTGTGGAAAATTGATCTTTTCTGAACCGTATTTAACTAGACTCACTAGTTTCTGAAAATACAAATGAAACTTAGAAAGAAAAAAAAAACTTTTTTGACATTGAATTCTATTTTTGGAAGTTGACTTTGATGCTTTCACCGTAGCGATGATCCTCTGAAAGCGCAGCGTCATGTTTCTGGATCAAAGTGCCGAGTCATTGATTCAACACTCGGCTGTTTTCAGGGAATAAATAGCTTATAAAGAGGAACGTTTGACCTTAACGGATCAGACGGTGCAAAAAAACCACAGAGGGGGAGAACTTCCATTTCAAACCCGAACATACCCGCAAAAAATTCAAATAAATAAATTAAATCCCAATAATTTAACTCCACAGATTTTCGTATTCGTCGGT…
Q8IZE3	1.88215	1.28909	0.0262479	sp|Q8IZE3|PACE1_HUMAN`Q8IZE3`Q:1-597,H:143-742`44.83%ID`E:2e-122`RecName: Full=Protein-associating with the carboxyl-terminal domain of ezrin; AltName: Full=Ezrin-binding protein PACE-1; AltName: Full=SCY1-like protein 3;`Eukaryota; Metazoa; Chordata; Craniata; Vertebrata; Euteleostomi; Mammalia; Eutheria; Euarchontoglires; Primates; Haplorrhini; Catarrhini; Hominidae; Homo.	GO:0005794^cellular_component^Golgi apparatus`GO:0030027^cellular_component^lamellipodium`GO:0005524^molecular_function^ATP binding`GO:0016772^molecular_function^transferase activity, transferring phosphorus-containing groups`GO:0016477^biological_process^cell migration`GO:0006468^biological_process^protein phosphorylation	METVCKFSEATPEFLQSVENAREASCVPPEEQAEGFKMLPDRHAHARDCYSFGVMMEALVPLLNGYVSQELSESLTRTLQAGPLNSDPTARPPLSSLLTHEFFRNDFLEVMNFLKSLTVKSEEEKNEFFKFLLDRVQSLPEELIATRLAPKLLNSLVFAEPTAVKSFLPHLLRPKMDPCRGGSPEDCLLSAPLYRKHVLPQLLKLYKVNEEHVRFVLLAHIHIYAQFFSQEELRNQILPQVLLGMRDTNDSLVAMTLQSLAVLVPLLGAQVVVGGERTKVFKRTTPGFTKSTEVTPETSPVHIVGDSHPQMAQPSKALHLFPRPSEAENSGNVELQDAPPPDGGRHAALNGFHRQNFRSCRPEQQGRLGSVEDWPDWSDQEEGQSKDGHSVQIHIQEPQ…	TACGTTTTAAATGAGTTTTTGTACAATAAAATCTTTATTTAATCAGCGTTCAAACCAGCTCAAATAAATTATGACATTTCTAGTTACATTCATTCAAAGTGCAAACTCCACTTTTCCAGAAACAGATCCTGTCAAGTTTGTACTGAGCTTCAAACCAAGTATCTGAGTTGGCACATTAAGAAAATAAAAAGATCTTCAATCATCTTAAGGTGATAAATGTCGATTGGCAAATCTGAGAGCCGTCTGTCAAAAGTCTAGCACCGTCTGACAAACGCCGACGCTTCGATATCAAAGGAAAGACCCACAATAAATACCAAGATGAACCTCTAGAAAAGAGCGCCCCCCCCTGACATGTTTCCTTACTGCATCTGATTAACGGAGGGGCTTCCTGCTCTTTGG…
P00504	1.87082	5.25375	0.00695084	sp|P00504|AATC_CHICK`P00504`Q:2-410,H:4-412`83.62%ID`E:0`RecName: Full=Aspartate aminotransferase, cytoplasmic; EC=2.6.1.1; AltName: Full=Glutamate oxaloacetate transaminase 1; AltName: Full=Transaminase A;`Eukaryota; Metazoa; Chordata; Craniata; Vertebrata; Euteleostomi; Archosauria; Dinosauria; Saurischia; Theropoda; Coelurosauria; Aves; Neognathae; Galliformes; Phasianidae; Phasianinae; Gallus.	GO:0005829^cellular_component^cytosol`GO:0004069^molecular_function^L-aspartate:2-oxoglutarate aminotransferase activity`GO:0080130^molecular_function^L-phenylalanine:2-oxoglutarate aminotransferase activity`GO:0030170^molecular_function^pyridoxal phosphate binding`GO:0006103^biological_process^2-oxoglutarate metabolic process`GO:0006531^biological_process^aspartate metabolic process`GO:0006094^b…	MSVFGEVPQAPPVAVFKLTADFREDSHPQKVNLGVGAYRTDDCQPWVLPVVKKVERLIVEDGSLNHEYLPILGLPEFRAAASKVALGDDSAAIQEGRVGAVQCLGGTGALRIGADFLRRWYNGSNNTATPVYVSAPTWENHNGVFGDAGFKDIRPYHYWDAAKRGLDLTGLLDDLEKAPEHSIFVLHACAHNPTGTDPTQEEWKTIAEIMKRRKLFAFFDSAYQGFASGDLDKDAWAIRFFVSEGFELFIAQSFSKNFGLYNERVGNLTVVAKDGDNLTRTLSQMEKIVRTTWSNPPSQGARIVSRTLTSPELFAEWKGNVKTMADRVLLMRSQLRSKLEALGTPGTWDHITQQIGMFSFTGLNPKQVEYLITEKHVYLMASGRINMCGLTTKNIDYIA…	GACCCTTCATCATCTAGTCCCGTGATTGGCTGCGAGAGTCTGACGTCACCCTAACGCGCTCTCCCATTGGTGGTTGGACGGGCGCGTGTTACGTTACCGTCCCTCCGCGGCGCTGTCAGTGAAGGTGAACTCGGCTCCTCTCCGCCTTTCTCTGCCCGTCTGTGGAGGCGCGCGTGCCCGGTCTTCTCCCGCTTCTCCGCACCGGTTTCCTCCGCCTTCACCTGAGCCATGTCCGTTTTCGGAGAGGTCCCGCAGGCGCCGCCCGTCGCCGTCTTCAAGCTGACCGCTGACTTCAGGGAGGACAGCCACCCGCAGAAGGTGAACCTGGGAGTTGGAGCTTACCGTACTGACGACTGCCAGCCGTGGGTTCTGCCCGTGGTCAAGAAGGTGGAGCGTCTG…
Q9QY53	1.86441	1.86794	0.0170564	sp|Q9QY53|NPHP1_MOUSE`Q9QY53`Q:6-208,H:7-210`37.32%ID`E:2e-23`RecName: Full=Nephrocystin-1;`Eukaryota; Metazoa; Chordata; Craniata; Vertebrata; Euteleostomi; Mammalia; Eutheria; Euarchontoglires; Glires; Rodentia; Sciurognathi; Muroidea; Muridae; Murinae; Mus; Mus.	GO:0005912^cellular_component^adherens junction`GO:0005911^cellular_component^cell-cell junction`GO:0035085^cellular_component^cilium axoneme`GO:0005737^cellular_component^cytoplasm`GO:0005856^cellular_component^cytoskeleton`GO:0031514^cellular_component^motile cilium`GO:0032391^cellular_component^photoreceptor connecting cilium`GO:0005923^cellular_component^tight junction`GO:0030030^biological_p…	MPLKRRGPLQLVQREVDELKKKVDQLVKDVKSQVGSTEEAFRRCQDLQLSAEKTLKTLQNLTKADELAPVGNYDQRKQEEERRLQEILERLNDLFLDLSPPGPSRQAGDVSKDKSRRDANEEEGSSSGDNNEEDSDDDEDEEEKKALKPPSQSDLRIYTVLSDFKGEEEGDLSVQTGEVVRIIRKTVDGWWLAQDSKGNRGVVPKTFLKFGSGVDKDDEEDDDD	ATCATCATCATCCTCCTCATCATCTTTATCAACACCGCTGCCAAACTTCAGAAACGTCTTCGGAACCACCCCTCTGTTTCCTTTGGAGTCCTGAGCGAGCCACCAACCATCCACCGTCTTCCGGATGATCCTCACCACCTCTCCTGTCTGAACTGACAGATCTCCTTCCTCTTCTCCTTTGAAATCACTCAGGACCGTGTAGATCCGGAGGTCTGATTGTGACGGTGGCTTTAAGGCTTTCTTCTCCTCCTCATCCTCATCATCATCAGAGTCCTCCTCATTGTTATCACCACTGCTACTCCCTTCTTCTTCGTTAGCATCTCTCCGACTCTTATCCTTTGAAACGTCACCGGCTTGACGGCTGGGTCCAGGTGGAGAAAGATCCAGAAAGAGATCATT…
Q8K4R9	1.85351	2.08586	0.0191677	sp|Q8K4R9|DLGP5_MOUSE`Q8K4R9`Q:1-597,H:2-601`32.08%ID`E:5e-64`RecName: Full=Disks large-associated protein 5; Short=DAP-5; AltName: Full=Discs large homolog 7; AltName: Full=Disks large-associated protein DLG7; AltName: Full=Hepatoma up-regulated protein homolog; Short=HURP;`Eukaryota; Metazoa; Chordata; Craniata; Vertebrata; Euteleostomi; Mammalia; Eutheria; Euarchontoglires; Glires; Rodentia; S…	GO:0005634^cellular_component^nucleus`GO:0031616^cellular_component^spindle pole centrosome`GO:0004721^molecular_function^phosphoprotein phosphatase activity`GO:0007267^biological_process^cell-cell signaling`GO:0000087^biological_process^M phase of mitotic cell cycle	MESRFASLRQRDASVSMLRVKMSRRRSQTQKENRQRTINTRRQLEKLQELEMSSLDASMARSNMSTLQEREANVKPEKIKAQEERLKQLERWKERKALEREKEKREKQQKGVFKTGLYHPKDVFTGAAAPPASAKLKERKVNVAPTQSTRVTRSMKQQEVQQIQNPVAALSKVKPDPGSRPNRLRAAPVKAAPSATKSKVCNVSDRITTAGPAVQSLPGRSARRPPVPKAPAGKDKLTEKVADVRTTRDRTALAPSSGQKEAAKLLSDPIHPTPSEDPEPNEEKLEHPEKVPSPPKQTACAEEEDMQVEEAPPPPPSFAPKNFTFQAPLGLSSFKFEPLTPRSADAFLTPSPTLNLPPVPPFTLDPPAEPSKPSPPRPAPAASAPSPCSPLESKHDVPY…	TCCAACACCTTCTGTCTGCAAATGTAAAGTGGGAGAGTTTACGGCGAGTCTTGACAGTTTTTTAAACAGAACTTTATTCACCATGTTTTATAAAAAGTGACCATAACAGCATAAAAAGGTTTAGATGTTGGAAGGAGGAGTGAAGCACATGAGGTCAGTCGGACAGACCGACTGGCGAATTCTGTCCTTCAGGTCCGGAGTGAAGAGCAGCAGGGCAGCCTTTGCACTCTGCACCTGTGGTGATTGAGGAGAAAACACCGAAGACCCCGCTGACAGCGCTGGCTCTTGATGACAAAGAGATTCCTCTGCTCGACCTATGGGGCTCTCCATCTCCACGTCCGTCGCCATGGGTGACAGAATCTCTTCTGCAATTGGTTCTCTCGGAGACAAACTGCATCT…
Q8N859	1.85113	5.86131	0.000186446	sp|Q8N859|ZN713_HUMAN`Q8N859`Q:224-306,H:329-411`53.01%ID`E:1e-20`RecName: Full=Zinc finger protein 713;`Eukaryota; Metazoa; Chordata; Craniata; Vertebrata; Euteleostomi; Mammalia; Eutheria; Euarchontoglires; Primates; Haplorrhini; Catarrhini; Hominidae; Homo.	GO:0005634^cellular_component^nucleus`GO:0003677^molecular_function^DNA binding`GO:0046872^molecular_function^metal ion binding`GO:0008270^molecular_function^zinc ion binding`GO:0006355^biological_process^regulation of transcription, DNA-dependent`GO:0006351^biological_process^transcription, DNA-dependent	MSKLELLGAFLNERLTAAAEEILGAVKEAVEEYQSEILRSQEENERLKGLLHAAVQRLLLQPGPPPVPLQEDIQLRESEWRSREELVLLHVKEEPKPRHTQTDLEQELEQIPSEEPSLHAASLPRASPPPLASMELKREDSGENHVKLHASSSSSSPAKAPLDCRAAQTRTGLPSTKSRRPPKTAPPLKGLKPGVLTLPVKNGRPLKLPLPRPSQPGQSIQRWHSCSECGKSFSFACQLEVHTRWHTKEKPYGCGVCRKSFTTVSMLKRHHRIHTGEKPFRCHVCGKCFNQSAHLNTHFRLHTRDRAGRGRPPQ*	TTTCTTATTTAATTATTACAGGGAAAAAAGTTTTGACAGTAAAATTTTCATTTTTAAAAATACAATTTACCAAATATAATAACAAGCATGTTAATTTTCACTTTTTGGTTCAATTCTGAGAGTCAATACGATAGGTTCAAATATAACCAAAAAGTTTCATTTAGTTAATGATTCAGCCTTCCACACAAACTCTGATATCTTTCTAATTAATGAGGTGTTATTCCATCTCATTATAATATGACCAAACCAAATGGCAGGTCCTCCGCGCCAGCAGGTGGCGCCTCTCCGAGTCTCTCGGAGCGCCGTCTCATTTCCAGCTCCGGTTCGGTTCGGTGGATGTAAACACGGGGACGCGCCTCCACCGGACCGACACCGCTGGAGTCAACATGAGCAAGCTGG…
Q6P6G5	1.85056	2.3725	0.0253534	sp|Q6P6G5|YIPF1_RAT`Q6P6G5`Q:6-295,H:5-306`56.95%ID`E:4e-94`RecName: Full=Protein YIPF1; AltName: Full=YIP1 family member 1;`Eukaryota; Metazoa; Chordata; Craniata; Vertebrata; Euteleostomi; Mammalia; Eutheria; Euarchontoglires; Glires; Rodentia; Sciurognathi; Muroidea; Muridae; Murinae; Rattus.	GO:0016021^cellular_component^integral to membrane`GO:0030133^cellular_component^transport vesicle	MASNNDPFEFREFEDEGNLLDTNRDATTINIEDVKRQTKAAGFDPDADDEYPARSDDREELLSGQKKSAPFWTFEYYQKFFDIETHHVKERILGSLLPWPRKNFIQFYLRKNPDVYGPFWICTTLVFAVFISGNISNFMNGKYNPQFRKVTIAATMIFSYAWFVPLALWGFLLWRNNKILNLVSYSFMEIVCVYGYSLSVYIPAVVLCIVPLEWLKWVTMVVAFGLSGSVLVMTFWPALKEDHPRVAMATVSAIVLLDVLLAVVCKMYFFSTPQPSGAPVAPPTAGQLKANTSSS*	TGATTTGGCGAACAATCCGGTAAGTTTGTCTTTTGTGAATCTTCACTTTTAGCATTATTAAAATCTTTTGTACCCAAATCAGATGAAAGTGTCTTCAATGTTCTGTGAGATTTAGACGAACTTTGACTCGCAGCTCGTGCATCTCCGTATTTAGACTAAACGTGTCATTTAGAGCCCGGGGGACTCGGCTTCTTCTGCTGGACGTAAAACTGCTGAAAATCCTGAACTCCGACCTCGTTACTGAAGCAGATGGCCTCGAACAATGACCCGTTTGAGTTCCGAGAGTTTGAAGACGAAGGGAATCTGTTGGACACCAACAGGGATGCCACCACCATAAACATTGAGGATGTGAAGAGACAAACGAAAGCTGCTGGTTTTGATCCCGACGCGGACGATGAA…
Q0VCM6	1.82937	5.06936	0.022554	sp|Q0VCM6|LAT4_BOVIN`Q0VCM6`Q:1-593,H:1-568`70.85%ID`E:0`RecName: Full=Large neutral amino acids transporter small subunit 4; AltName: Full=L-type amino acid transporter 4; AltName: Full=Solute carrier family 43 member 2;`Eukaryota; Metazoa; Chordata; Craniata; Vertebrata; Euteleostomi; Mammalia; Eutheria; Laurasiatheria; Cetartiodactyla; Ruminantia; Pecora; Bovidae; Bovinae; Bos.	GO:0016021^cellular_component^integral to membrane`GO:0005886^cellular_component^plasma membrane`GO:0015179^molecular_function^L-amino acid transmembrane transporter activity	MAPTLATAFARRWWMAVTAIIENLLFSAVLLGWGSLLIMLKSEGFYSYLCHEEGNSSSLNLSQPLAKQTPEDYPEYFDTEEGVVGLGDGVEMKPLAPADSNLRMNGWLICKEQDEMLNLAFTVGSFLLSAITLPLGIVMDKYGPRKLRLLGSTCFGFSCLLIAYGAYKPTELSVLIFIALTFNGFGGMCMTFTSLTLPNMFGDLRSTFIALMIGSYASSAVTFPGVKVIYDFGIPFITILVVWAACAGLVFLNCFFNWPLEPFPGPEDMDYTVKIKFSWLGFDHKITGKKFYQQVTTVGRRLSVSSNVKQKELVAKDGRTLCLSTMDLEMDGKPQEETQSFMKSIMSPIFLLSALTMSITQLRLLFYMGAMNSVLESLTDGDLNTVSLYSSIFGVLQLL…	GTAGGTGTTGTCAAACAGGGAACGTTCGAGTAGAATAAGTTGCCATTTTTGCATTCAACTGGAAAAAAATTATATAGCACTATTTAATCCACCTAAATGCTTTTTTGTACTTTTTAAAAATTCACCAAACTTTTTCTTAACTTTTTCTCATTTTTAATGGTGATAGGGAAGTATTTAATTGATTTATGTCAACAAGTCCGCCCCCCTAAGTGTTGTCTAATACGTTCCTTATTCTGACCTCTGCTGGTTGAATCAAAAAGGAACAGAGAGCTGCAAATTTGTTCTCCTTAAATACTCAGTAACCATAGCAAACCGCTTTAGTCAGACACCGAGCGCAGCCGGGTGAGCGGTGAAAAAAGGCAAAACATCTTTTATTAAGTCTCACAAGTCCATCCACAT…
Q96RT7	1.8187	4.63846	0.0163592	sp|Q96RT7|GCP6_HUMAN`Q96RT7`Q:16-1849,H:2-1819`48.21%ID`E:0`RecName: Full=Gamma-tubulin complex component 6; Short=GCP-6;`Eukaryota; Metazoa; Chordata; Craniata; Vertebrata; Euteleostomi; Mammalia; Eutheria; Euarchontoglires; Primates; Haplorrhini; Catarrhini; Hominidae; Homo.	GO:0005813^cellular_component^centrosome`GO:0005829^cellular_component^cytosol`GO:0008274^cellular_component^gamma-tubulin ring complex`GO:0005874^cellular_component^microtubule`GO:0000922^cellular_component^spindle pole`GO:0008017^molecular_function^microtubule binding`GO:0000086^biological_process^G2/M transition of mitotic cell cycle`GO:0007020^biological_process^microtubule nucleation	MYLSSNTRSKPGPNSSSITELLGALCDCSLSGVSWKRRALGGVSRESFHRALKKRAYGALLSKVFQDGTKGSPPGQSATSSTPPRNKVLMMCFDLRVAGCREEAEALEEQLGRLPDGASSDLKEVDAVLELLVFLAGSAPPPTASFNRDYMRRERPVLRRPQPWSYQSEELQRLEARAWGLVCGEEWGTLESLCAAQRLMDAPPGTGLLALRTKLDAEEKFEKETRMSLFGALQHTRTSDMDIRLDIPPVPSNVDVTGLAIRVPHCLDQSEDEGFQSASNLTPDSQSEASPVPDFDLWEALRTFEPERRRCWESIGCPPGKRDSLYLTEGGREAFDQLYRLWEGQMRVVSTNTPSPVLPLPLDSQTQLVSDLLNVLIGVASSTFPLNQNVQFDVRPGVC…	TTAAATATTGGTGTAAATGTTTTTGTTTTTATCACTTCAGAGCAGAGAACTTTATTTACAGAGTACTTTGTATTCACACAAATTCATTTTACTAAAATACAGATGGTTGTAGGCACACATTTATGGATAATAAGCCTTAGGATTGCTCAAAGCTAAATTCAAATTCTCCTTCTTATGAAAGTGCAGGTGGAATTGGAAAAATACTCACGTGAAGGTGACAGAAAGTACAACGGGAAATTGGACACTTGACTAAAACATGCAGACTAGCACCCCACTCAGGAGTCTTTGTAGTAGTTATTGAAATTAATTCGCAGCAGAAAATCCTCCAAATGCGGCTGATATCCTCTGTTCACCAGCTTTGTAACCACTTTAAAAAGGAAGTGGGAGTAATACTTGAAG…
Q6ZW49	1.81244	3.28405	0.020214	sp|Q6ZW49|PAXI1_HUMAN`Q6ZW49`Q:255-731,H:591-1068`74.27%ID`E:0`RecName: Full=PAX-interacting protein 1; AltName: Full=PAX transactivation activation domain-interacting protein;`Eukaryota; Metazoa; Chordata; Craniata; Vertebrata; Euteleostomi; Mammalia; Eutheria; Euarchontoglires; Primates; Haplorrhini; Catarrhini; Hominidae; Homo.	GO:0035097^cellular_component^histone methyltransferase complex`GO:0016363^cellular_component^nuclear matrix`GO:0060612^biological_process^adipose tissue development`GO:0060717^biological_process^chorion development`GO:0030330^biological_process^DNA damage response, signal transduction by p53 class mediator`GO:0006310^biological_process^DNA recombination`GO:0006281^biological_process^DNA repair`G…	MSNQQQGEMAAVESGGGFSQKRNSQDSQQPSPLALLAATCSRIEPPGENDSSSEQHQTQQQLKINQVFTSNANGWQVVPLSLQTSPGSNTTTTTDSTGAMTGGEKGRQVLSPSEAAVCSQAQQQQQQQQQQQMHQQQMFSQQQQPHAFPQQQLRPQQLLRPGLQQLQQQQVLQQHLQQFQQQRMQMLQQQQQQQNPQQLHQQHLQQQHLLQQQQHMQHLQKQHLQNQNQQILQHPQQQTTTLQPQLQQLPHVSQLFGHEPGLDIPQDGFLLGCVFVIADYPEQMADKQLLATWKRVIQACGGTVDSTLTSRCTHLLCESQVSNVYVQALREGKRCVTAHWLNTVLKKKRMVPPHRTLHLPFAFPPGAKPCSQHIISVTGFVDADRDDLKLMAYLAGARF…	AACTGCTCAAAATTTATTTCAAAAACTGACTTTTTTTTTCTTTTTAACACTTTTTTATCTTGAAAAAGGAAAACATTTAATCCTCTATTATTTTAAGAAACATTGCACAAAAATAACCTTTCTTCTCAAACGGCTAACAAGAAGCTACAAAACAGGGAGGGGGGGTTCTGCAACGAAAGAAGCAGCAGCGGGCCAAAGTCTTCAGTCTGCAGCGTCTTCGTTTGGTCAGGTGAATTTATATGATTGATAGTCCAGCTTCTGGGTGAGAACTCCGGTCAGAATGAACTCTGCATTGTGGACATCTATATTTTTCATAAAGTATTCTCTGCACAGGTGGAGATCGTTGTCACAGGATATCAGGACGATCTCTGGGAGGTTCTTGTTCTGTTTGTGCTCCAT…
P0C7T5	1.8089	3.67319	0.00474876	sp|P0C7T5|ATX1L_HUMAN`P0C7T5`Q:1-817,H:1-689`38.34%ID`E:4e-106`RecName: Full=Ataxin-1-like; AltName: Full=Brother of ataxin-1; Short=Brother of ATXN1;`Eukaryota; Metazoa; Chordata; Craniata; Vertebrata; Euteleostomi; Mammalia; Eutheria; Euarchontoglires; Primates; Haplorrhini; Catarrhini; Hominidae; Homo.	GO:0030425^cellular_component^dendrite`GO:0005634^cellular_component^nucleus`GO:0003677^molecular_function^DNA binding`GO:0003723^molecular_function^RNA binding`GO:0006355^biological_process^regulation of transcription, DNA-dependent`GO:0006351^biological_process^transcription, DNA-dependent	MKPAQERNQECLPPKKRDLPVNNSTGAGGTGGGTTAAGGVAGEDEAPSSQNSAANSETQGGTSSGEWLQAQAGYHYRVDHSDSISTVPVDHYSMLYKVAVPSVTYSSNNLHPVLSHISQAYTVHSPLLQHPGLPYPPLGYAQIPHSSLQFVSPPYAAVPYALPPGFVPGSLISPSGPIPQAHSVSHLVPYPSIIQEGVVSPPPQAQVATHTFAKASGGVPLMLPSEQAAQQHLGTVGVLPAGELSSRGLYHPQGSRGSSGLRDAHSSELANETEMNGGDREQGGKEVGQDSTHTARNAHLPRVTSTSATQEHSQARVLQTRRLDGRNSPGQRSTPDSDLEVQQVVGRLASSSQGNSGLRKEVTFAPLNLCQGGQRAVDVHSESTAGVSARNVYSAQPLS…	TGAGCAAAAGTGGTGACGTCATTTGTGAGCGCCTCTGTTGGCCTTCGAAATGGGCTTGACTCGTTAGCCCTGATTTCGTTTTATCGTCCCCCTGCACGGCAACTTTTTGTCAAGAAACTCCCGTCCGCGATGACATTTGTAGGTGAATTGGCAGACAAAGTCAGCCCCCTCTTTGCAGAACTGGTTCCTGTGTGGGCGGACTGGCCTGCAAGTTTCACTTCCTGTGCAGTACAGTAGAGCGACTTGTTTGGTCAGAGGATTACCATGAAACCAGCTCAGGAGCGTAACCAGGAGTGCCTGCCTCCAAAAAAGAGGGACCTCCCTGTCAACAACAGCACTGGAGCAGGGGGGACAGGAGGAGGCACTACAGCCGCTGGGGGGGTTGCTGGAGAAGACGAG…
Q62717	1.80478	1.98469	0.0199689	sp|Q62717|CAPS1_RAT`Q62717`Q:1-529,H:758-1281`87.55%ID`E:0`RecName: Full=Calcium-dependent secretion activator 1; AltName: Full=Calcium-dependent activator protein for secretion 1; Short=CAPS-1; Short=rCAPS;`Eukaryota; Metazoa; Chordata; Craniata; Vertebrata; Euteleostomi; Mammalia; Eutheria; Euarchontoglires; Glires; Rodentia; Sciurognathi; Muroidea; Muridae; Murinae; Rattus.	GO:0030054^cellular_component^cell junction`GO:0030659^cellular_component^cytoplasmic vesicle membrane`GO:0045202^cellular_component^synapse`GO:0005509^molecular_function^calcium ion binding`GO:0005543^molecular_function^phospholipid binding`GO:0045956^biological_process^positive regulation of calcium ion-dependent exocytosis`GO:0015031^biological_process^protein transport`GO:0045055^biological_p…	VHGNSSCSSFRPDGIGTVTIEEKERFEEIKERLRVLLENQITHFRYCFPFGRPEGALKATLSLLERVLMKDIVTPVRQDEVKTAIRECLEQAALVNYQRLSEYAKLEENVGRLVTPAKKLEDTIRLAELVIEVLQQNEEHHAEAFAWWSDLMVEHAETFLCLYSADMDAALEVQPPDSWDSFPLFQLLNDFMRIDYNLCNGKFHRHLQDLYAPLVVRYVDLMESSIAQSIHRGFERETWEPVNNGSGTSEDLFWKLDALQTFIKDLHWPEEEFGKHLETRLKLMSSDMIESCVKRTRAAFEAKLQRSSRTTDFRVPQSICTMFNVMVDAKAQSAKLCTVDLGQERQYHSQIDNLIEETVKEMITLLVAKFAVILESVLSKLSRYDEGTLFSSFLSFTVK…	ACGTGCATGGAAACAGCTCCTGTTCGTCTTTCAGGCCTGATGGTATCGGCACAGTGACCATAGAGGAGAAGGAGCGCTTTGAGGAGATCAAAGAGAGGCTGCGGGTGCTCCTGGAGAACCAGATCACACACTTCAGGTACTGCTTTCCGTTTGGACGGCCGGAAGGAGCTCTCAAGGCAACCCTGTCTTTGCTCGAAAGAGTTTTGATGAAAGATATCGTCACTCCCGTCCGACAAGACGAGGTGAAAACTGCCATCAGGGAGTGTCTGGAGCAGGCCGCGCTGGTCAACTACCAGCGACTGTCGGAGTACGCCAAACTAGAAGAGAACGTGGGCCGCCTGGTCACGCCCGCCAAAAAACTGGAGGACACCATCCGCCTGGCAGAGCTGGTGATCGAGG…
O76074	1.80158	1.24857	0.0298232	sp|O76074|PDE5A_HUMAN`O76074`Q:1-153,H:715-867`69.28%ID`E:7e-61`RecName: Full=cGMP-specific 3',5'-cyclic phosphodiesterase; EC=3.1.4.35; AltName: Full=cGMP-binding cGMP-specific phosphodiesterase; Short=CGB-PDE;`Eukaryota; Metazoa; Chordata; Craniata; Vertebrata; Euteleostomi; Mammalia; Eutheria; Euarchontoglires; Primates; Haplorrhini; Catarrhini; Hominidae; Homo.	GO:0005829^cellular_component^cytosol`GO:0047555^molecular_function^3',5'-cyclic-GMP phosphodiesterase activity`GO:0004114^molecular_function^3',5'-cyclic-nucleotide phosphodiesterase activity`GO:0030553^molecular_function^cGMP binding`GO:0046872^molecular_function^metal ion binding`GO:0008270^molecular_function^zinc ion binding`GO:0007596^biological_process^blood coagulation`GO:0046069^biologica…	MIEKAILATDLALYMKKREDFFELTKNNQFVWVDEHHRDLLRSMLMTACDISAITKPWPVQKRVAELVATEFFEQGDKERRELNIEPTDLMNREKRDKIPSMQVSFIDAICIQLYETLAGLSEHCSPLLEGCQKNRQHWKRLADDCEKGLVNGLV*	TGGGGTTGGGGTCGGTTTTGGCCCGACTCAAAGGAAAGAACACATATTTGTTTTCAAACCTTTACTGCTGTTCCATTATCCACGTGCTGGCTCTAAACACACTTGAAATTGAAGTGGCCTTGAATATTGTGTTGGCAAAACACCTGAGACGTGCACTGGATCCAGGGAAACCAAATCTTGAGTGGCCTCTCTCTGGACGAGTACAAGGCCACTCTGAAGATGATAGAAAAGGCAATCCTGGCCACAGACCTCGCTCTTTATATGAAGAAGCGGGAAGACTTCTTTGAGCTCACCAAGAATAACCAGTTTGTTTGGGTGGATGAACATCACAGAGACTTGCTGAGGTCTATGCTGATGACTGCATGTGATATCTCTGCCATCACAAAGCCCTGGCCAGTG…
P70627	1.80093	2.33589	0.043436	sp|P70627|FOLH1_RAT`P70627`Q:2-288,H:462-748`64.11%ID`E:2e-108`RecName: Full=Glutamate carboxypeptidase 2; EC=3.4.17.21; AltName: Full=Folate hydrolase 1; AltName: Full=Folylpoly-gamma-glutamate carboxypeptidase; Short=FGCP; AltName: Full=Glutamate carboxypeptidase II; Short=GCPII; AltName: Full=Membrane glutamate carboxypeptidase; Short=mGCP; AltName: Full=N-acetylated-alpha-linked acidic dipept…	GO:0005737^cellular_component^cytoplasm`GO:0005887^cellular_component^integral to plasma membrane`GO:0005634^cellular_component^nucleus`GO:0004180^molecular_function^carboxypeptidase activity`GO:0016805^molecular_function^dipeptidase activity`GO:0046872^molecular_function^metal ion binding`GO:0008237^molecular_function^metallopeptidase activity`GO:0006760^biological_process^folic acid-containing …	MYTLRVDCTPSLHTVVYDVTKQIASPEEGEEGVSLYESWHKRDNWTNDRDAPRISKLGSGSDFEAYFIRLGIAAGRARYTKDKKTERYSSYPVYHSVYETFEIVEQFYDPSFRRLQAVAQVRGGLTFLLANSQLLPLDANEYADALRKYAQSIAQLAEQNPDEMAMFDVSFDSLFSAVQNFTVAARDFHERLKNLNRDDPLQVRLVNDQLMYLERAFIDPLGLPGRPFYRHVIFAPSSHNKYAGESFPGIYDALFDIQNSPNPKKAWQEVKRQISVAAFTVHAAAMTLTPPA*	GGTTAGAATTGGGTTATAATGGGGTTTAGAATTGGAGTTTGTGTCTACCTCTCACTTCTGTAAATGGAAAAAACTCACAACAACATCAAGAAGACAGAAAGTGTGTGTGTGCAGGATGGAGACCGAGGAGGAGCATTATATTTGCGAGTTGGGACGCAGAGGAGTTTGGTCTGCTGGGATCTACAGAATGGGCAGAGGACAACGCCAGGCTGCTGCAGCAGAGAGCTGTGGCTTACATTAATGCAGACTCTGCCATCGAGGGGATGTACACACTGAGAGTCGACTGCACTCCATCACTGCACACTGTGGTCTATGACGTCACCAAGCAGATAGCCAGTCCAGAGGAAGGAGAGGAAGGAGTTTCTTTGTATGAGAGCTGGCACAAAAGAGACAACTGGA…
O55230	1.79037	1.08952	0.0341156	sp|O55230|RA51D_MOUSE`O55230`Q:4-311,H:4-312`54.98%ID`E:9e-89`RecName: Full=DNA repair protein RAD51 homolog 4; AltName: Full=R51H3; AltName: Full=RAD51 homolog D; AltName: Full=RAD51-like protein 3;`Eukaryota; Metazoa; Chordata; Craniata; Vertebrata; Euteleostomi; Mammalia; Eutheria; Euarchontoglires; Glires; Rodentia; Sciurognathi; Muroidea; Muridae; Murinae; Mus; Mus.	GO:0005634^cellular_component^nucleus`GO:0005524^molecular_function^ATP binding`GO:0003677^molecular_function^DNA binding`GO:0008094^molecular_function^DNA-dependent ATPase activity`GO:0006310^biological_process^DNA recombination`GO:0006281^biological_process^DNA repair	MVPLQEGMCPGLDGGLLRSLLAADIRTVEDLVSSDLEDVSRKCSVSYKALFSIRRVLLAQHTAFPVSGADLYEELLSSTAIISTGNPSLDKLLDSGLYTGEITELSGGPGSGKSQVCFGVAVHVSLQLKQSVIYVDTTGGLTASRLLEMLQSETSDGDEQMEALQRIHVFRLFDAYSLRDCLSALRRGGLLQASGGGSVKAVIVDSVSAVISPLLGGKQNEGMSLMIQAAVALKTMAKDFSVAVLVTNHVTRGGGGGVQPGLGASWSHIPRTRILLERVDRAPSGCSSTLRSATLIKSSRQPCHIKEEFDLQRQSRSVRSSSGKRKRDEADS*	ATTTCTGATGAGATATCGCAGATGCATGTGAAGTAACTTCGTTTCCCAAGAGGCAATGCGCGAATGTTCGCGTGTACGGCAAGCGACAAGGCAACGTCCGGCTCATTTGCTTTAGGTTTTTTGAAACTTATTAGCGCGTACGTCGTTATAACTTTCTTAAAATTTGAGTTTAAGGAAATACACATTTTTGTTTATTGTTTATTTAAAGGTGTTTTTATTGATACATTTCTATAGAAGGAGACGTTTAGCGGCTTCAGAGTTTGTTTCAAAGTTTGCTAAAGTTAGCTTGAAAGCTAAAAACAAACCTCTGAACATTTTTTCTTTTTTTTTTTTATCTTGAAACCTCCGAGCATCCTAACGGGTTTGTGGTTCAACGCCATGCAGAACCATGGTGCCGTT…
P40238	1.75102	2.11961	0.0408596	sp|P40238|TPOR_HUMAN`P40238`Q:1-439,H:79-589`21.9%ID`E:5e-21`RecName: Full=Thrombopoietin receptor; Short=TPO-R; AltName: Full=Myeloproliferative leukemia protein; AltName: Full=Proto-oncogene c-Mpl; AltName: CD_antigen=CD110; Flags: Precursor;`Eukaryota; Metazoa; Chordata; Craniata; Vertebrata; Euteleostomi; Mammalia; Eutheria; Euarchontoglires; Primates; Haplorrhini; Catarrhini; Hominidae; Homo.	GO:0005887^cellular_component^integral to plasma membrane`GO:0004896^molecular_function^cytokine receptor activity`GO:0004888^molecular_function^transmembrane signaling receptor activity`GO:0008283^biological_process^cell proliferation`GO:0019221^biological_process^cytokine-mediated signaling pathway`GO:0048872^biological_process^homeostasis of number of cells`GO:0030168^biological_process^platel…	MSVQSTAKGSFLHICSFSDVQIFVKMDIKVVELASNTVSYHRTLSVEDNYLPDPPFNLTLQPNGPGQLEVSWLAKTKCKIFNHMTYKIRYSTGTNKERTVETDKQSLELSLTQGEEVEVQVSAKCGFNKDAGHWSSWTQPVHATVPQRADDISLTCSTFDLKNVTCHWNGFMASEERENKLFYKMEIKESPDWTPWSECGRSGNITNICHIHGNESKEVMIMLISTSAASRKTFFTKAFKLKNSIKTFPPSRLRGTPKKQELCLDWEAPPLLLETHLQYEVDINIKGGERWKMIKESETRTCMKVPAGSHFTVKIRAKPAGPIYSGNWSDWSEEFTGEMTPDMDAFLVGFLLITPLIIGVVFIPILFIYRSKLKHYFWPPVPNLEKVLQGFLTEVSGQK…	GATCTGTCCAGCTGCACGACACTGATCTGTCACTGGATTTCCTCCACCAACCAACCACAGGATTGTCTGTCAAACATTGACGCAGTGAGCCAGCTTCCTGAAGTCTCTATTACGTTTGTGATATTTTGCTTCTGAAGGATCTGCAGAATCCAAAGTGTTTCACTCGGACACTTAAAGACTTCACCTGCTTCTTTGAGACATTTGACAACAAAACCTATGATTTGATCTACGACTACGATAGCAATCCCTCAAAATGTGCAATGTCAGTCCAGAGCACAGCAAAAGGATCGTTCCTGCACATATGTTCATTTTCAGACGTCCAAATTTTTGTGAAAATGGACATCAAAGTGGTGGAACTTGCCAGTAACACTGTTTCCTACCATCGGACTCTCTCTGTGG…
A5PF10	1.7496	2.06332	0.0475103	sp|A5PF10|NEUR1_PIG`A5PF10`Q:58-413,H:55-414`61.22%ID`E:9e-130`RecName: Full=Sialidase-1; EC=3.2.1.18; AltName: Full=Acetylneuraminyl hydrolase; AltName: Full=Lysosomal sialidase; AltName: Full=N-acetyl-alpha-neuraminidase 1; Flags: Precursor;`Eukaryota; Metazoa; Chordata; Craniata; Vertebrata; Euteleostomi; Mammalia; Eutheria; Laurasiatheria; Cetartiodactyla; Suina; Suidae; Sus.	GO:0016023^cellular_component^cytoplasmic membrane-bounded vesicle`GO:0043202^cellular_component^lysosomal lumen`GO:0005765^cellular_component^lysosomal membrane`GO:0005886^cellular_component^plasma membrane`GO:0052794^molecular_function^exo-alpha-(2->3)-sialidase activity`GO:0052795^molecular_function^exo-alpha-(2->6)-sialidase activity`GO:0052796^molecular_function^exo-alpha-(2->8)-sialidase ac…	MCRTASGFVLSVLGSSCAAQSKMSGSGRSSGVFAGPVLVSLLCALLHRCVCYNTSAQIDPVVFEEQLLWVSGGSGHVDTYRIPVLTFTPKGSLLAFAEGRKSTSSDIGAKFLAMRRSTDRGNTWSPTVFIVDDVKNPDGLNLGSVVVDQEVGSIFLIYSLCFHLYHCRPPSTMMVESRDDGLSWSSPRNLSVELGVKAFAPGPGFGIQKRYSPAKGRLVVCGHGSLEGDGVFCILSDDHGKSWRNGAALKSIPYNQKKSAQDFNPDECQPVEMRDGSILINVRNQNNYHCRCRVMARSLDGGESLPIDELYFDSELVDPAVAAGALQKNGILYFTNPSNDRNRVNLTLRWSLTNGSSWEKTAVQIWAGPSGYSCMSSLDTGSVEDQKFVFVVYEKGHKD…	GGAGGAAACAAACATAGAGCAGTTTATAAAATAAATAATAATCAAAGAAAAAAATTCATGTGGTTTTAATTGATTTGGGTGATTAAAATATATATTATAATCAGTCTTCTGTGTTCTGCTGAGTTTTTATAGTTTTCCCTCTTCTTTACACTCGACACCAGCAGCTTTTTTCTGGCTGTAAAAGTGTTAACTTATTTTTAGGAGGAAAAAAATACACATTTTTTTGTGATAATCAGAATTCTGATTTAATTTATTTTAAAGAAACTTTGAAAAATATCATCAATGTAGAACAGTATGAAAAAAAAAAACATTTTCATGCATCATAAGAGCTTTTAAAGTACAGATTTACAGATTTGAATCAAGCTGGCTCATTTTTTTTAAAACCATCACAGAAATTAA…
[truncated: 358 more rows]
